# Supplementary material for: Discovery and validation of a prognostic proteomic signature for tuberculosis progression: A prospective cohort study
Source: PLoS Med. 2019 Apr 16;16(4):e1002781. doi: 10.1371/journal.pmed.1002781 (PMC6467365; doi:10.1371/journal.pmed.1002781)
Supplement: S1 Table — ACS, Adolescent Cohort Study. (XLSX) [file pmed.1002781.s007.xlsx]

## Sheet: S1_Data. ACS metadata
S1 Data. Metadata of the adolescent cohort study progressor and non-progrogessor (control) cohort. The numbers indicated in the sampling columns (K-P) indicate the time to TB in days). NA, not available or applicable.
PID	StudyGroup	Sex	AgeAtLastBirthDay	Ethnicity	SchoolCode	PreviousDiagnosisOfTB	EnrolmentDate	SampleGroup	Group	Day 0 sample	Day 180 sample	Day 360 sample	Day 540 sample	Day 720 sample	TB diagnosis sample
ACS00526	passive	female	17	Cape Mixed Ancestry	H	n	2006-11-29	TEST	progressor	733	NA	NA	NA	NA	NA
ACS00826	passive	male	16	Cape Mixed Ancestry	H	n	2006-11-20	TRAINING	progressor	457	NA	NA	NA	NA	NA
ACS01031	active	female	12	Cape Mixed Ancestry	D	n	2006-07-19	TEST	progressor	434	243	79	NA	NA	NA
ACS01484	active	female	16	Cape Mixed Ancestry	D	n	2006-08-03	TRAINING	progressor	308	113	NA	NA	NA	NA
ACS02373	active	female	17	Cape Mixed Ancestry	E	y	2006-09-18	TRAINING	progressor	894	NA	544	351	NA	NA
ACS02884	active	female	18	black	F	n	2006-08-16	TEST	progressor	184	1	NA	NA	NA	NA
ACS04151	passive	female	18	Cape Mixed Ancestry	H	y	2006-11-22	TEST	progressor	698	NA	NA	NA	NA	NA
ACS04978	active	female	17	Cape Mixed Ancestry	E	n	2006-10-31	TEST	progressor	633	445	275	78	NA	NA
ACS05229	active	female	15	Cape Mixed Ancestry	E	y	2006-09-07	TRAINING	progressor	554	375	204	8	NA	NA
ACS06088	passive	female	17	Cape Mixed Ancestry	H	n	2007-03-06	TRAINING	progressor	280	NA	NA	NA	NA	NA
ACS06375	passive	male	15	Cape Mixed Ancestry	B	n	2007-03-19	TEST	progressor	268	NA	NA	NA	NA	NA
ACS06712	active	female	16	Cape Mixed Ancestry	E	n	2006-09-07	TRAINING	progressor	258	79	NA	NA	NA	NA
ACS06713	active	male	15	Cape Mixed Ancestry	D	n	2006-07-20	TRAINING	progressor	198	NA	NA	NA	NA	NA
ACS07217	active	female	14	Cape Mixed Ancestry	E	n	2006-10-12	TEST	progressor	461	273	103	NA	NA	NA
ACS07592	passive	female	13	Cape Mixed Ancestry	A	n	2006-07-18	TEST	progressor	199	NA	NA	NA	NA	NA
ACS07593	active	male	15	Cape Mixed Ancestry	E	n	2006-10-11	TRAINING	progressor	600	411	227	62	NA	NA
ACS07833	active	female	15	Cape Mixed Ancestry	E	y	2006-10-05	TRAINING	progressor	211	NA	NA	NA	NA	NA
ACS08550	active	female	17	Cape Mixed Ancestry	E	n	2006-08-24	TRAINING	progressor	256	70	NA	NA	NA	NA
ACS08871	active	female	16	Cape Mixed Ancestry	E	n	2006-09-18	TRAINING	progressor	389	196	31	NA	NA	NA
ACS09203	active	female	17	Cape Mixed Ancestry	E	n	2006-09-07	TRAINING	progressor	739	560	389	200	NA	NA
ACS09605	passive	female	16	Cape Mixed Ancestry	H	n	2006-11-10	TRAINING	progressor	385	NA	NA	NA	NA	NA
ACS10700	passive	male	15	Cape Mixed Ancestry	H	n	2006-11-10	TRAINING	progressor	563	NA	NA	NA	NA	NA
ACS10832	active	male	18	Cape Mixed Ancestry	E	n	2006-08-24	TEST	progressor	91	NA	NA	NA	NA	NA
ACS11816	active	female	14	Cape Mixed Ancestry	E	n	2006-12-07	TRAINING	progressor	739	574	388	203	NA	NA
ACS12014	active	female	16	Cape Mixed Ancestry	E	n	2006-10-11	TRAINING	progressor	728	539	373	188	NA	NA
ACS12076	passive	female	14	Cape Mixed Ancestry	H	n	2006-11-15	TRAINING	progressor	210	NA	NA	NA	NA	NA
ACS12154	active	female	18	Cape Mixed Ancestry	E	n	2006-08-11	TRAINING	progressor	557	378	193	13	NA	NA
ACS12547	active	female	16	Cape Mixed Ancestry	E	n	2006-09-18	TRAINING	progressor	284	106	NA	NA	NA	NA
ACS13993	active	male	17	Cape Mixed Ancestry	D	n	2006-10-03	TRAINING	progressor	461	241	NA	NA	NA	NA
ACS02374	active	female	16	Cape Mixed Ancestry	D	n	2006-03-15	TRAINING	progressor	NA	409	217	38	NA	NA
ACS02956	active	female	13	Cape Mixed Ancestry	D	n	2006-04-11	TEST	progressor	NA	278	54	NA	NA	NA
ACS04321	active	female	15	Cape Mixed Ancestry	D	n	2006-09-01	TEST	progressor	NA	205	37	NA	NA	NA
ACS08868	active	female	13	Cape Mixed Ancestry	D	y	2006-08-15	TEST	progressor	NA	NA	433	251	NA	NA
ACS10457	active	male	14	Cape Mixed Ancestry	D	n	2006-07-12	TEST	progressor	NA	429	266	70	NA	2
ACS11141	active	female	16	Cape Mixed Ancestry	E	n	2006-09-18	TRAINING	progressor	NA	456	284	99	NA	NA
ACS13026	active	male	17	Cape Mixed Ancestry	D	n	2006-02-08	TRAINING	progressor	NA	254	79	NA	NA	NA
ACS11589	passive	female	13	Cape Mixed Ancestry	A	n	2006-05-22	TRAINING	progressor	NA	NA	NA	NA	87	NA
ACS00082	passive	male	16	Cape Mixed Ancestry	H	n	2006-11-15	TRAINING	control	-	NA	NA	NA	NA	NA
ACS00264	active	female	14	Cape Mixed Ancestry	D	n	2006-07-12	TRAINING	control	-	-	-	-	NA	NA
ACS00285	active	female	16	Cape Mixed Ancestry	E	n	2006-08-31	TRAINING	control	-	-	-	-	NA	NA
ACS00426	active	male	17	Cape Mixed Ancestry	D	n	2006-08-29	TRAINING	control	-	-	-	-	NA	NA
ACS00542	passive	female	13	Cape Mixed Ancestry	A	n	2006-07-11	TRAINING	control	-	NA	NA	NA	NA	NA
ACS00928	active	female	13	Cape Mixed Ancestry	E	n	2006-11-23	TEST	control	-	-	-	-	NA	NA
ACS01075	active	female	16	Cape Mixed Ancestry	E	n	2006-09-07	TRAINING	control	-	-	-	-	NA	NA
ACS01080	active	female	18	black	F	n	2006-08-30	TRAINING	control	-	-	-	-	NA	NA
ACS01220	passive	female	14	Cape Mixed Ancestry	H	n	2007-02-27	TRAINING	control	-	NA	NA	NA	NA	NA
ACS01264	active	female	16	Cape Mixed Ancestry	E	n	2006-09-11	TRAINING	control	-	-	-	-	NA	NA
ACS01319	active	male	17	Cape Mixed Ancestry	E	n	2006-09-11	TEST	control	-	-	-	-	NA	NA
ACS01552	active	male	17	Cape Mixed Ancestry	E	n	2006-09-14	TEST	control	-	-	-	-	NA	NA
ACS01677	active	female	16	Cape Mixed Ancestry	E	n	2006-09-18	TRAINING	control	-	-	-	-	NA	NA
ACS01964	active	female	16	Cape Mixed Ancestry	E	n	2006-09-07	TRAINING	control	-	-	-	-	NA	NA
ACS01995	active	female	16	Cape Mixed Ancestry	E	n	2006-09-04	TRAINING	control	-	-	-	-	NA	NA
ACS02059	passive	female	13	Cape Mixed Ancestry	A	n	2006-07-11	TRAINING	control	-	NA	NA	NA	NA	NA
ACS02120	passive	female	16	black	H	n	2006-12-05	TRAINING	control	-	NA	NA	NA	NA	NA
ACS02437	passive	male	17	black	C	n	2006-07-10	TEST	control	-	NA	NA	NA	NA	NA
ACS02506	active	female	15	Cape Mixed Ancestry	D	y	2006-08-25	TRAINING	control	-	-	-	-	NA	NA
ACS02569	active	female	17	Cape Mixed Ancestry	E	y	2006-08-31	TEST	control	-	-	-	-	NA	NA
ACS02677	active	female	16	Cape Mixed Ancestry	E	n	2006-08-31	TRAINING	control	-	-	-	-	NA	NA
ACS02766	active	female	16	Cape Mixed Ancestry	E	n	2006-09-11	TRAINING	control	-	-	-	-	NA	NA
ACS02807	active	female	17	Cape Mixed Ancestry	E	y	2006-08-31	TEST	control	-	-	-	-	NA	NA
ACS02878	active	female	14	Cape Mixed Ancestry	D	y	2006-07-19	TRAINING	control	-	-	-	-	NA	NA
ACS02949	passive	male	15	Cape Mixed Ancestry	H	n	2007-03-06	TRAINING	control	-	NA	NA	NA	NA	NA
ACS03037	active	female	14	Cape Mixed Ancestry	D	n	2006-09-01	TEST	control	-	-	-	-	NA	NA
ACS03347	active	female	14	Cape Mixed Ancestry	D	n	2006-07-26	TRAINING	control	-	-	NA	NA	NA	NA
ACS03583	active	female	13	Cape Mixed Ancestry	E	n	2006-11-14	TRAINING	control	-	-	-	-	NA	NA
ACS03595	active	male	15	Cape Mixed Ancestry	D	n	2006-09-15	TRAINING	control	-	-	-	-	NA	NA
ACS03922	active	male	18	Cape Mixed Ancestry	E	n	2006-09-18	TRAINING	control	-	-	-	-	NA	NA
ACS04095	passive	female	16	Cape Mixed Ancestry	H	n	2006-11-13	TEST	control	-	NA	NA	NA	NA	NA
ACS04209	passive	female	16	Cape Mixed Ancestry	A	n	2006-07-18	TRAINING	control	-	NA	NA	NA	NA	NA
ACS04339	active	male	15	Cape Mixed Ancestry	D	n	2006-07-27	TRAINING	control	-	-	-	-	NA	NA
ACS04419	passive	female	13	Cape Mixed Ancestry	H	n	2006-11-17	TRAINING	control	-	NA	NA	NA	NA	NA
ACS04515	active	female	14	Cape Mixed Ancestry	E	n	2006-11-23	TEST	control	-	-	-	-	NA	NA
ACS04517	active	male	15	Cape Mixed Ancestry	E	n	2006-09-14	TRAINING	control	-	-	-	NA	NA	NA
ACS04694	active	female	17	Cape Mixed Ancestry	E	n	2006-09-04	TRAINING	control	-	-	-	-	NA	NA
ACS05267	passive	male	14	Cape Mixed Ancestry	A	n	2006-07-18	TEST	control	-	NA	NA	NA	NA	NA
ACS05274	active	female	14	Cape Mixed Ancestry	E	n	2006-11-14	TEST	control	-	-	-	-	NA	NA
ACS05669	passive	male	17	black	C	n	2006-07-10	TEST	control	-	NA	NA	NA	NA	NA
ACS05852	passive	female	17	Cape Mixed Ancestry	H	n	2006-11-29	TEST	control	-	NA	NA	NA	NA	NA
ACS05925	active	female	16	Cape Mixed Ancestry	E	n	2006-09-11	TRAINING	control	-	-	-	-	NA	NA
ACS06008	active	male	17	Cape Mixed Ancestry	D	n	2006-09-12	TRAINING	control	-	-	-	-	NA	NA
ACS06155	active	female	13	Cape Mixed Ancestry	D	n	2006-08-08	TEST	control	-	-	-	-	NA	NA
ACS06201	active	male	17	Cape Mixed Ancestry	E	n	2006-08-31	TRAINING	control	-	-	-	-	NA	NA
ACS06468	active	female	17	Cape Mixed Ancestry	E	y	2006-08-31	TRAINING	control	-	-	-	-	NA	NA
ACS06818	passive	female	15	Cape Mixed Ancestry	H	y	2006-11-10	TRAINING	control	-	NA	NA	NA	NA	NA
ACS06871	passive	male	15	Cape Mixed Ancestry	H	n	2006-11-10	TEST	control	-	NA	NA	NA	NA	NA
ACS06877	active	female	18	black	F	n	2006-08-16	TEST	control	-	-	-	-	NA	NA
ACS07013	active	female	13	Cape Mixed Ancestry	E	y	2006-11-23	TEST	control	-	-	-	-	NA	NA
ACS07052	passive	male	15	Cape Mixed Ancestry	H	n	2006-11-13	TEST	control	-	NA	NA	NA	NA	NA
ACS07103	passive	male	16	Cape Mixed Ancestry	H	n	2006-11-20	TEST	control	-	NA	NA	NA	NA	NA
ACS07147	active	female	15	Cape Mixed Ancestry	D	y	2006-09-05	TEST	control	-	-	-	-	NA	NA
ACS07180	active	male	17	Cape Mixed Ancestry	E	n	2006-08-21	TRAINING	control	-	-	-	-	NA	NA
ACS07191	passive	female	16	black	H	n	2006-11-08	TRAINING	control	-	NA	NA	NA	NA	NA
ACS07249	passive	male	16	Cape Mixed Ancestry	H	n	2006-11-13	TRAINING	control	-	NA	NA	NA	NA	NA
ACS07255	active	male	14	Cape Mixed Ancestry	D	n	2006-08-29	TRAINING	control	-	-	-	-	NA	NA
ACS07442	active	female	16	Cape Mixed Ancestry	E	n	2006-12-07	TRAINING	control	-	-	-	-	NA	NA
ACS07481	passive	male	14	Cape Mixed Ancestry	H	n	2006-11-08	TEST	control	-	NA	NA	NA	NA	NA
ACS07535	passive	female	15	Cape Mixed Ancestry	H	y	2006-11-17	TRAINING	control	-	NA	NA	NA	NA	NA
ACS07603	active	male	17	Cape Mixed Ancestry	E	n	2006-09-11	TRAINING	control	-	-	-	-	NA	NA
ACS07728	passive	male	15	Cape Mixed Ancestry	H	n	2006-11-13	TEST	control	-	NA	NA	NA	NA	NA
ACS07738	passive	female	17	Cape Mixed Ancestry	H	n	2006-11-20	TRAINING	control	-	NA	NA	NA	NA	NA
ACS07739	passive	male	15	Cape Mixed Ancestry	H	n	2006-11-10	TEST	control	-	NA	NA	NA	NA	NA
ACS08062	passive	female	13	Cape Mixed Ancestry	A	n	2006-07-18	TRAINING	control	-	NA	NA	NA	NA	NA
ACS08147	passive	male	15	Cape Mixed Ancestry	H	n	2006-11-13	TRAINING	control	-	NA	NA	NA	NA	NA
ACS08528	passive	female	17	Cape Mixed Ancestry	H	n	2007-02-20	TEST	control	-	NA	NA	NA	NA	NA
ACS08650	passive	female	15	Cape Mixed Ancestry	H	y	2006-11-17	TRAINING	control	-	NA	NA	NA	NA	NA
ACS08793	active	female	16	Cape Mixed Ancestry	E	n	2006-09-18	TRAINING	control	-	-	-	-	NA	NA
ACS08834	active	female	17	Cape Mixed Ancestry	D	n	2006-07-19	TRAINING	control	-	-	-	-	-	NA
ACS08919	passive	male	15	black	H	n	2007-03-06	TEST	control	-	NA	NA	NA	NA	NA
ACS09122	passive	male	17	Cape Mixed Ancestry	H	n	2006-11-29	TRAINING	control	-	NA	NA	NA	NA	NA
ACS09285	passive	female	13	Cape Mixed Ancestry	H	n	2006-11-08	TRAINING	control	-	NA	NA	NA	NA	NA
ACS09342	active	female	17	Cape Mixed Ancestry	E	n	2006-08-11	TRAINING	control	-	-	-	NA	NA	NA
ACS09360	active	female	14	Cape Mixed Ancestry	D	y	2006-09-15	TRAINING	control	-	-	-	-	NA	NA
ACS09488	active	female	15	Cape Mixed Ancestry	E	n	2006-09-14	TEST	control	-	-	-	-	NA	NA
ACS09592	passive	male	16	Cape Mixed Ancestry	H	n	2006-11-24	TEST	control	-	NA	NA	NA	NA	NA
ACS09660	passive	female	18	Cape Mixed Ancestry	H	y	2006-12-05	TRAINING	control	-	NA	NA	NA	NA	NA
ACS10040	active	male	16	Cape Mixed Ancestry	D	n	2006-08-29	TRAINING	control	-	-	-	-	NA	NA
ACS10134	active	female	14	Cape Mixed Ancestry	D	y	2006-07-20	TRAINING	control	-	-	-	NA	NA	NA
ACS10168	passive	female	13	Cape Mixed Ancestry	H	n	2006-11-15	TRAINING	control	-	NA	NA	NA	NA	NA
ACS10287	active	female	17	Cape Mixed Ancestry	E	n	2006-09-18	TRAINING	control	-	-	-	-	NA	NA
ACS10295	passive	female	14	Cape Mixed Ancestry	H	n	2006-11-15	TRAINING	control	-	NA	NA	NA	NA	NA
ACS10373	passive	male	17	Cape Mixed Ancestry	H	n	2007-02-20	TRAINING	control	-	NA	NA	NA	NA	NA
ACS10545	passive	male	15	black	C	n	2006-07-03	TEST	control	-	NA	NA	NA	NA	NA
ACS10604	active	female	17	Cape Mixed Ancestry	E	y	2006-08-31	TRAINING	control	-	-	-	-	NA	NA
ACS10788	active	female	15	Cape Mixed Ancestry	E	n	2006-09-11	TRAINING	control	-	-	-	-	NA	NA
ACS11136	passive	female	15	Cape Mixed Ancestry	H	y	2006-12-01	TEST	control	-	NA	NA	NA	NA	NA
ACS11442	active	female	14	Cape Mixed Ancestry	D	n	2006-09-15	TEST	control	-	-	-	-	NA	NA
ACS11641	active	male	15	Cape Mixed Ancestry	E	n	2006-09-14	TRAINING	control	-	-	-	-	NA	NA
ACS11811	active	female	13	Cape Mixed Ancestry	D	n	2006-09-15	TRAINING	control	-	-	-	-	NA	NA
ACS12157	active	female	16	Cape Mixed Ancestry	E	n	2006-09-18	TRAINING	control	-	-	-	-	NA	NA
ACS12176	active	female	16	Cape Mixed Ancestry	D	n	2006-09-05	TRAINING	control	-	-	-	-	NA	NA
ACS12249	active	male	16	Cape Mixed Ancestry	E	n	2006-09-07	TEST	control	-	-	-	-	NA	NA
ACS12429	active	male	17	Cape Mixed Ancestry	E	n	2006-09-18	TEST	control	-	-	-	-	NA	NA
ACS12479	active	female	18	Cape Mixed Ancestry	E	n	2006-08-11	TRAINING	control	-	-	-	-	NA	NA
ACS12730	passive	female	18	Cape Mixed Ancestry	H	y	2006-11-20	TEST	control	-	NA	NA	NA	NA	NA
ACS12839	active	female	17	Cape Mixed Ancestry	E	n	2006-08-24	TEST	control	-	-	-	-	NA	NA
ACS13022	passive	male	17	Cape Mixed Ancestry	H	n	2006-11-24	TRAINING	control	-	NA	NA	NA	NA	NA
ACS13418	active	male	18	Cape Mixed Ancestry	E	n	2006-08-24	TEST	control	-	-	-	-	NA	NA
ACS13486	active	female	18	Cape Mixed Ancestry	E	n	2006-08-11	TRAINING	control	-	-	-	-	NA	NA
ACS13549	active	female	16	Cape Mixed Ancestry	E	n	2006-09-18	TRAINING	control	-	-	-	-	NA	NA
ACS13564	active	female	16	Cape Mixed Ancestry	E	n	2006-08-24	TRAINING	control	-	NA	-	NA	NA	NA
ACS13732	active	female	15	Cape Mixed Ancestry	D	n	2006-08-22	TEST	control	-	-	-	-	NA	NA
