# Supplementary material for: Discovery and validation of a prognostic proteomic signature for tuberculosis progression: A prospective cohort study
Source: PLoS Med. 2019 Apr 16;16(4):e1002781. doi: 10.1371/journal.pmed.1002781 (PMC6467365; doi:10.1371/journal.pmed.1002781)
Supplement: S2 Table — (XLSX) [file pmed.1002781.s008.xlsx]

## Sheet: S2_Data. GC6 metadata
S2 Data. Metadata of the Gambian household contact progressor and non-progressor (control) validation cohort
sampleID	subjectID	SubjectType	VisitType	TimetoTBMths	SITE	AGE	SEX
GC-4974	09/G258	control	M18	6	MRC	29	F
GC-3585	09/G223	control	M6	4	MRC	52	M
GC-2829	07/G351	control	M18	3	MRC	17	M
GC-3300	08/G245	progressor	M18	3	MRC	16	M
GC-3193	09/G110	control	M6	18	MRC	24	M
GC-2358	08/G643	control	M6	3	MRC	22	F
GC-0453	07/G419	control	BL	10	MRC	52	M
GC-1290	08/G541	control	BL	10	MRC	18	F
GC-4387	09/G476	control	M6	8	MRC	30	F
GC-2409	08/G703	control	M6	8	MRC	60	F
GC-2225	08/G893	control	BL	24	MRC	29	F
GC-1182	07/G414	control	M6	8	MRC	28	M
GC-4059	08/G715	control	M18	4	MRC	20	F
GC-2549	08/G797	control	M6	18	MRC	28	F
GC-3365	09/G367	progressor	BL	10	MRC	56	M
GC-4190	09/G367	progressor	M6	4	MRC	56	M
GC-0784	08/G260	progressor	BL	14	MRC	37	F
GC-0551	07/G491	control	BL	6	MRC	27	M
GC-2674	09/G196	control	BL	3	MRC	19	M
GC-2782	09/G228	control	BL	3	MRC	18	M
GC-2346	09/G112	control	BL	3	MRC	39	F
GC-1579	08/G652	control	BL	10	MRC	51	M
GC-1178	07/G370	control	M6	15	MRC	17	M
GC-3551	08/G433	progressor	M18	6	MRC	26	F
GC-1744	08/G260	progressor	M6	8	MRC	37	F
GC-1135	07/G351	control	M6	15	MRC	17	M
GC-0955	07/G255	control	M6	8	MRC	34	M
GC-2107	08/G493	progressor	M6	2	MRC	37	F
GC-0434	07/G414	control	BL	14	MRC	28	M
GC-1464	08/G109	control	M6	1	MRC	22	F
GC-0609	08/G136	control	BL	4	MRC	22	F
GC-0385	07/G369	control	BL	9	MRC	18	F
GC-5392	10/G407	progressor	M6	1	MRC	22	F
GC-3742	08/G506	control	M18	6	MRC	19	M
GC-1832	08/G797	control	BL	24	MRC	28	F
GC-3149	09/G106	control	M6	5	MRC	18	M
GC-2050	08/G407	control	M6	4	MRC	57	M
GC-4347	10/G261	progressor	BL	3	MRC	38	F
GC-4372	10/G279	progressor	BL	19	MRC	21	F
GC-2066	08/G143	control	M6	15	MRC	21	M
GC-2992	09/G280	progressor	BL	12	MRC	32	F
GC-1871	08/G415	control	M6	3	MRC	32	F
GC-1996	08/G826	control	BL	7	MRC	24	F
GC-2800	09/G238	control	BL	7	MRC	24	F
GC-0965	08/G372	control	BL	12	MRC	36	F
GC-0386	07/G370	control	BL	21	MRC	17	M
GC-0116	07/G189	control	BL	10	MRC	22	F
GC-3421	09/G384	control	BL	3	MRC	40	F
GC-2778	09/G224	control	BL	10	MRC	35	M
GC-3729	09/G497	progressor	BL	3	MRC	22	M
GC-5142	10/G289	progressor	M6	0	MRC	16	F
GC-2531	08/G714	control	M6	2	MRC	44	F
GC-4450	10/G289	progressor	BL	6	MRC	16	F
GC-4362	08/G828	control	M18	3	MRC	18	M
GC-3408	08/G324	control	M18	6	MRC	35	F
GC-2686	09/G204	control	BL	10	MRC	49	M
GC-4435	09/G482	control	M6	13	MRC	23	F
GC-2730	08/G828	control	M6	15	MRC	18	M
GC-1079	08/G433	progressor	BL	24	MRC	26	F
GC-2917	09/G262	progressor	BL	3.5	MRC	26	F
GC-0384	07/G368	control	BL	21	MRC	15	M
GC-3207	08/G196	control	M18	3	MRC	17	M
GC-3333	09/G169	control	M6	5	MRC	18	M
GC-2990	08/G876	progressor	M6	1	MRC	20	F
GC-1909	08/G810	control	BL	22	MRC	21	F
GC-2772	08/G810	control	M6	16	MRC	21	F
GC-0995	07/G274	control	M6	15	MRC	17	M
GC-4724	10/G369	progressor	BL	11	MRC	22	M
GC-4204	09/G371	control	M6	4	MRC	56	M
GC-0757	07/G225	progressor	M6	13	MRC	17	M
GC-2407	08/G695	control	M6	8	MRC	55	F
GC-0368	07/G356	control	BL	7	MRC	16	M
GC-1080	08/G434	control	BL	11	MRC	21	M
GC-0329	07/G322	control	BL	18	MRC	41	M
GC-3390	09/G371	control	BL	10	MRC	56	M
GC-3401	09/G188	control	M6	1	MRC	18	F
GC-0690	08/G198	control	BL	19	MRC	18	F
GC-1714	08/G726	control	BL	8	MRC	48	F
GC-3642	09/G455	control	BL	14	MRC	45	F
GC-4166	10/G178	progressor	BL	11	MRC	26	F
GC-0523	07/G468	progressor	BL	18	MRC	52	M
GC-1176	07/G368	control	M6	15	MRC	15	M
GC-0925	08/G343	control	BL	8	MRC	47	F
GC-5485	10/G139	progressor	M18	3	MRC	17	M
GC-0890	08/G324	control	BL	24	MRC	35	F
GC-4214	09/G390	control	M6	1	MRC	21	F
GC-0538	07/G479	control	BL	18	MRC	39	M
GC-2664	09/G188	control	BL	7	MRC	18	F
GC-1913	08/G814	progressor	BL	4	MRC	20	F
GC-1222	08/G494	progressor	BL	9	MRC	30	F
GC-2698	09/G209	control	BL	3.5	MRC	25	F
GC-0620	08/G143	control	BL	21	MRC	21	M
GC-0363	07/G351	control	BL	21	MRC	17	M
GC-2849	09/G258	control	BL	24	MRC	29	F
GC-2580	09/G162	control	BL	11	MRC	30	M
GC-0859	07/G253	control	M6	13	MRC	16	M
GC-4730	09/G110	control	M18	6	MRC	24	M
GC-3690	09/G482	control	BL	19	MRC	23	F
GC-2627	07/G253	control	M18	1	MRC	16	M
GC-0650	07/G189	control	M6	4	MRC	22	F
GC-0640	08/G160	control	BL	4	MRC	18	F
GC-1844	08/G800	progressor	BL	12	MRC	20	M
GC-1724	08/G249	progressor	M6	18	MRC	22	M
GC-3449	09/G401	control	BL	19	MRC	18	F
GC-4484	09/G455	control	M6	8	MRC	45	F
GC-1013	08/G400	control	BL	21	MRC	15	M
GC-0753	08/G245	progressor	BL	21	MRC	16	M
GC-1667	08/G703	control	BL	14	MRC	60	F
GC-2656	08/G726	control	M6	2	MRC	48	F
GC-2532	08/G715	control	M6	16	MRC	20	F
GC-4991	10/G215	progressor	M6	1	MRC	20	F
GC-0999	07/G328	control	M6	6	MRC	25	F
GC-1070	08/G423	progressor	BL	10	MRC	21	F
GC-1512	08/G613	control	BL	21	MRC	15	M
GC-1581	08/G654	control	BL	11	MRC	26	F
GC-3637	09/G450	control	BL	6	MRC	16	F
GC-2777	09/G223	control	BL	10	MRC	52	M
GC-2158	08/G876	progressor	BL	7	MRC	20	F
GC-2701	09/G212	control	BL	11	MRC	21	M
GC-2799	09/G237	control	BL	3.5	MRC	27	F
GC-1852	08/G333	control	M6	8	MRC	51	F
GC-3837	08/G606	progressor	M18	4	MRC	21	F
GC-0388	07/G372	control	BL	7	MRC	17	M
GC-0155	07/G213	progressor	BL	14	MRC	34	M
GC-3535	09/G238	control	M6	1	MRC	24	F
GC-0762	08/G249	progressor	BL	24	MRC	22	M
GC-0038	07/G123	progressor	BL	15	MRC	31	F
GC-4265	08/G802	control	M18	3	MRC	24	M
GC-2161	08/G496	control	M6	18	MRC	24	M
GC-3620	09/G435	control	BL	3	MRC	18	M
GC-1351	07/G479	control	M6	12	MRC	39	M
GC-2094	08/G506	control	M6	18	MRC	19	M
GC-3513	09/G204	control	M6	4	MRC	49	M
GC-2153	08/G423	progressor	M6	4	MRC	21	F
GC-0170	07/G225	progressor	BL	19	MRC	17	M
GC-3430	09/G388	control	BL	19	MRC	29	F
GC-5297	09/G391	control	M18	1	MRC	23	F
GC-0553	07/G493	control	BL	15	MRC	35	F
GC-3400	09/G187	control	M6	5	MRC	21	M
GC-2744	07/G370	control	M18	3	MRC	17	M
GC-2344	09/G110	control	BL	24	MRC	24	M
GC-3691	09/G476	control	BL	14	MRC	30	F
GC-1071	08/G424	control	BL	10	MRC	26	F
GC-2202	08/G587	control	M6	4	MRC	55	M
GC-0576	08/G109	control	BL	7	MRC	22	F
GC-0214	07/G255	control	BL	14	MRC	34	M
GC-0025	07/G119	control	BL	15	MRC	26	F
GC-1868	08/G400	control	M6	15	MRC	15	M
GC-3558	09/G252	control	M6	15	MRC	28	M
GC-2237	08/G568	control	M6	15	MRC	24	M
GC-3396	09/G377	control	BL	7	MRC	23	F
GC-3128	09/G143	control	M6	6	MRC	25	F
GC-3289	09/G172	control	M6	0	MRC	18	F
GC-2390	08/G701	control	M6	3	MRC	28	F
GC-1687	08/G715	control	BL	22	MRC	20	F
GC-0287	07/G300	progressor	BL	10	MRC	26	M
GC-3601	09/G202	control	M6	1	MRC	18	F
GC-1479	08/G154	control	M6	1	MRC	18	F
GC-2743	07/G368	control	M18	3	MRC	15	M
GC-1412	08/G606	progressor	BL	22	MRC	21	F
GC-4337	08/G810	control	M18	4	MRC	21	F
GC-5431	09/G445	control	M18	3	MRC	16	M
GC-1249	08/G506	control	BL	24	MRC	19	M
GC-1024	07/G322	control	M6	12	MRC	41	M
GC-4388	09/G477	control	M6	1	MRC	18	F
GC-0618	08/G141	control	BL	12	MRC	19	M
GC-4821	10/G407	progressor	BL	7	MRC	22	F
GC-4946	09/G252	control	M18	3	MRC	28	M
GC-5113	10/G279	progressor	M6	13	MRC	21	F
GC-1965	08/G329	control	M6	4	MRC	24	F
GC-2347	09/G113	control	BL	3	MRC	39	F
GC-4088	08/G762	progressor	M18	3	MRC	23	M
GC-1239	08/G496	control	BL	24	MRC	24	M
GC-2647	09/G179	control	BL	10	MRC	57	M
GC-3629	09/G442	control	BL	21	MRC	16	M
GC-2270	08/G613	control	M6	15	MRC	15	M
GC-2266	08/G596	control	M6	16	MRC	20	F
GC-3424	09/G391	control	BL	19	MRC	23	F
GC-1846	08/G802	control	BL	21	MRC	24	M
GC-1971	08/G372	control	M6	6	MRC	36	F
GC-3888	08/G596	control	M18	4	MRC	20	F
GC-1880	08/G434	control	M6	5	MRC	21	M
GC-3196	09/G340	progressor	BL	6	MRC	28	M
GC-3686	09/G477	control	BL	7	MRC	18	F
GC-0530	07/G475	control	BL	15	MRC	25	F
GC-4518	09/G450	control	M6	0	MRC	16	F
GC-3425	09/G389	control	BL	19	MRC	30	F
GC-3363	09/G162	control	M6	5	MRC	30	M
GC-1777	08/G762	progressor	BL	21	MRC	23	M
GC-2463	09/G143	control	BL	12	MRC	25	F
GC-1389	08/G596	control	BL	22	MRC	20	F
GC-2155	08/G494	progressor	M6	3	MRC	30	F
GC-0737	07/G213	progressor	M6	8	MRC	34	M
GC-1181	07/G411	control	M6	8	MRC	27	M
GC-2345	09/G111	control	BL	3.5	MRC	30	F
GC-4621	10/G139	progressor	M6	15	MRC	17	M
GC-2005	08/G367	progressor	M6	4	MRC	56	M
GC-2728	08/G826	control	M6	1	MRC	24	F
GC-4481	09/G449	control	M6	0	MRC	16	F
GC-1998	08/G828	control	BL	21	MRC	18	M
GC-2452	09/G135	control	BL	11	MRC	26	F
GC-4228	09/G377	control	M6	1	MRC	23	F
GC-1879	08/G433	progressor	M6	18	MRC	26	F
GC-4542	08/G893	control	M18	6	MRC	29	F
GC-1817	08/G782	control	BL	12	MRC	18	M
GC-3445	09/G397	control	BL	14	MRC	35	F
GC-0473	07/G438	progressor	BL	7	MRC	16	M
GC-3636	09/G449	control	BL	6	MRC	16	F
GC-3426	09/G390	control	BL	7	MRC	21	F
GC-1221	08/G493	progressor	BL	8	MRC	37	F
GC-3295	08/G249	progressor	M18	6	MRC	22	M
GC-2008	08/G324	control	M6	18	MRC	35	F
GC-2323	08/G606	progressor	M6	16	MRC	21	F
GC-4260	10/G215	progressor	BL	7	MRC	20	F
GC-3880	08/G613	control	M18	3	MRC	15	M
GC-1560	08/G643	control	BL	9	MRC	22	F
GC-0256	07/G274	control	BL	21	MRC	17	M
GC-0634	08/G154	control	BL	7	MRC	18	F
GC-3616	09/G431	control	BL	21	MRC	16	M
GC-2825	09/G247	control	BL	10	MRC	25	M
GC-3208	08/G198	control	M18	1	MRC	18	F
GC-1823	08/G788	control	BL	12	MRC	18	M
GC-3733	09/G258	control	M6	18	MRC	29	F
GC-4215	09/G391	control	M6	13	MRC	23	F
GC-0259	07/G277	control	BL	4	MRC	20	F
GC-2423	09/G120	control	BL	11	MRC	29	F
GC-5572	10/G279	progressor	M18	1	MRC	21	F
GC-2683	09/G202	control	BL	7	MRC	18	F
GC-2450	09/G133	control	BL	19	MRC	34	F
GC-2264	08/G593	control	M6	18	MRC	22	M
GC-4220	09/G401	control	M6	13	MRC	18	F
GC-2764	07/G274	control	M18	3	MRC	17	M
GC-3799	08/G496	control	M18	6	MRC	24	M
GC-0335	07/G328	control	BL	12	MRC	25	F
GC-2292	08/G541	control	M6	4	MRC	18	F
GC-3995	10/G139	progressor	BL	21	MRC	17	M
GC-0960	08/G367	progressor	BL	10	MRC	56	M
GC-1665	08/G701	control	BL	9	MRC	28	F
GC-1048	08/G415	control	BL	9	MRC	32	F
GC-1686	08/G714	control	BL	8	MRC	44	F
GC-2010	08/G343	control	M6	2	MRC	47	F
GC-0375	07/G359	control	BL	14	MRC	30	M
GC-0212	07/G253	control	BL	19	MRC	16	M
GC-0604	08/G131	control	BL	4	MRC	22	F
GC-3632	09/G445	control	BL	21	MRC	16	M
GC-0472	07/G437	progressor	BL	9	MRC	18	F
GC-2602	07/G225	progressor	M18	1	MRC	17	M
GC-2620	09/G172	control	BL	6	MRC	18	F
GC-2509	08/G762	progressor	M6	15	MRC	23	M
GC-1337	07/G468	progressor	M6	12	MRC	52	M
GC-3798	09/G524	progressor	BL	19	MRC	26	F
GC-0125	07/G197	control	BL	7	MRC	16	M
GC-2418	08/G652	control	M6	4	MRC	51	M
GC-0529	07/G474	control	BL	9	MRC	19	F
