# Supplementary material for: Discovery and validation of a prognostic proteomic signature for tuberculosis progression: A prospective cohort study
Source: PLoS Med. 2019 Apr 16;16(4):e1002781. doi: 10.1371/journal.pmed.1002781 (PMC6467365; doi:10.1371/journal.pmed.1002781)
Supplement: S3 Table — (XLSX) [file pmed.1002781.s009.xlsx]

## Sheet: S3_Data. Protein annotation
S3 Data. Annotation of proteins measured by SOMAScan.
ProteinID	Target	TargetFullName	UniProt	EntrezGeneID	EntrezGeneSymbol
10000-28_3	CRBB2	Beta-crystallin B2	P43320	1415	CRYBB2
10006-25_3	ELK1	ETS domain-containing protein Elk-1	P19419	2002	ELK1
10008-43_3	GUC1A	Guanylyl cyclase-activating protein 1	P43080	2978	GUCA1A
10009-2_3	IRF1	Interferon regulatory factor 1	P10914	3659	IRF1
10011-65_3	OCRL	Inositol polyphosphate 5-phosphatase OCRL-1	Q01968	4952	OCRL
10013-34_3	K0319	Dyslexia-associated protein KIAA0319	Q5VV43	9856	KIAA0319
10014-31_3	SLUG	Zinc finger protein SNAI2	O43623	6591	SNAI2
10015-119_3	KCAB2	Voltage-gated potassium channel subunit beta-2	Q13303	8514	KCNAB2
10021-1_3	SUSD2	Sushi domain-containing protein 2	Q9UGT4	56241	SUSD2
10022-207_3	POLH	DNA polymerase eta	Q9Y253	5429	POLH
10023-32_3	VDR	Vitamin D3 receptor	P11473	7421	VDR
10024-44_3	HOGA1	4-hydroxy-2-oxoglutarate aldolase, mitochondrial	Q86XE5	112817	HOGA1
10025-1_3	DLDH	Dihydrolipoyl dehydrogenase, mitochondrial	P09622	1738	DLD
10030-8_3	MutY homolog	A/G-specific adenine DNA glycosylase	Q9UIF7	4595	MUTYH
10034-16_3	FRK	Tyrosine-protein kinase FRK	P42685	2444	FRK
10035-6_3	DUS4	Dual specificity protein phosphatase 4	Q13115	1846	DUSP4
10036-201_3	ZHX3	Zinc fingers and homeoboxes protein 3	Q9H4I2	23051	ZHX3
10037-98_3	SIG12	Sialic acid-binding Ig-like lectin 12	Q96PQ1	89858	SIGLEC12
10039-32_3	PNP	Purine nucleoside phosphorylase	P00491	4860	PNP
10040-63_3	P73L	Tumor protein 63	Q9H3D4	8626	TP63
10041-3_3	HNF4A	Hepatocyte nuclear factor 4-alpha	P41235	3172	HNF4A
10044-12_3	WN10A	Protein Wnt-10a	Q9GZT5	80326	WNT10A
10045-47_3	CUL3	Cullin-3	Q13618	8452	CUL3
10047-12_3	NCF-2	Neutrophil cytosol factor 2	P19878	4688	NCF2
10048-7_3	PEBB	Core-binding factor subunit beta	Q13951	865	CBFB
10049-112_3	TERF1	Telomeric repeat-binding factor 1	P54274	7013	TERF1
10054-3_3	GAN	Gigaxonin	Q9H2C0	8139	GAN
10058-1_3	RD23A	UV excision repair protein RAD23 homolog A	P54725	5886	RAD23A
10063-10_3	FANCL	E3 ubiquitin-protein ligase FANCL	Q9NW38	55120	FANCL
10070-22_3	PLCG2	1-phosphatidylinositol 4,5-bisphosphate phosphodiesterase gamma-2	P16885	5336	PLCG2
10073-22_3	TYDP1	Tyrosyl-DNA phosphodiesterase 1	Q9NUW8	55775	TDP1
10075-75_3	ACBD6	Acyl-CoA-binding domain-containing protein 6	Q9BR61	84320	ACBD6
10076-1_3	AP4M1	AP-4 complex subunit mu-1	O00189	9179	AP4M1
10078-5_3	BAG3	BAG family molecular chaperone regulator 3	O95817	9531	BAG3
10080-9_3	EI2BA	Translation initiation factor eIF-2B subunit alpha	Q14232	1967	EIF2B1
10081-17_3	SATB2	DNA-binding protein SATB2	Q9UPW6	23314	SATB2
10085-25_3	STAR	Steroidogenic acute regulatory protein, mitochondrial	P49675	6770	STAR
10086-39_3	CBS	Cystathionine beta-synthase	P35520	875	CBS
10087-10_3	Alpha crystallin A chain	Alpha-crystallin A chain	P02489	1409	CRYAA
10088-37_3	APT	Adenine phosphoribosyltransferase	P07741	353	APRT
10089-7_3	ASML	N-acetylserotonin O-methyltransferase-like protein	O95671	8623	ASMTL
10336-3_3	CHIP	E3 ubiquitin-protein ligase CHIP	Q9UNE7	10273	STUB1
10337-83_3	CEBPB	CCAAT/enhancer-binding protein beta	P17676	1051	CEBPB
10339-48_3	NSE	Gamma-enolase	P09104	2026	ENO2
10342-55_3	PIAS4	E3 SUMO-protein ligase PIAS4	Q8N2W9	51588	PIAS4
10344-334_3	IL-10 Ra	Interleukin-10 receptor subunit alpha	Q13651	3587	IL10RA
10346-5_3	STAT3	Signal transducer and activator of transcription 3	P40763	6774	STAT3
10351-51_3	IRF1	Interferon regulatory factor 1	P10914	3659	IRF1
10354-57_3	STAT3	Signal transducer and activator of transcription 3	P40763	6774	STAT3
10358-33_3	Mcl-1	Induced myeloid leukemia cell differentiation protein Mcl-1	Q07820	4170	MCL1
10361-25_3	OAS1	2'-5'-oligoadenylate synthase 1	P00973	4938	OAS1
10362-35_3	c-Myc	Myc proto-oncogene protein	P01106	4609	MYC
10363-13_3	SMAD3	Mothers against decapentaplegic homolog 3	P84022	4088	SMAD3
10364-6_3	SMAD2	Mothers against decapentaplegic homolog 2	Q15796	4087	SMAD2
10365-132_3	IL-23	Interleukin-23	P29460, Q9NPF7	359351561	IL12B IL23A
10366-11_3	PDGFRA	Platelet-derived growth factor receptor alpha	P16234	5156	PDGFRA
10367-26_3	IL-12	Interleukin-12	P29459, P29460	35923593	IL12A IL12B
10367-62_3	IL-12	Interleukin-12	P29459, P29460	35923593	IL12A IL12B
10370-21_3	STAT1	Signal transducer and activator of transcription 1-alpha/beta	P42224	6772	STAT1
10372-18_3	STAT6	Signal transducer and activator of transcription 6	P42226	6778	STAT6
10416-79_3	MT1F	Metallothionein-1F	P04733	4494	MT1F
10419-1_3	SCAR5	Scavenger receptor class A member 5	Q6ZMJ2	286133	SCARA5
10424-31_3	NPDC1	Neural proliferation differentiation and control protein 1	Q9NQX5	56654	NPDC1
10425-3_3	B4GT5	Beta-1,4-galactosyltransferase 5	O43286	9334	B4GALT5
10426-21_3	GOSR2	Golgi SNAP receptor complex member 2	O14653	9570	GOSR2
10427-2_3	KCNE2	Potassium voltage-gated channel subfamily E member 2	Q9Y6J6	9992	KCNE2
10428-1_3	KI2S2	Killer cell immunoglobulin-like receptor 2DS2	P43631	100132285	KIR2DS2
10432-3_3	K1644	Uncharacterized protein KIAA1644	Q3SXP7	85352	KIAA1644
10438-19_3	CSF2R	Granulocyte-macrophage colony-stimulating factor receptor subunit alpha	P15509	1438	CSF2RA
10439-57_3	Alpha-amylase 2B	Alpha-amylase 2B	P19961	280	AMY2B
10440-26_3	ACAM	CXADR-like membrane protein	Q9H6B4	79827	CLMP
10442-1_3	TM190	Transmembrane protein 190	Q8WZ59	147744	TMEM190
10445-20_3	ApoM	Apolipoprotein M	O95445	55937	APOM
10447-18_3	PABP3	Polyadenylate-binding protein 3	Q9H361	5042	PABPC3
10451-11_3	NUCB1	Nucleobindin-1	Q02818	4924	NUCB1
10452-24_3	SYT3	Synaptotagmin-3	Q9BQG1	84258	SYT3
10453-7_3	CEA20	Carcinoembryonic antigen-related cell adhesion molecule 20	Q6UY09	125931	CEACAM20
10454-99_3	DJC16	DnaJ homolog subfamily C member 16	Q9Y2G8	23341	DNAJC16
10455-196_3	IL-31	Interleukin-31	Q6EBC2	386653	IL31
10460-1_3	Chitotriosidase-1	Chitotriosidase-1	Q13231	1118	CHIT1
10461-57_3	CLC14	C-type lectin domain family 14 member A	Q86T13	161198	CLEC14A
10462-14_3	INSL5	Insulin-like peptide INSL5	Q9Y5Q6	10022	INSL5
10463-23_3	Alkaline phosphatase, intestine	Intestinal-type alkaline phosphatase	P09923	248	ALPI
10467-58_3	CTXN3	Cortexin-3	Q4LDR2	613212	CTXN3
10471-25_3	LRRN3	Leucine-rich repeat neuronal protein 3	Q9H3W5	54674	LRRN3
10476-23_3	MCFD2	Multiple coagulation factor deficiency protein 2	Q8NI22	90411	MCFD2
10485-56_3	MAGE-4	Melanoma-associated antigen 4	P43358	4103	MAGEA4
10489-19_3	TCTA	T-cell leukemia translocation-altered gene protein	P57738	6988	TCTA
10490-3_3	RPN1	Dolichyl-diphosphooligosaccharide--protein glycosyltransferase subunit 1	P04843	6184	RPN1
10491-21_3	MPRD	Cation-dependent mannose-6-phosphate receptor	P20645	3482	M6PR
10494-48_3	Procalcitonin	Procalcitonin	P01258	796	CALCA
10497-242_3	COX8A	Cytochrome c oxidase subunit 8A, mitochondrial	P10176	1351	COX8A
10499-1_3	T106A	Transmembrane protein 106A	Q96A25	113277	TMEM106A
10501-3_3	cytochrome c oxidase polypeptide VIa-liver	Cytochrome c oxidase subunit 6A1, mitochondrial	P12074	1337	COX6A1
10502-15_3	PRPC	Salivary acidic proline-rich phosphoprotein 1/2	P02810	5554	PRH1
10504-6_3	F159B	Membrane protein FAM159B	A6NKW6	100132916	FAM159B
10506-53_3	PGRC2	Membrane-associated progesterone receptor component 2	O15173	10424	PGRMC2
10511-10_3	Collagen alpha-3(VI)	Collagen alpha-3(VI) chain	P12111	1293	COL6A3
10512-13_3	IL3RB	Cytokine receptor common subunit beta	P32927	1439	CSF2RB
10513-13_3	CSEN	Calsenilin	Q9Y2W7	30818	KCNIP3
10514-5_3	PGD2 synthase	Prostaglandin-H2 D-isomerase	P41222	5730	PTGDS
10516-53_3	ITM2A	Integral membrane protein 2A	O43736	9452	ITM2A
10518-14_3	TUTLA	Protein turtle homolog A	Q9P2J2	57549	IGSF9
10521-10_3	MXRA8	Matrix-remodeling-associated protein 8	Q9BRK3	54587	MXRA8
10522-167_3	PCDB4	Protocadherin beta-4	Q9Y5E5	56131	PCDHB4
10527-22_3	DHX9	ATP-dependent RNA helicase A	Q08211	1660	DHX9
10529-19_3	ZN358	Zinc finger protein 358	Q9NW07	140467	ZNF358
10533-1_3	PCDA4	Protocadherin alpha-4	Q9UN74	56144	PCDHA4
10534-40_3	PARP	Poly [ADP-ribose] polymerase 1	P09874	142	PARP1
10551-7_3	LAT	Linker for activation of T-cells family member 1	O43561	27040	LAT
10552-88_3	NKG2F	NKG2-F type II integral membrane protein	O43908	8302	KLRC4
10553-8_3	TOIP2	Torsin-1A-interacting protein 2	Q8NFQ8	163590	TOR1AIP2
10554-23_3	BGAL	Beta-galactosidase	P16278	2720	GLB1
10557-6_3	TEX29	Testis-expressed sequence 29 protein	Q8N6K0	121793	TEX29
10558-26_3	PCDH9	Protocadherin-9	Q9HC56	5101	PCDH9
10560-1_3	ITM2C	Integral membrane protein 2C	Q9NQX7	81618	ITM2C
10562-42_3	NETO2	Neuropilin and tolloid-like protein 2	Q8NC67	81831	NETO2
10563-13_3	LYSM3	LysM and putative peptidoglycan-binding domain-containing protein 3	Q7Z3D4	116068	LYSMD3
10565-19_3	SLIK3	SLIT and NTRK-like protein 3	O94933	22865	SLITRK3
10571-14_3	MGAT1	Alpha-1,3-mannosyl-glycoprotein 2-beta-N-acetylglucosaminyltransferase	P26572	4245	MGAT1
10572-65_3	CST8	Cystatin-8	O60676	10047	CST8
10575-31_3	PUF60	Poly(U)-binding-splicing factor PUF60	Q9UHX1	22827	PUF60
10580-14_3	SFTA2	Surfactant-associated protein 2	Q6UW10	389376	SFTA2
10583-1_3	TM108	Transmembrane protein 108	Q6UXF1	66000	TMEM108
10584-7_3	NDUS4	NADH dehydrogenase [ubiquinone] iron-sulfur protein 4, mitochondrial	O43181	4724	NDUFS4
10588-39_3	SIAT9	Lactosylceramide alpha-2,3-sialyltransferase	Q9UNP4	8869	ST3GAL5
10600-24_3	CLGN	Calmegin	O14967	4312	CLGN
10603-1_3	HIS3	Histatin-3	P15516	3347	HTN3
10605-22_3	APMAP	Adipocyte plasma membrane-associated protein	Q9HDC9	57136	APMAP
10606-34_3	TOIP1	Torsin-1A-interacting protein 1	Q5JTV8	26092	TOR1AIP1
10607-4_3	P4HTM	Transmembrane prolyl 4-hydroxylase	Q9NXG6	54681	P4HTM
10608-9_3	HIS1	Histatin-1	P15515	3346	HTN1
10610-8_3	DB134	Beta-defensin 134	Q4QY38	613211	DEFB134
10612-18_3	PLOD3	Procollagen-lysine,2-oxoglutarate 5-dioxygenase 3	O60568	8985	PLOD3
10613-33_3	CASC4	Protein CASC4	Q6P4E1	113201	CASC4
10615-18_3	MYP0	Myelin protein P0	P25189	4359	MPZ
10616-67_3	PDXL2	Podocalyxin-like protein 2	Q9NZ53	50512	PODXL2
10620-21_3	PSP-94	Beta-microseminoprotein	P08118	4477	MSMB
10621-26_3	PRR16	Proline-rich protein 16	Q569H4	51334	PRR16
10622-9_3	FXYD5	FXYD domain-containing ion transport regulator 5	Q96DB9	53827	FXYD5
10624-45_3	ISK13	Serine protease inhibitor Kazal-type 13	Q1W4C9	153218	SPINK13
10626-116_3	SIA7C	Alpha-N-acetylgalactosaminide alpha-2,6-sialyltransferase 3	Q8NDV1	256435	ST6GALNAC3
10627-87_3	APLP2	Amyloid-like protein 2	Q06481	334	APLP2
10630-5_3	HTAI2	Oxidoreductase HTATIP2	Q9BUP3	10553	HTATIP2
10631-9_3	PGRC2	Membrane-associated progesterone receptor component 2	O15173	10424	PGRMC2
10635-33_3	F159B	Membrane protein FAM159B	A6NKW6	100132916	FAM159B
10638-1_3	TINF2	TERF1-interacting nuclear factor 2	Q9BSI4	26277	TINF2
10639-1_3	2DMA	HLA class II histocompatibility antigen, DM alpha chain	P28067	3108	HLA-DMA
10640-9_3	TOIP2	Torsin-1A-interacting protein 2	Q8NFQ8	163590	TOR1AIP2
10647-18_3	ASCC1	Activating signal cointegrator 1 complex subunit 1	Q8N9N2	51008	ASCC1
10655-43_3	CLPB	Caseinolytic peptidase B protein homolog	Q9H078	81570	CLPB
10658-28_3	SC11C	Signal peptidase complex catalytic subunit SEC11C	Q9BY50	90701	SEC11C
10659-49_3	MUC4	Mucin-4 precursor	Q99102	4585	MUC4
10660-33_3	S35B3	Adenosine 3'-phospho 5'-phosphosulfate transporter 2	Q9H1N7	51000	SLC35B3
10661-4_3	TM41B	Transmembrane protein 41B	Q5BJD5	440026	TMEM41B
10663-42_3	INSI1	Insulin-induced gene 1 protein	O15503	3638	INSIG1
10665-30_3	HBG1	Hemoglobin subunit gamma-1	P69891	3047	HBG1
10666-7_3	GNPTG	N-acetylglucosamine-1-phosphotransferase subunit gamma	Q9UJJ9	84572	GNPTG
10667-78_3	CA185	Uncharacterized protein C1orf185	Q5T7R7	284546	C1orf185
10671-67_3	CALY	Neuron-specific vesicular protein calcyon	Q9NYX4	50632	CALY
10672-75_3	SP-B	Pulmonary surfactant-associated protein B	P07988	6439	SFTPB
10675-223_3	TMX2	Thioredoxin-related transmembrane protein 2	Q9Y320	51075	TMX2
10677-9_3	NDUB4	NADH dehydrogenase [ubiquinone] 1 beta subcomplex subunit 4	O95168	4710	NDUFB4
10689-5_3	DB119	Beta-defensin 119	Q8N690	245932	DEFB119
10692-48_3	CR026	Dynactin-associated protein	Q8N1N2	284254	DYNAP
10695-12_3	WF10B	Protein WFDC10B	Q8IUB3	280664	WFDC10B
10696-217_3	LPPRC	Leucine-rich PPR motif-containing protein, mitochondrial	P42704	10128	LRPPRC
10699-52_3	LRP1	Prolow-density lipoprotein receptor-related protein 1	Q07954	4035	LRP1
10700-10_3	IGS11	Immunoglobulin superfamily member 11	Q5DX21	152404	IGSF11
10701-30_3	Cadherin-12	Cadherin-12	P55289	1010	CDH12
10702-1_3	COSA1	Collagen alpha-1(XXVIII) chain	Q2UY09	340267	COL28A1
10704-91_3	LRMP	Lymphoid-restricted membrane protein	Q12912	4033	LRMP
10708-3_3	GON2	Progonadoliberin-2	O43555	2797	GNRH2
10710-23_3	ZPBP2	Zona pellucida-binding protein 2	Q6X784	124626	ZPBP2
10713-151_3	CLM7	CMRF35-like molecule 7	A8K4G0	124599	CD300LB
10716-35_3	PSMD5	26S proteasome non-ATPase regulatory subunit 5	Q16401	5711	PSMD5
10723-41_3	WDR1	WD repeat-containing protein 1	O75083	9948	WDR1
10737-96_3	Serpin B1	Leukocyte elastase inhibitor	P30740	1992	SERPINB1
10748-216_3	PCDB2	Protocadherin beta-2	Q9Y5E7	56133	PCDHB2
10753-31_3	ADAM7	Disintegrin and metalloproteinase domain-containing protein 7	Q9H2U9	8756	ADAM7
10760-107_3	GRIA4	Glutamate receptor 4	P48058	2893	GRIA4
10761-5_3	TMED2	Transmembrane emp24 domain-containing protein 2	Q15363	10959	TMED2
10772-21_3	CGAT2	Chondroitin sulfate N-acetylgalactosaminyltransferase 2	Q8N6G5	55454	CSGALNACT2
10798-4_3	CLM2	CMRF35-like molecule 2	Q496F6	342510	CD300E
10816-150_3	PILRA	Paired immunoglobulin-like type 2 receptor alpha	Q9UKJ1	29992	PILRA
10817-26_3	TO20L	TOMM20-like protein 1	Q6UXN7	387990	TOMM20L
10827-67_3	LIGO3	Leucine-rich repeat and immunoglobulin-like domain-containing nogo receptor-interacting protein 3	P0C6S8	645191	LINGO3
10830-5_3	K0494	EF-hand calcium-binding domain-containing protein 14	O75071	9813	EFCAB14
10832-24_3	B4GT6	Beta-1,4-galactosyltransferase 6	Q9UBX8	9331	B4GALT6
10842-7_3	GCNT4	Beta-1,3-galactosyl-O-glycosyl-glycoprotein beta-1,6-N-acetylglucosaminyltransferase 4	Q9P109	51301	GCNT4
10852-114_3	HNRDL	Heterogeneous nuclear ribonucleoprotein D-like	O14979	9987	HNRNPDL
10872-103_3	SCAR3	Scavenger receptor class A member 3	Q6AZY7	51435	SCARA3
10880-38_3	F163B	Protein FAM163B	P0C2L3	642968	FAM163B
10885-36_3	CF089	Bombesin receptor-activated protein C6orf89	Q6UWU4	221477	C6orf89
10888-4_3	GALT7	N-acetylgalactosaminyltransferase 7	Q86SF2	51809	GALNT7
10889-2_3	MRAP2	Melanocortin-2 receptor accessory protein 2	Q96G30	112609	MRAP2
10890-135_3	LCTL	Lactase-like protein	Q6UWM7	197021	LCTL
10892-8_3	OSMR	Oncostatin-M-specific receptor subunit beta	Q99650	9180	OSMR
10894-25_3	Secretagogin	Secretagogin	O76038	10590	SCGN
10895-28_3	TM11B	Transmembrane protease serine 11B	Q86T26	132724	TMPRSS11B
10900-272_3	STMN2	Stathmin-2	Q93045	11075	STMN2
10901-334_3	ITM2C	Integral membrane protein 2C	Q9NQX7	81618	ITM2C
10902-53_3	APRV1	Retroviral-like aspartic protease 1	Q53RT3	151516	ASPRV1
10903-50_3	STX8	Syntaxin-8	Q9UNK0	9482	STX8
10910-6_3	CEAM4	Carcinoembryonic antigen-related cell adhesion molecule 4	O75871	1089	CEACAM4
10914-4_3	CHIC2	Cysteine-rich hydrophobic domain 2 protein	Q9UKJ5	26511	CHIC2
10916-44_3	PLA2R	Secretory phospholipase A2 receptor	Q13018	22925	PLA2R1
10917-40_3	GBGT2	Guanine nucleotide-binding protein G(I)/G(S)/G(O) subunit gamma-T2	O14610	2793	GNGT2
10928-7_3	IL-1F6	Interleukin-36 alpha	Q9UHA7	27179	IL36A
10933-107_3	CABP8	Calcium-binding protein 8	Q9BXU9	83698	CALN1
10938-13_3	sLFA-3	Lymphocyte function-associated antigen 3	P19256	965	CD58
10943-36_3	WBP1	WW domain-binding protein 1	Q96G27	1650	WBP1
10945-11_3	Syntaxin-6	Syntaxin-6	O43752	10228	STX6
10948-14_3	PLD3	Phospholipase D3	Q8IV08	23646	PLD3
10949-59_3	RLA2	60S acidic ribosomal protein P2	P05387	6181	RPLP2
10953-14_3	CLC2A	C-type lectin domain family 2 member A	Q6UVW9	387836	CLEC2A
10955-4_3	CLC10	C-type lectin domain family 10 member A	Q8IUN9	10462	CLEC10A
10959-125_3	BET1L	BET1-like protein	Q9NYM9	51272	BET1L
10961-15_3	TIG3	Retinoic acid receptor responder protein 3	Q9UL19	5920	RARRES3
10962-46_3	D105A	Beta-defensin 105	Q8NG35	245908	DEFB105A
10970-3_3	NAR3	Ecto-ADP-ribosyltransferase 3	Q13508	419	ART3
10977-55_3	UCMA	Unique cartilage matrix-associated protein	Q8WVF2	221044	UCMA
10978-39_3	SOM2	Growth hormone variant	P01242	2689	GH2
11067-13_3	Osteocalcin	Osteocalcin	P02818	632	BGLAP
11071-1_3	IL-5	Interleukin-5	P05113	3567	IL5
11081-1_3	GPDA	Glycerol-3-phosphate dehydrogenase [NAD(+)], cytoplasmic	P21695	2819	GPD1
11083-23_3	NSE	Gamma-enolase	P09104	2026	ENO2
11089-7_3	IgA	Immunoglobulin A	P01876 P01877	34933494	IGHA1 IGHA2
11094-104_3	LPPL	Eosinophil lysophospholipase	Q05315	1178	CLC
11096-57_3	HEMK2	HemK methyltransferase family member 2	Q9Y5N5	29104	N6AMT1
11098-1_3	PDXK	Pyridoxal kinase	O00764	8566	PDXK
11101-18_3	TLR4	Toll-like receptor 4	O00206	7099	TLR4
11102-22_3	REG4	Regenerating islet-derived protein 4	Q9BYZ8	83998	REG4
11103-24_3	HSP 27	Heat shock protein beta-1	P04792	3315	HSPB1
11104-13_3	YKL-40	Chitinase-3-like protein 1	P36222	1116	CHI3L1
11105-171_3	Alpha enolase	Alpha-enolase	P06733	2023	ENO1
11505-1_3	CD38	ADP-ribosyl cyclase/cyclic ADP-ribose hydrolase 1	P28907	952	CD38
11510-31_3	Apo L1	Apolipoprotein L1	O14791	8542	APOL1
11510-51_3	Apo L1	Apolipoprotein L1	O14791	8542	APOL1
11513-92_3	CD38	ADP-ribosyl cyclase/cyclic ADP-ribose hydrolase 1	P28907	952	CD38
11514-196_3	CD59	CD59 glycoprotein	P13987	966	CD59
11516-7_3	FABPL	Fatty acid-binding protein, liver	P07148	2168	FABP1
2182-54_1	C4b	Complement C4b	P0C0L4 P0C0L5	720721	C4A C4B
2190-55_1	Coagulation Factor XI	Coagulation Factor XI	P03951	2160	F11
2192-63_10	CTACK	C-C motif chemokine 27	Q9Y4X3	10850	CCL27
2201-17_6	Endostatin	Endostatin	P39060	80781	COL18A1
2211-9_6	TIMP-1	Metalloproteinase inhibitor 1	P01033	7076	TIMP1
2212-69_1	tPA	Tissue-type plasminogen activator	P00750	5327	PLAT
2247-20_11	EG-VEGF	Prokineticin-1	P58294	84432	PROK1
2278-61_4	TIMP-2	Metalloproteinase inhibitor 2	P16035	7077	TIMP2
2292-17_4	C9	Complement component C9	P02748	735	C9
2330-2_1	SDF-1	Stromal cell-derived factor 1	P48061	6387	CXCL12
2333-72_1	TGF-b1	Transforming growth factor beta-1	P01137	7040	TGFB1
2358-19_2	VEGF sR3	Vascular endothelial growth factor receptor 3	P35916	2324	FLT4
2381-52_4	C5	Complement C5	P01031	727	C5
2418-55_9	Apo E	Apolipoprotein E	P02649	348	APOE
2421-7_3	BDNF	Brain-derived neurotrophic factor	P23560	627	BDNF
2429-27_4	C8	Complement component C8	P07357,P07358,P07360	731732733	C8A C8B C8G
2431-17_3	Cathepsin G	Cathepsin G	P08311	1511	CTSG
2436-49_4	CXCL16, soluble	C-X-C motif chemokine 16	Q9H2A7	58191	CXCL16
2441-2_4	FGF-10	Fibroblast growth factor 10	O15520	2255	FGF10
2443-10_4	FGF-8B	Fibroblast growth factor 8 isoform B	P55075	2253	FGF8
2447-7_4	GIIE	Group IIE secretory phospholipase A2	Q9NZK7	30814	PLA2G2E
2449-1_4	GV	Calcium-dependent phospholipase A2	P39877	5322	PLA2G5
2455-17_4	IL-12	Interleukin-12	P29459, P29460	35923593	IL12A IL12B
2468-62_3	MIP-3a	C-C motif chemokine 20	P78556	6364	CCL20
2474-54_5	SAP	Serum amyloid P-component	P02743	325	APCS
2475-1_3	SCF sR	Mast/stem cell growth factor receptor Kit	P10721	3815	KIT
2480-58_3	TIMP-3	Metalloproteinase inhibitor 3	P35625	7078	TIMP3
2500-2_3	Angiopoietin-4	Angiopoietin-4	Q9Y264	51378	ANGPT4
2501-51_3	Cadherin E	Cadherin-1	P12830	999	CDH1
2505-49_3	GFRa-3	GDNF family receptor alpha-3	O60609	2676	GFRA3
2514-65_3	Ephrin-B3	Ephrin-B3	Q15768	1949	EFNB3
2515-14_3	GFRa-2	GDNF family receptor alpha-2	O00451	2675	GFRA2
2516-57_3	6Ckine	C-C motif chemokine 21	O00585	6366	CCL21
2524-56_3	HMG-1	High mobility group protein B1	P09429	3146	HMGB1
2526-53_3	OPG	Tumor necrosis factor receptor superfamily member 11B	O00300	4982	TNFRSF11B
2558-51_3	b-Endorphin	Beta-endorphin	P01189	5443	POMC
2567-5_6	Factor I	Complement factor I	P05156	3426	CFI
2570-72_5	IGFBP-2	Insulin-like growth factor-binding protein 2	P18065	3485	IGFBP2
2571-12_3	IGFBP-3	Insulin-like growth factor-binding protein 3	P17936	3486	IGFBP3
2575-5_5	Leptin	Leptin	P41159	3952	LEP
2578-67_2	MCP-1	C-C motif chemokine 2	P13500	6347	CCL2
2579-17_5	MMP-9	Matrix metalloproteinase-9	P14780	4318	MMP9
2580-83_2	Myeloperoxidase	Myeloperoxidase	P05164	4353	MPO
2585-2_5	PRL	Prolactin	P01236	5617	PRL
2590-69_4	ROR1	Tyrosine-protein kinase transmembrane receptor ROR1	Q01973	4919	ROR1
2597-8_3	VEGF	Vascular endothelial growth factor A	P15692	7422	VEGFA
2598-9_3	4-1BB	Tumor necrosis factor receptor superfamily member 9	Q07011	3604	TNFRSF9
2599-51_2	4-1BB ligand	Tumor necrosis factor ligand superfamily member 9	P41273	8744	TNFSF9
2602-2_2	Angiopoietin-2	Angiopoietin-2	O15123	285	ANGPT2
2603-61_2	B7	T-lymphocyte activation antigen CD80	P33681	941	CD80
2605-49_2	CD30	Tumor necrosis factor receptor superfamily member 8	P28908	943	TNFRSF8
2607-54_2	CLF-1/CLC Complex	Cytokine receptor-like factor 1:Cardiotrophin-like cytokine factor 1 Complex	O75462 Q9UBD9	924423529	CRLF1 CLCF1
2609-59_2	Cystatin C	Cystatin-C	P01034	1471	CST3
2611-72_2	Dtk	Tyrosine-protein kinase receptor TYRO3	Q06418	7301	TYRO3
2612-5_2	eIF-5	Eukaryotic translation initiation factor 5	P55010	1983	EIF5
2614-28_2	Ephrin-A4	Ephrin-A4	P52798	1945	EFNA4
2615-60_2	Ephrin-A5	Ephrin-A5	P52803	1946	EFNA5
2616-23_18	ERBB2	Receptor tyrosine-protein kinase erbB-2	P04626	2064	ERBB2
2617-56_35	ERBB3	Receptor tyrosine-protein kinase erbB-3	P21860	2065	ERBB3
2618-10_2	ERBB4	Receptor tyrosine-protein kinase erbB-4	Q15303	2066	ERBB4
2619-72_2	GA733-1 protein	Tumor-associated calcium signal transducer 2	P09758	4070	TACSTD2
2620-4_2	gp130, soluble	Interleukin-6 receptor subunit beta	P40189	3572	IL6ST
2622-18_1	HO-2	Heme oxygenase 2	P30519	3163	HMOX2
2625-53_4	HSP 90a/b	Heat shock protein HSP 90-alpha/beta	P07900 P08238		HSP90AA1 HSP90AB1
2626-3_2	HSP 90a/b	Heat shock protein HSP 90-alpha/beta	P07900 P08238		HSP90AA1 HSP90AB1
2630-12_2	IL-1 R AcP	Interleukin-1 Receptor accessory protein	Q9NPH3	3556	IL1RAP
2631-50_2	IL-10 Rb	Interleukin-10 receptor subunit beta	Q08334	3588	IL10RB
2632-5_2	IL-12 Rb1	Interleukin-12 receptor subunit beta-1	P42701	3594	IL12RB1
2633-52_2	IL-13 Ra1	Interleukin-13 receptor subunit alpha-1	P78552	3597	IL13RA1
2634-2_2	IL-2 sRg	Cytokine receptor common subunit gamma	P31785	3561	IL2RG
2635-61_2	Layilin	Layilin	Q6UX15	143903	LAYN
2636-10_2	Lymphotoxin b R	Tumor necrosis factor receptor superfamily member 3	P36941	4055	LTBR
2637-77_2	Macrophage mannose receptor	Macrophage mannose receptor 1	P22897	4360	MRC1
2638-12_2	M-CSF R	Macrophage colony-stimulating factor 1 receptor	P07333	1436	CSF1R
2640-3_2	MSP R	Macrophage-stimulating protein receptor	Q04912	4486	MST1R
2642-4_1	PAFAH beta subunit	Platelet-activating factor acetylhydrolase IB subunit beta	P68402	5049	PAFAH1B2
2643-57_2	P-Cadherin	Cadherin-3	P22223	1001	CDH3
2644-11_2	PKC-A	Protein kinase C alpha type	P17252	5578	PRKCA
2645-54_1	PKC-Z	Protein kinase C zeta type	Q05513	5590	PRKCZ
2647-66_2	Rab GDP dissociation inhibitor beta	Rab GDP dissociation inhibitor beta	P50395	2665	GDI2
2649-77_2	sICAM-3	Intercellular adhesion molecule 3	P32942	3385	ICAM3
2652-15_1	suPAR	Urokinase plasminogen activator surface receptor	Q03405	5329	PLAUR
2654-19_1	TNF sR-I	Tumor necrosis factor receptor superfamily member 1A	P19438	7132	TNFRSF1A
2658-27_1	TrkC	NT-3 growth factor receptor	Q16288	4916	NTRK3
2665-26_2	BCMA	Tumor necrosis factor receptor superfamily member 17	Q02223	608	TNFRSF17
2666-53_2	Bone proteoglycan II	Decorin	P07585	1634	DCN
2668-70_2	Calpain I	Calpain I	P07384 P04632	823826	CAPN1 CAPNS1
2670-67_4	CK-MM	Creatine kinase M-type	P06732	1158	CKM
2677-1_1	ERBB1	Epidermal growth factor receptor	P00533	1956	EGFR
2681-23_2	HGF	Hepatocyte growth factor	P14210	3082	HGF
2682-68_1	HSP 60	60 kDa heat shock protein, mitochondrial	P10809	3329	HSPD1
2683-1_2	iC3b	Complement C3b, inactivated	P01024	718	C3
2685-21_2	IGFBP-5	Insulin-like growth factor-binding protein 5	P24593	3488	IGFBP5
2686-67_2	IGFBP-6	Insulin-like growth factor-binding protein 6	P24592	3489	IGFBP6
2687-2_1	MIA	Melanoma-derived growth regulatory protein	Q16674	8190	MIA
2692-74_2	NPS-PLA2	Phospholipase A2, membrane associated	P14555	5320	PLA2G2A
2693-20_3	OSM	Oncostatin-M	P13725	5008	OSM
2695-25_1	PECAM-1	Platelet endothelial cell adhesion molecule	P16284	5175	PECAM1
2696-87_2	Persephin	Persephin	O60542	5623	PSPN
2697-7_2	PF-4	Platelet factor 4	P02776	5196	PF4
2700-56_2	Protein S	Vitamin K-dependent protein S	P07225	5627	PROS1
2704-74_1	TACI	Tumor necrosis factor receptor superfamily member 13B	O14836	23495	TNFRSF13B
2705-5_2	TECK	C-C motif chemokine 25	O15444	6370	CCL25
2706-69_2	Thyroxine-Binding Globulin	Thyroxine-Binding Globulin	P05543	6906	SERPINA7
2708-54_2	TNFSF18	Tumor necrosis factor ligand superfamily member 18	Q9UNG2	8995	TNFSF18
2711-6_2	CNTFR alpha	Ciliary neurotrophic factor receptor subunit alpha	P26992	1271	CNTFR
2714-78_2	EMAP-2	Endothelial monocyte-activating polypeptide 2	Q12904	9255	AIMP1
2715-25_2	EPO-R	Erythropoietin receptor	P19235	2057	EPOR
2719-3_4	G-CSF-R	Granulocyte colony-stimulating factor receptor	Q99062	1441	CSF3R
2723-9_2	IL-1F7	Interleukin-37	Q9NZH6	27178	IL37
2728-62_2	Laminin	Laminin	P25391, P07942, P11047	28421739123915	LAMA1 LAMB1 LAMC1
2730-58_2	MICA	MHC class I polypeptide-related sequence A	Q29983	4276	MICA
2731-29_2	NADPH-P450 Oxidoreductase	NADPH--cytochrome P450 reductase	P16435	5447	POR
2732-58_3	NANOG	Homeobox protein NANOG	Q9H9S0	79923	NANOG
2734-49_4	NKp44	Natural cytotoxicity triggering receptor 2	O95944	9436	NCR2
2737-22_2	NovH	Protein NOV homolog	P48745	4856	NOV
2741-22_2	Siglec-6	Sialic acid-binding Ig-like lectin 6	O43699	946	SIGLEC6
2742-68_2	Siglec-7	Sialic acid-binding Ig-like lectin 7	Q9Y286	27036	SIGLEC7
2743-5_2	Sonic Hedgehog	Sonic hedgehog protein	Q15465	6469	SHH
2744-57_2	IgG	Immunoglobulin G	P01857	3500 3501 3502 3503 50802 3535	IGHG1 IGHG2 IGHG3 IGHG4 IGK@ IGL@
2746-56_1	TSLP R	Cytokine receptor-like factor 2	Q9HC73	64109	CRLF2
2747-3_2	ULBP-3	NKG2D ligand 3	Q9BZM4	79465	ULBP3
2748-3_2	Activin A	Inhibin beta A chain	P08476	3624	INHBA
2750-3_2	Apo A-I	Apolipoprotein A-I	P02647	335	APOA1
2751-16_2	Azurocidin	Azurocidin	P20160	566	AZU1
2752-62_2	BMP-14	Growth/differentiation factor 5	P43026	8200	GDF5
2753-2_2	C1q	Complement C1q subcomponent	P02745 P02746 P02747	712713714	C1QA C1QB C1QC
2754-50_2	C3	Complement C3	P01024	718	C3
2755-8_2	C3adesArg	C3a anaphylatoxin des Arginine	P01024	718	C3
2760-2_2	DRR1	Protein FAM107A	O95990	11170	FAM107A
2761-49_2	FGF-18	Fibroblast growth factor 18	O76093	8817	FGF18
2762-30_2	FGF-19	Fibroblast growth factor 19	O95750	9965	FGF19
2763-66_2	FGF-20	Fibroblast growth factor 20	Q9NP95	26281	FGF20
2764-20_2	FGF9	Fibroblast growth factor 9	P31371	2254	FGF9
2765-4_3	GDF-11	Growth/differentiation factor 11	O95390	10220	GDF11
2768-56_2	Hemopexin	Hemopexin	P02790	3263	HPX
2770-51_2	I-309	C-C motif chemokine 1	P22362	6346	CCL1
2771-35_2	IGFBP-1	Insulin-like growth factor-binding protein 1	P08833	3484	IGFBP1
2773-50_2	IL-10	Interleukin-10	P22301	3586	IL10
2774-10_3	IL-16	Interleukin-16	Q14005	3603	IL16
2775-54_2	IL-17F	Interleukin-17F	Q96PD4	112744	IL17F
2778-10_2	IL-22	Interleukin-22	Q9GZX6	50616	IL22
2780-35_2	Lactoferrin	Lactotransferrin	P02788	4057	LTF
2781-63_2	LAG-1	C-C motif chemokine 4-like	Q8NHW4	388372	CCL4L1
2783-18_2	LD78-beta	C-C motif chemokine 3-like 1	P16619	414062	CCL3L1
2785-15_2	MCP-2	C-C motif chemokine 8	P80075	6355	CCL8
2788-55_1	MMP-3	Stromelysin-1	P08254	4314	MMP3
2789-26_2	MMP-7	Matrilysin	P09237	4316	MMP7
2790-54_2	NAP-2	Neutrophil-activating peptide 2	P02775	5473	PPBP
2794-60_2	SOD	Superoxide dismutase [Cu-Zn]	P00441	6647	SOD1
2795-23_3	Alkaline phosphatase, bone	Alkaline phosphatase, tissue-nonspecific isozyme	P05186	249	ALPL
2796-62_2	Fibrinogen	Fibrinogen	P02671 P02675 P02679	224322442266	FGA FGB FGG
2797-56_2	Apo B	Apolipoprotein B	P04114	338	APOB
2805-6_2	ACE2	Angiotensin-converting enzyme 2	Q9BYF1	59272	ACE2
2806-49_2	Activin RIB	Activin receptor type-1B	P36896	91	ACVR1B
2809-25_2	ADAMTS-4	A disintegrin and metalloproteinase with thrombospondin motifs 4	O75173	9507	ADAMTS4
2811-27_1	Angiopoietin-1	Angiopoietin-1	Q15389	284	ANGPT1
2813-11_2	ART	Agouti-related protein	O00253	181	AGRP
2816-50_2	BCAM	Basal Cell Adhesion Molecule	P50895	4059	BCAM
2819-23_2	Cadherin-5	Cadherin-5	P33151	1003	CDH5
2822-56_2	CD97	CD97 antigen	P48960	976	CD97
2823-7_1	COMMD7	COMM domain-containing protein 7	Q86VX2	149951	COMMD7
2826-53_2	EDA	Ectodysplasin-A, secreted form	Q92838	1896	EDA
2827-23_2	Fractalkine/CX3CL-1	Fractalkine	P78423	6376	CX3CL1
2828-82_2	HAI-1	Kunitz-type protease inhibitor 1	O43278	6692	SPINT1
2829-19_2	IL-27	Interleukin-27	Q8NEV9 Q14213	24677810148	IL27 EBI3
2831-29_1	Kallikrein 11	Kallikrein-11	Q9UBX7	11012	KLK11
2833-20_1	Kallikrein 4	Kallikrein-4	Q9Y5K2	9622	KLK4
2834-54_1	kallikrein 8	Kallikrein-8	O60259	11202	KLK8
2835-1_4	Ku70	X-ray repair cross-complementing protein 6	P12956	2547	XRCC6
2837-3_2	Met	Hepatocyte growth factor receptor	P08581	4233	MET
2838-53_1	MMP-17	Matrix metalloproteinase-17	Q9ULZ9	4326	MMP17
2839-2_1	OX40 Ligand	Tumor necrosis factor ligand superfamily member 4	P23510	7292	TNFSF4
2841-13_2	sFRP-3	Secreted frizzled-related protein 3	Q92765	2487	FRZB
2843-13_2	SPINT2	Kunitz-type protease inhibitor 2	O43291	10653	SPINT2
2844-53_2	sTie-1	Tyrosine-protein kinase receptor Tie-1, soluble	P35590	7075	TIE1
2846-24_2	Ubiquitin+1	Ubiquitin+1, truncated mutation for UbB	P62979	6233	RPS27A
2848-2_2	WIF-1	Wnt inhibitory factor 1	Q9Y5W5	11197	WIF1
2849-49_1	AIF1	Allograft inflammatory factor 1	P55008	199	AIF1
2851-63_3	C5a	C5a anaphylatoxin	P01031	727	C5
2853-68_2	CHK1	Serine/threonine-protein kinase Chk1	O14757	1111	CHEK1
2855-49_2	ERK-1	Mitogen-activated protein kinase 3	P27361	5595	MAPK3
2857-70_2	Glucocorticoid receptor	Glucocorticoid receptor	P04150	2908	NR3C1
2858-29_2	Hat1	Histone acetyltransferase type B catalytic subunit	O14929	8520	HAT1
2859-69_2	HDAC8	Histone deacetylase 8	Q9BY41	55869	HDAC8
2860-19_2	Karyopherin-a2	Importin subunit alpha-1	P52292	3838	KPNA2
2864-2_3	MEK1	Dual specificity mitogen-activated protein kinase kinase 1	Q02750	5604	MAP2K1
2865-77_2	MOZ	Histone acetyltransferase KAT6A	Q92794	7994	KAT6A
2867-52_2	PKB a/b/g	Protein kinase B alpha/beta/gamma	P31749 P31751 Q9Y243	20720810000	AKT1 AKT2 AKT3
2869-68_3	PKC-D	Protein kinase C delta type	Q05655	5580	PRKCD
2870-29_2	RAC1	Ras-related C3 botulinum toxin substrate 1	P63000	5879	RAC1
2871-73_2	RAD51	DNA repair protein RAD51 homolog 1	Q06609	5888	RAD51
2875-15_2	TBP	TATA-box-binding protein	P20226	6908	TBP
2876-74_2	Topoisomerase I	DNA topoisomerase 1	P11387	7150	TOP1
2877-3_1	UBC9	SUMO-conjugating enzyme UBC9	P63279	7329	UBE2I
2878-66_2	YES	Tyrosine-protein kinase Yes	P07947	7525	YES1
2879-9_2	a1-Antichymotrypsin	Alpha-1-antichymotrypsin	P01011	12	SERPINA3
2888-49_2	C7	Complement component C7	P10643	730	C7
2889-37_2	Cardiotrophin-1	Cardiotrophin-1	Q16619	1489	CTF1
2890-59_2	CCL28	C-C motif chemokine 28	Q9NRJ3	56477	CCL28
2891-1_3	CD22	B-cell receptor CD22	P20273	933	CD22
2900-53_3	HCC-1	C-C motif chemokine 14	Q16627	6358	CCL14
2906-55_3	IL-4	Interleukin-4	P05112	3565	IL4
2911-27_2	Midkine	Midkine	P21741	4192	MDK
2913-1_2	MPIF-1	C-C motif chemokine 23	P55773	6368	CCL23
2914-65_3	NAP-2	Neutrophil-activating peptide 2	P02775	5473	PPBP
2915-6_2	PCNA	Proliferating cell nuclear antigen	P12004	5111	PCNA
2917-3_2	sRANKL	Tumor necrosis factor ligand superfamily member 11	O14788	8600	TNFSF11
2925-9_1	PAI-1	Plasminogen activator inhibitor 1	P05121	5054	SERPINE1
2937-10_2	Apo E3	Apolipoprotein E (isoform E3)	P02649	348	APOE
2938-55_2	Apo E4	Apolipoprotein E (isoform E4)	P02649	348	APOE
2939-10_2	Artemin	Artemin	Q5T4W7	9048	ARTN
2942-50_2	Cytochrome c	Cytochrome c	P99999	54205	CYCS
2943-5_2	Cytochrome P450 3A4	Cytochrome P450 3A4	P08684	1576	CYP3A4
2944-66_2	DAN	Neuroblastoma suppressor of tumorigenicity 1	P41271	4681	NBL1
2945-25_1	ER	Estrogen receptor	P03372	2099	ESR1
2948-58_2	Growth hormone receptor	Growth hormone receptor	P10912	2690	GHR
2949-6_2	GX	Group 10 secretory phospholipase A2	O15496	8399	PLA2G10
2950-57_2	IGFBP-4	Insulin-like growth factor-binding protein 4	P22692	3487	IGFBP4
2953-31_2	Luteinizing hormone	Luteinizing hormone	P01215, P01229	10813972	CGA LHB
2954-56_2	MMP-8	Neutrophil collagenase	P22894	4317	MMP8
2960-66_2	Properdin	Properdin	P27918	5199	CFP
2961-1_2	Protein C	Vitamin K-dependent protein C	P04070	5624	PROC
2962-50_2	PTHrP	Parathyroid hormone-related protein	P12272	5744	PTHLH
2966-65_2	SCGF-beta	Stem Cell Growth Factor-beta	Q9Y240	6320	CLEC11A
2967-8_1	VCAM-1	Vascular cell adhesion protein 1	P19320	7412	VCAM1
2968-61_1	TNFSF15	Tumor necrosis factor ligand superfamily member 15	O95150	9966	TNFSF15
2969-11_1	ALK-1	Serine/threonine-protein kinase receptor R3	P37023	94	ACVRL1
2970-60_2	AREG	Amphiregulin	P15514	374	AREG
2972-57_2	BMP-7	Bone morphogenetic protein 7	P18075	655	BMP7
2973-15_2	CD36 ANTIGEN	Platelet glycoprotein 4	P16671	948	CD36
2974-61_2	contactin-1	Contactin-1	Q12860	1272	CNTN1
2975-19_2	CTGF	Connective tissue growth factor	P29279	1490	CTGF
2976-58_2	Desmoglein-1	Desmoglein-1	Q02413	1828	DSG1
2977-7_2	EDAR	Tumor necrosis factor receptor superfamily member EDAR	Q9UNE0	10913	EDAR
2979-8_2	ENA-78	C-X-C motif chemokine 5	P42830	6374	CXCL5
2981-9_3	ESAM	Endothelial cell-selective adhesion molecule	Q96AP7	90952	ESAM
2982-82_2	Galectin-4	Galectin-4	P56470	3960	LGALS4
2985-35_1	Gro-a	Growth-regulated alpha protein	P09341	2919	CXCL1
2986-49_2	Gro-b/g	Gro-beta/gamma	P19876 P19875		CXCL3 CXCL2
2987-37_3	Histone H1.2	Histone H1.2	P16403	3006	HIST1H1C
2988-57_2	ICOS	Inducible T-cell costimulator	Q9Y6W8	29851	ICOS
2989-17_2	IFN-g	Interferon gamma	P01579	3458	IFNG
2991-9_2	IL-1 sRI	Interleukin-1 receptor type 1	P14778	3554	IL1R1
2992-59_2	IL-17 sR	Interleukin-17 receptor A	Q96F46	23765	IL17RA
2993-1_2	IL-18 Rb	Interleukin-18 receptor accessory protein	O95256	8807	IL18RAP
2994-71_2	IL-1Rrp2	Interleukin-1 receptor-like 2	Q9HB29	8808	IL1RL2
2997-8_1	JAM-B	Junctional adhesion molecule B	P57087	58494	JAM2
2998-53_2	JAM-C	Junctional adhesion molecule C	Q9BX67	83700	JAM3
2999-6_2	LSAMP	Limbic system-associated membrane protein	Q13449	4045	LSAMP
3000-66_1	MBL	Mannose-binding protein C	P11226	4153	MBL2
3003-29_2	NKp30	Natural cytotoxicity triggering receptor 3	O14931	259197	NCR3
3004-67_2	PD-L2	Programmed cell death 1 ligand 2	Q9BQ51	80380	PDCD1LG2
3007-7_2	Siglec-9	Sialic acid-binding Ig-like lectin 9	Q9Y336	27180	SIGLEC9
3009-3_2	TGF-b R III	Transforming growth factor beta receptor type 3	Q03167	7049	TGFBR3
3010-53_2	TSLP	Thymic stromal lymphopoietin	Q969D9	85480	TSLP
3022-4_2	CTLA-4	Cytotoxic T-lymphocyte protein 4	P16410	1493	CTLA4
3024-18_2	a2-Antiplasmin	Alpha-2-antiplasmin	P08697	5345	SERPINF2
3025-50_1	bFGF	Fibroblast growth factor 2	P09038	2247	FGF2
3026-5_2	Calpastatin	Calpastatin	P20810	831	CAST
3028-36_2	Ck-b-8-1	Ck-beta-8-1	P55773	6368	CCL23
3029-52_2	DC-SIGN	CD209 antigen	Q9NNX6	30835	CD209
3030-3_2	DC-SIGNR	C-type lectin domain family 4 member M	Q9H2X3	10332	CLEC4M
3032-11_2	FSH	Follicle stimulating hormone	P01215, P01225	10812488	CGA FSHB
3033-57_1	Galectin-2	Galectin-2	P05162	3957	LGALS2
3034-1_2	GFAP	Glial fibrillary acidic protein	P14136	2670	GFAP
3035-80_2	IL-19	Interleukin-19	Q9UHD0	29949	IL19
3037-62_1	IL-1b	Interleukin-1 beta	P01584	3553	IL1B
3038-9_2	I-TAC	C-X-C motif chemokine 11	O14625	6373	CXCL11
3040-59_1	MIP-1a	C-C motif chemokine 3	P10147	6348	CCL3
3041-55_2	MRC2	C-type mannose receptor 2	Q9UBG0	9902	MRC2
3042-7_2	Myoglobin	Myoglobin	P02144	4151	MB
3043-49_2	ON	SPARC	P09486	6678	SPARC
3044-3_2	PARC	C-C motif chemokine 18	P55774	6362	CCL18
3045-72_2	PTN	Pleiotrophin	P21246	5764	PTN
3046-31_1	resistin	Resistin	Q9HD89	56729	RETN
3049-61_2	Trypsin	Trypsin-1	P07477	5644	PRSS1
3050-7_2	vWF	von Willebrand factor	P04275	7450	VWF
3052-8_2	Fas ligand, soluble	Tumor necrosis factor ligand superfamily member 6, soluble form	P48023	356	FASLG
3053-49_2	Flt3 ligand	Fms-related tyrosine kinase 3 ligand	P49771	2323	FLT3LG
3054-3_2	Haptoglobin, Mixed Type	Haptoglobin	P00738	3240	HP
3055-54_2	IL-4 sR	Interleukin-4 receptor subunit alpha	P24394	3566	IL4R
3056-11_1	NKG2D	NKG2-D type II integral membrane protein	P26718	22914	KLRK1
3057-55_1	WISP-1	WNT1-inducible-signaling pathway protein 1	O95388	8840	WISP1
3059-50_2	BAFF	Tumor necrosis factor ligand superfamily member 13B	Q9Y275	10673	TNFSF13B
3060-43_2	C9	Complement component C9	P02748	735	C9
3061-61_2	Cathepsin B	Cathepsin B	P07858	1508	CTSB
3065-65_1	FGF-5	Fibroblast growth factor 5	P12034	2250	FGF5
3066-12_1	Galectin-3	Galectin-3	P17931	3958	LGALS3
3067-67_1	GDF-9	Growth/differentiation factor 9	O60383	2661	GDF9
3069-52_3	IgM	Immunoglobulin M	P01871	3.50735e+16	IGHM IGJ IGK@ IGL@
3070-1_2	IL-2	Interleukin-2	P60568	3558	IL2
3072-4_2	IL-13	Interleukin-13	P35225	3596	IL13
3073-51_2	IL-18 BPa	Interleukin-18-binding protein	O95998	10068	IL18BP
3074-6_2	LBP	Lipopolysaccharide-binding protein	P18428	3929	LBP
3077-66_2	Coagulation Factor Xa	Coagulation factor Xa	P00742	2159	F10
3078-1_2	PlGF	Placenta growth factor	P49763	5228	PGF
3079-62_2	TIG2	Retinoic acid receptor responder protein 2	Q99969	5919	RARRES2
3081-70_2	ULBP-1	NKG2D ligand 1	Q9BZM6	80329	ULBP1
3082-9_2	ULBP-2	NKG2D ligand 2	Q9BZM5	80328	ULBP2
3083-71_1	XEDAR	Tumor necrosis factor receptor superfamily member 27	Q9HAV5	60401	EDA2R
3091-70_2	Aurora kinase A	Aurora kinase A	O14965	6790	AURKA
3115-64_2	MK01	Mitogen-activated protein kinase 1	P28482	5594	MAPK1
3122-6_2	SMAC	Diablo homolog, mitochondrial	Q9NR28	56616	DIABLO
3132-1_1	VEGF-C	Vascular endothelial growth factor C	P49767	7424	VEGFC
3143-3_1	sCD4	T-cell surface glycoprotein CD4	P01730	920	CD4
3148-49_1	Gro-b/g	Gro-beta/gamma	P19876 P19875		CXCL3 CXCL2
3151-6_1	IL-2 sRa	Interleukin-2 receptor subunit alpha	P01589	3559	IL2RA
3152-57_1	TNF sR-II	Tumor necrosis factor receptor superfamily member 1B	P20333	7133	TNFRSF1B
3166-92_1	Siglec-3	Myeloid cell surface antigen CD33	P20138	945	CD33
3168-8_2	ADAMTS-5	A disintegrin and metalloproteinase with thrombospondin motifs 5	Q9UNA0	11096	ADAMTS5
3169-70_2	IDUA	alpha-L-iduronidase	P35475	3425	IDUA
3170-6_1	AMPM2	Methionine aminopeptidase 2	P50579	10988	METAP2
3171-57_2	amyloid precursor protein	Amyloid beta A4 protein	P05067	351	APP
3172-28_2	ARSB	Arylsulfatase B	P15848	411	ARSB
3173-49_2	ASAHL	N-acylethanolamine-hydrolyzing acid amidase	Q02083	27163	NAAA
3174-2_1	ATS1	A disintegrin and metalloproteinase with thrombospondin motifs 1	Q9UHI8	9510	ADAMTS1
3175-51_5	ATS13	A disintegrin and metalloproteinase with thrombospondin motifs 13	Q76LX8	11093	ADAMTS13
3177-49_2	Carbonic Anhydrase IV	Carbonic anhydrase 4	P22748	762	CA4
3178-5_2	CATC	Dipeptidyl peptidase 1	P53634	1075	CTSC
3179-51_2	Cathepsin A	Lysosomal protective protein	P10619	5476	CTSA
3181-50_2	Cathepsin S	Cathepsin S	P25774	1520	CTSS
3182-38_2	CD39	Ectonucleoside triphosphate diphosphohydrolase 1	P49961	953	ENTPD1
3184-25_2	Coagulation Factor VII	Coagulation Factor VII	P08709	2155	F7
3186-2_2	C2	Complement C2	P06681	717	C2
3187-52_2	CRIS3	Cysteine-rich secretory protein 3	P54108	10321	CRISP3
3189-61_2	Enterokinase	Enteropeptidase	P98073	5651	TMPRSS15
3191-50_2	WFKN1	WAP, kazal, immunoglobulin, kunitz and NTR domain-containing protein 1	Q96NZ8	117166	WFIKKN1
3192-3_2	Glutamate carboxypeptidase	Cytosolic non-specific dipeptidase	Q96KP4	55748	CNDP2
3194-36_2	GPVI	Platelet glycoprotein VI	Q9HCN6	51206	GP6
3195-50_2	Granulysin	Granulysin	P22749	10578	GNLY
3196-6_2	HPLN1	Hyaluronan and proteoglycan link protein 1	P10915	1404	HAPLN1
3197-70_2	IDE	Insulin-degrading enzyme	P14735	3416	IDE
3198-4_1	IDS	Iduronate 2-sulfatase	P22304	3423	IDS
3199-54_2	kallikrein 12	Kallikrein-12	Q9UKR0	43849	KLK12
3200-49_2	kallikrein 13	Kallikrein-13	Q9UKR3	26085	KLK13
3201-49_2	kallikrein 5	Kallikrein-5	Q9Y337	25818	KLK5
3204-2_2	LKHA4	Leukotriene A-4 hydrolase	P09960	4048	LTA4H
3206-4_2	LYVE1	Lymphatic vessel endothelial hyaluronic acid receptor 1	Q9Y5Y7	10894	LYVE1
3208-2_4	MATN3	Matrilin-3	O15232	4148	MATN3
3209-69_1	MEPE	Matrix extracellular phosphoglycoprotein	Q9NQ76	56955	MEPE
3210-1_2	METAP1	Methionine aminopeptidase 1	P53582	23173	METAP1
3212-30_3	ASAH2	Neutral ceramidase	Q9NR71	56624	ASAH2
3213-65_2	Nidogen	Nidogen-1	P14543	4811	NID1
3214-3_2	NRP1	Neuropilin-1	O14786	8829	NRP1
3216-2_2	PIGR	Polymeric immunoglobulin receptor	P01833	5284	PIGR
3217-74_2	Protease nexin I	Glia-derived nexin	P07093	5270	SERPINE2
3218-8_2	PSMA	Glutamate carboxypeptidase 2	Q04609	2346	FOLH1
3220-40_2	RET	Proto-oncogene tyrosine-protein kinase receptor Ret	P07949	5979	RET
3221-54_1	SARP-2	Secreted frizzled-related protein 1	Q8N474	6422	SFRP1
3222-11_2	Semaphorin 3A	Semaphorin-3A	Q14563	10371	SEMA3A
3232-28_2	TrATPase	Tartrate-resistant acid phosphatase type 5	P13686	54	ACP5
3234-23_2	URB	Coiled-coil domain-containing protein 80	Q76M96	151887	CCDC80
3235-50_2	WFKN2	WAP, Kazal, immunoglobulin, Kunitz and NTR domain-containing protein 2	Q8TEU8	124857	WFIKKN2
3236-12_2	GSK-3 alpha/beta	Glycogen synthase kinase-3 alpha/beta	P49840 P49841	29312932	GSK3A GSK3B
3280-49_2	Aggrecan	Aggrecan core protein	P16112	176	ACAN
3281-19_1	ANGL3	Angiopoietin-related protein 3	Q9Y5C1	27329	ANGPTL3
3283-21_1	BGH3	Transforming growth factor-beta-induced protein ig-h3	Q15582	7045	TGFBI
3284-75_1	BGN	Biglycan	P21810	633	BGN
3285-23_2	C1r	Complement C1r subcomponent	P00736	715	C1R
3289-19_2	Carbonic Anhydrase X	Carbonic anhydrase-related protein 10	Q9NS85	56934	CA10
3290-50_2	CD109	CD109 antigen	Q6YHK3	135228	CD109
3291-30_2	CD23	Low affinity immunoglobulin epsilon Fc receptor	P06734	2208	FCER2
3292-75_1	CD48	CD48 antigen	P09326	962	CD48
3293-2_4	CD5L	CD5 antigen-like	O43866	922	CD5L
3294-55_2	CFC1	Cryptic protein	P0CG37	55997	CFC1
3296-92_2	CNTN2	Contactin-2	Q02246	6900	CNTN2
3298-52_2	Contactin-4	Contactin-4	Q8IWV2	152330	CNTN4
3299-29_2	Contactin-5	Contactin-5	O94779	53942	CNTN5
3302-58_1	CYTF	Cystatin-F	O76096	8530	CST7
3303-23_2	Cystatin M	Cystatin-M	Q15828	1474	CST6
3305-6_1	DLL4	Delta-like protein 4	Q9NR61	54567	DLL4
3309-2_2	FCG2A/B	Low affinity immunoglobulin gamma Fc region receptor II-a/b	P12318 P31994		FCGR2A FCGR2B
3310-62_1	FCG2A/B	Low affinity immunoglobulin gamma Fc region receptor II-a/b	P12318 P31994		FCGR2A FCGR2B
3311-27_1	FCG3B	Low affinity immunoglobulin gamma Fc region receptor III-B	O75015	2215	FCGR3B
3312-64_1	FCGR1	High affinity immunoglobulin gamma Fc receptor I	P12314	2209	FCGR1A
3313-21_2	FCN2	Ficolin-2	Q15485	2220	FCN2
3314-74_2	GFRa-1	GDNF family receptor alpha-1	P56159	2674	GFRA1
3315-15_1	GPC2	Glypican-2	Q8N158	221914	GPC2
3316-58_1	Heparin cofactor II	Heparin cofactor 2	P05546	3053	SERPIND1
3317-33_1	HTRA2	Serine protease HTRA2, mitochondrial	O43464	27429	HTRA2
3320-49_2	IGFBP-7	Insulin-like growth factor-binding protein 7	Q16270	3490	IGFBP7
3321-2_2	IL24	Interleukin-24	Q13007	11009	IL24
3322-52_2	LRIG3	Leucine-rich repeats and immunoglobulin-like domains protein 3	Q6UXM1	121227	LRIG3
3323-37_1	LRP8	Low-density lipoprotein receptor-related protein 8	Q14114	7804	LRP8
3324-51_1	LY9	T-lymphocyte surface antigen Ly-9	Q9HBG7	4063	LY9
3325-2_2	MATN2	Matrilin-2	O00339	4147	MATN2
3326-58_2	Nectin-like protein 2	Cell adhesion molecule 1	Q9BY67	23705	CADM1
3327-27_1	NET4	Netrin-4	Q9HB63	59277	NTN4
3329-14_2	PGRP-S	Peptidoglycan recognition protein 1	O75594	8993	PGLYRP1
3331-8_1	RGMB	RGM domain family member B	Q6NW40	285704	RGMB
3332-57_1	RGM-C	Hemojuvelin	Q6ZVN8	148738	HFE2
3336-50_1	TFPI	Tissue factor pathway inhibitor	P10646	7035	TFPI
3339-33_1	TSP2	Thrombospondin-2	P35442	7058	THBS2
3340-53_1	TSP4	Thrombospondin-4	P35443	7060	THBS4
3341-33_4	ABL1	Tyrosine-protein kinase ABL1	P00519	25	ABL1
3342-76_4	ABL2	Abelson tyrosine-protein kinase 2	P42684	27	ABL2
3343-1_4	Aminoacylase-1	Aminoacylase-1	Q03154	95	ACY1
3344-60_4	Antithrombin III	Antithrombin-III	P01008	462	SERPINC1
3346-72_2	AURKB	Aurora kinase B	Q96GD4	9212	AURKB
3347-9_2	BARK1	beta-adrenergic receptor kinase 1	P25098	156	ADRBK1
3348-49_2	BMP-1	Bone morphogenetic protein 1	P13497	649	BMP1
3350-53_2	CAMK2A	Calcium/calmodulin-dependent protein kinase type II subunit alpha	Q9UQM7	815	CAMK2A
3351-1_1	CAMK2B	Calcium/calmodulin-dependent protein kinase type II subunit beta	Q13554	816	CAMK2B
3352-80_3	Carbonic anhydrase 6	Carbonic anhydrase 6	P23280	765	CA6
3356-50_1	Carbonic anhydrase VII	Carbonic anhydrase 7	P43166	766	CA7
3357-67_2	CDK2/cyclin A	Cyclin-dependent kinase 2:Cyclin-A2 complex	P24941 P20248	1017890	CDK2 CCNA2
3358-51_2	CDK5/p35	Cyclin-dependent kinase 5:Cyclin-dependent kinase 5 activator 1 complex	Q00535 Q15078	10208851	CDK5 CDK5R1
3359-11_2	CDK8/cyclin C	Cyclin-dependent kinase 8:Cyclin-C complex	P49336 P24863	1024892	CDK8 CCNC
3360-50_4	Chk2	Serine/threonine-protein kinase Chk2	O96017	11200	CHEK2
3361-26_2	CLC4K	C-type lectin domain family 4 member K	Q9UJ71	50489	CD207
3362-61_2	CRDL1	Chordin-like protein 1	Q9BU40	91851	CHRDL1
3363-31_4	CSK	Tyrosine-protein kinase CSK	P41240	1445	CSK
3364-76_2	Cathepsin V	Cathepsin L2	O60911	1515	CTSV
3365-7_2	Dkk-4	Dickkopf-related protein 4	Q9UBT3	27121	DKK4
3366-51_2	ECM1	Extracellular matrix protein 1	Q16610	1893	ECM1
3367-8_3	FETUB	Fetuin-B	Q9UGM5	26998	FETUB
3373-5_2	Granzyme H	Granzyme H	P20718	2999	GZMH
3374-49_2	HCK	Tyrosine-protein kinase HCK	P08631	3055	HCK
3376-49_2	IL-17 RD	Interleukin-17 receptor D	Q8NFM7	54756	IL17RD
3378-49_2	Kallikrein 7	Kallikrein-7	P49862	5650	KLK7
3379-29_1	KPCI	Protein kinase C iota type	P41743	5584	PRKCI
3381-24_2	LYNB	Tyrosine-protein kinase Lyn, isoform B	P07948	4067	LYN
3387-1_2	PAK3	Serine/threonine-protein kinase PAK 3	O75914	5063	PAK3
3388-58_2	PAK7	Serine/threonine-protein kinase PAK 7	Q9P286	57144	PAK7
3389-7_2	PCI	Plasma serine protease inhibitor	P05154	5104	SERPINA5
3390-72_2	PIK3CA/PIK3R1	Phosphatidylinositol 4,5-bisphosphate 3-kinase catalytic subunit alpha isoform:Phosphatidylinositol 3-kinase regulatory subunit alpha complex	P42336 P27986	52905295	PIK3CA PIK3R1
3391-10_2	PK3CG	Phosphatidylinositol 4,5-bisphosphate 3-kinase catalytic subunit gamma isoform	P48736	5294	PIK3CG
3392-68_2	PKB a/b/g	Protein kinase B alpha/beta/gamma	P31749 P31751 Q9Y243	20720810000	AKT1 AKT2 AKT3
3394-81_2	PLK-1	Serine/threonine-protein kinase PLK1	P53350	5347	PLK1
3396-54_2	Renin	Renin	P00797	5972	REN
3397-7_4	SHP-2	Tyrosine-protein phosphatase non-receptor type 11	Q06124	5781	PTPN11
3399-31_2	STAB2	Stabilin-2	Q8WWQ8	55576	STAB2
3400-49_2	TBK1	Serine/threonine-protein kinase TBK1	Q9UHD2	29110	TBK1
3401-8_2	TCPTP	Tyrosine-protein phosphatase non-receptor type 2	P17706	5771	PTPN2
3403-1_2	TPSB2	Tryptase beta-2	P20231	64499	TPSB2
3404-51_2	TPSG1	Tryptase gamma	Q9NRR2	25823	TPSG1
3405-6_2	UFC1	Ubiquitin-fold modifier-conjugating enzyme 1	Q9Y3C8	51506	UFC1
3412-7_1	Bcl-2	Apoptosis regulator Bcl-2	P10415	596	BCL2
3413-50_2	BFL1	Bcl-2-related protein A1	Q16548	597	BCL2A1
3414-40_2	BMX	Cytoplasmic tyrosine-protein kinase BMX	P51813	660	BMX
3415-61_2	BSP	Bone sialoprotein 2	P21815	3381	IBSP
3416-2_2	BTK	Tyrosine-protein kinase BTK	Q06187	695	BTK
3418-12_2	CAMK1D	Calcium/calmodulin-dependent protein kinase type 1D	Q8IU85	57118	CAMK1D
3419-49_2	CAMK2D	Calcium/calmodulin-dependent protein kinase type II subunit delta	Q13557	817	CAMK2D
3420-21_2	Carbonic anhydrase XIII	Carbonic anhydrase 13	Q8N1Q1	377677	CA13
3421-54_2	CD30 Ligand	Tumor necrosis factor ligand superfamily member 8	P32971	944	TNFSF8
3422-4_2	CDK1/cyclin B	Cyclin-dependent kinase 1:G2/mitotic-specific cyclin-B1 complex	P06493 P14635	983891	CDC2 CCNB1
3423-59_2	Chymase	Chymase	P23946	1215	CMA1
3427-63_2	CSK21	Casein kinase II subunit alpha	P68400	1457	CSNK2A1
3431-54_2	EphA1	Ephrin type-A receptor 1	P21709	2041	EPHA1
3432-21_2	EPHA3	Ephrin type-A receptor 3	P29320	2042	EPHA3
3434-34_1	FN1.3	Fibronectin Fragment 3	P02751	2335	FN1
3435-53_2	FN1.4	Fibronectin Fragment 4	P02751	2335	FN1
3437-80_3	Flt-3	Receptor-type tyrosine-protein kinase FLT3	P36888	2322	FLT3
3438-10_2	FSTL3	Follistatin-related protein 3	O95633	10272	FSTL3
3440-7_2	granzyme A	Granzyme A	P12544	3001	GZMA
3441-64_2	GSK-3 alpha/beta	Glycogen synthase kinase-3 alpha/beta	P49840 P49841	29312932	GSK3A GSK3B
3443-61_2	HIPK3	Homeodomain-interacting protein kinase 3	Q9H422	10114	HIPK3
3445-53_2	IL-15 Ra	Interleukin-15 receptor subunit alpha	Q13261	3601	IL15RA
3446-7_2	IL-18 Ra	Interleukin-18 receptor 1	Q13478	8809	IL18R1
3447-64_2	IL-8	Interleukin-8	P10145	3576	CXCL8
3448-13_2	IR	Insulin receptor	P06213	3643	INSR
3449-58_2	Kallistatin	Kallistatin	P29622	5267	SERPINA4
3452-17_2	LCK	Tyrosine-protein kinase Lck	P06239	3932	LCK
3453-87_2	LYN	Tyrosine-protein kinase Lyn	P07948	4067	LYN
3457-57_1	Periostin	Periostin	Q15063	10631	POSTN
3459-49_2	PDGF Rb	Platelet-derived growth factor receptor beta	P09619	5159	PDGFRB
3461-58_1	PGCB	Brevican core protein	Q96GW7	63827	BCAN
3466-8_2	PRKACA	cAMP-dependent protein kinase catalytic subunit alpha	P17612	5566	PRKACA
3469-74_1	RPS6KA3	Ribosomal protein S6 kinase alpha-3	P51812	6197	RPS6KA3
3470-1_2	sE-Selectin	E-Selectin	P16581	6401	SELE
3471-49_1	STK16	Serine/threonine-protein kinase 16	O75716	8576	STK16
3472-40_2	Survivin	Baculoviral IAP repeat-containing protein 5	O15392	332	BIRC5
3473-78_2	Thrombopoietin Receptor	Thrombopoietin Receptor	P40238	4352	MPL
3474-19_2	Thrombospondin-1	Thrombospondin-1	P07996	7057	THBS1
3477-63_2	TrkA	High affinity nerve growth factor receptor	P04629	4914	NTRK1
3479-71_2	TRY3	Trypsin-3	P35030	5646	PRSS3
3480-7_1	DUS3	Dual specificity protein phosphatase 3	P51452	1845	DUSP3
3481-87_1	XPNPEP1	Xaa-Pro aminopeptidase 1	Q9NQW7	7511	XPNPEP1
3484-60_2	Angiotensinogen	Angiotensinogen	P01019	183	AGT
3485-28_2	b2-Microglobulin	Beta-2-microglobulin	P61769	567	B2M
3486-58_2	b-ECGF	Fibroblast growth factor 1	P05230	2246	FGF1
3487-32_2	BLC	C-X-C motif chemokine 13	O43927	10563	CXCL13
3488-64_2	Catalase	Catalase	P04040	847	CAT
3489-9_2	CNTF	Ciliary Neurotrophic Factor	P26441	1270	CNTF
3494-71_3	FGF-17	Fibroblast growth factor 17	O60258	8822	FGF17
3495-15_2	GCP-2	C-X-C motif chemokine 6	P80162	6372	CXCL6
3497-13_2	IFN-aA	Interferon alpha-2	P01563	3440	IFNA2
3498-53_2	IL-17	Interleukin-17A	Q16552	3605	IL17A
3499-77_2	IL-17B	Interleukin-17B	Q9UHF5	27190	IL17B
3503-4_2	Integrin a1b1	Integrin alpha-I: beta-1 complex	P56199, P05556	36723688	ITGA1 ITGB1
3504-58_2	LEAP-1	Hepcidin	P81172	57817	HAMP
3505-6_2	Lymphotoxin a1/b2	Lymphotoxin alpha1:beta2	P01374, Q06643	40494050	LTA LTB
3506-49_1	Lymphotoxin a2/b1	Lymphotoxin alpha2:beta1	P01374, Q06643	40494050	LTA LTB
3508-78_3	MDC	C-C motif chemokine 22	O00626	6367	CCL22
3509-1_1	MIP-5	C-C motif chemokine 15	Q16663	6359	CCL15
3514-49_2	Proteinase-3	Myeloblastin	P24158	5657	PRTN3
3516-60_2	SDF-1	Stromal cell-derived factor 1	P48061	6387	CXCL12
3518-54_2	TAFI	Carboxypeptidase B2	Q96IY4	1361	CPB2
3519-3_2	TARC	C-C motif chemokine 17	Q92583	6361	CCL17
3520-58_1	TGF-b3	Transforming growth factor beta-3	P10600	7043	TGFB3
3521-16_2	TSH	Thyroid Stimulating Hormone	P01215 P01222	108112372	CGA TSHB
3522-57_1	Vasoactive Intestinal Peptide	Vasoactive Intestinal Peptide	P01282	7432	VIP
3534-14_2	CD40 ligand, soluble	CD40 ligand	P29965	959	CD40LG
3535-84_1	DKK1	Dickkopf-related protein 1	O94907	22943	DKK1
3538-26_1	dopa decarboxylase	Aromatic-L-amino-acid decarboxylase	P20711	1644	DDC
3554-24_1	Adiponectin	Adiponectin	Q15848	9370	ADIPOQ
3580-25_8	a1-Antitrypsin	Alpha-1-antitrypsin	P01009	5265	SERPINA1
3581-53_3	a2-HS-Glycoprotein	Alpha-2-HS-glycoprotein	P02765	197	AHSG
3583-54_4	Arylsulfatase A	Arylsulfatase A	P15289	410	ARSA
3585-54_4	BASI	Basigin	P35613	682	BSG
3587-53_2	BMP10	Bone morphogenetic protein 10	O95393	27302	BMP10
3590-8_3	C1s	Complement C1s subcomponent	P09871	716	C1S
3591-51_3	Cadherin-6	Cadherin-6	P55285	1004	CDH6
3592-4_3	CAMK1	Calcium/calmodulin-dependent protein kinase type 1	Q14012	8536	CAMK1
3593-72_3	Caspase-3	Caspase-3	P42574	836	CASP3
3594-6_5	CATE	Cathepsin E	P14091	1510	CTSE
3600-2_3	Chitotriosidase-1	Chitotriosidase-1	Q13231	1118	CHIT1
3601-54_3	CHL1	Neural cell adhesion molecule L1-like protein	O00533	10752	CHL1
3603-60_5	CLC7A	C-type lectin domain family 7 member A	Q9BXN2	64581	CLEC7A
3605-77_4	MASP3	Mannan-binding lectin serine protease 1	P48740	5648	MASP1
3606-2_5	Discoidin domain receptor 2	Discoidin domain-containing receptor 2	Q16832	4921	DDR2
3607-71_1	DKK3	Dickkopf-related protein 3	Q9UBP4	27122	DKK3
3608-12_5	DPP2	Dipeptidyl peptidase 2	Q9UHL4	29952	DPP7
3611-70_4	Endothelin-converting enzyme 1	Endothelin-converting enzyme 1	P42892	1889	ECE1
3612-6_4	EphB4	Ephrin type-B receptor 4	P54760	2050	EPHB4
3613-62_5	FCN1	Ficolin-1	O00602	2219	FCN1
3616-3_5	GNS	N-acetylglucosamine-6-sulfatase	P15586	2799	GNS
3617-80_4	HGFA	Hepatocyte growth factor activator	Q04756	3083	HGFAC
3620-67_2	IL22RA1	Interleukin-22 receptor subunit alpha-1	Q8N6P7	58985	IL22RA1
3622-33_4	LGMN	Legumain	Q99538	5641	LGMN
3623-84_4	LY86	Lymphocyte antigen 86	O95711	9450	LY86
3624-3_4	Marapsin	Serine protease 27	Q9BQR3	83886	PRSS27
3627-71_4	MMEL2	Membrane metallo-endopeptidase-like 1	Q495T6	79258	MMEL1
3628-3_4	MP2K2	Dual specificity mitogen-activated protein kinase kinase 2	P36507	5605	MAP2K2
3629-60_4	MRCKB	Serine/threonine-protein kinase MRCK beta	Q9Y5S2	9578	CDC42BPB
3630-27_4	Nectin-like protein 1	Cell adhesion molecule 3	Q8N126	57863	CADM3
3633-70_5	NID2	Nidogen-2	Q14112	22795	NID2
3634-5_4	OBCAM	Opioid-binding protein/cell adhesion molecule	Q14982	4978	OPCML
3635-76_4	OCAD1	OCIA domain-containing protein 1	Q9NX40	54940	OCIAD1
3636-37_4	OLR1	Oxidized low-density lipoprotein receptor 1	P78380	4973	OLR1
3640-14_3	RAP	alpha-2-macroglobulin receptor-associated protein	P30533	4043	LRPAP1
3642-4_1	SLAF5	SLAM family member 5	Q9UIB8	8832	CD84
3643-90_2	SLIK1	SLIT and NTRK-like protein 1	Q96PX8	114798	SLITRK1
3644-5_4	Soggy-1	Dickkopf-like protein 1	Q9UK85	27120	DKKL1
3646-7_4	TEC	Tyrosine-protein kinase Tec	P42680	7006	TEC
3647-49_4	TLR4:MD-2 complex	Toll-like receptor 4:Lymphocyte antigen 96 complex	O00206 Q9Y6Y9	709923643	TLR4 LY96
3651-50_5	VEGF sR2	Vascular endothelial growth factor receptor 2	P35968	3791	KDR
3654-27_4	BMPER	BMP-binding endothelial regulator protein	Q8N8U9	168667	BMPER
3656-9_1	Cadherin-12	Cadherin-12	P55289	1010	CDH12
3657-74_3	Calcineurin B a	Calcineurin subunit B type 1	P63098	5534	PPP3R1
3666-17_4	complement factor H-related 5	Complement factor H-related protein 5	Q9BXR6	81494	CFHR5
3676-15_3	IGF-II receptor	Cation-independent mannose-6-phosphate receptor	P11717	3482	IGF2R
3681-87_3	kallikrein 14	Kallikrein-14	Q9P0G3	43847	KLK14
3684-78_3	Macrophage scavenger receptor	Macrophage scavenger receptor types I and II	P21757	4481	MSR1
3685-53_1	MFRP	Membrane frizzled-related protein	Q9BY79	83552	MFRP
3700-15_4	IgG	Immunoglobulin G	P01857	3500 3501 3502 3503 50802 3535	IGHG1 IGHG2 IGHG3 IGHG4 IGK@ IGL@
3707-12_2	Albumin	Serum albumin	P02768	213	ALB
3708-62_1	a2-Macroglobulin	Alpha-2-macroglobulin	P01023	2	A2M
3709-4_2	ALT	Alanine aminotransferase 1	P24298	2875	GPT
3710-49_2	Angiostatin	Angiostatin	P00747	5340	PLG
3714-49_2	CK-MB	Creatine kinase M-type:Creatine kinase B-type heterodimer	P12277 P06732	11521158	CKB CKM
3719-2_2	p27Kip1	Cyclin-dependent kinase inhibitor 1B	P46527	1027	CDKN1B
3723-1_2	BNP-32	Brain natriuretic peptide 32	P16860	4879	NPPB
3727-35_1	PYY	Peptide YY	P10082	5697	PYY
3728-52_2	Secretin	Secretin	P09683	6343	SCT
3730-81_2	TNR4	Tumor necrosis factor receptor superfamily member 4	P43489	7293	TNFRSF4
3736-60_3	BMP-6	Bone morphogenetic protein 6	P22004	654	BMP6
3737-6_3	Cathepsin H	Cathepsin H	P09668	1512	CTSH
3738-54_4	CSF-1	Macrophage colony-stimulating factor 1	P09603	1435	CSF1
3739-72_4	gpIIbIIIa	Integrin alpha-IIb: beta-3 complex	P08514 P05106	3674 3690	ITGA2B ITGB3
3741-4_3	IL-5	Interleukin-5	P05113	3567	IL5
3743-1_2	MMP-10	Stromelysin-2	P09238	4319	MMP10
3758-63_3	Activated Protein C	Activated Protein C	P04070	5624	PROC
3758-68_3	Activated Protein C	Activated Protein C	P04070	5624	PROC
3761-4_2	COX-2	Prostaglandin G/H synthase 2	P35354	5743	PTGS2
3766-51_4	STX1a	Syntaxin-1A	Q16623	6804	STX1A
3773-15_4	sTie-2	Angiopoietin-1 receptor, soluble	Q02763	7010	TEK
3795-6_2	ADAM 9	Disintegrin and metalloproteinase domain-containing protein 9	Q13443	8754	ADAM9
3796-79_2	ANGL4	Angiopoietin-related protein 4	Q9BY76	51129	ANGPTL4
3797-1_1	Cadherin-2	Cadherin-2	P19022	1000	CDH2
3798-71_1	Carbonic anhydrase 9	Carbonic anhydrase 9	Q16790	768	CA9
3799-11_2	Carbonic anhydrase III	Carbonic anhydrase 3	P07451	761	CA3
3800-71_2	CK-BB	Creatine kinase B-type	P12277	1152	CKB
3802-50_1	Cystatin-S	Cystatin-S	P01036	1472	CST4
3803-10_2	CYTD	Cystatin-D	P28325	1473	CST5
3805-16_2	Endocan	Endothelial cell-specific molecule 1	Q9NQ30	11082	ESM1
3806-55_1	EphA5	Ephrin type-A receptor 5	P54756	2044	EPHA5
3807-1_2	FGF23	Fibroblast growth factor 23	Q9GZV9	8074	FGF23
3808-76_2	FGFR-2	Fibroblast growth factor receptor 2	P21802	2263	FGFR2
3809-1_2	FGFR-3	Fibroblast growth factor receptor 3	P22607	2261	FGFR3
3810-50_2	FGR	Tyrosine-protein kinase Fgr	P09769	2268	FGR
3813-3_2	FYN	Tyrosine-protein kinase Fyn	P06241	2534	FYN
3814-63_1	IL-11 RA	Interleukin-11 receptor subunit alpha	Q14626	3590	IL11RA
3815-14_1	IL-12 RB2	Interleukin-12 receptor subunit beta-2	Q99665	3595	IL12RB2
3817-18_1	KPCT	Protein kinase C theta type	Q04759	5588	PRKCQ
3820-68_2	MAPK2	MAP kinase-activated protein kinase 2	P49137	9261	MAPKAPK2
3821-28_1	MAPK5	MAP kinase-activated protein kinase 5	Q8IW41	8550	MAPKAPK5
3822-54_2	MAPKAPK3	MAP kinase-activated protein kinase 3	Q16644	7867	MAPKAPK3
3823-9_1	MATK	Megakaryocyte-associated tyrosine-protein kinase	P42679	4145	MATK
3825-18_2	MK08	Mitogen-activated protein kinase 8	P45983	5599	MAPK8
3827-22_1	PAK6	Serine/threonine-protein kinase PAK 6	Q9NQU5	56924	PAK6
3828-54_2	PDGF-CC	Platelet-derived growth factor C	Q9NRA1	56034	PDGFC
3831-21_1	pTEN	Phosphatidylinositol 3,4,5-trisphosphate 3-phosphatase and dual-specificity protein phosphatase PTEN	P60484	5728	PTEN
3832-51_1	PTK6	Protein-tyrosine kinase 6	Q13882	5753	PTK6
3835-11_2	TLR2	Toll-like receptor 2	O60603	7097	TLR2
3836-51_2	UFM1	Ubiquitin-fold modifier 1	P61960	51569	UFM1
3837-6_2	ZAP70	Tyrosine-protein kinase ZAP-70	P43403	7535	ZAP70
3839-60_2	AIP	AH receptor-interacting protein	O00170	9049	AIP
3844-2_1	Cyclophilin A	Peptidyl-prolyl cis-trans isomerase A	P62937	5478	PPIA
3845-51_2	DLRB1	Dynein light chain roadblock-type 1	Q9NP97	83658	DYNLRB1
3847-56_2	ETHE1	Persulfide dioxygenase ETHE1, mitochondrial	O95571	23474	ETHE1
3848-14_2	GAPDH, liver	Glyceraldehyde-3-phosphate dehydrogenase	P04406	2597	GAPDH
3852-19_2	HSP 40	DnaJ homolog subfamily B member 1	P25685	3337	DNAJB1
3853-56_1	MDHC	Malate dehydrogenase, cytoplasmic	P40925	4190	MDH1
3854-24_1	NACA	Nascent polypeptide-associated complex subunit alpha	Q13765	4666	NACA
3855-56_1	Peroxiredoxin-1	Peroxiredoxin-1	Q06830	5052	PRDX1
3858-5_1	PPAC	Low molecular weight phosphotyrosine protein phosphatase	P24666	52	ACP1
3859-50_2	PSA1	Proteasome subunit alpha type-1	P25786	5682	PSMA1
3860-7_2	PSA6	Proteasome subunit alpha type-6	P60900	5687	PSMA6
3864-5_2	RS7	40S ribosomal protein S7	P62081	6201	RPS7
3865-53_1	RSK-like protein kinase	Ribosomal protein S6 kinase alpha-5	O75582	9252	RPS6KA5
3866-7_2	SBDS	Ribosome maturation protein SBDS	Q9Y3A5	51119	SBDS
3867-49_1	SE6L2	Seizure 6-like protein 2	Q6UXD5	26470	SEZ6L2
3868-8_1	SGTA	Small glutamine-rich tetratricopeptide repeat-containing protein alpha	O43765	6449	SGTA
3872-2_1	TCTP	Translationally-controlled tumor protein	P13693	7178	TPT1
3873-51_2	TMA	Thyroid peroxidase	P07202	7173	TPO
3874-8_1	UB2L3	Ubiquitin-conjugating enzyme E2 L3	P68036	7332	UBE2L3
3875-62_1	ARI3A	AT-rich interactive domain-containing protein 3A	Q99856	1820	ARID3A
3877-67_2	CaMKK alpha	Calcium/calmodulin-dependent protein kinase kinase 1	Q8N5S9	84254	CAMKK1
3879-50_1	CDC37	Hsp90 co-chaperone Cdc37	Q16543	11140	CDC37
3881-49_2	DLC8	Dynein light chain 1, cytoplasmic	P63167	8655	DYNLL1
3887-90_2	IMB1	Importin subunit beta-1	Q14974	3837	KPNB1
3888-8_1	ING1	Inhibitor of growth protein 1	Q9UK53	3621	ING1
3889-64_2	Lamin-B1	Lamin-B1	P20700	4001	LMNB1
3890-8_2	LDH-H 1	L-lactate dehydrogenase B chain	P07195	3945	LDHB
3891-56_1	MBD4	Methyl-CpG-binding domain protein 4	O95243	8930	MBD4
3892-21_2	MED-1	Mediator of RNA polymerase II transcription subunit 1	Q15648	5469	MED1
3893-55_2	Mesothelin	Mesothelin	Q13421	10232	MSLN
3893-64_1	Mesothelin	Mesothelin	Q13421	10232	MSLN
3894-15_2	NAGK	N-acetyl-D-glucosamine kinase	Q9UJ70	55577	NAGK
3896-5_2	Phosphoglycerate mutase 1	Phosphoglycerate mutase 1	P18669	5223	PGAM1
3897-61_1	PLPP	Pyridoxal phosphate phosphatase	Q96GD0	57026	PDXP
3898-5_2	PSD7	26S proteasome non-ATPase regulatory subunit 7	P51665	5713	PSMD7
3902-21_2	SKP1	S-phase kinase-associated protein 1	P63208	6500	SKP1
3903-49_2	Sorting nexin 4	Sorting nexin-4	O95219	8723	SNX4
3905-62_1	UBE2N	Ubiquitin-conjugating enzyme E2 N	P61088	7334	UBE2N
4122-12_2	discoidin domain receptor 1	Epithelial discoidin domain-containing receptor 1	Q08345	780	DDR1
4123-60_2	FGF-4	Fibroblast growth factor 4	P08620	2249	FGF4
4124-24_2	HSP 70	Heat shock 70 kDa protein 1A/1B	P08107	3303	HSPA1A
4125-52_2	sRAGE	Advanced glycosylation end product-specific receptor, soluble	Q15109	177	AGER
4126-22_1	BPI	Bactericidal permeability-increasing protein	P17213	671	BPI
4127-75_1	C6	Complement component C6	P13671	729	C6
4128-27_2	Eotaxin-2	C-C motif chemokine 24	O00175	6369	CCL24
4129-72_1	Factor B	Complement factor B	P00751	629	CFB
4130-71_1	FGF-6	Fibroblast growth factor 6	P10767	2251	FGF6
4131-72_2	Fibronectin	Fibronectin	P02751	2335	FN1
4132-27_2	FST	Follistatin	P19883	10468	FST
4133-54_2	Granzyme B	Granzyme B	P10144	3002	GZMB
4134-4_2	HB-EGF	Heparin-binding EGF-like growth factor	Q99075	1839	HBEGF
4135-84_2	IgE	Immunoglobulin E	P01854	3497 50802 3535	IGHE IGK@ IGL@
4136-40_2	IL-17D	Interleukin-17D	Q8TAD2	53342	IL17D
4137-57_2	IL-17E	Interleukin-25	Q9H293	64806	IL25
4138-25_2	IL-20	Interleukin-20	Q9NYY1	50604	IL20
4139-71_2	IL-6 sRa	Interleukin-6 receptor subunit alpha	P08887	3570	IL6R
4140-3_2	IL-7	Interleukin-7	P13232	3574	IL7
4141-79_1	IP-10	C-X-C motif chemokine 10	P02778	3627	CXCL10
4143-74_2	Lymphotactin	Lymphotactin	P47992	6375	XCL1
4144-13_1	MCP-4	C-C motif chemokine 13	Q99616	6357	CCL13
4145-58_2	Neurotrophin-3	Neurotrophin-3	P20783	4908	NTF3
4146-58_2	Neurotrophin-5	Neurotrophin-4	P34130	4909	NTF4
4148-49_2	PAPP-A	Pappalysin-1	Q13219	5069	PAPPA
4149-8_2	PDGF-BB	Platelet-derived growth factor subunit B	P01127	5155	PDGFB
4150-75_2	Plasmin	Plasmin	P00747	5340	PLG
4151-6_2	Plasminogen	Plasminogen	P00747	5340	PLG
4152-58_2	Prekallikrein	Plasma kallikrein	P03952	3818	KLKB1
4153-11_2	alpha-1-antichymotrypsin complex	alpha-1-antichymotrypsin complex	P01011		SERPINA3
4154-57_2	P-Selectin	P-Selectin	P16109	6403	SELP
4155-3_2	Tenascin	Tenascin	P24821	3371	TNC
4156-74_1	TGF-b2	Transforming growth factor beta-2	P61812	7042	TGFB2
4157-2_1	Thrombin	Thrombin	P00734	2147	F2
4158-54_2	uPA	Urokinase-type plasminogen activator	P00749	5328	PLAU
4159-130_1	Factor H	Complement factor H	P08603	3075	CFH
4160-49_1	MMP-2	72 kDa type IV collagenase	P08253	4313	MMP2
4162-54_2	Transferrin	Serotransferrin	P02787	7018	TF
4163-5_2	Histone H2A.z	Histone H2A.z	P0C0S5	3015	H2AFZ
4165-2_1	Thyroglobulin	Thyroglobulin	P01266	7038	TG
4179-57_3	2014-03-03	14-3-3 protein family	P31946, P62258, P61981, Q04917, P27348, P63104, P31947	7529, 7531, 7532, 7533, 10971, 7534, 2810	YWHAB,YWHAE,YWHAG,YWHAH,YWHAQ,YWHAZ,SFN
4184-43_3	4EBP2	Eukaryotic translation initiation factor 4E-binding protein 2	Q13542	1979	EIF4EBP2
4187-49_2	6-Phosphogluconate dehydrogenase	6-phosphogluconate dehydrogenase, decarboxylating	P52209	5226	PGD
4188-1_2	Aflatoxin B1 aldehyde reductase	Aflatoxin B1 aldehyde reductase member 2	O43488	8574	AKR7A2
4192-10_2	AK1A1	Alcohol dehydrogenase [NADP(+)]	P14550	10327	AKR1A1
4194-26_3	AN32B	Acidic leucine-rich nuclear phosphoprotein 32 family member B	Q92688	10541	ANP32B
4203-50_2	Cofilin-1	Cofilin-1	P23528	1072	CFL1
4209-60_2	DRG-1	Vacuolar protein sorting-associated protein VTA1 homolog	Q9NP79	51534	VTA1
4212-5_3	EP15R	Epidermal growth factor receptor substrate 15-like 1	Q9UBC2	58513	EPS15L1
4217-49_3	ERAB	3-hydroxyacyl-CoA dehydrogenase type-2	Q99714	3028	HSD17B10
4220-39_2	FER	Tyrosine-protein kinase Fer	P16591	2241	FER
4224-7_2	HNRPQ	Heterogeneous nuclear ribonucleoprotein Q	O60506	10492	SYNCRIP
4230-1_2	IF4G2	Eukaryotic translation initiation factor 4 gamma 2	P78344	1982	EIF4G2
4232-19_2	IGF-I sR	Insulin-like growth factor 1 receptor	P08069	3480	IGF1R
4234-8_2	IL-1 R4	Interleukin-1 receptor-like 1	Q01638	9173	IL1RL1
4237-70_3	LCMT1	Leucine carboxyl methyltransferase 1	Q9UIC8	51451	LCMT1
4238-4_2	LIN7B	Protein lin-7 homolog B	Q9HAP6	64130	LIN7B
4240-31_2	M2-PK	Pyruvate kinase PKM	P14618	5315	PKM2
4245-80_2	MDM2	E3 ubiquitin-protein ligase Mdm2	Q00987	4193	MDM2
4246-40_2	NCAM-L1	Neural cell adhesion molecule L1	P32004	3897	L1CAM
4249-64_2	NDP kinase B	Nucleoside diphosphate kinase B	P22392	4831	NME2
4250-23_3	NSF1C	NSFL1 cofactor p47	Q9UNZ2	55968	NSFL1C
4254-6_2	NUDC3	NudC domain-containing protein 3	Q8IVD9	23386	NUDCD3
4258-15_2	PA2G4	Proliferation-associated protein 2G4	Q9UQ80	5036	PA2G4
4261-55_2	paraoxonase 1	Serum paraoxonase/arylesterase 1	P27169	5444	PON1
4267-81_3	PESC	Pescadillo homolog	O00541	23481	PES1
4271-75_2	PFD5	Prefoldin subunit 5	Q99471	5204	PFDN5
4272-46_2	PHI	Glucose-6-phosphate isomerase	P06744	2821	GPI
4276-10_2	prostatic binding protein	Phosphatidylethanolamine-binding protein 1	P30086	5037	PEBP1
4278-14_3	Protein disulfide-isomerase	Protein disulfide-isomerase	P07237	5034	P4HB
4280-47_2	PSA2	Proteasome subunit alpha type-2	P25787	5683	PSMA2
4282-3_2	RAN	GTP-binding nuclear protein Ran	P62826	5901	RAN
4284-18_3	RBM39	RNA-binding protein 39	Q14498	9584	RBM39
4292-5_3	SNAA	Alpha-soluble NSF attachment protein	P54920	8775	NAPA
4294-16_2	Sphingosine kinase 1	Sphingosine kinase 1	Q9NYA1	8877	SPHK1
4301-58_2	Thymidine kinase	Thymidine kinase, cytosolic	P04183	7083	TK1
4304-18_2	transcription factor MLR1, isoform CRA_b	Ligand-dependent nuclear receptor corepressor-like protein	Q8N3X6	254251	LCORL
4306-4_2	Transketolase	Transketolase	P29401	7086	TKT
4309-59_3	Triosephosphate isomerase	Triosephosphate isomerase	P60174	7167	TPI1
4314-12_2	XTP3A	dCTP pyrophosphatase 1	Q9H773	79077	DCTPP1
4318-12_3	PTP-1C	Tyrosine-protein phosphatase non-receptor type 6	P29350	5777	PTPN6
4322-28_3	AMNLS	Protein amnionless	Q9BXJ7	81693	AMN
4324-33_2	CYTT	Cystatin-SA	P09228	1470	CST2
4328-2_2	BOC	Brother of CDO	Q9BWV1	91653	BOC
4330-4_2	PSA	Prostate-specific antigen	P07288	354	KLK3
4332-6_2	CLC1B	C-type lectin domain family 1 member B	Q9P126	51266	CLEC1B
4336-2_1	SAA	Serum amyloid A-1 protein	P0DJI8	6288	SAA1
4337-49_2	CRP	C-reactive protein	P02741	1401	CRP
4342-10_3	sICAM-1	Intercellular adhesion molecule 1	P05362	3383	ICAM1
4355-13_1	DAPK2	Death-associated protein kinase 2	Q9UIK4	23604	DAPK2
4359-87_1	DYRK3	Dual specificity tyrosine-phosphorylation-regulated kinase 3	O43781	8444	DYRK3
4383-97_1	Activin AB	Inhibin beta A chain:Inhibin beta B chain heterodimer	P08476 P09529	36243625	INHBA INHBB
4389-2_1	DHH	Desert hedgehog protein N-product	O43323	50846	DHH
4392-54_2	FGF-12	Fibroblast growth factor 12	P61328	2257	FGF12
4393-3_1	FGF-16	Fibroblast growth factor 16	O43320	8823	FGF16
4394-71_2	FGF-8A	Fibroblast growth factor 8 isoform A	P55075	2253	FGF8
4396-54_1	IFN-lambda 1	Interferon lambda-1	Q8IU54	282618	IFNL1
4397-26_2	IFN-lambda 2	Interferon lambda-2	Q8IZJ0	282616	IFNL2
4407-10_1	MSP	Hepatocyte growth factor-like protein	P26927	4485	MST1
4413-3_2	SLPI	Antileukoproteinase	P03973	6590	SLPI
4414-69_2	SP-D	Pulmonary surfactant-associated protein D	P35247	6441	SFTPD
4420-7_2	ADAM12	Disintegrin and metalloproteinase domain-containing protein 12	O43184	8038	ADAM12
4423-77_2	BCL2-like 1 protein	Bcl-2-like protein 1	Q07817	598	BCL2L1
4428-1_2	CHST2	Carbohydrate sulfotransferase 2	Q9Y4C5	9435	CHST2
4429-51_2	CHST6	Carbohydrate sulfotransferase 6	Q9GZX3	4166	CHST6
4430-44_3	Collectin Kidney 1	Collectin-11	Q9BWP8	78989	COLEC11
4435-66_2	ENPP7	Ectonucleotide pyrophosphatase/phosphodiesterase family member 7	Q6UWV6	339221	ENPP7
4436-1_2	ENTP3	Ectonucleoside triphosphate diphosphohydrolase 3	O75355	956	ENTPD3
4437-56_3	ENTP5	Ectonucleoside triphosphate diphosphohydrolase 5	O75356	957	ENTPD5
4440-15_2	FCRL3	Fc receptor-like protein 3	Q96P31	115352	FCRL3
4449-67_3	GREM1	Gremlin-1	O60565	26585	GREM1
4450-26_2	hnRNP A/B	Heterogeneous nuclear ribonucleoprotein A/B	Q99729	3182	HNRNPAB
4452-9_2	LRRT1	Leucine-rich repeat transmembrane neuronal protein 1	Q86UE6	347730	LRRTM1
4453-83_3	LRRT3	Leucine-rich repeat transmembrane neuronal protein 3	Q86VH5	347731	LRRTM3
4455-89_2	MFGM	Lactadherin	Q08431	4240	MFGE8
4459-68_2	PCSK7	Proprotein convertase subtilisin/kexin type 7	Q16549	9159	PCSK7
4460-8_2	PDPK1	3-phosphoinositide-dependent protein kinase 1	O15530	5170	PDPK1
4464-10_2	Sialoadhesin	Sialoadhesin	Q9BZZ2	6614	SIGLEC1
4467-49_2	SPARCL1	SPARC-like protein 1	Q14515	8404	SPARCL1
4468-21_2	SPHK2	Sphingosine kinase 2	Q9NRA0	56848	SPHK2
4469-78_2	ST4S6	Carbohydrate sulfotransferase 15	Q7LFX5	51363	CHST15
4471-50_2	TGM3	Protein-glutamine gamma-glutamyltransferase E	Q08188	7053	TGM3
4474-19_2	Ubiquitin	Ubiquitin	P62979	6233	RPS27A
4475-60_3	ZAP70	Tyrosine-protein kinase ZAP-70	P43403	7535	ZAP70
4479-14_2	C1-Esterase Inhibitor	Plasma protease C1 inhibitor	P05155	710	SERPING1
4480-59_2	C3b	Complement C3b	P01024	718	C3
4481-34_2	C4	Complement C4	P0C0L4, P0C0L5	720721	C4A C4B
4482-66_2	C5b, 6 Complex	Complement C5b-C6 complex	P01031,P13671	727729	C5 C6
4487-1_1	FGF7	Fibroblast growth factor 7	P21781	2252	FGF7
4490-65_2	IL-3 Ra	Interleukin-3 receptor subunit alpha	P26951	3563	IL3RA
4491-4_2	IL-5 Ra	Interleukin-5 receptor subunit alpha	Q01344	3568	IL5RA
4493-92_1	IL-11	Interleukin-11	P20809	3589	IL11
4494-63_2	IL-23	Interleukin-23	P29460, Q9NPF7	359351561	IL12B IL23A
4495-33_2	Kininogen, HMW	Kininogen-1	P01042	3827	KNG1
4496-60_2	MMP-12	Macrophage metalloelastase	P39900	4321	MMP12
4498-62_2	NCAM-120	Neural cell adhesion molecule 1, 120 kDa isoform	P13591	4684	NCAM1
4499-21_1	PDGF-AA	Platelet-derived growth factor subunit A	P04085	5154	PDGFA
4500-50_2	SCGF-alpha	Stem Cell Growth Factor-alpha	Q9Y240	6320	CLEC11A
4533-76_2	ATS15	A disintegrin and metalloproteinase with thrombospondin motifs 15	Q8TE58	170689	ADAMTS15
4534-10_2	BSSP4	Brain-specific serine protease 4	Q9GZN4	64063	PRSS22
4535-50_2	BST1	ADP-ribosyl cyclase/cyclic ADP-ribose hydrolase 2	Q10588	683	BST1
4540-11_2	CBX5	Chromobox protein homolog 5	P45973	23468	CBX5
4541-49_2	CDON	Cell adhesion molecule-related/down-regulated by oncogenes	Q4KMG0	50937	CDON
4542-24_2	Clusterin	Clusterin	P10909	1191	CLU
4543-65_2	CONA1	Collagen alpha-1(XXIII) chain	Q86Y22	91522	COL23A1
4544-4_3	CTAP-III	Connective tissue-activating peptide III	P02775	5473	PPBP
4545-53_3	DnaJ homolog	Mitochondrial import inner membrane translocase subunit TIM14	Q96DA6	131118	DNAJC19
4546-27_3	EMR2	EGF-like module-containing mucin-like hormone receptor-like 2	Q9UHX3	30817	EMR2
4547-59_2	FLRT1	Leucine-rich repeat transmembrane protein FLRT1	Q9NZU1	23769	FLRT1
4548-4_2	Fucosyltransferase 3	Galactoside 3(4)-L-fucosyltransferase	P21217	2525	FUT3
4549-78_2	FUT5	Alpha-(1,3)-fucosyltransferase 5	Q11128	2527	FUT5
4550-3_2	FYN	Tyrosine-protein kinase Fyn	P06241	2534	FYN
4551-72_3	GP114	Probable G-protein coupled receptor 114	Q8IZF4	221188	GPR114
4553-65_3	HDGR2	Hepatoma-derived growth factor-related protein 2	Q7Z4V5	84717	HDGFRP2
4556-10_2	IL-34	Interleukin-34	Q6ZMJ4	146433	IL34
4557-61_2	KIRR3	Kin of IRRE-like protein 3	Q8IZU9	84623	KIRREL3
4559-64_2	KYNU	Kynureninase	Q16719	8942	KYNU
4560-34_2	LCK	Tyrosine-protein kinase Lck	P06239	3932	LCK
4561-65_2	Livin B	Baculoviral IAP repeat-containing protein 7 Isoform beta	Q96CA5	79444	BIRC7
4562-1_2	NXPH1	Neurexophilin-1	P58417	30010	NXPH1
4563-61_2	PLCG1	1-phosphatidylinositol 4,5-bisphosphate phosphodiesterase gamma-1	P19174	5335	PLCG1
4564-2_2	PLXC1	Plexin-C1	O60486	10154	PLXNC1
4566-24_3	RSPO2	R-spondin-2	Q6UXX9	340419	RSPO2
4568-17_2	SLIK5	SLIT and NTRK-like protein 5	O94991	26050	SLITRK5
4569-52_2	SORC2	VPS10 domain-containing receptor SorCS2	Q96PQ0	57537	SORCS2
4588-1_2	PH	Pancreatic hormone	P01298	5539	PPY
4593-11_1	PACAP-27	Pituitary adenylate cyclase-activating polypeptide 27	P18509	116	ADCYAP1
4594-22_2	PACAP-38	Pituitary adenylate cyclase-activating polypeptide 38	P18509	116	ADCYAP1
4673-13_2	IL-6	Interleukin-6	P05231	3569	IL6
4693-72_2	3HIDH	3-hydroxyisobutyrate dehydrogenase, mitochondrial	P31937	11112	HIBADH
4695-49_2	CASA	alpha-S1-casein	P47710	1446	CSN1S1
4696-2_2	FABP	Fatty acid-binding protein, heart	P05413	2170	FABP3
4697-59_2	GM-CSF	Granulocyte-macrophage colony-stimulating factor	P04141	1437	CSF2
4703-87_2	TNF-b	Lymphotoxin-alpha	P01374	4049	LTA
4706-17_2	41	Protein 4.1	P11171	2035	EPB41
4707-50_2	2014-03-03	14-3-3 protein family	P31946, P62258, P61981, Q04917, P27348, P63104, P31947	7529, 7531, 7532, 7533, 10971, 7534, 2810	YWHAB,YWHAE,YWHAG,YWHAH,YWHAQ,YWHAZ,SFN
4708-3_2	17-beta-HSD 1	Estradiol 17-beta-dehydrogenase 1	P14061	3292	HSD17B1
4712-28_2	Apo D	Apolipoprotein D	P05090	347	APOD
4717-55_2	IL-3	Interleukin-3	P08700	3562	IL3
4718-5_2	PPIB	Peptidyl-prolyl cis-trans isomerase B	P23284	5479	PPIB
4719-58_2	Protein disulfide isomerase A3	Protein disulfide-isomerase A3	P30101	2923	PDIA3
4721-54_2	TFF3	Trefoil factor 3	Q07654	7033	TFF3
4763-31_3	Afamin	Afamin	P43652	173	AFM
4769-10_3	Olfactomedin-4	Olfactomedin-4	Q6UX06	10562	OLFM4
4771-10_3	ASM3A	Acid sphingomyelinase-like phosphodiesterase 3a	Q92484	10924	SMPDL3A
4774-62_3	FAM107B	Protein FAM107B	Q9H098	83641	FAM107B
4775-34_3	Gelsolin	Gelsolin	P06396	2934	GSN
4785-30_3	CBG	Corticosteroid-binding globulin	P08185	866	SERPINA6
4786-58_3	Cytidylate kinase	UMP-CMP kinase	P30085	51727	CMPK1
4801-13_3	PERL	Lactoperoxidase	P22079	4025	LPO
4807-13_3	CO8A1	Collagen alpha-1(VIII) chain	P27658	1295	COL8A1
4811-33_3	ITI heavy chain H4	Inter-alpha-trypsin inhibitor heavy chain H4	Q14624	3700	ITIH4
4815-25_3	TXD12	Thioredoxin domain-containing protein 12	O95881	51060	TXNDC12
4829-43_6	STRATIFIN	14-3-3 protein sigma	P31947	2810	SFN
4831-4_2	sL-Selectin	L-Selectin	P14151	6402	SELL
4832-75_2	TRAIL R1	Tumor necrosis factor receptor superfamily member 10A	O00220	8797	TNFRSF10A
4834-61_2	Epithelial cell kinase	Ephrin type-A receptor 2	P29317	1969	EPHA2
4840-73_1	G-CSF	Granulocyte colony-stimulating factor	P09919	1440	CSF3
4842-62_2	Glypican 3	Glypican-3	P51654	2719	GPC3
4851-25_1	IL-1a	Interleukin-1 alpha	P01583	3552	IL1A
4859-6_1	BMPR1A	Bone morphogenetic protein receptor type-1A	P36894	657	BMPR1A
4862-63_1	BMP RII	Bone morphogenetic protein receptor type-2	Q13873	659	BMPR2
4866-59_2	TrkB	BDNF/NT-3 growth factors receptor	Q16620	4915	NTRK2
4867-15_2	VEGF121	Vascular endothelial growth factor A, isoform 121	P15692	7422	VEGFA
4874-3_1	Angiogenin	Angiogenin	P03950	283	ANG
4876-32_1	Coagulation Factor IX	Coagulation factor IX	P00740	2158	F9
4878-3_1	Coagulation Factor X	Coagulation Factor X	P00742	2159	F10
4880-21_1	GDF2	Growth/differentiation factor 2	Q9UK05	2658	GDF2
4883-56_2	Insulin	Insulin	P01308	3630	INS
4886-3_1	MCP-3	C-C motif chemokine 7	P80098	6354	CCL7
4889-82_1	WNT7A	Protein Wnt-7a	O00755	7476	WNT7A
4890-10_1	ACTH	Corticotropin	P01189	5443	POMC
4891-50_1	Glucagon	Glucagon	P01275	2641	GCG
4900-8_1	C3a	C3a anaphylatoxin	P01024	718	C3
4903-72_1	Calcineurin	Calcineurin	Q08209 P63098	55305534	PPP3CA PPP3R1
4904-7_1	Caspase-2	Caspase-2	P42575	835	CASP2
4905-63_1	Coactosin-like protein	Coactosin-like protein	Q14019	23406	COTL1
4906-35_1	Coagulation Factor V	Coagulation Factor V	P12259	2153	F5
4907-56_1	D-dimer	D-dimer	P02671 P02675 P02679	224322442266	FGA FGB FGG
4908-6_1	Endoglin	Endoglin	P17813	2022	ENG
4909-68_1	Galectin-8	Galectin-8	O00214	3964	LGALS8
4910-21_1	GIB	Phospholipase A2	P04054	5319	PLA2G1B
4911-49_2	Glutathione S-transferase Pi	Glutathione S-transferase P	P09211	2950	GSTP1
4912-17_1	GOT1	Aspartate aminotransferase, cytoplasmic	P17174	2805	GOT1
4913-78_1	HCC-4	C-C motif chemokine 16	O15467	6360	CCL16
4914-10_1	HCG	Human Chorionic Gonadotropin	P01215,P01233	10811082	CGA CGB
4915-64_2	Hemoglobin	Hemoglobin	P69905, P68871	3039 3043	HBA1 HBB
4916-2_1	IgD	Immunoglobulin D	P01880	3495508023535	IGHD IGK@ IGL@
4917-62_1	Integrin aVb5	Integrin alpha-V: beta-5 complex	P06756, P18084	36853693	ITGAV ITGB5
4918-21_1	Kininogen, HMW	Kininogen-1	P01042	3827	KNG1
4920-10_1	Lysozyme	Lysozyme C	P61626	4069	LYZ
4922-13_1	MIP-3b	C-C motif chemokine 19	Q99731	6363	CCL19
4924-32_1	MMP-1	Interstitial collagenase	P03956	4312	MMP1
4925-54_2	MMP-13	Collagenase 3	P45452	4322	MMP13
4929-55_1	SHBG	Sex hormone-binding globulin	P04278	6462	SHBG
4930-21_1	Stanniocalcin-1	Stanniocalcin-1	P52823	6781	STC1
4931-59_1	TF	Tissue Factor	P13726	2152	F3
4956-2_1	EPI	Epiregulin	O14944	2069	EREG
4957-1_2	40S ribosomal protein SA	40S ribosomal protein SA	P08865	3921	RPSA
4959-2_1	AGR2	Anterior gradient protein 2 homolog	O95994	10551	AGR2
4960-72_1	annexin I	Annexin A1	P04083	301	ANXA1
4961-17_1	annexin II	Annexin A2	P07355	302	ANXA2
4962-52_1	ARMEL	Cerebral dopamine neurotrophic factor	Q49AH0	441549	CDNF
4963-19_1	ARP19	cAMP-regulated phosphoprotein 19	P56211	10776	ARPP19
4964-67_1	ARTS1	Endoplasmic reticulum aminopeptidase 1	Q9NZ08	51752	ERAP1
4965-27_1	ATP synthase beta chain	ATP synthase subunit beta, mitochondrial	P06576	506	ATP5B
4967-1_1	C1QBP	Complement component 1 Q subcomponent-binding protein, mitochondrial	Q07021	708	C1QBP
4968-50_1	CAPG	Macrophage-capping protein	P40121	822	CAPG
4969-2_1	Carbonic anhydrase I	Carbonic anhydrase 1	P00915	759	CA1
4970-55_1	carbonic anhydrase II	Carbonic anhydrase 2	P00918	760	CA2
4971-1_1	CATZ	Cathepsin Z	Q9UBR2	1522	CTSZ
4973-18_1	cIAP-2	Baculoviral IAP repeat-containing protein 3	Q13489	330	BIRC3
4976-57_1	CRK	Adapter molecule crk	P46108	1398	CRK
4978-54_2	DBNL	Drebrin-like protein	Q9UJU6	28988	DBNL
4979-34_2	DERM	Dermatopontin	Q07507	1805	DPT
4981-6_1	DSC3	Desmocollin-3	Q14574	1825	DSC3
4982-54_1	Elafin	Elafin	P19957	5266	PI3
4983-6_1	ERP29	Endoplasmic reticulum resident protein 29	P30040	10961	ERP29
4984-83_1	Esterase D	S-formylglutathione hydrolase	P10768	2098	ESD
4985-11_1	FABPE	Fatty acid-binding protein, epidermal	Q01469	2171	FABP5
4986-59_1	FAK1	Focal adhesion kinase 1	Q05397	5747	PTK2
4987-17_1	FCAR	Immunoglobulin alpha Fc receptor	P24071	2204	FCAR
4988-49_2	FGFR4	Fibroblast growth factor receptor 4	P22455	2264	FGFR4
4989-7_1	Fibrinogen g-chain dimer	Fibrinogen gamma chain	P02679	2266	FGG
4990-87_1	GP1BA	Platelet glycoprotein Ib alpha chain	P07359	2811	GP1BA
4991-12_1	GPC5	Glypican-5	P78333	2262	GPC5
4992-49_1	GRN	Granulins	P28799	2896	GRN
4993-16_1	GSTA3	Glutathione S-transferase A3	Q16772	2940	GSTA3
4994-178_1	hnRNP K	Heterogeneous nuclear ribonucleoprotein K	P61978	3190	HNRNPK
4995-16_1	HPG-	15-hydroxyprostaglandin dehydrogenase [NAD(+)]	P15428	3248	HPGD
4996-66_1	HRG	Histidine-rich glycoprotein	P04196	3273	HRG
4997-19_1	IF4A3	Eukaryotic initiation factor 4A-III	P38919	9775	EIF4A3
4998-50_2	JAK2	Tyrosine-protein kinase JAK2	O60674	3717	JAK2
5000-52_1	LG3BP	Galectin-3-binding protein	Q08380	3959	LGALS3BP
5001-6_2	Mammaglobin 2	Mammaglobin-B	O75556	4246	SCGB2A1
5002-76_1	MMP-14	Matrix metalloproteinase-14	P50281	4323	MMP14
5004-69_1	MK11	Mitogen-activated protein kinase 11	Q15759	5600	MAPK11
5005-4_1	MK12	Mitogen-activated protein kinase 12	P53778	6300	MAPK12
5006-71_1	MK13	Mitogen-activated protein kinase 13	O15264	5603	MAPK13
5007-1_1	MAPK14	Mitogen-activated protein kinase 14	Q16539	1432	MAPK14
5008-51_1	Mn SOD	Superoxide dismutase [Mn], mitochondrial	P04179	6648	SOD2
5009-11_1	Moesin	Moesin	P26038	4478	MSN
5011-11_1	PBEF	Nicotinamide phosphoribosyltransferase	P43490	10135	NAMPT
5012-67_1	Myokinase, human	Adenylate kinase isoenzyme 1	P00568	203	AK1
5013-2_1	NCC27	Chloride intracellular channel protein 1	O00299	1192	CLIC1
5014-49_1	NCK1	Cytoplasmic protein NCK1	P16333	4690	NCK1
5015-15_1	PAFAH	Platelet-activating factor acetylhydrolase	Q13093	7941	PLA2G7
5016-61_2	PARK7	Protein DJ-1	Q99497	11315	PARK7
5017-19_1	Peroxiredoxin-5	Peroxiredoxin-5, mitochondrial	P30044	25824	PRDX5
5018-68_1	Peroxiredoxin-6	Peroxiredoxin-6	P30041	9588	PRDX6
5019-16_2	PGP9.5	Ubiquitin carboxyl-terminal hydrolase isozyme L1	P09936	7345	UCHL1
5020-50_1	phosphoglycerate kinase 1	Phosphoglycerate kinase 1	P00558	5230	PGK1
5021-13_1	PPase	Inorganic pyrophosphatase	Q15181	5464	PPA1
5023-23_1	PUR8	Adenylosuccinate lyase	P30566	158	ADSL
5024-67_1	Rb	Retinoblastoma-associated protein	P06400	5925	RB1
5026-66_1	RS3	40S ribosomal protein S3	P23396	6188	RPS3
5028-59_1	sCD163	Scavenger receptor cysteine-rich type 1 protein M130	Q86VB7	9332	CD163
5029-3_1	SEPR	Seprase	Q12884	2191	FAP
5030-52_1	SIRT2	NAD-dependent protein deacetylase sirtuin-2	Q8IXJ6	22933	SIRT2
5031-10_1	SPTA2	Spectrin alpha chain, non-erythrocytic 1	Q13813	6709	SPTAN1
5032-64_1	SSRP1	FACT complex subunit SSRP1	Q08945	6749	SSRP1
5033-27_1	Tropomyosin 1 alpha chain	Tropomyosin alpha-1 chain	P09493	7168	TPM1
5034-79_1	Trypsin 2	Trypsin-2	P07478	5645	PRSS2
5035-7_1	TS	Thymidylate synthase	P04818	7298	TYMS
5036-50_1	TSG-6	Tumor necrosis factor-inducible gene 6 protein	P98066	7130	TNFAIP6
5059-8_3	AMHR2	Anti-Muellerian hormone type-2 receptor	Q16671	269	AMHR2
5060-62_3	B7-H1	Programmed cell death 1 ligand 1	Q9NZQ7	29126	CD274
5061-27_3	B7-H2	ICOS ligand	O75144	23308	ICOSLG
5062-60_3	CD226	CD226 antigen	Q15762	10666	CD226
5063-12_2	CD244	Natural killer cell receptor 2B4	Q9BZW8	51744	CD244
5065-8_2	CD83	CD83 antigen	Q01151	9308	CD83
5066-134_3	CLM6	CMRF35-like molecule 6	Q08708	10871	CD300C
5068-54_3	CRTAM	Cytotoxic and regulatory T-cell molecule	O95727	56253	CRTAM
5069-9_3	DAF	Complement decay-accelerating factor	P08174	1604	CD55
5070-76_3	DcR3	Tumor necrosis factor receptor superfamily member 6B	O95407	8771	TNFRSF6B
5071-3_3	Desmoglein-2	Desmoglein-2	Q14126	1829	DSG2
5073-30_2	DR3	Tumor necrosis factor receptor superfamily member 25	Q93038	8718	TNFRSF25
5076-53_2	EPHAA	Ephrin type-A receptor 10	Q5JZY3	284656	EPHA10
5077-28_3	EPHB2	Ephrin type-B receptor 2	P29323	2048	EPHB2
5078-82_3	EphB6	Ephrin type-B receptor 6	O15197	2051	EPHB6
5080-131_3	GPNMB	Transmembrane glycoprotein NMB	Q14956	10457	GPNMB
5082-51_3	IL-1 sR9	X-linked interleukin-1 receptor accessory protein-like 2	Q9NP60	26280	IL1RAPL2
5084-154_3	IL-17B R	interleukin-17 receptor B	Q9NRM6	55540	IL17RB
5085-18_3	IL-20 Ra	Interleukin-20 receptor subunit alpha	Q9UHF4	53832	IL20RA
5087-5_3	IL-22BP	Interleukin-22 receptor subunit alpha-2	Q969J5	116379	IL22RA2
5088-175_3	IL-23 R	Interleukin-23 receptor	Q5VWK5	149233	IL23R
5089-11_3	IL-7 Ra	Interleukin-7 receptor subunit alpha	P16871	3575	IL7R
5090-49_2	ILT-2	Leukocyte immunoglobulin-like receptor subfamily B member 1	Q8NHL6	10859	LILRB1
5091-28_3	ILT-4	Leukocyte immunoglobulin-like receptor subfamily B member 2	Q8N423	10288	LILRB2
5092-51_3	JAG1	Protein jagged-1	P78504	182	JAG1
5093-47_3	JAG2	Protein jagged-2	Q9Y219	3714	JAG2
5094-62_3	JAML1	Junctional adhesion molecule-like	Q86YT9	120425	AMICA1
5095-7_3	KI2L4	Killer cell immunoglobulin-like receptor 2DL4	Q99706	3805	KIR2DL4
5096-51_3	KI3L2	Killer cell immunoglobulin-like receptor 3DL2	P43630	3812	KIR3DL2
5097-14_3	KI3S1	Killer cell immunoglobulin-like receptor 3DS1	Q14943	3813	KIR3DS1
5098-79_3	KLRF1	Killer cell lectin-like receptor subfamily F member 1	Q9NZS2	51348	KLRF1
5099-14_3	LAG-3	Lymphocyte activation gene 3 protein	P18627	3902	LAG3
5100-53_3	LIMP II	Lysosome membrane protein 2	Q14108	950	SCARB2
5102-55_3	MICB	MHC class I polypeptide-related sequence B	Q29980	4277	MICB
5103-30_3	MO2R1	Cell surface glycoprotein CD200 receptor 1	Q8TD46	131450	CD200R1
5104-57_3	NKp46	Natural cytotoxicity triggering receptor 1	O76036	9437	NCR1
5105-2_3	Nogo Receptor	Reticulon-4 receptor	Q9BZR6	65078	RTN4R
5106-52_3	NOTC2	Neurogenic locus notch homolog protein 2	Q04721	4853	NOTCH2
5107-7_2	Notch 1	Neurogenic locus notch homolog protein 1	P46531	4851	NOTCH1
5108-72_3	Notch-3	Neurogenic locus notch homolog protein 3	Q9UM47	4854	NOTCH3
5109-24_3	Nr-CAM	Neuronal cell adhesion molecule	Q92823	4897	NRCAM
5110-84_3	NRX1B	Neurexin-1-beta	P58400	9378	NRXN1
5111-15_3	NRX3B	Neurexin-3-beta	Q9HDB5	9369	NRXN3
5112-73_3	OX2G	OX-2 membrane glycoprotein	P41217	4345	CD200
5114-65_3	Prolactin Receptor	Prolactin receptor	P16471	5618	PRLR
5115-31_3	RELT	Tumor necrosis factor receptor superfamily member 19L	Q969Z4	84957	RELT
5116-62_2	ROBO2	Roundabout homolog 2	Q9HCK4	6092	ROBO2
5117-14_3	ROBO3	Roundabout homolog 3	Q96MS0	64221	ROBO3
5118-74_2	RTN4	Reticulon-4	Q9NQC3	57142	RTN4
5121-3_2	SEM6B	Semaphorin-6B	Q9H3T3	10501	SEMA6B
5122-92_2	Semaphorin-6A	Semaphorin-6A	Q9H2E6	57556	SEMA6A
5124-62_3	sICAM-5	Intercellular adhesion molecule 5	Q9UMF0	7087	ICAM5
5125-6_3	SIG14	Sialic acid-binding Ig-like lectin 14	Q08ET2	100049587	SIGLEC14
5128-53_3	SLAF6	SLAM family member 6	Q96DU3	114836	SLAMF6
5129-12_3	SREC-I	Scavenger receptor class F member 1	Q14162	8578	SCARF1
5130-67_3	SREC-II	Scavenger receptor class F member 2	Q96GP6	91179	SCARF2
5131-15_3	TAJ	Tumor necrosis factor receptor superfamily member 19	Q9NS68	55504	TNFRSF19
5132-71_3	TCCR	Interleukin-27 receptor subunit alpha	Q6UWB1	9466	IL27RA
5133-17_3	TGF-b R II	TGF-beta receptor type-2	P37173	7048	TGFBR2
5134-52_2	TIMD3	Hepatitis A virus cellular receptor 2	Q8TDQ0	84868	HAVCR2
5138-50_3	TWEAKR	Tumor necrosis factor receptor superfamily member 12A	Q9NP84	51330	TNFRSF12A
5139-32_3	UNC5H3	Netrin receptor UNC5C	O95185	8633	UNC5C
5140-56_3	UNC5H4	Netrin receptor UNC5D	Q6UXZ4	137970	UNC5D
5178-5_3	PDE7A	High affinity cAMP-specific 3',5'-cyclic phosphodiesterase 7A	Q13946	5150	PDE7A
5183-53_3	AMPK a1b1g1	AMP Kinase (alpha1beta1gamma1)	Q13131 Q9Y478 P54619	556255645571	PRKAA1 PRKAB1 PRKAG1
5193-51_3	K-ras	GTPase KRas	P01116	3845	KRAS
5196-7_3	NMT1	Glycylpeptide N-tetradecanoyltransferase 1	P30419	4836	NMT1
5201-50_4	PDE9A	High affinity cGMP-specific 3',5'-cyclic phosphodiesterase 9A	O76083	5152	PDE9A
5202-4_3	PPID	Peptidyl-prolyl cis-trans isomerase D	Q08752	5481	PPID
5204-13_3	PSME3	Proteasome activator complex subunit 3	P61289	10197	PSME3
5223-59_3	GCKR	Glucokinase regulatory protein	Q14397	2646	GCKR
5224-20_3	CSK21	Casein kinase II subunit alpha	P68400	1457	CSNK2A1
5225-50_3	CK2-A1:B	Casein kinase II 2-alpha:2-beta heterotetramer	P68400 P67870	14571460	CSNK2A1 CSNK2B
5226-36_3	CK2-A2:B	Casein kinase II 2-alpha':2-beta heterotetramer	P19784 P67870	14591460	CSNK2A2 CSNK2B
5227-60_3	PDK1	[Pyruvate dehydrogenase (acetyl-transferring)] kinase isozyme 1, mitochondrial	Q15118	5163	PDK1
5228-25_2	KIF23	Kinesin-like protein KIF23	Q02241	9493	KIF23
5229-90_3	IMDH1	Inosine-5'-monophosphate dehydrogenase 1	P20839	3614	IMPDH1
5230-99_3	HMGR	3-hydroxy-3-methylglutaryl-coenzyme A reductase	P04035	3156	HMGCR
5231-79_3	PCSK9	Proprotein convertase subtilisin/kexin type 9	Q8NBP7	255738	PCSK9
5236-2_3	NR1D1	Nuclear receptor subfamily 1 group D member 1	P20393	9572	NR1D1
5238-26_3	PPIE	Peptidyl-prolyl cis-trans isomerase E	Q9UNP9	10450	PPIE
5242-37_3	MP2K4	Dual specificity mitogen-activated protein kinase kinase 4	P45985	6416	MAP2K4
5245-40_5	AMPK a2b2g1	AMP Kinase (alpha2beta2gamma1)	P54646 O43741 P54619	556355655571	PRKAA2 PRKAB2 PRKAG1
5246-64_3	cGMP-stimulated PDE	cGMP-dependent 3',5'-cyclic phosphodiesterase	O00408	5138	PDE2A
5247-17_4	Cyclophilin A	Peptidyl-prolyl cis-trans isomerase A	P62937	5478	PPIA
5248-68_2	Cyclophilin F	Peptidyl-prolyl cis-trans isomerase F, mitochondrial	P30405	10105	PPIF
5249-31_3	DRAK2	Serine/threonine-protein kinase 17B	O94768	9262	STK17B
5250-53_3	IMDH2	Inosine-5'-monophosphate dehydrogenase 2	P12268	3615	IMPDH2
5252-33_3	PDE11	Dual 3',5'-cyclic-AMP and -GMP phosphodiesterase 11A	Q9HCR9	50940	PDE11A
5253-1_1	PDE1A	Calcium/calmodulin-dependent 3',5'-cyclic nucleotide phosphodiesterase 1A	P54750	5136	PDE1A
5254-69_3	PDE3A	cGMP-inhibited 3',5'-cyclic phosphodiesterase A	Q14432	5139	PDE3A
5255-22_3	PDE4D	cAMP-specific 3',5'-cyclic phosphodiesterase 4D	Q08499	5144	PDE4D
5256-86_3	PDE5A	cGMP-specific 3',5'-cyclic phosphodiesterase	O76074	8654	PDE5A
5259-2_3	TAK1-TAB1	Mitogen-activated protein kinase kinase kinase 7:TGF-beta-activated kinase 1 and MAP3K7-binding protein 1 fusion	O43318 Q15750	688510454	MAP3K7 TAB1
5260-80_3	TYK2	Non-receptor tyrosine-protein kinase TYK2	P29597	7297	TYK2
5261-13_3	ABL2	Abelson tyrosine-protein kinase 2	P42684	27	ABL2
5262-57_3	BCAR3	Breast cancer anti-estrogen resistance protein 3	O75815	8412	BCAR3
5264-65_3	calreticulin	Calreticulin	P27797	811	CALR
5265-12_3	GRB2-related adapter protein 2	GRB2-related adapter protein 2	O75791	9402	GRAP2
5268-49_3	MMP-16	Matrix metalloproteinase-16	P51512	4325	MMP16
5271-5_1	RAC3	Ras-related C3 botulinum toxin substrate 3	P60763	5881	RAC3
5272-55_2	SHC1	SHC-transforming protein 1	P29353	6464	SHC1
5275-28_2	VAV	Proto-oncogene vav	P15498	7409	VAV1
5280-68_5	GHC2	Mitochondrial glutamate carrier 2	Q9H1K4	83733	SLC25A18
5301-7_3	Eotaxin	Eotaxin	P51671	6356	CCL11
5307-12_3	Coagulation Factor IXab	Coagulation factor IXab	P00740	2158	F9
5308-89_2	Elastase	Neutrophil elastase	P08246	1991	ELANE
5312-49_3	Apo E2	Apolipoprotein E (isoform E2)	P02649	348	APOE
5315-22_3	Troponin T	Troponin T, cardiac muscle	P45379	7139	TNNT2
5316-54_3	Prothrombin	Prothrombin	P00734	2147	F2
5335-73_3	annexin VI	Annexin A6	P08133	309	ANXA6
5337-64_3	B7-2	T-lymphocyte activation antigen CD86	P42081	942	CD86
5339-49_3	calgranulin B	Protein S100-A9	P06702	6280	S100A9
5340-24_3	Caspase-10	Caspase-10	Q92851	843	CASP10
5343-74_3	CBPE	Carboxypeptidase E	P16870	1363	CPE
5346-24_3	CPNE1	Copine-1	Q99829	8904	CPNE1
5347-59_3	Cyclin B1	G2/mitotic-specific cyclin-B1	P14635	891	CCNB1
5349-69_3	DLL1	Delta-like protein 1	O00548	28514	DLL1
5350-14_2	GPC6	Glypican-6	Q9Y625	10082	GPC6
5351-52_3	hnRNP A2/B1	Heterogeneous nuclear ribonucleoproteins A2/B1	P22626	3181	HNRNPA2B1
5352-11_3	HVEM	Tumor necrosis factor receptor superfamily member 14	Q92956	8764	TNFRSF14
5353-89_2	IL-1Ra	Interleukin-1 receptor antagonist protein	P18510	3557	IL1RN
5354-11_3	Keratin 18	Keratin, type I cytoskeletal 18	P05783	3875	KRT18
5355-69_3	LIGHT	Tumor necrosis factor ligand superfamily member 14	O43557	8740	TNFSF14
5356-2_3	MIF	Macrophage migration inhibitory factor	P14174	4282	MIF
5357-60_3	NLGNX	Neuroligin-4, X-linked	Q8N0W4	57502	NLGN4X
5358-3_3	OMD	Osteomodulin	Q99983	4958	OMD
5359-65_3	PIM1	Serine/threonine-protein kinase pim-1	P11309	5292	PIM1
5360-9_2	PKB beta	RAC-beta serine/threonine-protein kinase	P31751	208	AKT2
5363-51_3	Semaphorin 3E	Semaphorin-3E	O15041	9723	SEMA3E
5364-7_3	SET	Protein SET	Q01105	6418	SET
5383-14_3	BAFF Receptor	Tumor necrosis factor receptor superfamily member 13C	Q96RJ3	115650	TNFRSF13C
5384-67_3	BRF-1	Transcription factor IIIB 90 kDa subunit	Q92994	2972	BRF1
5392-73_2	Fas, soluble	Tumor necrosis factor receptor superfamily member 6	P25445	355	FAS
5400-52_3	sLeptin R	Leptin receptor	P48357	3953	LEPR
5404-53_3	DR6	Tumor necrosis factor receptor superfamily member 21	O75509	27242	TNFRSF21
5410-53_3	CAD15	Cadherin-15	P55291	1013	CDH15
5412-53_3	CD27	CD27 antigen	P26842	939	CD27
5424-55_3	RANK	Tumor necrosis factor receptor superfamily member 11A	Q9Y6Q6	8792	TNFRSF11A
5430-66_3	SHPS1	Tyrosine-protein phosphatase non-receptor type substrate 1	P78324	140885	SIRPA
5451-1_3	ALCAM	CD166 antigen	Q13740	214	ALCAM
5452-71_3	ASGR1	Asialoglycoprotein receptor 1	P07306	432	ASGR1
5456-59_2	CNDP1	Beta-Ala-His dipeptidase	Q96KN2	84735	CNDP1
5457-5_2	COLEC12	Collectin-12	Q5KU26	81035	COLEC12
5459-33_3	CYTN	Cystatin-SN	P01037	1469	CST1
5460-60_3	DEAD-box protein 19B	ATP-dependent RNA helicase DDX19B	Q9UMR2	11269	DDX19B
5462-62_3	Ficolin-3	Ficolin-3	O75636	8547	FCN3
5463-22_3	GAS1	Growth arrest-specific protein 1	P54826	2619	GAS1
5464-52_3	GRB2 adapter protein	Growth factor receptor-bound protein 2	P62993	2885	GRB2
5465-32_3	H6ST1	Heparan-sulfate 6-O-sulfotransferase 1	O60243	9394	HS6ST1
5467-15_3	HSP 90b	Heat shock protein HSP 90-beta	P08238	3326	HSP90AB1
5468-67_3	IL-17 RC	Interleukin-17 receptor C	Q8NAC3	84818	IL17RC
5470-69_2	MED-1	Mediator of RNA polymerase II transcription subunit 1	Q15648	5469	MED1
5475-10_3	PKC-B-II	Protein kinase C beta type (splice variant beta-II)	P05771	5579	PRKCB
5476-66_3	PKC-G	Protein kinase C gamma type	P05129	5582	PRKCG
5478-50_2	PSMA	Glutamate carboxypeptidase 2	Q04609	2346	FOLH1
5480-49_3	RANTES	C-C motif chemokine 5	P13501	6352	CCL5
5481-16_3	RASA1	Ras GTPase-activating protein 1	P20936	5921	RASA1
5482-61_3	RBP	Retinol-binding protein 4	P02753	5950	RBP4
5483-1_3	RGMA	Repulsive guidance molecule A	Q96B86	56963	RGMA
5484-63_3	RS3A	40S ribosomal protein S3a	P61247	6189	RPS3A
5486-73_3	sICAM-2	Intercellular adhesion molecule 2	P13598	3384	ICAM2
5487-7_3	SLAF7	SLAM family member 7	Q9NQ25	57823	SLAMF7
5488-74_3	SRCN1	Proto-oncogene tyrosine-protein kinase Src	P12931	6714	SRC
5489-18_3	Stress-induced-phosphoprotein 1	Stress-induced-phosphoprotein 1	P31948	10963	STIP1
5490-53_3	Testican-1	Testican-1	Q08629	6695	SPOCK1
5491-12_3	Testican-2	Testican-2	Q92563	9806	SPOCK2
5493-17_3	WNK3	Serine/threonine-protein kinase WNK3	Q9BYP7	65267	WNK3
5494-52_3	RUXF	Small nuclear ribonucleoprotein F	P62306	6636	SNRPF
5508-62_3	Cathepsin D	Cathepsin D	P07339	1509	CTSD
5509-7_3	EGF	Epidermal growth factor	P01133	1950	EGF
5526-53_3	GITR	Tumor necrosis factor receptor superfamily member 18	Q9Y5U5	8784	TNFRSF18
5532-53_3	bFGF-R	Fibroblast growth factor receptor 1	P11362	2260	FGFR1
5534-49_2	TRAIL R2	Tumor necrosis factor receptor superfamily member 10B	O14763	8795	TNFRSF10B
5542-22_2	NRP1	Neuropilin-1	O14786	8829	NRP1
5581-28_3	FGL1	Fibrinogen-like protein 1	Q08830	2267	FGL1
5583-62_3	RYK	Tyrosine-protein kinase RYK	P34925	6259	RYK
5584-21_3	Holo-TC II	Holo-Transcobalamin-2	P20062	6948	TCN2
5586-66_3	MINP1	Multiple inositol polyphosphate phosphatase 1	Q9UNW1	9562	MINPP1
5587-3_3	CC134	Coiled-coil domain-containing protein 134	Q9H6E4	79879	CCDC134
5590-11_3	ZPLD1	Zona pellucida-like domain-containing protein 1	Q8TCW7	131368	ZPLD1
5593-11_3	PDIA5	Protein disulfide-isomerase A5	Q14554	10954	PDIA5
5594-87_3	MESD2	LDLR chaperone MESD	Q14696	23184	MESDC2
5598-3_3	GREM2	Gremlin-2	Q9H772	64388	GREM2
5599-88_3	PCYXL	Prenylcysteine oxidase-like	Q8NBM8	78991	PCYOX1L
5601-2_3	PGRP-L	N-acetylmuramoyl-L-alanine amidase	Q96PD5	114770	PGLYRP2
5602-62_3	RNS10	Inactive ribonuclease-like protein 10	Q5GAN6	338879	RNASE10
5605-77_3	MFNG	Beta-1,3-N-acetylglucosaminyltransferase manic fringe	O00587	4242	MFNG
5606-24_3	MFAP1	Microfibrillar-associated protein 1	P55081	4236	MFAP1
5609-92_3	F19A5	Protein FAM19A5	Q7Z5A7	25817	FAM19A5
5610-32_3	CJ038	Protein FAM171A1	Q5VUB5	221061	FAM171A1
5611-56_3	D108B	Beta-defensin 108B	Q8NET1	245911	DEFB108B
5612-16_3	HINT2	Histidine triad nucleotide-binding protein 2, mitochondrial	Q9BX68	84681	HINT2
5613-75_3	NTAL	Linker for activation of T-cells family member 2	Q9GZY6	7462	LAT2
5614-44_3	CRH	Corticoliberin	P06850	1392	CRH
5615-62_3	F172A	Protein FAM172A	Q8WUF8	83989	FAM172A
5617-41_3	NPFF	Pro-FMRFamide-related neuropeptide FF	O15130	8620	NPFF
5618-50_3	FAM3B	Protein FAM3B	P58499	54097	FAM3B
5620-13_3	AMD	Peptidyl-glycine alpha-amidating monooxygenase	P19021	5066	PAM
5621-64_3	THSD1	Thrombospondin type-1 domain-containing protein 1	Q9NS62	55901	THSD1
5623-11_3	CLM1	CMRF35-like molecule 1	Q8TDQ1	146722	CD300LF
5626-20_3	CTRC	Chymotrypsin-C	Q99895	11330	CTRC
5627-53_3	GON1	Progonadoliberin-1	P01148	2796	GNRH1
5628-21_3	SEM3G	Semaphorin-3G	Q9NS98	56920	SEMA3G
5629-58_3	NKG2A	NKG2-A/NKG2-B type II integral membrane protein	P26715	3821	KLRC1
5630-48_3	CM35H	CMRF35-like molecule 8	Q9UGN4	11314	CD300A
5631-83_3	MOTI	Promotilin	P12872	4295	MLN
5632-6_3	CRAC1	Cartilage acidic protein 1	Q9NQ79	55118	CRTAC1
5633-65_3	ILT-4	Leukocyte immunoglobulin-like receptor subfamily B member 2	Q8N423	10288	LILRB2
5634-39_3	OFUT1	GDP-fucose protein O-fucosyltransferase 1	Q9H488	23509	POFUT1
5636-10_3	MFAP4	Microfibril-associated glycoprotein 4	P55083	4239	MFAP4
5637-81_3	NTNG1	Netrin-G1	Q9Y2I2	22854	NTNG1
5638-23_3	GT251	Procollagen galactosyltransferase 1	Q8NBJ5	79709	COLGALT1
5639-49_3	NETO1	Neuropilin and tolloid-like protein 1	Q8TDF5	81832	NETO1
5643-2_3	LCN8	Epididymal-specific lipocalin-8	Q6JVE9	138307	LCN8
5644-60_3	RNAS4	Ribonuclease 4	P34096	6038	RNASE4
5646-20_3	RNAS6	Ribonuclease K6	Q93091	6039	RNASE6
5648-28_3	CTRB2	Chymotrypsinogen B2	Q6GPI1	440387	CTRB2
5649-83_3	PSG4	Pregnancy-specific beta-1-glycoprotein 4	Q00888	5672	PSG4
5650-9_3	PDIA6	Protein disulfide-isomerase A6	Q15084	10130	PDIA6
5651-50_3	PSG7	Putative pregnancy-specific beta-1-glycoprotein 7	Q13046	5676	PSG7
5653-23_3	PRS37	Probable inactive serine protease 37	A4D1T9	136242	PRSS37
5654-70_3	TMX3	Protein disulfide-isomerase TMX3	Q96JJ7	54495	TMX3
5656-53_3	PP11	Poly(U)-specific endoribonuclease	P21128	8909	ENDOU
5657-28_3	SIA4A	CMP-N-acetylneuraminate-beta-galactosamide-alpha-2,3-sialyltransferase 1	Q11201	6482	ST3GAL1
5659-11_3	TRH	Thyrotropin-releasing hormone	P20396	7200	TRH
5663-18_3	PF4V	Platelet factor 4 variant	P10720	5197	PF4V1
5664-57_3	D106A	Beta-defensin 106	Q8N104	245909	DEFB106A
5666-64_3	IL-1 sRII	Interleukin-1 receptor type 2	P27930	7850	IL1R2
5667-3_3	SEM3B	Semaphorin-3B	Q13214	7869	SEMA3B
5669-26_3	SIRB2	Signal-regulatory protein beta-2	Q5JXA9	284759	SIRPB2
5671-1_3	Chymotrypsin	Chymotrypsinogen B	P17538	1504	CTRB1
5675-6_3	PRELP	Prolargin	P51888	5549	PRELP
5676-54_3	ASIP	Agouti-signaling protein	P42127	434	ASIP
5677-15_3	CB066	Uncharacterized protein C2orf66	Q6UXQ4	401027	C2orf66
5679-16_3	HBD-3	Beta-defensin 103	P81534	414325	DEFB103A
5680-54_3	OBP2B	Odorant-binding protein 2b	Q9NPH6	29989	OBP2B
5682-13_3	VASN	Vasorin	Q6EMK4	114990	VASN
5687-5_3	GLU2B	Glucosidase 2 subunit beta	P14314	5589	PRKCSH
5688-65_3	CBLN4	Cerebellin-4	Q9NTU7	140689	CBLN4
5689-1_3	DB112	Beta-defensin 112	Q30KQ8	245915	DEFB112
5690-49_3	TUFT1	Tuftelin	Q9NNX1	7286	TUFT1
5691-2_3	CRLD2	Cysteine-rich secretory protein LCCL domain-containing 2	Q9H0B8	83716	CRISPLD2
5694-57_3	SMOC1	SPARC-related modular calcium-binding protein 1	Q9H4F8	64093	SMOC1
5695-5_3	SPLC2	BPI fold-containing family A member 2	Q96DR5	140683	BPIFA2
5698-60_3	Tenascin-X	Tenascin-X	P22105	7148	TNXB
5699-19_3	CI061	Protein FAM189A2	Q15884	9413	FAM189A2
5704-74_3	Granzyme M	Granzyme M	P51124	3004	GZMM
5707-55_3	ELK3	ETS domain-containing protein Elk-3	P41970	2004	ELK3
5708-1_3	LEAP2	Liver-expressed antimicrobial peptide 2	Q969E1	116842	LEAP2
5713-9_3	IFN-lambda 3	Interferon lambda-3	Q8IZI9	282617	IFNL3
5714-88_3	IFNA6	Interferon alpha-6	P05013	3443	IFNA6
5715-4_3	ABHEA	Alpha/beta hydrolase domain-containing protein 14A	Q9BUJ0	25864	ABHD14A
5716-49_3	CSAG1	Putative chondrosarcoma-associated gene 1 protein	Q6PB30	158511	CSAG1
5717-2_3	CILP	Cartilage intermediate layer protein 1	O75339	8483	CILP
5719-66_3	CI061	Protein FAM189A2	Q15884	9413	FAM189A2
5721-1_3	CD226	CD226 antigen	Q15762	10666	CD226
5722-78_3	Prolylcarboxypeptidase	Lysosomal Pro-X carboxypeptidase	P42785	5547	PRCP
5723-4_3	INSL3	Insulin-like 3	P51460	3640	INSL3
5724-58_3	SBSN	Suprabasin	Q6UWP8	374897	SBSN
5725-1_3	OMD	Osteomodulin	Q99983	4958	OMD
5726-49_3	SG11A	Sperm-associated antigen 11A	Q6PDA7	10407	SPAG11A
5727-35_3	B3GLT	Beta-1,3-glucosyltransferase	Q6Y288	145173	B3GALTL
5728-60_3	FCRL1	Fc receptor-like protein 1	Q96LA6	115350	FCRL1
5730-60_3	BRAK	C-X-C motif chemokine 14	O95715	9547	CXCL14
5731-1_3	ISK6	Serine protease inhibitor Kazal-type 6	Q6UWN8	404203	SPINK6
5733-61_3	IFN10	Interferon alpha-10	P01566	3446	IFNA10
5734-13_3	nectin-4	Nectin-4	Q96NY8	81607	PVRL4
5735-54_3	C1GLC	C1GALT1-specific chaperone 1	Q96EU7	29071	C1GALT1C1
5736-1_3	TRML2	Trem-like transcript 2 protein	Q5T2D2	79865	TREML2
5737-61_3	SEM4D	Semaphorin-4D	Q92854	10507	SEMA4D
5738-25_3	SP-C	Pulmonary surfactant-associated protein C	P11686	6440	SFTPC
5739-75_3	KTDAP	Keratinocyte differentiation-associated protein	P60985	388533	KRTDAP
5740-17_3	ROBO1	Roundabout homolog 1	Q9Y6N7	6091	ROBO1
5742-14_3	PPA6	Lysophosphatidic acid phosphatase type 6	Q9NPH0	51205	ACP6
5743-82_3	CART	Cocaine- and amphetamine-regulated transcript protein	Q16568	9607	CARTPT
5744-12_3	CA056	Protein MENT	Q9BUN1	54964	MENT
5745-64_3	PI15	Peptidase inhibitor 15	O43692	51050	PI15
5746-37_3	EFNB1	Ephrin-B1	P98172	1947	EFNB1
5748-20_3	Acid ceramidase	Acid ceramidase	Q13510	427	ASAH1
5749-53_3	COL	Colipase	P04118	1208	CLPS
5751-14_3	HCCR-1	LETM1 domain-containing protein 1	Q6P1Q0	25875	LETMD1
5752-63_3	SUSD3	Sushi domain-containing protein 3	Q96L08	203328	SUSD3
5753-21_3	F19A1	Protein FAM19A1	Q7Z5A9	407738	FAM19A1
5754-76_3	INSL6	Insulin-like peptide INSL6	Q9Y581	11172	INSL6
5756-66_3	PAPP2	Pappalysin-2	Q9BXP8	60676	PAPPA2
5758-49_3	kallikrein 9	Kallikrein-9	Q9UKQ9	284366	KLK9
5759-10_3	Ephrin-A3	Ephrin-A3	P52797	1944	EFNA3
5762-35_3	Sperm-associated antigen 11	Sperm-associated antigen 11B	Q08648	10407	SPAG11B
5763-67_3	HBD-4	Beta-defensin 104	Q8WTQ1	140596	DEFB104A
5764-4_3	GALT2	Polypeptide N-acetylgalactosaminyltransferase 2	Q10471	2590	GALNT2
5765-53_3	DB121	Beta-defensin 121	Q5J5C9	245934	DEFB121
5792-8_2	AFP	alpha-Fetoprotein	P02771	174	AFP
5798-3_3	BID	BH3-interacting domain death agonist	P55957	637	BID
5801-72_3	b-NGF	beta-nerve growth factor	P01138	4803	NGF
5803-24_3	C3d	Complement C3d fragment	P01024	718	C3
5807-77_3	CD70	CD70 antigen	P32970	970	CD70
5810-25_3	Cripto	Teratocarcinoma-derived growth factor 1	P13385	6997	TDGF1
5813-58_3	Epo	Erythropoietin	P01588	2056	EPO
5822-22_3	GDNF	Glial cell line-derived neurotrophic factor	P39905	2668	GDNF
5825-49_3	IFN-g R1	Interferon gamma receptor 1	P15260	3459	IFNGR1
5834-18_3	IL-9	Interleukin-9	P15248	3578	IL9
5837-49_3	LIF sR	Leukemia inhibitory factor receptor	P42702	3977	LIFR
5843-60_3	NG36	Histone-lysine N-methyltransferase EHMT2	Q96KQ7	10919	EHMT2
5846-24_3	Noggin	Noggin	Q13253	9241	NOG
5852-6_3	S100A12	Protein S100-A12	P80511	6283	S100A12
5854-60_3	tau	Microtubule-associated protein tau	P10636	4137	MAPT
5858-6_5	14-3-3 protein zeta/delta	14-3-3 protein zeta/delta	P63104	7534	YWHAZ
5861-78_3	3HAO	3-hydroxyanthranilate 3,4-dioxygenase	P46952	23498	HAAO
5864-10_3	aldolase A	Fructose-bisphosphate aldolase A	P04075	226	ALDOA
5867-60_3	ARGI1	Arginase-1	P05089	383	ARG1
5870-23_2	BAD	Bcl2 antagonist of cell death	Q92934	572	BAD
5879-51_3	Dynactin subunit 2	Dynactin subunit 2	Q13561	10540	DCTN2
5882-34_2	EF-1-beta	Elongation factor 1-beta	P24534	1933	EEF1B2
5885-55_3	eIF-4H	Eukaryotic translation initiation factor 4H	Q15056	7458	EIF4H
5888-29_3	eIF-5A-1	Eukaryotic translation initiation factor 5A-1	P63241	1984	EIF5A
5897-58_3	Gastrin-releasing peptide	Gastrin-releasing peptide	P07492	2922	GRP
5900-11_2	HINT1	Histidine triad nucleotide-binding protein 1	P49773	3094	HINT1
5903-91_2	HSP70 protein 8	Heat shock cognate 71 kDa protein	P11142	3312	HSPA8
5909-51_3	Nucleoside diphosphate kinase A	Nucleoside diphosphate kinase A	P15531	4830	NME1
5915-58_3	PEX5	Peroxisomal targeting signal 1 receptor	P50542	5830	PEX5
5918-5_3	PSME1	Proteasome activator complex subunit 1	Q06323	5720	PSME1
5921-58_3	S100A7	Protein S100-A7	P31151	6278	S100A7
5927-4_3	WISP-3	WNT1-inducible-signaling pathway protein 3	O95389	8838	WISP3
5930-54_3	Troponin I	Troponin I, cardiac muscle	P19429	7137	TNNI3
5934-1_3	Ferritin	Ferritin	P02794 P02792	24952512	FTH1 FTL
5936-53_3	TNF-a	Tumor necrosis factor	P01375	7124	TNF
5939-42_3	TWEAK	Tumor necrosis factor ligand superfamily member 12	O43508	8742	TNFSF12
5947-90_3	Tpo	Thrombopoietin	P40225	7066	THPO
5954-62_3	PTH	Parathyroid hormone	P01270	5741	PTH
5957-30_3	Somatostatin-28	Somatostatin-28	P61278	6750	SST
5960-49_3	SG1C1	Secretoglobin family 1C member 1	Q8TD33	147199	SCGB1C1
5963-9_3	Dermokine	Dermokine	Q6E0U4	93099	DMKN
5981-6_3	ES1	ES1 protein homolog, mitochondrial	P30042	8209	C21orf33
6019-12_3	C1T9A	Complement C1q and tumor necrosis factor-related protein 9A	P0C862	338872	C1QTNF9
6022-57_3	NELL2	Protein kinase C-binding protein NELL2	Q99435	4753	NELL2
6035-2_3	SIAT1	Beta-galactoside alpha-2,6-sialyltransferase 1	P15907	6480	ST6GAL1
6036-78_3	EPHAA	Ephrin type-A receptor 10	Q5JZY3	284656	EPHA10
6037-6_3	WFD12	WAP four-disulfide core domain protein 12	Q8WWY7	128488	WFDC12
6039-24_3	CRHBP	Corticotropin-releasing factor-binding protein	P24387	1393	CRHBP
6042-52_3	OFUT2	GDP-fucose protein O-fucosyltransferase 2	Q9Y2G5	23275	POFUT2
6048-4_3	SIG10	Sialic acid-binding Ig-like lectin 10	Q96LC7	89790	SIGLEC10
6049-64_3	PTPRS	Receptor-type tyrosine-protein phosphatase S	Q13332	5802	PTPRS
6054-6_3	NXPH3	Neurexophilin-3	O95157	11248	NXPH3
6060-2_3	PIP	Prolactin-inducible protein	P12273	5304	PIP
6064-4_3	TXNDC4	Endoplasmic reticulum resident protein 44	Q9BS26	23071	ERP44
6069-71_3	SUMF2	Sulfatase-modifying factor 2	Q8NBJ7	25870	SUMF2
6070-11_3	QSCN6	Sulfhydryl oxidase 1	O00391	5768	QSOX1
6077-63_3	CECR1	Adenosine deaminase CECR1	Q9NZK5	51816	CECR1
6079-59_3	ACPL2	Acid phosphatase-like protein 2	Q8TE99	92370	ACPL2
6081-52_3	PCOC2	Procollagen C-endopeptidase enhancer 2	Q9UKZ9	26577	PCOLCE2
6086-15_3	CRDL2	Chordin-like protein 2	Q6WN34	25884	CHRDL2
6103-70_3	FCRL5	Fc receptor-like protein 5	Q96RD9	83416	FCRL5
6115-40_3	DIAC	Di-N-acetylchitobiase	Q01459	1486	CTBS
6119-14_3	MAMC2	MAM domain-containing protein 2	Q7Z304	256691	MAMDC2
6121-5_3	RNAS7	Ribonuclease 7	Q9H1E1	84659	RNASE7
6151-18_3	MP2K3	Dual specificity mitogen-activated protein kinase kinase 3	P46734	5606	MAP2K3
6152-111_3	p53	Cellular tumor antigen p53	P04637	7157	TP53
6210-100_3	IFNA5	Interferon alpha-5	P01569	3442	IFNA5
6213-10_3	CGB2	Choriogonadotropin subunit beta variant 2	Q6NT52	114336	CGB2
6214-84_3	IFNA8	Interferon alpha-8	P32881	3445	IFNA8
6217-23_3	QSCN6	Sulfhydryl oxidase 1	O00391	5768	QSOX1
6219-14_3	PDZ11	PDZ domain-containing protein 11	Q5EBL8	51248	PDZD11
6221-1_3	ADPGK	ADP-dependent glucokinase	Q9BRR6	83440	ADPGK
6223-5_3	GUC2B	Guanylate cyclase activator 2B	Q16661	2981	GUCA2B
6226-69_3	EFHA1	Calcium uptake protein 2, mitochondrial	Q8IYU8	221154	EFHA1
6228-58_3	sperm acrosome associated 1	Sperm acrosome membrane-associated protein 1	Q9HBV2	81833	SPACA1
6231-46_3	STC2	Stanniocalcin-2	O76061	8614	STC2
6234-74_3	VITRN	Vitrin	Q6UXI7	5212	VIT
6238-55_3	PSG8	Pregnancy-specific beta-1-glycoprotein 8	Q9UQ74	440533	PSG8
6245-4_3	Nectin-2	Nectin-2	Q92692	5819	PVRL2
6247-9_3	SIRB1	Signal-regulatory protein beta-1	O00241	10326	SIRPB1
6255-74_3	CPXM1	Probable carboxypeptidase X1	Q96SM3	56265	CPXM1
6256-9_3	LY66C	Lymphocyte antigen 6 complex locus protein G6c	O95867	80740	LY6G6C
6257-56_3	CGRE1	Cell growth regulator with EF hand domain protein 1	Q99674	10669	CGREF1
6259-60_3	Epididymal secretory protein E1	Epididymal secretory protein E1	P61916	10577	NPC2
6260-14_3	F163A	Protein FAM163A	Q96GL9	148753	FAM163A
6264-9_3	CYR61	Protein CYR61	O00622	3491	CYR61
6267-51_3	STMN4	Stathmin-4	Q9H169	81551	STMN4
6274-15_3	WSCD2	WSC domain-containing protein 2	Q2TBF2	9671	WSCD2
6276-16_3	Furin	Furin	P09958	5045	FURIN
6277-55_3	ISM2	Isthmin-2	Q6H9L7	145501	ISM2
6281-51_3	SIA4B	CMP-N-acetylneuraminate-beta-galactosamide-alpha-2,3-sialyltransferase 2	Q16842	6483	ST3GAL2
6283-60_3	MCEM1	Mast cell-expressed membrane protein 1	Q8IX19	199675	MCEMP1
6284-7_3	F150B	Protein FAM150B	Q6UX46	285016	FAM150B
6285-71_3	K0152	Malectin	Q14165	9761	MLEC
6289-78_3	RHG36	Rho GTPase-activating protein 36	Q6ZRI8	158763	ARHGAP36
6290-3_3	UTS2B	Urotensin-2B	Q765I0	257313	UTS2B
6291-55_3	Alcadein-beta	Calsyntenin-3	Q9BQT9	9746	CLSTN3
6294-11_3	BAGE2	B melanoma antigen 2	Q86Y30	85319	BAGE2
6295-67_3	VCY1	Testis-specific basic protein Y 1	O14598	9084	VCY
6296-36_3	OIT3	Oncoprotein-induced transcript 3 protein	Q8WWZ8	170392	OIT3
6304-8_3	C1QT1	Complement C1q tumor necrosis factor-related protein 1	Q9BXJ1	114897	C1QTNF1
6315-58_3	PLBL1	Phospholipase B-like 1	Q6P4A8	79887	PLBD1
6324-11_3	DNSL2	Deoxyribonuclease-1-like 2	Q92874	1775	DNASE1L2
6334-9_3	GGT2	Inactive gamma-glutamyltranspeptidase 2	P36268	728441	GGT2
6340-10_3	GPHB5	Glycoprotein hormone beta-5	Q86YW7	122876	GPHB5
6342-10_3	Nephronectin	Nephronectin	Q6UXI9	255743	NPNT
6351-55_3	CD79B	B-cell antigen receptor complex-associated protein beta chain	P40259	974	CD79B
6353-60_3	IGFL4	Insulin growth factor-like family member 4	Q6B9Z1	444882	IGFL4
6354-13_3	HPHL1	Hephaestin-like protein 1	Q6MZM0	341208	HEPHL1
6356-3_3	Carboxypeptidase B1	Carboxypeptidase B	P15086	1360	CPB1
6357-83_3	ELA3B	Chymotrypsin-like elastase family member 3B	P08861	23436	CELA3B
6359-50_3	AGO61	Protein O-linked-mannose beta-1,4-N-acetylglucosaminyltransferase 2	Q8NAT1	84892	POMGNT2
6360-7_3	DB128	Beta-defensin 128	Q7Z7B8	245939	DEFB128
6361-49_3	PTPRR	Receptor-type tyrosine-protein phosphatase R	Q15256	5801	PTPRR
6362-6_3	AUGN	Augurin	Q9H1Z8	84417	C2orf40
6363-55_3	DB124	Beta-defensin 124	Q8NES8	245937	DEFB124
6364-7_3	TPSNR	Tapasin-related protein	Q9BX59	55080	TAPBPL
6365-62_3	KCT2	Keratinocyte-associated transmembrane protein 2	Q8NC54	56951	KCT2
6366-38_3	TXD15	Thioredoxin domain-containing protein 15	Q96J42	79770	TXNDC15
6369-82_3	DEAF1	Deformed epidermal autoregulatory factor 1 homolog	O75398	10522	DEAF1
6371-50_3	ANGL7	Angiopoietin-related protein 7	O43827	10218	ANGPTL7
6372-7_3	YBOX2	Y-box-binding protein 2	Q9Y2T7	51087	YBX2
6373-54_3	SEMG2	Semenogelin-2	Q02383	6407	SEMG2
6375-75_3	XXLT1	Xyloside xylosyltransferase 1	Q8NBI6	152002	XXYLT1
6377-54_3	LYZL2	Lysozyme-like protein 2	Q7Z4W2	119180	LYZL2
6378-2_3	CEI	Protein CEI	Q86SI9	153571	C5orf38
6379-62_3	ATL2	ADAMTS-like protein 2	Q86TH1	9719	ADAMTSL2
6382-17_3	MANBA	Beta-mannosidase	O00462	4126	MANBA
6383-90_3	TLL1	Tolloid-like protein 1	O43897	7092	TLL1
6384-19_3	WFDC3	WAP four-disulfide core domain protein 3	Q8IUB2	140686	WFDC3
6385-63_3	VWA1	von Willebrand factor A domain-containing protein 1	Q6PCB0	64856	VWA1
6388-21_3	CC126	Coiled-coil domain-containing protein 126	Q96EE4	90693	CCDC126
6389-57_3	CUED2	CUE domain-containing protein 2	Q9H467	79004	CUEDC2
6390-18_3	NPS	Neuropeptide S	P0C0P6	594857	NPS
6391-52_3	LIRA3	Leukocyte immunoglobulin-like receptor subfamily A member 3	Q8N6C8	11026	LILRA3
6393-63_3	Endoplasmin	Endoplasmin	P14625	7184	HSP90B1
6395-58_3	GPHA2	Glycoprotein hormone alpha-2	Q96T91	170589	GPHA2
6398-12_3	LONM	Lon protease homolog, mitochondrial	P36776	9361	LONP1
6399-52_3	D107A	Beta-defensin 107	Q8IZN7	245910	DEFB107A
6400-33_3	P5I13	Tumor protein p53-inducible protein 13	Q8NBR0	90313	TP53I13
6401-73_3	SLUR1	Secreted Ly-6/uPAR-related protein 1	P55000	57152	SLURP1
6402-8_3	PILRA	Paired immunoglobulin-like type 2 receptor alpha	Q9UKJ1	29992	PILRA
6405-74_3	PSG2	Pregnancy-specific beta-1-glycoprotein 2	P11465	5670	PSG2
6406-3_3	NMES1	Normal mucosa of esophagus-specific gene 1 protein	Q9C002	84419	NMES1
6407-63_3	LAD1	Ladinin-1	O00515	3898	LAD1
6408-2_3	INHBC	Inhibin beta C chain	P55103	3626	INHBC
6409-57_3	GP116	Probable G-protein coupled receptor 116	Q8IZF2	221395	GPR116
6410-26_3	INSL4	Early placenta insulin-like peptide	Q14641	3641	INSL4
6411-58_3	DB135	Beta-defensin 135	Q30KP9	613209	DEFB135
6412-26_3	IR3IP	Immediate early response 3-interacting protein 1	Q9Y5U9	51124	IER3IP1
6413-79_3	LIPK	Lipase member K	Q5VXJ0	643414	LIPK
6414-8_3	OAF	Out at first protein homolog	Q86UD1	220323	OAF
6415-90_3	CPN2	Carboxypeptidase N subunit 2	P22792	1585	CPN2
6416-8_3	GKN2	Gastrokine-2	Q86XP6	200504	GKN2
6419-75_3	GPA33	Cell surface A33 antigen	Q99795	10223	GPA33
6420-4_3	SDHF2	Succinate dehydrogenase assembly factor 2, mitochondrial	Q9NX18	54949	SDHAF2
6424-2_3	RNS13	Probable inactive ribonuclease-like protein 13	Q5GAN3	440163	RNASE13
6430-36_3	F19A2	Protein FAM19A2	Q8N3H0	338811	FAM19A2
6431-68_3	PCYOX	Prenylcysteine oxidase 1	Q9UHG3	51449	PCYOX1
6433-57_3	FA20A	Protein FAM20A	Q96MK3	54757	FAM20A
6434-18_3	Amine oxidase	Retina-specific copper amine oxidase	O75106	314	AOC2
6439-59_3	CN093	Uncharacterized protein C14orf93	Q9H972	60686	C14orf93
6440-31_3	MFAP5	Microfibrillar-associated protein 5	Q13361	8076	MFAP5
6441-62_3	ATS6	A disintegrin and metalloproteinase with thrombospondin motifs 6	Q9UKP5	11174	ADAMTS6
6442-6_3	BAGE3	B melanoma antigen 3	Q86Y29	85318	BAGE3
6444-15_3	PSG3	Pregnancy-specific beta-1-glycoprotein 3	Q16557	5671	PSG3
6447-73_3	PTX3	Pentraxin-related protein PTX3	P26022	5806	PTX3
6448-36_3	Sema E	Semaphorin-3C	Q99985	10512	SEMA3C
6451-64_3	ASPN	Asporin	Q9BXN1	54829	ASPN
6453-70_3	LIRB4	Leukocyte immunoglobulin-like receptor subfamily B member 4	Q8NHJ6	11006	LILRB4
6454-38_3	Rho-GDIa	Rho GDP-dissociation inhibitor 1	P52565	396	ARHGDIA
6456-17_3	PSG6	Pregnancy-specific beta-1-glycoprotein 6	Q00889	5675	PSG6
6458-6_3	RPN1	Dolichyl-diphosphooligosaccharide--protein glycosyltransferase subunit 1	P04843	6184	RPN1
6462-12_3	TIMP-4	Metalloproteinase inhibitor 4	Q99727	7079	TIMP4
6463-59_3	OX26	Orexigenic neuropeptide QRFP	P83859	347148	QRFP
6464-40_3	PVRIG	Transmembrane protein PVRIG	Q6DKI7	79037	PVRIG
6466-7_3	SPAC7	Protein SPACA7	Q96KW9	122258	SPACA7
6467-65_3	KTEL1	Protein O-glucosyltransferase 1	Q8NBL1	56983	POGLUT1
6468-37_3	TKN4	Tachykinin-4	Q86UU9	255061	TAC4
6469-62_3	LY66D	Lymphocyte antigen 6 complex locus protein G6d	O95868	58530	LY6G6D
6470-19_3	fibulin 1	Fibulin-1	P23142	2192	FBLN1
6472-40_3	GP100	Melanocyte protein PMEL	P40967	6490	PMEL
6473-55_3	PLUNC	BPI fold-containing family A member 1	Q9NP55	51297	BPIFA1
6478-2_3	IGLO5	IgLON family member 5	A6NGN9	402665	IGLON5
6480-1_3	CANT1	Soluble calcium-activated nucleotidase 1	Q8WVQ1	124583	CANT1
6485-59_3	IGLL1	Immunoglobulin lambda-like polypeptide 1	P15814	3543	IGLL1
6491-59_3	kallikrein 15	Kallikrein-15	Q9H2R5	55554	KLK15
6493-9_3	CBPZ	Carboxypeptidase Z	Q66K79	8532	CPZ
6494-60_3	sperm acrosome associated 5	Sperm acrosome-associated protein 5	Q96QH8	389852	SPACA5
6496-60_3	DLK1	Protein delta homolog 1	P80370	8788	DLK1
6497-10_3	XLRS1	Retinoschisin	O15537	6247	RS1
6504-65_3	Lysyl oxidase-like protein 2	Lysyl oxidase homolog 2	Q9Y4K0	4017	LOXL2
6506-54_3	TMEDA	Transmembrane emp24 domain-containing protein 10	P49755	10972	TMED10
6507-16_3	NCAM2	Neural cell adhesion molecule 2	O15394	4685	NCAM2
6508-68_3	SG1D2	Secretoglobin family 1D member 2	O95969	10647	SCGB1D2
6510-56_3	RN128	E3 ubiquitin-protein ligase RNF128	Q8TEB7	79589	RNF128
6511-17_3	F19A4	Protein FAM19A4	Q96LR4	151647	FAM19A4
6512-68_3	KREM1	Kremen protein 1	Q96MU8	83999	KREMEN1
6520-87_3	MGP	Matrix Gla protein	P08493	4256	MGP
6521-35_3	NPTX2	Neuronal pentraxin-2	P47972	4885	NPTX2
6522-57_3	AMBN	Ameloblastin	Q9NP70	258	AMBN
6525-17_3	DUSP13	Dual specificity protein phosphatase 13 isoform A	Q6B8I1	51207	DUSP13
6526-77_3	OBP2A	Odorant-binding protein 2a	Q9NY56	29991	OBP2A
6527-1_3	TRIL	TLR4 interactor with leucine rich repeats	Q7L0X0	9865	TRIL
6528-95_3	EXTL2	Exostosin-like 2	Q9UBQ6	2135	EXTL2
6530-63_3	PROL1	Proline-rich protein 1	Q99935	58503	PROL1
6533-20_3	DNS2B	Deoxyribonuclease-2-beta	Q8WZ79	58511	DNASE2B
6536-54_3	LAML2	Putative phospholipase B-like 2	Q8NHP8	196463	PLBD2
6538-90_3	K2013	Uncharacterized protein KIAA2013	Q8IYS2	90231	KIAA2013
6543-182_3	PRRP	Prolactin-releasing peptide	P81277	51052	PRLH
6544-33_3	NELL1	Protein kinase C-binding protein NELL1	Q92832	4745	NELL1
6545-58_3	PRIO	Major prion protein	P04156	5621	PRNP
6547-83_3	TM11D	Transmembrane protease serine 11D	O60235	9407	TMPRSS11D
6549-60_3	VTM2L	V-set and transmembrane domain-containing protein 2-like protein	Q96N03	128434	VSTM2L
6550-4_3	ICAM4	Intercellular adhesion molecule 4	Q14773	3386	ICAM4
6551-94_3	Vaspin	Serpin A12	Q8IW75	145264	SERPINA12
6553-68_3	CCD19	Coiled-coil domain-containing protein 19, mitochondrial	Q9UL16	25790	CCDC19
6555-58_3	Stomatin-like protein 2	Stomatin-like protein 2, mitochondrial	Q9UJZ1	30968	STOML2
6556-5_3	ENPP5	Ectonucleotide pyrophosphatase/phosphodiesterase family member 5	Q9UJA9	59084	ENPP5
6557-50_3	LRC15	Leucine-rich repeat-containing protein 15	Q8TF66	131578	LRRC15
6558-5_3	COL10	Collectin-10	Q9Y6Z7	10584	COLEC10
6561-77_3	Ig K chain V-I region HK102-like	Ig Kappa chain V-I region HK102- like		652493	LOC652493
6565-68_3	CDCP1	CUB domain-containing protein 1	Q9H5V8	64866	CDCP1
6568-18_3	HECA2	HEPACAM family member 2	A8MVW5	253012	HEPACAM2
6571-75_3	CQ078	Uncharacterized protein C17orf78	Q8N4C9	284099	C17orf78
6572-10_3	LRRT4	Leucine-rich repeat transmembrane neuronal protein 4	Q86VH4	80059	LRRTM4
6574-11_3	FAIM3	Fas apoptotic inhibitory molecule 3	O60667	9214	FAIM3
6575-79_3	ATL1	ADAMTS-like protein 1	Q8N6G6	92949	ADAMTSL1
6576-1_3	ART4	Ecto-ADP-ribosyltransferase 4	Q93070	420	ART4
6577-64_3	LAMA4	Laminin subunit alpha-4	Q16363	3910	LAMA4
6578-29_3	TNMD	Tenomodulin	Q9H2S6	64102	TNMD
6580-29_3	Pregnancy zone protein	Pregnancy zone protein	P20742	5858	PZP
6581-50_3	Gc-Globulin, Mixed Type	Vitamin D-binding protein	P02774	2638	GC
6583-67_3	protein Z inhibitor	Protein Z-dependent protease inhibitor	Q9UK55	51156	SERPINA10
6586-19_3	ADA11	Disintegrin and metalloproteinase domain-containing protein 11	O75078	4185	ADAM11
6590-54_3	Neuropilin-2	Neuropilin-2	O60462	8828	NRP2
6593-5_3	GALT3	Polypeptide N-acetylgalactosaminyltransferase 3	Q14435	2591	GALNT3
6594-64_3	SMDC1	SAYSvFN domain-containing protein 1	Q9NPB0	55776	SAYSD1
6597-24_3	TM157	Membrane protein FAM174A	Q8TBP5	345757	FAM174A
6599-5_3	APCD1	Protein APCDD1	Q8J025	147495	APCDD1
6600-70_3	RELL2	RELT-like protein 2	Q8NC24	285613	RELL2
6601-1_3	UB2J2	Ubiquitin-conjugating enzyme E2 J2	Q8N2K1	118424	UBE2J2
6603-18_3	KALM	Anosmin-1	P23352	3730	KAL1
6604-59_3	CD031	Protein NDNF	Q8TB73	79625	NDNF
6606-61_3	KISS1	Metastasis-suppressor KiSS-1	Q15726	3814	KISS1
6609-22_3	CN37	2',3'-cyclic-nucleotide 3'-phosphodiesterase	P09543	1267	CNP
6611-8_3	KDEL1	KDEL motif-containing protein 1	Q6UW63	79070	KDELC1
6612-90_3	CP079	BRICHOS domain-containing protein 5	Q6PL45	283870	BRICD5
6617-12_3	FCRL6	Fc receptor-like protein 6	Q6DN72	343413	FCRL6
6620-82_3	LIGO1	Leucine-rich repeat and immunoglobulin-like domain-containing nogo receptor-interacting protein 1	Q96FE5	84894	LINGO1
6625-31_3	ATAD1	ATPase family AAA domain-containing protein 1	Q8NBU5	84896	ATAD1
6627-25_3	LIPR1	Inactive pancreatic lipase-related protein 1	P54315	5407	PNLIPRP1
6629-3_3	HBD-1	Beta-defensin 1	P60022	1672	DEFB1
6633-43_3	UPK3L	Uroplakin-3b-like protein	B0FP48	100134938	UPK3BL
6634-4_3	NET1	Netrin-1	O95631	9423	NTN1
6641-60_3	PolyUbiquitin K48	PolyUbiquitin K48-linked	P0CG47	7314	UBB
6643-62_3	CD47	Leukocyte surface antigen CD47	Q08722	961	CD47
6645-53_3	Periostin	Periostin	Q15063	10631	POSTN
6647-55_3	PolyUbiquitin K63	PolyUbiquitin K63-linked	P0CG48	7316	UBC
6649-51_3	NET1	Netrin-1	O95631	9423	NTN1
6650-20_3	Periostin	Periostin	Q15063	10631	POSTN
6651-74_3	PolyUbiquitin K48	PolyUbiquitin K48-linked	P0CG47	7314	UBB
6653-58_3	CD47	Leukocyte surface antigen CD47	Q08722	961	CD47
6895-1_3	TR	Transferrin receptor protein 1	P02786	7037	TFRC
6896-3_3	CA162	Transmembrane protein C1orf162	Q8NEQ5	128346	C1orf162
6897-38_3	B3GA3	Galactosylgalactosylxylosylprotein 3-beta-glucuronosyltransferase 3	O94766	26229	B3GAT3
6899-37_3	PHS2	Pterin-4-alpha-carbinolamine dehydratase 2	Q9H0N5	84105	PCBD2
6900-30_3	UB2J1	Ubiquitin-conjugating enzyme E2 J1	Q9Y385	51465	UBE2J1
6904-14_3	LRRT2	Leucine-rich repeat transmembrane neuronal protein 2	O43300	26045	LRRTM2
6907-17_3	TMC5A	Transmembrane and coiled-coil domain-containing protein 5A	Q8N6Q1	145942	TMCO5A
6909-40_3	MGAT2	Alpha-1,6-mannosyl-glycoprotein 2-beta-N-acetylglucosaminyltransferase	Q10469	4247	MGAT2
6911-103_3	CLC6A	C-type lectin domain family 6 member A	Q6EIG7	93978	CLEC6A
6912-6_3	EFHA2	Calcium uptake protein 3, mitochondrial	Q86XE3	286097	EFHA2
6913-189_3	HMG-2	High mobility group protein B2	P26583	3148	HMGB2
6915-2_3	C16L2	CD164 sialomucin-like 2 protein	Q6UWJ8	388611	CD164L2
6917-49_3	LRRC3	Leucine-rich repeat-containing protein 3	Q9BY71	81543	LRRC3
6918-183_3	CCKN	Cholecystokinin	P06307	885	CCK
6919-3_3	HBAZ	Hemoglobin subunit zeta	P02008	3050	HBZ
6920-1_3	GFRAL	GDNF family receptor alpha-like	Q6UXV0	389400	GFRAL
6921-24_3	B4GT3	Beta-1,4-galactosyltransferase 3	O60512	8703	B4GALT3
6923-1_3	PLOD2	Procollagen-lysine,2-oxoglutarate 5-dioxygenase 2	O00469	5352	PLOD2
6925-26_3	SNX8	Sorting nexin-8	Q9Y5X2	29886	SNX8
6927-7_3	NDST1	Bifunctional heparan sulfate N-deacetylase/N-sulfotransferase 1	P52848	3340	NDST1
6929-10_3	SIA8C	Sia-alpha-2,3-Gal-beta-1,4-GlcNAc-R:alpha 2,8-sialyltransferase	O43173	51046	ST8SIA3
6930-95_3	SIA8F	Alpha-2,8-sialyltransferase 8F	P61647	338596	ST8SIA6
6932-42_3	ITA5	Integrin alpha-5	P08648	3678	ITGA5
6933-20_3	RM34	39S ribosomal protein L34, mitochondrial	Q9BQ48	64981	MRPL34
6934-8_3	DB131	Beta-defensin 131	P59861	644414	DEFB131
6936-7_3	PMEPA	Transmembrane prostate androgen-induced protein	Q969W9	56937	PMEPA1
6940-18_3	JPH1	Junctophilin-1	Q9HDC5	56704	JPH1
6941-11_3	SUMF1	Sulfatase-modifying factor 1	Q8NBK3	285362	SUMF1
6947-4_3	SIA10	Type 2 lactosamine alpha-2,3-sialyltransferase	Q9Y274	10402	ST3GAL6
6948-82_3	FIG4	Polyphosphoinositide phosphatase	Q92562	9896	FIG4
6951-26_3	ASIC4	Acid-sensing ion channel 4	Q96FT7	55515	ASIC4
6955-68_3	SNX1	Sorting nexin-1	Q13596	6642	SNX1
6956-37_3	FAF2	FAS-associated factor 2	Q96CS3	23197	FAF2
6963-82_3	SELPL	P-selectin glycoprotein ligand 1	Q14242	6404	SELPLG
6965-19_3	CNTP2	Contactin-associated protein-like 2	Q9UHC6	26047	CNTNAP2
6966-144_3	STX1B	Syntaxin-1B	P61266	112755	STX1B
6969-14_3	WFDC5	WAP four-disulfide core domain protein 5	Q8TCV5	149708	WFDC5
6974-6_3	HG2A	HLA class II histocompatibility antigen gamma chain	P04233	972	CD74
6975-52_3	SNAPN	SNARE-associated protein Snapin	O95295	23557	SNAPIN
6984-6_3	IGSF8	Immunoglobulin superfamily member 8	Q969P0	93185	IGSF8
6986-17_3	HS3SB	Heparan sulfate glucosamine 3-O-sulfotransferase 3B1	Q9Y662	9953	HS3ST3B1
6990-44_3	SDF2L	Stromal cell-derived factor 2-like protein 1	Q9HCN8	23753	SDF2L1
6991-24_3	FUT9	Alpha-(1,3)-fucosyltransferase 9	Q9Y231	10690	FUT9
6993-8_3	5'-Nucleotidase	5'-Nucleotidase	P21589	4907	NT5E
6994-19_3	CC018	Uncharacterized protein C3orf18	Q9UK00	51161	C3orf18
6997-32_3	RAB26	Ras-related protein Rab-26	Q9ULW5	25837	RAB26
6998-106_3	HAAH	Aspartyl/asparaginyl beta-hydroxylase	Q12797	444	ASPH
7002-1_3	MXRA8	Matrix-remodeling-associated protein 8	Q9BRK3	54587	MXRA8
7003-4_3	GLT10	Polypeptide N-acetylgalactosaminyltransferase 10	Q86SR1	55568	GALNT10
7008-13_3	F176C	Protein eva-1 homolog C	P58658	59271	EVA1C
7011-8_3	KCIP4	Kv channel-interacting protein 4	Q6PIL6	80333	KCNIP4
7014-27_3	LRC19	Leucine-rich repeat-containing protein 19	Q9H756	64922	LRRC19
7015-8_3	LIRB5	Leukocyte immunoglobulin-like receptor subfamily B member 5	O75023	10990	LILRB5
7016-12_3	GCNT1	Beta-1,3-galactosyl-O-glycosyl-glycoprotein beta-1,6-N-acetylglucosaminyltransferase	Q02742	2650	GCNT1
7018-10_3	TSR3	Ribosome biogenesis protein TSR3 homolog	Q9UJK0	115939	TSR3
7019-13_3	Semaphorin-7A	Semaphorin-7A	O75326	8482	SEMA7A
7020-13_3	CHST5	Carbohydrate sulfotransferase 5	Q9GZS9	23563	CHST5
7034-4_3	SGCB	Beta-sarcoglycan	Q16585	6443	SGCB
7038-45_3	SIA8D	CMP-N-acetylneuraminate-poly-alpha-2,8-sialyltransferase	Q92187	7903	ST8SIA4
7045-4_3	BNIP3	BCL2/adenovirus E1B 19 kDa protein-interacting protein 3	Q12983	664	BNIP3
7049-2_3	ADAM 23	Disintegrin and metalloproteinase domain-containing protein 23	O75077	8745	ADAM23
7050-5_3	NEGR1	Neuronal growth regulator 1	Q7Z3B1	257194	NEGR1
7054-87_3	CLC2D	C-type lectin domain family 2 member D	Q9UHP7	29121	CLEC2D
7057-18_3	SHSA3	Protein shisa-3 homolog	A0PJX4	152573	SHISA3
7059-14_3	LIRA6	Leukocyte immunoglobulin-like receptor subfamily A member 6	Q6PI73	11025	LILRA6
7060-2_3	ERO1A	ERO1-like protein alpha	Q96HE7	30001	ERO1L
7064-2_4	VAMP8	Vesicle-associated membrane protein 8	Q9BV40	8673	VAMP8
7065-1_4	G6B	Protein G6b	O95866	80739	G6B
7066-199_4	F209B	Protein FAM209B	Q5JX69	388799	FAM209B
7069-9_4	TSNA1	t-SNARE domain-containing protein 1	Q96NA8	203062	TSNARE1
7070-25_4	KELL	Kell blood group glycoprotein	P23276	3792	KEL
7071-23_4	MA1B1	Endoplasmic reticulum mannosyl-oligosaccharide 1,2-alpha-mannosidase	Q9UKM7	11253	MAN1B1
7073-69_4	CV015	Uncharacterized protein C22orf15	Q8WYQ4	150248	C22orf15
7077-9_4	CLC4E	C-type lectin domain family 4 member E	Q9ULY5	26253	CLEC4E
7081-2_4	BT3A1	Butyrophilin subfamily 3 member A1	O00481	11119	BTN3A1
7082-2_3	B3GN6	UDP-GlcNAc:betaGal beta-1,3-N-acetylglucosaminyltransferase 6	Q6ZMB0	11041	B3GNT6
7083-74_3	MATN4	Matrilin-4	O95460	8785	MATN4
7084-1_3	DRAXI	Draxin	Q8NBI3	374946	DRAXIN
7085-81_3	CDSN	Corneodesmosin	Q15517	1041	CDSN
7089-42_3	SYT11	Synaptotagmin-11	Q9BT88	23208	SYT11
7090-17_3	GALT1	Polypeptide N-acetylgalactosaminyltransferase 1	Q10472	2589	GALNT1
7092-7_3	PDILT	Protein disulfide-isomerase-like protein of the testis	Q8N807	204474	PDILT
7093-20_3	NRX3B	Neurexin-3-beta	Q9HDB5	9369	NRXN3
7096-30_3	RMD1	Regulator of microtubule dynamics protein 1	Q96DB5	51115	RMDN1
7097-8_3	CDY1	Testis-specific chromodomain protein Y 1	Q9Y6F8	9085	CDY1
7099-33_3	FSTL5	Follistatin-related protein 5	Q8N475	56884	FSTL5
7100-31_3	CD2	T-cell surface antigen CD2	P06729	914	CD2
7106-37_3	PLACL	Oocyte-secreted protein 2	Q86WS3	219990	OOSP2
7108-7_3	CS077	Small integral membrane protein 24	O75264	284422	SMIM24
7110-2_3	DJB11	DnaJ homolog subfamily B member 11	Q9UBS4	51726	DNAJB11
7113-1_3	GRPE1	GrpE protein homolog 1, mitochondrial	Q9HAV7	80273	GRPEL1
7115-5_3	Semenogelin	Semenogelin-1	P04279	6406	SEMG1
7116-31_3	OSCAR	Osteoclast-associated immunoglobulin-like receptor	Q8IYS5	126014	OSCAR
7117-21_3	SPI2	Serpin I2	O75830	5276	SERPINI2
7118-24_3	IGDC3	Immunoglobulin superfamily DCC subclass member 3	Q8IVU1	9543	IGDCC3
7121-2_3	SYT7	Synaptotagmin-7	O43581	9066	SYT7
7123-25_3	RM52	39S ribosomal protein L52, mitochondrial	Q86TS9	122704	MRPL52
7124-18_3	IL-21	Interleukin-21	Q9HBE4	59067	IL21
7125-4_3	RIC3	Protein RIC-3	Q7Z5B4	79608	RIC3
7132-55_3	C1QL4	Complement C1q-like protein 4	Q86Z23	338761	C1QL4
7134-14_3	Apoptosis regulator Bcl-W	Bcl-2-like protein 2	Q92843	599	BCL2L2
7137-8_3	MSRA	Mitochondrial peptide methionine sulfoxide reductase	Q9UJ68	4482	MSRA
7139-14_3	SLIK4	SLIT and NTRK-like protein 4	Q8IW52	139065	SLITRK4
7140-1_3	ELA2A	Chymotrypsin-like elastase family member 2A	P08217	63036	CELA2A
7141-21_3	MGT4B	Alpha-1,3-mannosyl-glycoprotein 4-beta-N-acetylglucosaminyltransferase B	Q9UQ53	11282	MGAT4B
7143-9_3	GNT2C	N-acetyllactosaminide beta-1,6-N-acetylglucosaminyl-transferase, isoform C	Q8NFS9	2651	GCNT2
7145-1_3	ITIH3	Inter-alpha-trypsin inhibitor heavy chain H3	Q06033	3699	ITIH3
7148-42_3	F173A	Protein FAM173A	Q9BQD7	65990	FAM173A
7152-5_3	TIMD3	Hepatitis A virus cellular receptor 2	Q8TDQ0	84868	HAVCR2
7153-66_3	NGRN	Neugrin	Q9NPE2	51335	NGRN
7154-92_3	CF058	UPF0762 protein C6orf58	Q6P5S2	352999	C6orf58
7155-46_3	C4b-binding protein beta chain	C4b-binding protein beta chain	P20851	725	C4BPB
7156-2_3	FUT10	Alpha-(1,3)-fucosyltransferase 10	Q6P4F1	84750	FUT10
7157-22_3	PCDA4	Protocadherin alpha-4	Q9UN74	56144	PCDHA4
7161-25_3	G6PE	GDH/6PGL endoplasmic bifunctional protein	O95479	9563	H6PD
7167-102_3	VAPA	Vesicle-associated membrane protein-associated protein A	Q9P0L0	9218	VAPA
7173-141_3	T132C	Transmembrane protein 132C	Q8N3T6	92293	TMEM132C
7174-15_3	CD38	ADP-ribosyl cyclase/cyclic ADP-ribose hydrolase 1	P28907	952	CD38
7178-59_3	DEPP	Protein DEPP	Q9NTK1	11067	DEPP
7179-69_3	NFASC	Neurofascin	O94856	23114	NFASC
7180-114_3	IFN14	Interferon alpha-14	P01570	3448	IFNA14
7181-17_3	VAPB	Vesicle-associated membrane protein-associated protein B/C	O95292	9217	VAPB
7183-102_3	TD26	Betatrophin	Q6UXH0	55908	C19orf80
7185-29_3	GPV	Platelet glycoprotein V	P40197	2814	GP5
7186-111_3	STX3	Syntaxin-3	Q13277	6809	STX3
7187-3_3	PPM1L	Protein phosphatase 1L	Q5SGD2	151742	PPM1L
7189-55_3	CHST3	Carbohydrate sulfotransferase 3	Q7LGC8	9469	CHST3
7191-32_3	SLMAP	Sarcolemmal membrane-associated protein	Q14BN4	7871	SLMAP
7192-37_3	CRF2-12	Interferon lambda receptor 1	Q8IU57	163702	IFNLR1
7194-36_3	NPTN	Neuroplastin	Q9Y639	27020	NPTN
7196-21_3	IFN-w	Interferon omega-1	P05000	3467	IFNW1
7197-2_3	DJC15	DnaJ homolog subfamily C member 15	Q9Y5T4	29103	DNAJC15
7198-197_3	FA20B	Glycosaminoglycan xylosylkinase	O75063	9917	FAM20B
7200-4_3	LRFN2	Leucine-rich repeat and fibronectin type-III domain-containing protein 2	Q9ULH4	57497	LRFN2
7201-5_3	ISCU	Iron-sulfur cluster assembly enzyme ISCU, mitochondrial	Q9H1K1	23479	ISCU
7202-107_3	SEMA6C	Semaphorin-6C	Q9H3T2	10500	SEMA6C
7203-125_3	RFNG	Beta-1,3-N-acetylglucosaminyltransferase radical fringe	Q9Y644	5986	RFNG
7204-1_3	CEA21	Carcinoembryonic antigen-related cell adhesion molecule 21	Q3KPI0	90273	CEACAM21
7206-20_3	F16P1	Fructose-1,6-bisphosphatase 1	P09467	2203	FBP1
7208-60_3	MGT4C	Alpha-1,3-mannosyl-glycoprotein 4-beta-N-acetylglucosaminyltransferase C	Q9UBM8	25834	MGAT4C
7210-25_3	Amyloid-like protein 1	Amyloid-like protein 1	P51693	333	APLP1
7211-2_3	RNase 1	Ribonuclease pancreatic	P07998	6035	RNASE1
7215-18_3	NADH-cytochrome b5 reductase	NADH-cytochrome b5 reductase 3	P00387	1727	CYB5R3
7218-87_3	AT1B2	Sodium/potassium-transporting ATPase subunit beta-2	P14415	482	ATP1B2
7219-152_3	LICH	Lysosomal acid lipase/cholesteryl ester hydrolase	P38571	3988	LIPA
7223-60_3	S100A13	Protein S100-A13	Q99584	6284	S100A13
7224-11_3	TRAT1	T-cell receptor-associated transmembrane adapter 1	Q6PIZ9	50852	TRAT1
7225-51_3	MMGT1	Membrane magnesium transporter 1	Q8N4V1	93380	MMGT1
7227-75_3	COCH	Cochlin	O43405	1690	COCH
7228-2_3	SIA7F	Alpha-N-acetylgalactosaminide alpha-2,6-sialyltransferase 6	Q969X2	30815	ST6GALNAC6
7231-37_3	TM11A	Transmembrane protease serine 11A	Q6ZMR5	339967	TMPRSS11A
7233-73_3	P2RX6	P2X purinoceptor 6	O15547	9127	P2RX6
7234-12_3	GT252	Procollagen galactosyltransferase 2	Q8IYK4	23127	COLGALT2
7239-9_3	GST M1-1	Glutathione S-transferase Mu 1	P09488	2944	GSTM1
7241-12_3	CD3-zeta	T-cell surface glycoprotein CD3 zeta chain	P20963	919	CD247
7242-14_3	CJ072	V-set and transmembrane domain-containing protein 4	Q8IW00	196740	VSTM4
7243-8_3	IFN-b	Interferon beta	P01574	3456	IFNB1
7244-16_3	TM149	IGF-like family receptor 1	Q9H665	79713	IGFLR1
7245-2_3	CELF2	CUGBP Elav-like family member 2	O95319	10659	CELF2
7247-1_3	GORAB	RAB6-interacting golgin	Q5T7V8	92344	GORAB
7251-64_3	C1QT3	Complement C1q tumor necrosis factor-related protein 3	Q9BXJ4	114899	C1QTNF3
7253-6_3	QKI	Protein quaking	Q96PU8	9444	QKI
7257-18_3	TIP39	Tuberoinfundibular peptide of 39 residues	Q96A98	113091	PTH2
7262-191_3	CHSTE	Carbohydrate sulfotransferase 14	Q8NCH0	113189	CHST14
7265-32_3	OSTN	Osteocrin	P61366	344901	OSTN
7266-4_3	SPA9	Serpin A9	Q86WD7	327657	SERPINA9
7267-2_3	LCB2	Serine palmitoyltransferase 2	O15270	9517	SPTLC2
7268-12_3	IFNA4	Interferon alpha-4	P05014	3441	IFNA4
7624-19_3	ANK2	Ankyrin-2	Q01484	287	ANK2
7625-27_3	14-3-3 protein theta	14-3-3 protein theta	P27348	10971	YWHAQ
7628-40_3	CREL1	Cysteine-rich with EGF-like domain protein 1	Q96HD1	78987	CRELD1
7638-30_3	Lectin, mannose-binding 2	Vesicular integral-membrane protein VIP36	Q12907	10960	LMAN2
7640-29_3	LRP1B	Low-density lipoprotein receptor-related protein 1B	Q9NZR2	53353	LRP1B
7648-9_3	MYPC1	Myosin-binding protein C, slow-type	Q00872	4604	MYBPC1
7655-11_3	N-terminal pro-BNP	N-terminal pro-BNP	P16860	4879	NPPB
7660-21_3	Tropomyosin 4	Tropomyosin alpha-4 chain	P67936	7171	TPM4
7693-13_3	TRAIL R2	Tumor necrosis factor receptor superfamily member 10B	O14763	8795	TNFRSF10B
7696-104_3	NBR1	Next to BRCA1 gene 1 protein	Q14596	4077	NBR1
7732-45_3	VAMP4	Vesicle-associated membrane protein 4	O75379	8674	VAMP4
7735-17_3	PEDF	Pigment epithelium-derived factor	P36955	5176	SERPINF1
7736-28_3	OPALI	Opalin	Q96PE5	93377	OPALIN
7738-299_3	STX2	Syntaxin-2	P32856	2054	STX2
7740-33_3	FATE1	Fetal and adult testis-expressed transcript protein	Q969F0	89885	FATE1
7742-11_3	RN148	RING finger protein 148	Q8N7C7	378925	RNF148
7743-5_3	TIM50	Mitochondrial import inner membrane translocase subunit TIM50	Q3ZCQ8	92609	TIMM50
7745-3_3	ZCD1	CDGSH iron-sulfur domain-containing protein 1	Q9NZ45	55847	CISD1
7746-230_3	NCAM1	Neural cell adhesion molecule 1	P13591	4684	NCAM1
7747-47_3	NDUBB	NADH dehydrogenase [ubiquinone] 1 beta subcomplex subunit 11, mitochondrial	Q9NX14	54539	NDUFB11
7748-11_3	NDUV2	NADH dehydrogenase [ubiquinone] flavoprotein 2, mitochondrial	P19404	4729	NDUFV2
7751-121_3	SARP-1	Secreted frizzled-related protein 2	Q96HF1	6423	SFRP2
7752-31_3	CLC4D	C-type lectin domain family 4 member D	Q8WXI8	338339	CLEC4D
7753-21_3	HTAI2	Oxidoreductase HTATIP2	Q9BUP3	10553	HTATIP2
7755-37_3	ITB5	Integrin beta-5	P18084	3693	ITGB5
7756-37_3	KLRF1	Killer cell lectin-like receptor subfamily F member 1	Q9NZS2	51348	KLRF1
7757-5_3	DQA2	HLA class II histocompatibility antigen, DQ alpha 2 chain	P01906	3118	HLA-DQA2
7758-217_3	RN215	RING finger protein 215	Q9Y6U7	200312	RNF215
7762-30_3	SNN	Stannin	O75324	8303	SNN
7765-15_3	ITM2A	Integral membrane protein 2A	O43736	9452	ITM2A
7766-25_3	ZP4	Zona pellucida sperm-binding protein 4	Q12836	57829	ZP4
7767-1_3	CF126	Colipase-like protein 2	Q6UWE3	389383	CLPSL2
7768-10_3	CBPM	Carboxypeptidase M	P14384	1368	CPM
7769-29_3	3BP2	SH3 domain-binding protein 2	P78314	6452	SH3BP2
7770-25_3	NFU1	NFU1 iron-sulfur cluster scaffold homolog, mitochondrial	Q9UMS0	27247	NFU1
7773-20_3	KI2L2	Killer cell immunoglobulin-like receptor 2DL2	P43627	3803	KIR2DL2
7775-15_3	Kallikrein 11	Kallikrein-11	Q9UBX7	11012	KLK11
7776-20_3	UNC5B	Netrin receptor UNC5B	Q8IZJ1	219699	UNC5B
7778-104_3	BINCA	Bcl10-interacting CARD protein	Q96LW7	84270	C9orf89
7779-86_3	CHSTB	Carbohydrate sulfotransferase 11	Q9NPF2	50515	CHST11
7780-34_3	PACAP	Marginal zone B- and B1-cell-specific protein	Q8WU39	51237	PACAP
7782-34_3	EP3B	Epididymal secretory protein E3-beta	P56851	64184	EDDM3B
7784-1_3	Kininogen, HMW	Kininogen-1	P01042	3827	KNG1
7785-1_3	Ephrin-B3	Ephrin-B3	Q15768	1949	EFNB3
7786-83_3	CLC2B	C-type lectin domain family 2 member B	Q92478	9976	CLEC2B
7787-25_3	LIRA5	Leukocyte immunoglobulin-like receptor subfamily A member 5	A6NI73	353514	LILRA5
7788-1_3	CF6	ATP synthase-coupling factor 6, mitochondrial	P18859	522	ATP5J
7789-182_3	PRDX4	Peroxiredoxin-4	Q13162	10549	PRDX4
7790-21_3	LIF	Leukemia inhibitory factor	P15018	3976	LIF
7792-58_3	CC90B	Coiled-coil domain-containing protein 90B, mitochondrial	Q9GZT6	60492	CCDC90B
7795-14_3	NKG2E	NKG2-E type II integral membrane protein	Q07444	3823	KLRC3
7796-10_3	CD79A	B-cell antigen receptor complex-associated protein alpha chain	P11912	973	CD79A
7797-11_3	CC167	Coiled-coil domain-containing protein 167	Q9P0B6	154467	CCDC167
7799-3_3	KI2LA	Killer cell immunoglobulin-like receptor 2DL5A	Q8N109	57292	KIR2DL5A
7800-85_3	N2DL4	NKG2D ligand 4	Q8TD07	135250	RAET1E
7801-30_3	FAM107B	Protein FAM107B	Q9H098	83641	FAM107B
7802-53_3	NSG1	Neuron-specific protein family member 1	P42857	27065	NSG1
7803-4_3	CHST1	Carbohydrate sulfotransferase 1	O43916	8534	CHST1
7805-52_3	GOS-28	Golgi SNAP receptor complex member 1	O95249	9527	GOSR1
7806-33_3	B4GT7	Beta-1,4-galactosyltransferase 7	Q9UBV7	11285	B4GALT7
7808-5_3	GLCE	D-glucuronyl C5-epimerase	O94923	26035	GLCE
7809-22_3	SPAT9	Spermatogenesis-associated protein 9	Q9BWV2	83890	SPATA9
7810-20_3	C1QTNF5	Complement C1q tumor necrosis factor-related protein 5	Q9BXJ0	114902	C1QTNF5
7815-49_3	IBPL1	Insulin-like growth factor-binding protein-like 1	Q8WX77	347252	IGFBPL1
7816-23_3	TMM27	Collectrin	Q9HBJ8	57393	TMEM27
7817-36_3	CCNC	Cyclin-C	P24863	892	CCNC
7818-101_3	GBP6	Guanylate-binding protein 6	Q6ZN66	163351	GBP6
7821-6_3	C1D	Nuclear nucleic acid-binding protein C1D	Q13901	10438	C1D
7822-11_3	HRSL2	HRAS-like suppressor 2	Q9NWW9	54979	HRASLS2
7823-22_3	SIA7B	Alpha-N-acetylgalactosaminide alpha-2,6-sialyltransferase 2	Q9UJ37	10610	ST6GALNAC2
7824-88_3	MSRB3	Methionine-R-sulfoxide reductase B3	Q8IXL7	253827	MSRB3
7825-7_3	ABD12	Monoacylglycerol lipase ABHD12	Q8N2K0	26090	ABHD12
7826-1_3	DCLK3	Serine/threonine-protein kinase DCLK3	Q9C098	85443	DCLK3
7827-20_3	ADA32	Disintegrin and metalloproteinase domain-containing protein 32	Q8TC27	203102	ADAM32
7832-181_3	Protein disulfide isomerase A3	Protein disulfide-isomerase A3	P30101	2923	PDIA3
7835-2_3	BNI3L	BCL2/adenovirus E1B 19 kDa protein-interacting protein 3-like	O60238	665	BNIP3L
7838-27_3	SMR3A	Submaxillary gland androgen-regulated protein 3A	Q99954	26952	SMR3A
7839-99_3	F19A3	Protein FAM19A3	Q7Z5A8	284467	FAM19A3
7840-64_3	LGMN	Legumain	Q99538	5641	LGMN
7841-84_3	ESAM	Endothelial cell-selective adhesion molecule	Q96AP7	90952	ESAM
[truncated: 874 more rows]
