# Supplementary material for: Discovery and validation of a prognostic proteomic signature for tuberculosis progression: A prospective cohort study
Source: PLoS Med. 2019 Apr 16;16(4):e1002781. doi: 10.1371/journal.pmed.1002781 (PMC6467365; doi:10.1371/journal.pmed.1002781)
Supplement: S5 Table — ACS, Adolescent Cohort Study; bhFDR, Benjamini–Hochberg False Discovery Rate. (XLSX) [file pmed.1002781.s011.xlsx]

## Sheet: S5_Data. Training_prot_rank
S5_Data. Differential protein abundances between progressors and non-progressors in the training set from the Adolescent Cohort Study, ranked by ascending Banjamini-Hochberg false discovery rate (FDR).
SOMAmer	Target	logFC_mean	logFC_median	KS_dist	p_val	FDR	Bonferroni
4336-2_1	SAA	0.208314	-0.578948	0.111584	0.649357	0.775126	1864.95
3714-49_2	CK-MB	-0.892103	-0.528211	0.366298	1.65666e-05	0.00115891	0.0475793
7648-9_3	MYPC1	-0.905862	-0.51419	0.279822	0.00216485	0.0253774	6.21746
2743-5_2	Sonic Hedgehog	-0.278492	-0.427686	0.291516	0.00120892	0.0177143	3.472
9999-1_3	IRF6	-0.571569	-0.418455	0.397117	2.12872e-06	0.000380477	0.00611369
5358-3_3	OMD	-0.339438	-0.373903	0.241661	0.0122789	0.0700617	35.2649
7210-25_3	Amyloid-like protein 1	-0.262134	-0.35727	0.269307	0.00358193	0.0345212	10.2873
10339-48_3	NSE	-0.385185	-0.348856	0.266679	0.00405024	0.0370455	11.6323
8973-23_3	FCRL4	-0.231157	-0.346117	0.381526	6.13636e-06	0.000704945	0.0176236
3212-30_3	ASAH2	-0.63107	-0.338179	0.259518	0.00562595	0.0451269	16.1577
7762-30_3	SNN	-0.252484	-0.335184	0.208212	0.0456109	0.152319	130.995
8219-14_3	ZG16	-0.16102	-0.325974	0.131164	0.441158	0.620169	1267.01
7083-74_3	MATN4	-0.209789	-0.32056	0.256345	0.00648907	0.0487869	18.6366
5725-1_3	OMD	-0.337002	-0.318714	0.264594	0.004461	0.0390609	12.812
3431-54_2	EphA1	-0.181174	-0.314379	0.256345	0.00648907	0.0487869	18.6366
3799-11_2	Carbonic anhydrase III	-0.417399	-0.302494	0.300308	0.000767907	0.0130499	2.20543
4915-64_2	Hemoglobin	0.0909731	-0.301029	0.238307	0.0141295	0.0747329	40.58
7970-315_3	NAR3	-0.122491	-0.297313	0.308376	0.000500409	0.0104143	1.43717
8773-172_3	EMIL3	-0.0986182	-0.295458	0.249184	0.00889798	0.0582119	25.555
3196-6_2	HPLN1	-0.279588	-0.29058	0.190537	0.0843316	0.223226	242.2
4491-4_2	IL-5 Ra	-0.161978	-0.283584	0.258974	0.00576602	0.0452459	16.56
2670-67_4	CK-MM	-0.514434	-0.282949	0.372281	1.12689e-05	0.000951888	0.0323642
9076-25_3	PENK	0.0356295	-0.280185	0.251088	0.00818887	0.0559962	23.5184
9545-156_3	Granzyme K	-0.283617	-0.279323	0.254804	0.00695048	0.0507933	19.9618
4969-2_1	Carbonic anhydrase I	-0.216932	-0.276308	0.241479	0.012373	0.0700617	35.5353
7015-8_3	LIRB5	-0.154358	-0.270339	0.267041	0.00398246	0.036777	11.4376
5481-16_3	RASA1	-0.231465	-0.266625	0.312727	0.000395342	0.00887048	1.13542
2705-5_2	TECK	-0.120976	-0.266381	0.18827	0.0908855	0.23622	261.023
10485-56_3	MAGE-4	-0.766685	-0.266288	0.157451	0.229839	0.416466	660.099
8459-10_3	BMP-6	-0.236131	-0.265616	0.356146	3.14068e-05	0.00158246	0.0902003
3000-66_1	MBL	-0.270526	-0.263131	0.192259	0.0796206	0.217574	228.67
10970-3_3	NAR3	-0.114625	-0.260096	0.34409	6.5578e-05	0.00281012	0.18834
5954-62_3	PTH	-0.283525	-0.248749	0.231871	0.0183965	0.0876198	52.8347
9916-146_3	LRC4B	-0.217341	-0.247562	0.292059	0.00117591	0.0174985	3.37722
6434-18_3	Amine oxidase	-0.593173	-0.242834	0.174674	0.139731	0.311817	401.308
9885-41_3	RAP2A	-0.345752	-0.242319	0.188633	0.0898091	0.234058	257.932
3352-80_3	Carbonic anhydrase 6	-0.125463	-0.240132	0.222716	0.0264461	0.109918	75.9532
4961-17_1	annexin II	-0.239244	-0.237559	0.261965	0.00503335	0.0426424	14.4558
6388-21_3	CC126	-0.187593	-0.236515	0.248459	0.00918247	0.0589979	26.372
3397-7_4	SHP-2	-0.179116	-0.23442	0.277012	0.00248137	0.0275154	7.12649
10916-44_3	PLA2R	-0.282619	-0.231692	0.238851	0.0138133	0.0738769	39.6719
8885-6_3	CA2D3	-0.234647	-0.230375	0.330765	0.000143661	0.00458439	0.412595
9997-12_3	UBXN4	-0.252114	-0.228487	0.357052	2.96851e-05	0.00152242	0.0852556
6557-50_3	LRC15	-0.347158	-0.225646	0.208394	0.0453115	0.151849	130.135
5030-52_1	SIRT2	-0.310005	-0.224523	0.358593	2.69631e-05	0.00140797	0.0774382
8974-172_3	COFA1	-0.181303	-0.222328	0.319888	0.000266315	0.00689848	0.764856
7918-114_3	Amylase, alpha 1A	-0.139262	-0.220618	0.213107	0.0381033	0.13645	109.433
2765-4_3	GDF-11	-0.22875	-0.21922	0.282088	0.00193732	0.0241912	5.56397
5360-9_2	PKB beta	-0.253373	-0.218947	0.340736	8.01216e-05	0.00319596	0.230109
9088-20_3	SL9B2	-0.152452	-0.213232	0.211385	0.0406117	0.142414	116.637
8891-7_3	CPVL	-1.03547	-0.213048	0.237854	0.014398	0.0755959	41.351
2819-23_2	Cadherin-5	-0.0896251	-0.20652	0.256889	0.00633301	0.0483734	18.1884
4249-64_2	NDP kinase B	-0.198754	-0.202888	0.236041	0.0155182	0.0791619	44.5681
9761-89_3	LDHA	-0.166087	-0.201793	0.204315	0.0524766	0.165437	150.713
2828-82_2	HAI-1	0.020914	-0.200631	0.202955	0.0550729	0.171179	158.169
2418-55_9	Apo E	-0.199264	-0.20055	0.280547	0.00208948	0.0253206	6.00098
8766-29_3	LIRA5	-0.0757623	-0.200402	0.256526	0.00643666	0.0486476	18.4861
4328-2_2	BOC	-0.487521	-0.19724	0.266497	0.00408453	0.0372013	11.7308
5636-10_3	MFAP4	-0.257526	-0.196406	0.178481	0.124284	0.289963	356.944
3204-2_2	LKHA4	-0.318817	-0.189684	0.272299	0.00310997	0.0316732	8.93184
9068-17_3	JKIP3	-0.288044	-0.187763	0.326233	0.00018626	0.00529641	0.534938
3290-50_2	CD109	-0.140312	-0.186338	0.21347	0.0375928	0.135466	107.966
7100-31_3	CD2	-0.429825	-0.183702	0.171682	0.152928	0.327524	439.21
6049-64_3	PTPRS	-0.18301	-0.183528	0.362944	2.05054e-05	0.00125301	0.0588914
3166-92_1	Siglec-3	-0.0562018	-0.183362	0.154278	0.25043	0.437225	719.235
10511-10_3	Collagen alpha-3(VI)	-0.253044	-0.18238	0.178662	0.123585	0.289743	354.936
10552-88_3	NKG2F	-0.255705	-0.180836	0.303481	0.000649766	0.0119624	1.86613
8043-153_3	COMP	-0.168841	-0.180046	0.259336	0.00567229	0.0451269	16.2908
10462-14_3	INSL5	-0.136142	-0.180024	0.161168	0.207373	0.389011	595.576
5457-5_2	COLEC12	-0.188027	-0.179376	0.197516	0.0665923	0.19299	191.253
4569-52_2	SORC2	-1.62879	-0.17892	0.172861	0.147615	0.321906	423.95
4160-49_1	MMP-2	-0.216203	-0.17866	0.314449	0.000359801	0.0084012	1.03335
4124-24_2	HSP 70	-0.130593	-0.178334	0.300308	0.000767907	0.0130499	2.20543
5036-50_1	TSG-6	-0.13703	-0.178306	0.203136	0.0547205	0.170452	157.157
4314-12_2	XTP3A	-0.204014	-0.177337	0.297317	0.000897463	0.0143995	2.57751
2630-12_2	IL-1 R AcP	-0.117392	-0.177331	0.228517	0.0210483	0.0956498	60.4506
10696-217_3	LPPRC	-0.226902	-0.176479	0.266316	0.00411908	0.0372013	11.83
6556-5_3	ENPP5	-0.272579	-0.175158	0.27103	0.00330272	0.0328215	9.4854
8337-65_3	PTPRU	0.0516487	-0.172973	0.218183	0.0314807	0.123025	90.4127
3853-56_1	MDHC	-0.236678	-0.172901	0.298949	0.000824459	0.0137665	2.36785
9459-7_3	Fas, soluble	-0.113391	-0.172796	0.217186	0.0326954	0.125202	93.9011
10366-11_3	PDGFRA	-0.0946948	-0.170951	0.27529	0.00269599	0.0286773	7.74288
5691-2_3	CRLD2	0.0233066	-0.169211	0.122462	0.530113	0.683648	1522.48
10677-9_3	NDUB4	-0.180927	-0.168738	0.280185	0.00212686	0.0253608	6.10833
5864-10_3	aldolase A	-0.244069	-0.16753	0.277194	0.00245972	0.0273811	7.06432
10554-23_3	BGAL	-0.183948	-0.166984	0.161258	0.206847	0.388278	594.065
6373-54_3	SEMG2	-0.007271	-0.166791	0.158539	0.223081	0.408864	640.69
3461-58_1	PGCB	-0.123646	-0.166724	0.322879	0.000225203	0.00610172	0.646782
6234-74_3	VITRN	-0.223242	-0.166054	0.255167	0.0068393	0.0507557	19.6425
8923-94_3	GLTL1	-0.0970925	-0.16569	0.280547	0.00208948	0.0253206	6.00098
4306-4_2	Transketolase	-0.192158	-0.164991	0.326595	0.000182454	0.00529301	0.524008
3707-12_2	Albumin	-0.215102	-0.16406	0.335116	0.000111586	0.00377028	0.320474
8005-1_3	MXRA7	-0.170327	-0.161275	0.26822	0.00376931	0.0357276	10.8255
7251-64_3	C1QT3	-0.241111	-0.161224	0.358956	2.63583e-05	0.00140797	0.0757009
5491-12_3	Testican-2	-0.129519	-0.160977	0.256526	0.00643666	0.0486476	18.4861
2797-56_2	Apo B	-0.214508	-0.160912	0.211929	0.0398045	0.14044	114.318
9322-15_3	RCN1	-0.208354	-0.159847	0.298405	0.000848152	0.0139194	2.43589
10723-41_3	WDR1	-0.583677	-0.159547	0.338107	9.3613e-05	0.00344688	0.268856
3280-49_2	Aggrecan	-0.0740039	-0.159034	0.178299	0.124987	0.290422	358.962
10336-3_3	CHIP	-0.606592	-0.158398	0.203499	0.0540214	0.169008	155.149
8353-15_3	SCN2B	-0.203545	-0.157517	0.312364	0.000403234	0.00890836	1.15809
5470-69_2	MED-1	-0.113765	-0.15684	0.309191	0.000478898	0.0101132	1.3754
9004-24_3	CR001	-0.17222	-0.156627	0.157995	0.226441	0.411868	650.34
10455-196_3	IL-31	-0.154035	-0.156563	0.168328	0.168893	0.345484	485.06
7194-36_3	NPTN	-0.54936	-0.156478	0.211022	0.0411578	0.143453	118.205
2762-30_2	FGF-19	-0.398212	-0.155768	0.207397	0.0469797	0.155239	134.926
2526-53_3	OPG	-0.149477	-0.155601	0.262509	0.00490968	0.0420913	14.1006
8606-39_3	GPNMB	-0.0104006	-0.155412	0.215011	0.0354893	0.131564	101.925
4913-78_1	HCC-4	-0.279943	-0.154373	0.186367	0.0967156	0.247564	277.767
10635-33_3	F159B	-0.160837	-0.154354	0.247099	0.00973822	0.0608003	27.9682
9867-23_3	F16P2	-0.718577	-0.154316	0.208031	0.0459121	0.153147	131.859
8814-33_3	SAPL1	-0.128939	-0.153658	0.252901	0.00756168	0.0532283	21.7171
4535-50_2	BST1	-0.13891	-0.153443	0.257433	0.00618039	0.0478438	17.7501
6324-11_3	DNSL2	-0.0836214	-0.153397	0.298042	0.0008643	0.0140773	2.48227
5742-14_3	PPA6	-0.193801	-0.153114	0.260062	0.005489	0.0449128	15.7644
9377-25_3	SCF	-0.147138	-0.151194	0.236041	0.0155182	0.0791619	44.5681
9590-10_3	COX7R	-1.05092	-0.150455	0.230602	0.0193626	0.0908649	55.6093
5430-66_3	SHPS1	-0.0761385	-0.149776	0.246193	0.0101255	0.0626731	29.0803
3466-8_2	PRKACA	-0.19646	-0.149289	0.19806	0.0653546	0.190171	187.698
8046-9_3	Galectin-1	-0.463187	-0.148946	0.249728	0.00868989	0.0579057	24.9574
5728-60_3	FCRL1	-0.167864	-0.1482	0.20223	0.0565022	0.173741	162.274
9772-153_3	NLGN2	-0.273266	-0.147697	0.296501	0.000936191	0.0149374	2.68874
10447-18_3	PABP3	-0.164061	-0.147277	0.317621	0.000302073	0.00735215	0.867554
3535-84_1	DKK1	0.00646462	-0.146524	0.150109	0.279555	0.465438	802.881
9382-110_3	MO2R1	-0.185479	-0.145518	0.263869	0.0046126	0.0401436	13.2474
3481-87_1	XPNPEP1	-0.243115	-0.145265	0.237491	0.014616	0.0763221	41.9772
8624-16_3	UNC5H4	-0.132259	-0.145012	0.191715	0.0810837	0.218298	232.872
10558-26_3	PCDH9	-0.141027	-0.144994	0.21483	0.0357313	0.131564	102.62
7191-32_3	SLMAP	0.278044	-0.14464	0.195975	0.070208	0.199246	201.637
9297-12_3	B3GN8	-0.148054	-0.144152	0.245286	0.0105266	0.0638944	30.2324
3365-7_2	Dkk-4	-0.0306527	-0.14403	0.129623	0.456325	0.631598	1310.57
9231-23_3	IMPA3	-0.0792733	-0.143747	0.241117	0.0125633	0.0700617	36.0818
9288-7_3	FKBP7	-0.171988	-0.143425	0.221537	0.0276815	0.113088	79.5012
6965-19_3	CNTP2	-0.12782	-0.143285	0.180384	0.117101	0.280495	336.313
8780-2_3	PCD10	-0.458676	-0.14288	0.268129	0.00378533	0.0357614	10.8715
7219-152_3	LICH	-0.110412	-0.142879	0.187908	0.0919727	0.238184	264.146
3325-2_2	MATN2	-0.0846808	-0.141997	0.27384	0.00288989	0.0302912	8.29978
2711-6_2	CNTFR alpha	-0.26565	-0.141377	0.261059	0.00524582	0.0434178	15.066
4962-52_1	ARMEL	-0.136381	-0.137273	0.2781	0.00235408	0.0270437	6.76093
6274-15_3	WSCD2	-0.118756	-0.136464	0.196701	0.0684862	0.195519	196.692
3392-68_2	PKB a/b/g	-0.203438	-0.136066	0.33566	0.000108091	0.00377028	0.310438
9574-11_3	BIN1	-0.587843	-0.135715	0.311367	0.000425708	0.00926237	1.22263
3041-55_2	MRC2	-0.15753	-0.134482	0.215192	0.0352487	0.131564	101.234
9359-9_3	EGFL9	-0.0480505	-0.132459	0.241117	0.0125633	0.0700617	36.0818
4498-62_2	NCAM-120	-0.148719	-0.132412	0.213107	0.0381033	0.13645	109.433
7202-107_3	SEMA6C	-0.0701162	-0.132025	0.242023	0.0120925	0.0697383	34.7297
10025-1_3	DLDH	-0.14449	-0.1319	0.25988	0.00553431	0.0451269	15.8945
8296-117_3	KDEL2	-0.187513	-0.131674	0.259518	0.00562595	0.0451269	16.1577
2686-67_2	IGFBP-6	-0.106073	-0.131506	0.217458	0.0323601	0.124582	92.9382
5029-3_1	SEPR	-0.190999	-0.130828	0.211022	0.0411578	0.143453	118.205
4834-61_2	Epithelial cell kinase	-0.164995	-0.130252	0.261059	0.00524582	0.0434178	15.066
8396-42_3	FAAH2	-0.17503	-0.130013	0.19108	0.0828192	0.220442	237.857
10440-26_3	ACAM	-0.275582	-0.129483	0.260877	0.00528928	0.0435267	15.1908
5035-7_1	TS	-0.575231	-0.129465	0.177302	0.128909	0.294888	370.226
2867-52_2	PKB a/b/g	-0.182652	-0.12694	0.27946	0.00220348	0.025621	6.32839
7795-14_3	NKG2E	-0.0646321	-0.126873	0.167422	0.173427	0.350022	498.081
5115-31_3	RELT	-0.11218	-0.125513	0.213832	0.0370883	0.134492	106.517
8325-37_3	ADH4	-0.0348334	-0.125145	0.124547	0.508116	0.666047	1459.31
9303-9_3	B7-H2	-0.089814	-0.124892	0.139775	0.361786	0.547156	1039.05
4309-59_3	Triosephosphate isomerase	-0.152171	-0.124887	0.295232	0.000999552	0.0157732	2.87071
9847-21_3	TGIF2	-0.235469	-0.124589	0.191262	0.0823202	0.219317	236.424
6936-7_3	PMEPA	-0.137178	-0.123904	0.138053	0.376896	0.558826	1082.45
3389-7_2	PCI	-0.145478	-0.123771	0.306744	0.000546182	0.0107441	1.56863
2942-50_2	Cytochrome c	-0.206853	-0.122763	0.2374	0.014671	0.0764702	42.1351
3169-70_2	IDUA	-0.34164	-0.122626	0.218093	0.0315895	0.123025	90.725
7218-87_3	AT1B2	-0.103794	-0.122557	0.211204	0.0408839	0.143019	117.419
4246-40_2	NCAM-L1	-0.0993173	-0.122459	0.215917	0.0343007	0.129791	98.5116
9756-6_3	TAGL	0.0287608	-0.122209	0.137328	0.383375	0.565513	1101.05
9531-24_3	LST1	-0.0476579	-0.122097	0.152919	0.259661	0.443897	745.747
3495-15_2	GCP-2	0.0522447	-0.121651	0.143673	0.329061	0.515301	945.063
4541-49_2	CDON	-0.169207	-0.121402	0.225163	0.0240351	0.103959	69.0288
9229-9_3	CTRL	0.62261	-0.121334	0.239032	0.0137094	0.0738769	39.3733
10852-114_3	HNRDL	-0.121151	-0.120979	0.180928	0.115112	0.277118	330.602
9753-17_3	Ezrin	-0.141583	-0.120794	0.297861	0.000872482	0.0140773	2.50577
2917-3_2	sRANKL	-0.138738	-0.120696	0.31046	0.000447157	0.00958384	1.28423
3198-4_1	IDS	-0.126174	-0.120204	0.198785	0.063735	0.187548	183.047
7011-8_3	KCIP4	0.149665	-0.119984	0.132886	0.424538	0.605398	1219.27
5084-154_3	IL-17B R	0.100724	-0.119983	0.215011	0.0354893	0.131564	101.925
3378-49_2	Kallikrein 7	-0.228068	-0.118929	0.20504	0.0511356	0.163361	146.861
3607-71_1	DKK3	-0.0965576	-0.118395	0.222716	0.0264461	0.109918	75.9532
9748-31_3	GSTM3-3	0.0491274	-0.118392	0.178481	0.124284	0.289963	356.944
2730-58_2	MICA	-0.0808732	-0.118086	0.216461	0.0336044	0.12783	96.5119
8385-248_3	HGFA	-0.114907	-0.117296	0.142404	0.33949	0.52732	975.015
4459-68_2	PCSK7	-0.0613055	-0.117273	0.149927	0.280872	0.46709	806.664
2590-69_4	ROR1	-0.162822	-0.117067	0.194706	0.0733098	0.205611	210.546
3469-74_1	RPS6KA3	-0.14092	-0.116842	0.165156	0.185182	0.362044	531.843
7139-14_3	SLIK4	-0.144872	-0.116702	0.253535	0.00735271	0.0526608	21.117
10903-50_3	STX8	-0.184507	-0.115535	0.113669	0.626152	0.757502	1798.31
9269-7_3	Biotinidase	-0.053802	-0.114825	0.215736	0.0345356	0.130337	99.1862
8252-2_3	NOTUM	0.158924	-0.114324	0.157088	0.232126	0.419779	666.666
8298-8_3	CG045	-0.512959	-0.114322	0.252901	0.00756168	0.0532283	21.7171
6478-2_3	IGLO5	-0.0878054	-0.11425	0.230602	0.0193626	0.0908649	55.6093
8931-124_3	G0S2	-0.478225	-0.114209	0.180384	0.117101	0.280495	336.313
9045-3_3	S27A2	-0.163481	-0.112383	0.281726	0.00197216	0.024414	5.66405
2615-60_2	Ephrin-A5	-0.0956404	-0.11223	0.238851	0.0138133	0.0738769	39.6719
4152-58_2	Prekallikrein	-0.0174014	-0.111983	0.187908	0.0919727	0.238184	264.146
6285-71_3	K0152	-0.170603	-0.111808	0.196519	0.0689132	0.196348	197.919
6915-2_3	C16L2	-0.311525	-0.110961	0.231871	0.0183965	0.0876198	52.8347
9804-11_3	CO9A2	-0.50105	-0.110692	0.144489	0.322472	0.508868	926.141
4840-73_1	G-CSF	0.0443356	-0.109525	0.149746	0.282193	0.468474	810.46
2752-62_2	BMP-14	-0.588939	-0.109497	0.219815	0.0295786	0.117659	84.9499
8900-28_3	NEO1	-0.127418	-0.109185	0.240029	0.01315	0.0719362	37.7668
3303-23_2	Cystatin M	-0.0895164	-0.109125	0.212563	0.0388804	0.138541	111.664
2937-10_2	Apo E3	-0.162491	-0.10832	0.241298	0.0124678	0.0700617	35.8076
8484-24_3	Leptin	-0.114848	-0.107835	0.154007	0.252256	0.437753	724.481
4964-67_1	ARTS1	-0.0658411	-0.106972	0.134699	0.407435	0.588904	1170.15
10620-21_3	PSP-94	0.0585516	-0.106953	0.111403	0.651376	0.775839	1870.75
10832-24_3	B4GT6	-0.194307	-0.106813	0.230511	0.0194333	0.0908997	55.8124
7853-19_3	SCO1	-0.11296	-0.106683	0.289068	0.0013684	0.019171	3.93005
8042-88_3	ISK9	-0.108323	-0.106593	0.129623	0.456325	0.631598	1310.57
9081-39_3	ZNT3	-0.0724416	-0.106028	0.228154	0.0213544	0.0967348	61.3299
8364-74_3	UST	-0.0624558	-0.105989	0.183738	0.105276	0.261551	302.353
5140-56_3	UNC5H4	-0.128468	-0.10598	0.19942	0.0623461	0.184406	179.058
5108-72_3	Notch-3	-0.0403583	-0.10532	0.17132	0.154594	0.329128	443.993
3708-62_1	a2-Macroglobulin	-0.108261	-0.105081	0.210116	0.042551	0.14618	122.206
5456-59_2	CNDP1	-0.109666	-0.104937	0.133521	0.418505	0.599774	1201.95
5680-54_3	OBP2B	-0.0626063	-0.104571	0.0897389	0.873951	0.925512	2509.99
2871-73_2	RAD51	-0.298869	-0.104421	0.293872	0.00107187	0.0167305	3.07842
9316-67_3	WFDC1	-0.10424	-0.104328	0.144489	0.322472	0.508868	926.141
5343-74_3	CBPE	0.0537408	-0.104291	0.305022	0.000598746	0.0113132	1.7196
8355-80_3	ISM1	-0.356699	-0.104242	0.250453	0.00841932	0.057029	24.1803
5867-60_3	ARGI1	-0.0508618	-0.103106	0.158358	0.224197	0.409081	643.894
4474-19_2	Ubiquitin	-0.263094	-0.103059	0.135062	0.404063	0.584914	1160.47
6963-82_3	SELPL	-0.282978	-0.102796	0.32306	0.000222914	0.00609724	0.64021
4903-72_1	Calcineurin	-0.171878	-0.10276	0.230421	0.0195042	0.0910832	56.0162
8982-65_3	TSP3	-0.115808	-0.102378	0.176124	0.133673	0.302052	383.908
3220-40_2	RET	0.112667	-0.102285	0.185642	0.0990171	0.251661	284.377
7957-2_3	SCG3	-0.108129	-0.101835	0.177937	0.126401	0.291821	363.025
3234-23_2	URB	-0.116509	-0.10149	0.16289	0.197551	0.376239	567.368
8458-16_3	a-Synuclein	-0.231887	-0.101303	0.129442	0.458127	0.633482	1315.74
5484-63_3	RS3A	-0.235772	-0.101079	0.181109	0.114456	0.276697	328.716
6359-50_3	AGO61	-0.49733	-0.100904	0.146755	0.304648	0.491044	874.948
9028-5_3	PAPD1	-0.387731	-0.100662	0.202955	0.0550729	0.171179	158.169
7785-1_3	Ephrin-B3	0.0850406	-0.0990583	0.220631	0.0286661	0.115469	82.3292
9282-12_3	CRIS2	-0.0244618	-0.0989483	0.155004	0.245607	0.431691	705.383
8057-78_3	USE1	-0.355469	-0.0986108	0.318891	0.000281526	0.00703081	0.808543
8402-22_3	CYTL1	-0.0735844	-0.0983714	0.142041	0.34251	0.530004	983.688
2475-1_3	SCF sR	-0.124664	-0.098328	0.217458	0.0323601	0.124582	92.9382
9789-52_3	Nesprin-2	-0.0397936	-0.0983142	0.218002	0.0316986	0.123025	91.0383
9261-14_3	EphB6	-0.0645882	-0.0981422	0.207669	0.0465195	0.154606	133.604
9758-17_3	RS4X	-0.134463	-0.0981395	0.171682	0.152928	0.327524	439.21
2731-29_2	NADPH-P450 Oxidoreductase	0.349864	-0.0980981	0.234862	0.0162876	0.0819229	46.778
8556-5_3	F134B	0.155403	-0.0980757	0.144489	0.322472	0.508868	926.141
3509-1_1	MIP-5	-0.130973	-0.0978077	0.191896	0.0805935	0.218298	231.465
9906-21_3	TICN3	-0.203245	-0.0977901	0.231508	0.018668	0.0883271	53.6146
7655-11_3	N-terminal pro-BNP	0.200722	-0.0968343	0.123731	0.516678	0.6745	1483.9
2755-8_2	C3adesArg	-0.110615	-0.0967859	0.266316	0.00411908	0.0372013	11.83
5124-62_3	sICAM-5	-0.0773899	-0.0966486	0.142404	0.33949	0.52732	975.015
10748-216_3	PCDB2	0.303372	-0.0964674	0.126632	0.486523	0.653858	1397.29
9876-20_3	aldolase C	-0.122536	-0.0959375	0.1657	0.182305	0.359849	523.581
7956-11_3	MOS1	-0.195147	-0.095674	0.107052	0.699708	0.810961	2009.56
2944-66_2	DAN	0.0170257	-0.0955146	0.252991	0.0075315	0.0532283	21.6305
10928-7_3	IL-1F6	-0.223737	-0.0954852	0.201958	0.0570464	0.174853	163.837
5730-60_3	BRAK	-0.0724276	-0.0950447	0.14331	0.332018	0.517956	953.556
5259-2_3	TAK1-TAB1	-0.158298	-0.0945975	0.170957	0.156274	0.331231	448.818
7239-9_3	GST M1-1	0.153605	-0.0942282	0.170776	0.157119	0.332042	451.246
10351-51_3	IRF1	-0.547591	-0.0937324	0.199511	0.0621498	0.184395	178.494
9296-15_3	PTPRD	-0.106892	-0.093577	0.196157	0.0697741	0.198604	200.391
10006-25_3	ELK1	-0.123645	-0.0935415	0.190355	0.0848408	0.224161	243.663
11516-7_3	FABPL	-0.037247	-0.0935309	0.146392	0.307453	0.491377	883.004
8052-115_3	NLGN1	-0.237751	-0.0933581	0.235044	0.016167	0.081746	46.4317
3326-58_2	Nectin-like protein 2	-0.133265	-0.0930706	0.194072	0.0749038	0.208453	215.124
6918-183_3	CCKN	-0.127248	-0.0927786	0.140863	0.352447	0.536422	1012.23
3893-55_2	Mesothelin	-0.184128	-0.0925082	0.254804	0.00695048	0.0507933	19.9618
4220-39_2	FER	-0.238949	-0.0924377	0.106418	0.706707	0.815125	2029.66
5759-10_3	Ephrin-A3	-0.230793	-0.0923942	0.230239	0.0196468	0.0913036	56.4256
5620-13_3	AMD	-0.109382	-0.0923089	0.23731	0.0147261	0.0766186	42.2935
6485-59_3	IGLL1	0.0145595	-0.0920911	0.150925	0.273682	0.458051	786.016
5690-49_3	TUFT1	-0.0755895	-0.0919806	0.262509	0.00490968	0.0420913	14.1006
3235-50_2	WFKN2	-0.0259797	-0.0909203	0.207306	0.0471339	0.155239	135.369
3218-8_2	PSMA	-0.137948	-0.090816	0.28508	0.00167087	0.0222164	4.79875
3459-49_2	PDGF Rb	-0.155141	-0.090743	0.148477	0.29157	0.476331	837.39
9015-1_3	PRG3	-0.0407766	-0.0906768	0.0923677	0.850854	0.914199	2443.65
9087-8_3	NHLC3	0.0968654	-0.0903808	0.283358	0.0018198	0.0233324	5.22645
8379-35_4	IL-9	-0.0998906	-0.0903406	0.236584	0.0151742	0.0781007	43.5802
8295-16_3	NOE2	-0.0156613	-0.08899	0.243202	0.0115043	0.0682112	33.0404
10603-1_3	HIS3	0.275117	-0.0885618	0.130257	0.450047	0.626561	1292.53
7796-10_3	CD79A	-0.389443	-0.0885394	0.251994	0.00786959	0.0544614	22.6015
6372-7_3	YBOX2	-0.111659	-0.0884644	0.177302	0.128909	0.294888	370.226
7742-11_3	RN148	-0.555629	-0.0883204	0.166606	0.177589	0.353945	510.035
3045-72_2	PTN	-0.115597	-0.087846	0.185823	0.0984375	0.25041	282.712
9358-3_3	TGF-a	-0.12617	-0.0876823	0.149474	0.284184	0.470419	816.177
7755-37_3	ITB5	-1.13168	-0.0876291	0.167422	0.173427	0.350022	498.081
5688-65_3	CBLN4	-0.21707	-0.0873677	0.153644	0.254707	0.439351	731.519
7638-30_3	Lectin, mannose-binding 2	-0.02503	-0.0869704	0.14467	0.321021	0.507414	921.971
5715-4_3	ABHEA	-0.0671298	-0.0866779	0.176215	0.133301	0.30145	382.841
9960-2_3	TBCD5	0.0224402	-0.0861957	0.238307	0.0141295	0.0747329	40.58
6629-3_3	HBD-1	-0.0309876	-0.0860319	0.183557	0.105889	0.262393	304.113
4238-4_2	LIN7B	-0.117842	-0.0859689	0.25426	0.00712034	0.0515104	20.4496
10358-33_3	Mcl-1	-0.29584	-0.0856793	0.175671	0.135543	0.304124	389.279
7788-1_3	CF6	-0.0354314	-0.085291	0.130348	0.449153	0.626198	1289.97
3175-51_5	ATS13	-0.0754667	-0.0852537	0.155547	0.242035	0.426719	695.125
4224-7_2	HNRPQ	-0.123911	-0.0851762	0.28091	0.00205271	0.0250867	5.89538
6442-6_3	BAGE3	-0.0879548	-0.0851315	0.277556	0.00241695	0.0273287	6.94148
3009-3_2	TGF-b R III	-0.0346887	-0.0850048	0.167603	0.172512	0.349651	495.455
10491-21_3	MPRD	-0.137072	-0.0845412	0.124547	0.508116	0.666047	1459.31
9366-54_3	IL-21 sR	-0.101515	-0.084242	0.148205	0.293608	0.477758	843.243
5726-49_3	SG11A	-0.119944	-0.0840655	0.221356	0.027876	0.113399	80.0598
10626-116_3	SIA7C	-0.167254	-0.083988	0.261965	0.00503335	0.0426424	14.4558
7196-21_3	IFN-w	2.77805	-0.0839772	0.113397	0.629176	0.759879	1806.99
3890-8_2	LDH-H 1	-0.185104	-0.0839709	0.232052	0.0182621	0.0874144	52.4486
6930-95_3	SIA8F	-0.0367008	-0.083888	0.173405	0.145213	0.317875	417.052
9038-12_3	JTB	0.148987	-0.0838133	0.177937	0.126401	0.291821	363.025
9964-10_3	MYZAP	-0.471253	-0.0835776	0.129351	0.45903	0.634119	1318.33
5634-39_3	OFUT1	-0.118556	-0.0835602	0.160442	0.211619	0.394912	607.77
2822-56_2	CD97	-0.105734	-0.0834966	0.271936	0.00316396	0.0319961	9.08688
3581-53_3	a2-HS-Glycoprotein	-0.041189	-0.0833931	0.223622	0.0255293	0.107824	73.3201
11102-22_3	REG4	-0.127352	-0.0833689	0.140954	0.351676	0.536386	1010.01
8925-25_3	RIR2B	-0.0103861	-0.0832076	0.239757	0.0133005	0.0723465	38.199
9287-6_3	SPRE	-0.317485	-0.0822753	0.164975	0.186149	0.363439	534.619
5698-60_3	Tenascin-X	-0.0792931	-0.082254	0.184373	0.103154	0.258516	296.259
4135-84_2	IgE	0.0883894	-0.0822474	0.0706128	0.981544	0.991208	2818.99
5483-1_3	RGMA	-0.102728	-0.0822404	0.1657	0.182305	0.359849	523.581
5312-49_3	Apo E2	-0.114112	-0.082148	0.250272	0.00848623	0.0570784	24.3725
3727-35_1	PYY	-0.0608412	-0.0821247	0.128082	0.471761	0.642465	1354.9
9394-19_3	Aminopeptidase	-0.0059132	-0.081884	0.217005	0.0329206	0.125729	94.5479
3506-49_1	Lymphotoxin a2/b1	-0.09757	-0.0816791	0.285805	0.00161162	0.0218252	4.62859
7926-13_3	SPIT3	-0.541889	-0.0816291	0.139956	0.360219	0.54536	1034.55
3339-33_1	TSP2	-0.0879939	-0.0814732	0.121555	0.539791	0.692399	1550.28
6390-18_3	NPS	-0.0942247	-0.0813695	0.292241	0.0011651	0.0174279	3.34616
7253-6_3	QKI	-0.314066	-0.0812025	0.146664	0.305347	0.491044	876.957
2827-23_2	Fractalkine/CX3CL-1	-0.0532865	-0.0809352	0.192621	0.0786577	0.216177	225.905
9900-36_3	NFH	-0.255939	-0.0808292	0.252719	0.00762237	0.0533938	21.8915
6525-17_3	DUSP13	0.138137	-0.0807384	0.185823	0.0984375	0.25041	282.712
5963-9_3	Dermokine	-0.066007	-0.0807305	0.192803	0.0781799	0.21507	224.533
3343-1_4	Aminoacylase-1	-0.155338	-0.0804052	0.135787	0.397371	0.577556	1141.25
8289-8_3	GPNMB	-0.0614166	-0.0803337	0.190899	0.0833208	0.220958	239.297
9854-36_3	Aldose reductase	-0.0793782	-0.0803032	0.200145	0.0607905	0.183013	174.59
5012-67_1	Myokinase, human	-0.236271	-0.0802997	0.146211	0.308862	0.492806	887.051
4775-34_3	Gelsolin	-0.0973781	-0.0802419	0.197335	0.0670092	0.193633	192.451
2973-15_2	CD36 ANTIGEN	-0.0100642	-0.0795909	0.224982	0.0242068	0.104231	69.5218
8535-102_3	Dermokine	-0.234312	-0.0795071	0.27529	0.00269599	0.0286773	7.74288
4911-49_2	Glutathione S-transferase Pi	0.310362	-0.0790013	0.178481	0.124284	0.289963	356.944
5598-3_3	GREM2	-0.0370193	-0.078978	0.125635	0.496797	0.657815	1426.8
7152-5_3	TIMD3	-0.0300805	-0.0788778	0.157451	0.229839	0.416466	660.099
3403-1_2	TPSB2	-0.0749557	-0.0785951	0.199148	0.0629381	0.185583	180.758
9947-22_3	TOPB1	-0.159929	-0.0785525	0.152012	0.265952	0.451427	763.815
9234-8_3	TWSG1	-0.138707	-0.0781562	0.275653	0.00264943	0.0286773	7.60916
10655-43_3	CLPB	-0.313905	-0.0780491	0.142041	0.34251	0.530004	983.688
9328-55_3	MICB	0.16783	-0.0780435	0.14322	0.33276	0.518832	955.688
5077-28_3	EPHB2	-0.101119	-0.0779277	0.166153	0.179935	0.357134	516.773
2658-27_1	TrkC	-0.101311	-0.0777693	0.225707	0.0235266	0.102532	67.5683
4707-50_2	2014-03-03	-0.122462	-0.0775027	0.178662	0.123585	0.289743	354.936
8340-9_3	DB110	-0.150777	-0.0774711	0.263053	0.00478881	0.041426	13.7534
8356-88_3	NEU1	0.402984	-0.0772878	0.107777	0.691687	0.806875	1986.53
9114-84_3	UROL1	-0.0540368	-0.0769205	0.177756	0.127114	0.292525	365.071
8080-24_3	PSMP	-0.122306	-0.0765647	0.158358	0.224197	0.409081	643.894
9237-54_3	Lysosomal acid phosphatase	-0.32491	-0.0763547	0.141497	0.347073	0.533045	996.794
8990-42_3	AT1B3	-0.069668	-0.0762628	0.194162	0.0746743	0.208218	214.464
6904-14_3	LRRT2	-0.0177741	-0.0759724	0.167785	0.171602	0.348297	492.84
2278-61_4	TIMP-2	-0.0623851	-0.0754012	0.226976	0.0223769	0.0991768	64.2666
3032-11_2	FSH	-0.0492561	-0.0751626	0.0891951	0.878517	0.927952	2523.1
4548-4_2	Fucosyltransferase 3	-0.468192	-0.0750922	0.232234	0.0181285	0.0870653	52.065
8300-82_3	PEX14	-0.108126	-0.0746761	0.119199	0.565241	0.709826	1623.37
2633-52_2	IL-13 Ra1	-0.0747082	-0.0746633	0.197154	0.0674284	0.193654	193.654
9046-46_3	LPPRC	-0.109691	-0.0745333	0.2093	0.0438398	0.148827	125.908
6920-1_3	GFRAL	0.128798	-0.0744954	0.126269	0.490247	0.655794	1407.99
6086-15_3	CRDL2	-0.0534735	-0.0743915	0.207125	0.0474438	0.155724	136.259
3050-7_2	vWF	-0.0427727	-0.0743127	0.164431	0.189073	0.366655	543.017
9304-27_3	FSTL1	-0.191414	-0.0742934	0.265954	0.004189	0.0375962	12.0308
8646-61_3	LRRT4	-0.117814	-0.0742718	0.236947	0.0149486	0.0773559	42.9325
10910-6_3	CEAM4	-0.0623599	-0.0742514	0.210297	0.0422691	0.145386	121.397
2775-54_2	IL-17F	-0.103041	-0.0741541	0.241842	0.0121854	0.0699928	34.9964
3836-51_2	UFM1	-0.12871	-0.0741235	0.143492	0.330537	0.516768	949.303
9385-4_3	GAA	0.0803799	-0.0741155	0.174402	0.140892	0.313432	404.641
7019-13_3	Semaphorin-7A	0.147727	-0.0740994	0.164793	0.187119	0.364838	537.407
5202-4_3	PPID	-0.0310095	-0.0738016	0.107052	0.699708	0.810961	2009.56
9925-56_3	SREC-II	-0.172261	-0.0737601	0.209482	0.0435505	0.148196	125.077
3736-60_3	BMP-6	0.146842	-0.0737344	0.127357	0.479114	0.647537	1376.02
3170-6_1	AMPM2	-0.109498	-0.0737016	0.152194	0.264685	0.450341	760.176
3320-49_2	IGFBP-7	-0.0894534	-0.073691	0.21483	0.0357313	0.131564	102.62
9369-174_3	NGL1	-0.109434	-0.073626	0.168872	0.166218	0.341471	477.377
2976-58_2	Desmoglein-1	-0.140894	-0.0733108	0.343727	6.70199e-05	0.00281012	0.192481
5717-2_3	CILP	-0.0600237	-0.0730375	0.160624	0.210551	0.393431	604.704
4925-54_2	MMP-13	0.013688	-0.0724218	0.13769	0.380127	0.561876	1091.72
5109-24_3	Nr-CAM	-0.0603326	-0.0721165	0.240573	0.0128536	0.0708553	36.9156
10902-53_3	APRV1	-0.116713	-0.0719818	0.199601	0.061954	0.184395	177.932
2685-21_2	IGFBP-5	-0.0552313	-0.0716226	0.198241	0.0649464	0.189945	186.526
9095-5_3	MTFR1	-0.446776	-0.0716094	0.224166	0.0249928	0.106025	71.7793
11510-51_3	Apo L1	-0.0153357	-0.0713504	0.146574	0.306048	0.491044	878.97
5689-1_3	DB112	-0.779685	-0.0713079	0.122825	0.526261	0.680513	1511.42
5110-84_3	NRX1B	0.160492	-0.071286	0.181109	0.114456	0.276697	328.716
10631-9_3	PGRC2	-0.200524	-0.0710638	0.196701	0.0684862	0.195519	196.692
6923-1_3	PLOD2	-0.0923446	-0.0706806	0.166697	0.177123	0.353507	508.696
8935-22_3	MRP6	-0.0699281	-0.0706749	0.236041	0.0155182	0.0791619	44.5681
5231-79_3	PCSK9	-0.0278708	-0.0703991	0.137328	0.383375	0.565513	1101.05
8528-74_3	ISLR2	-0.0248981	-0.0702436	0.146574	0.306048	0.491044	878.97
8845-2_3	ATS3	-0.143901	-0.0698424	0.22471	0.0244663	0.104409	70.2672
3449-58_2	Kallistatin	-0.137153	-0.0698134	0.300671	0.000753452	0.0130356	2.16392
8949-3_3	NGF R	-0.134343	-0.0698005	0.13198	0.433241	0.614453	1244.27
5621-64_3	THSD1	0.00296214	-0.0692927	0.221356	0.027876	0.113399	80.0598
9940-35_3	DUS28	-0.381632	-0.0691847	0.117567	0.583069	0.723671	1674.58
2728-62_2	Laminin	-0.0771347	-0.0691195	0.160624	0.210551	0.393431	604.704
8021-59_3	RM14	-0.541691	-0.0690167	0.177302	0.128909	0.294888	370.226
5488-74_3	SRCN1	-0.0739137	-0.0689926	0.131073	0.442042	0.620501	1269.55
3358-51_2	CDK5/p35	-0.0851847	-0.068632	0.26269	0.00486908	0.041994	13.984
10075-75_3	ACBD6	-0.154455	-0.068461	0.125453	0.498676	0.658481	1432.2
8288-27_3	b2-Glycoprotein I	-0.0884009	-0.0684213	0.214648	0.0359747	0.132291	103.319
8468-19_3	PSA	0.0409243	-0.0682578	0.104423	0.728556	0.830652	2092.41
7823-22_3	SIA7B	0.0287141	-0.0682075	0.140591	0.354767	0.538241	1018.89
9728-4_3	CIP1	-0.242991	-0.068066	0.12917	0.460838	0.634785	1323.53
10463-23_3	Alkaline phosphatase, intestine	0.0978517	-0.0678909	0.227973	0.021509	0.0969761	61.7738
4342-10_3	sICAM-1	0.00548347	-0.0678215	0.17141	0.154176	0.329128	442.793
2748-3_2	Activin A	-0.0312115	-0.0675756	0.1531	0.258416	0.442823	742.171
6294-11_3	BAGE2	-0.036139	-0.0674785	0.098169	0.794721	0.87584	2282.44
9846-32_3	Rho-GDI beta	-0.0203981	-0.0673358	0.122281	0.532044	0.68583	1528.03
9211-19_3	PEDF	-0.0645792	-0.0671991	0.193709	0.0758277	0.209603	217.777
2974-61_2	contactin-1	-0.0559534	-0.0671775	0.20368	0.0536748	0.168107	154.154
2938-55_2	Apo E4	-0.134731	-0.067165	0.202864	0.0552498	0.171358	158.678
9986-14_3	Neuropeptide W	-1.01384	-0.0670391	0.205131	0.0509701	0.163361	146.386
5765-53_3	DB121	0.607743	-0.0670213	0.163706	0.193027	0.37057	554.373
8463-2_3	SOD3	0.155772	-0.0667328	0.173405	0.145213	0.317875	417.052
5404-53_3	DR6	-0.0602954	-0.066593	0.179478	0.120478	0.286063	346.012
9259-35_3	DR6	-0.0678582	-0.0663649	0.172317	0.150048	0.324992	430.939
8064-125_3	Poliovirus receptor	-1.25003	-0.0663521	0.164793	0.187119	0.364838	537.407
5078-82_3	EphB6	-0.0427108	-0.0661572	0.144126	0.325389	0.511504	934.518
9061-3_3	ARHGA	-0.0562707	-0.0659906	0.180928	0.115112	0.277118	330.602
2826-53_2	EDA	-0.182065	-0.0654987	0.313452	0.000379992	0.0085932	1.09134
11105-171_3	Alpha enolase	-0.122034	-0.0654711	0.148749	0.289543	0.475181	831.566
8653-132_3	DNJC4	-0.0472324	-0.0652905	0.107505	0.694697	0.808416	1995.17
5121-3_2	SEM6B	0.019065	-0.0651174	0.140954	0.351676	0.536386	1010.01
4965-27_1	ATP synthase beta chain	0.0927399	-0.0651137	0.163252	0.19553	0.374126	561.563
7846-44_3	PSG11	0.209531	-0.0651032	0.214376	0.0363426	0.132794	104.376
7735-17_3	PEDF	-0.0659502	-0.065043	0.247915	0.00940122	0.0597056	27.0003
9283-8_3	CD44	-0.0835901	-0.0649996	0.154097	0.251647	0.437753	722.729
3216-2_2	PIGR	0.0526264	-0.0647356	0.151831	0.267224	0.452516	767.466
9970-7_3	UBXN4	-0.323657	-0.0647298	0.15165	0.2685	0.453606	771.131
5843-60_3	NG36	-0.0821775	-0.0645856	0.145667	0.313116	0.497659	899.269
4272-46_2	PHI	-0.0306493	-0.0645129	0.0965373	0.811131	0.885431	2329.57
2770-51_2	I-309	-0.0699652	-0.0644357	0.220631	0.0286661	0.115469	82.3292
6641-60_3	PolyUbiquitin K48	-0.105663	-0.0642995	0.125453	0.498676	0.658481	1432.2
3391-10_2	PK3CG	0.178701	-0.0641683	0.254804	0.00695048	0.0507933	19.9618
4563-61_2	PLCG1	-0.0987392	-0.0637182	0.267223	0.00394896	0.0365852	11.3414
3814-63_1	IL-11 RA	-0.0662633	-0.0632262	0.106418	0.706707	0.815125	2029.66
4693-72_2	3HIDH	-0.0594968	-0.0630439	0.144851	0.319573	0.505683	917.814
3894-15_2	NAGK	-0.078641	-0.0625938	0.126178	0.491181	0.655821	1410.67
3366-51_2	ECM1	-0.0120114	-0.0624344	0.132433	0.428877	0.608865	1231.73
10044-12_3	WN10A	-0.18278	-0.0624253	0.16008	0.213767	0.398145	613.939
2943-5_2	Cytochrome P450 3A4	-0.00834365	-0.0623091	0.147843	0.296341	0.480843	851.092
9828-86_3	LDHC	-0.0484065	-0.0622021	0.121737	0.537851	0.691453	1544.71
6382-17_3	MANBA	-0.0773173	-0.0620687	0.164431	0.189073	0.366655	543.017
4154-57_2	P-Selectin	0.0290632	-0.06172	0.116842	0.591039	0.731665	1697.46
5357-60_3	NLGNX	0.287549	-0.0616773	0.135424	0.400709	0.580644	1150.84
3813-3_2	FYN	-0.143725	-0.0616407	0.138597	0.372082	0.555127	1068.62
6440-31_3	MFAP5	-0.045275	-0.0614955	0.159355	0.218113	0.403101	626.419
9769-48_3	DNER	-0.134341	-0.0614361	0.123822	0.515724	0.673866	1481.16
10772-21_3	CGAT2	-0.0121767	-0.0614274	0.152556	0.262164	0.447377	752.936
5632-6_3	CRAC1	-0.0666926	-0.0612368	0.148568	0.290893	0.475496	835.446
9277-16_3	PAP1	-0.100887	-0.0610823	0.191715	0.0810837	0.218298	232.872
8947-268_3	HEG1	-0.430772	-0.0610563	0.147208	0.301167	0.487846	864.952
4318-12_3	PTP-1C	-0.0753683	-0.0606721	0.141226	0.34937	0.534286	1003.39
2429-27_4	C8	-0.116187	-0.0605965	0.193528	0.0762933	0.210485	219.114
2636-10_2	Lymphotoxin b R	-0.101508	-0.0605253	0.238216	0.0141828	0.0748771	40.7331
9063-9_3	Apo A-V	-0.532834	-0.0604958	0.212654	0.0387499	0.13842	111.29
2889-37_2	Cardiotrophin-1	-0.284116	-0.0604905	0.203861	0.0533301	0.167575	153.164
8260-13_3	PDZ1I	-0.0451835	-0.0601188	0.233956	0.0169025	0.0838413	48.5441
5532-53_3	bFGF-R	-0.050551	-0.0601155	0.167241	0.174345	0.351381	500.718
9536-16_3	EP3A	-0.01485	-0.0599666	0.186004	0.0978607	0.249827	281.056
4127-75_1	C6	-0.0704706	-0.0599601	0.171954	0.151689	0.326574	435.65
7624-19_3	ANK2	-0.327299	-0.0598941	0.119471	0.562285	0.707042	1614.88
4908-6_1	Endoglin	0.0488464	-0.059745	0.104242	0.730529	0.832571	2098.08
3806-55_1	EphA5	-0.266754	-0.0596357	0.124365	0.510014	0.668229	1464.76
3197-70_2	IDE	-0.0978106	-0.0593189	0.249547	0.00875876	0.0580951	25.1552
8225-86_3	EPHB2	-0.0043796	-0.0593063	0.120105	0.555407	0.70054	1595.13
6264-9_3	CYR61	-0.111762	-0.059247	0.173949	0.142843	0.315088	410.245
4588-1_2	PH	0.00308143	-0.0589805	0.148296	0.292928	0.477192	841.289
2753-2_2	C1q	-0.125926	-0.0588434	0.184917	0.101364	0.255815	291.117
4276-10_2	prostatic binding protein	-0.139487	-0.0588241	0.151106	0.27239	0.456686	782.303
6458-6_3	RPN1	-0.0342009	-0.058668	0.112944	0.634217	0.763334	1821.47
5242-37_3	MP2K4	-0.0730302	-0.0583151	0.107052	0.699708	0.810961	2009.56
5023-23_1	PUR8	0.0848265	-0.0582005	0.11802	0.578102	0.720933	1660.31
10562-42_3	NETO2	-0.400896	-0.058134	0.122099	0.533977	0.687704	1533.58
9233-71_3	TFPI -2	0.801207	-0.0579673	0.143764	0.328324	0.515272	942.948
7769-29_3	3BP2	-1.28876	-0.0578262	0.149565	0.28352	0.469861	814.268
2783-18_2	LD78-beta	-0.0894059	-0.0574108	0.232415	0.0179958	0.0868638	51.684
4931-59_1	TF	-0.336874	-0.0572909	0.227339	0.0220578	0.098217	63.3499
5018-68_1	Peroxiredoxin-6	-0.0438034	-0.0571849	0.13207	0.432366	0.613515	1241.75
5737-61_3	SEM4D	0.0439933	-0.0571773	0.107505	0.694697	0.808416	1995.17
9863-1_3	Tropomyosin 4	-0.430322	-0.0571324	0.0786802	0.950043	0.971004	2728.52
5475-10_3	PKC-B-II	-0.00686953	-0.0570175	0.113941	0.623131	0.755757	1789.63
2835-1_4	Ku70	-0.0699267	-0.05697	0.151378	0.270459	0.455043	776.759
10363-13_3	SMAD3	-0.0914449	-0.0568814	0.163071	0.196539	0.375555	564.46
7867-154_3	SIA7A	-0.138254	-0.0566284	0.176033	0.134045	0.302417	384.977
3446-7_2	IL-18 Ra	-0.00111486	-0.0565051	0.128898	0.463556	0.637307	1331.33
6364-7_3	TPSNR	-0.00828846	-0.0564286	0.161893	0.203193	0.384433	583.57
7898-29_3	MDM1	-0.182683	-0.0563722	0.197607	0.0663846	0.192777	190.657
10080-9_3	EI2BA	-0.125882	-0.0563006	0.123187	0.522419	0.677682	1500.39
5669-26_3	SIRB2	-0.0486886	-0.055923	0.0837563	0.919694	0.954249	2641.36
3887-90_2	IMB1	-0.132825	-0.0557033	0.0871102	0.895294	0.938134	2571.28
5611-56_3	D108B	-0.155186	-0.0555633	0.162708	0.198568	0.377674	570.288
3177-49_2	Carbonic Anhydrase IV	-0.0431939	-0.0555452	0.200326	0.0604069	0.182812	173.489
3044-3_2	PARC	-0.123136	-0.0549667	0.204405	0.0523073	0.165084	150.227
9267-2_3	CBPA4	-0.19978	-0.0549102	0.243202	0.0115043	0.0682112	33.0404
4763-31_3	Afamin	-0.0808843	-0.0546919	0.19525	0.0719665	0.203033	206.688
7969-163_3	WFD11	-0.212547	-0.0546799	0.166697	0.177123	0.353507	508.696
7231-37_3	TM11A	-0.158653	-0.0546699	0.165518	0.18326	0.360743	526.324
3453-87_2	LYN	-0.113967	-0.0543456	0.0863851	0.900848	0.942526	2587.23
5112-73_3	OX2G	0.0473894	-0.0542395	0.175671	0.135543	0.304124	389.279
2823-7_1	COMMD7	-0.08769	-0.0541862	0.165518	0.18326	0.360743	526.324
9444-70_3	DGCR6	-0.0214634	-0.0541643	0.164612	0.188094	0.365745	540.206
8474-6_3	ROR1	-0.1009	-0.0540945	0.202592	0.0557836	0.172455	160.211
9744-139_3	DNJA4	-0.123195	-0.0540924	0.326233	0.00018626	0.00529641	0.534938
8053-16_3	DJB14	0.0438446	-0.053986	0.177393	0.128548	0.294888	369.19
9380-2_3	sPLA(2)-XIII	-0.0110664	-0.0536746	0.124547	0.508116	0.666047	1459.31
3344-60_4	Antithrombin III	-0.0490378	-0.0532846	0.210297	0.0422691	0.145386	121.397
2987-37_3	Histone H1.2	-0.0517772	-0.0532329	0.0978064	0.798405	0.877543	2293.02
4187-49_2	6-Phosphogluconate dehydrogenase	-0.0751994	-0.0532149	0.102701	0.747191	0.844523	2145.93
7803-4_3	CHST1	0.0659497	-0.0527905	0.209663	0.0432629	0.147742	124.251
10502-15_3	PRPC	1.74184	-0.0527415	0.135424	0.400709	0.580644	1150.84
10439-57_3	Alpha-amylase 2B	-0.0357535	-0.0527392	0.102339	0.75108	0.845923	2157.1
2643-57_2	P-Cadherin	-0.0634176	-0.0527313	0.217277	0.0325833	0.124939	93.5792
7955-195_3	ITI heavy chain H1	-0.0689601	-0.0527159	0.127538	0.477271	0.645957	1370.72
8952-65_3	G-CSF	-0.0924268	-0.0526706	0.177393	0.128548	0.294888	369.19
2992-59_2	IL-17 sR	-0.179633	-0.0525334	0.138234	0.375287	0.558458	1077.82
2330-2_1	SDF-1	-0.074916	-0.0522496	0.136421	0.391571	0.573771	1124.59
3182-38_2	CD39	-0.0431995	-0.0522407	0.187908	0.0919727	0.238184	264.146
9895-77_3	XPF	0.918402	-0.0521703	0.0976251	0.800239	0.878214	2298.29
9043-7_3	TFP11	-0.00918001	-0.0520979	0.225344	0.0238645	0.103377	68.5389
2750-3_2	Apo A-I	-0.0814212	-0.0519047	0.16153	0.205275	0.385831	589.549
8034-6_3	DRGX	-0.0952616	-0.0518409	0.0972625	0.803891	0.879199	2308.78
10560-1_3	ITM2C	-0.143923	-0.0518045	0.215192	0.0352487	0.131564	101.234
5467-15_3	HSP 90b	-0.00460378	-0.0517136	0.129442	0.458127	0.633482	1315.74
8398-277_3	RAR-responsive protein TIG1	0.0603153	-0.051456	0.143854	0.327589	0.51468	940.835
5316-54_3	Prothrombin	-0.030457	-0.0512988	0.142585	0.337987	0.525838	970.698
8484-8_3	Leptin	-0.121781	-0.0512334	0.138778	0.370486	0.554763	1064.04
3053-49_2	Flt3 ligand	-0.0291005	-0.0510797	0.169235	0.164453	0.34105	472.309
5682-13_3	VASN	-0.0461841	-0.0507965	0.233049	0.0175382	0.0855174	50.3697
5947-90_3	Tpo	-0.485971	-0.0506847	0.170051	0.160537	0.337527	461.062
8890-9_3	T132B	-0.0234972	-0.050231	0.102883	0.745241	0.84398	2140.33
8898-19_3	PP14B	-0.205561	-0.0498379	0.166969	0.175729	0.352687	504.695
8467-9_3	Activin AB	-0.0449122	-0.0497888	0.12083	0.54758	0.697406	1572.65
5468-67_3	IL-17 RC	-0.27887	-0.0497345	0.189721	0.0866437	0.227252	248.841
5888-29_3	eIF-5A-1	-0.0928481	-0.0496813	0.0988035	0.788228	0.870688	2263.79
4697-59_2	GM-CSF	-0.43556	-0.0496068	0.140138	0.358656	0.54328	1030.06
4706-17_2	41	-0.122636	-0.0495795	0.0912799	0.860612	0.919865	2471.68
9856-22_3	DHYS	-1.40648	-0.0493676	0.151197	0.271745	0.456138	780.452
5731-1_3	ISK6	-0.167213	-0.0492687	0.146664	0.305347	0.491044	876.957
8348-4_3	EPHB2	-0.0808818	-0.0492308	0.224982	0.0242068	0.104231	69.5218
9326-33_3	ITI heavy chain H2	-0.0838163	-0.0492189	0.17422	0.14167	0.313947	406.875
4891-50_1	Glucagon	0.00167958	-0.049205	0.0692531	0.984973	0.992577	2828.84
3593-72_3	Caspase-3	-0.0291512	-0.0491272	0.106327	0.707705	0.815294	2032.53
4455-89_2	MFGM	-0.152283	-0.048924	0.210569	0.0418493	0.144983	120.191
5489-18_3	Stress-induced-phosphoprotein 1	-0.183532	-0.0486751	0.134155	0.412523	0.595359	1184.76
9910-9_3	MTAP	-0.0507547	-0.0485657	0.227792	0.0216645	0.0973717	62.2205
3289-19_2	Carbonic Anhydrase X	-0.188542	-0.0484217	0.248459	0.00918247	0.0589979	26.372
2834-54_1	kallikrein 8	-0.0814146	-0.0482117	0.168963	0.165775	0.34105	476.106
3647-49_4	TLR4:MD-2 complex	-0.0500496	-0.0482016	0.171139	0.155432	0.330422	446.4
9896-21_3	FOXGB	-0.243632	-0.0481415	0.129804	0.454527	0.630324	1305.4
9118-7_3	PSD2	-0.0706963	-0.0481122	0.113579	0.62716	0.758082	1801.2
7767-1_3	CF126	0.0166908	-0.0480748	0.0914612	0.859004	0.918489	2467.06
10514-5_3	PGD2 synthase	-0.0095044	-0.0479956	0.167059	0.175267	0.352251	503.367
5740-17_3	ROBO1	-0.0981524	-0.047915	0.154097	0.251647	0.437753	722.729
5392-73_2	Fas, soluble	-0.0500257	-0.0478411	0.127719	0.475431	0.644378	1365.44
10521-10_3	MXRA8	-0.109026	-0.047759	0.222534	0.0266329	0.110216	76.4898
3387-1_2	PAK3	-0.0176021	-0.0476867	0.136059	0.394879	0.575682	1134.09
8956-96_3	SREC-II	-0.0624599	-0.0476839	0.163524	0.194025	0.37199	557.24
5015-15_1	PAFAH	-0.0215337	-0.0476077	0.0809463	0.937505	0.963332	2692.51
7736-28_3	OPALI	-0.0397941	-0.047401	0.189811	0.0863842	0.226986	248.095
5107-7_2	Notch 1	-0.0422615	-0.0473813	0.146392	0.307453	0.491377	883.004
3437-80_3	Flt-3	-0.00431377	-0.0470174	0.175671	0.135543	0.304124	389.279
3503-4_2	Integrin a1b1	-0.144025	-0.0469764	0.230149	0.0197184	0.0914885	56.6314
5088-175_3	IL-23 R	0.145154	-0.0466369	0.168691	0.167106	0.34256	479.927
9883-29_3	Glyoxalase I	-0.0702962	-0.0464849	0.145758	0.312404	0.496802	897.225
10702-1_3	COSA1	-0.0845343	-0.0464796	0.217277	0.0325833	0.124939	93.5792
3606-2_5	Discoidin domain receptor 2	-0.0900289	-0.0463804	0.163252	0.19553	0.374126	561.563
2609-59_2	Cystatin C	-0.0170475	-0.0463391	0.212745	0.0386198	0.138127	110.916
10023-32_3	VDR	-0.0695368	-0.0462051	0.165881	0.181354	0.358959	520.849
9338-2_3	DCBD2	-0.0314719	-0.0460981	0.114757	0.614077	0.747617	1763.63
3443-61_2	HIPK3	-0.406741	-0.0460049	0.200054	0.0609831	0.183013	175.144
9332-6_3	DB136	0.277009	-0.0459275	0.125997	0.493049	0.656543	1416.04
8660-33_3	OLFL3	0.000780502	-0.045793	0.117748	0.581081	0.721828	1668.87
9603-9_3	IL22RA1	-0.250476	-0.0455546	0.120649	0.549533	0.698964	1578.26
5460-60_3	DEAD-box protein 19B	0.177468	-0.0454376	0.168147	0.169792	0.346091	487.642
6491-59_3	kallikrein 15	-0.00546454	-0.0452811	0.145214	0.316692	0.501954	909.54
2859-69_2	HDAC8	-0.042805	-0.045182	0.136603	0.389923	0.572233	1119.86
8222-49_3	CDHR3	0.547512	-0.0451449	0.167059	0.175267	0.352251	503.367
5903-91_2	HSP70 protein 8	-0.00261185	-0.0451375	0.10814	0.687669	0.805131	1974.99
2960-66_2	Properdin	-0.0449194	-0.0449819	0.227611	0.0218211	0.097922	62.6701
9276-7_3	CBPA2	-0.0161514	-0.0449319	0.108231	0.686664	0.805131	1972.1
3617-80_4	HGFA	-0.0702548	-0.0448409	0.157088	0.232126	0.419779	666.666
3359-11_2	CDK8/cyclin C	-0.0849396	-0.0448019	0.235678	0.0157514	0.0800671	45.2379
10613-33_3	CASC4	0.00245993	-0.0447829	0.111584	0.649357	0.775126	1864.95
6975-52_3	SNAPN	0.0233462	-0.0447699	0.183738	0.105276	0.261551	302.353
2998-53_2	JAM-C	-0.142818	-0.0447668	0.149656	0.282856	0.469302	812.362
4430-44_3	Collectin Kidney 1	0.0502485	-0.0446182	0.156726	0.23443	0.421065	673.282
7854-38_3	NR3L1	-0.0462138	-0.0445289	0.167966	0.170695	0.347438	490.236
7696-104_3	NBR1	-0.0758685	-0.0443504	0.179115	0.121851	0.287319	349.955
6408-2_3	INHBC	-0.0331155	-0.0443107	0.108774	0.680628	0.801133	1954.76
2693-20_3	OSM	-0.0692648	-0.0442875	0.232777	0.017733	0.0861747	50.9293
9357-4_3	CREG1	-0.0509077	-0.0442061	0.149565	0.28352	0.469861	814.268
3488-64_2	Catalase	-0.102585	-0.043976	0.145395	0.315258	0.500233	905.422
9738-7_3	FAF2	-0.151321	-0.0439146	0.123822	0.515724	0.673866	1481.16
8908-14_3	KCE1L	-0.10921	-0.0437609	0.169779	0.161834	0.339181	464.787
6925-26_3	SNX8	-0.27948	-0.0436577	0.0812183	0.93589	0.962706	2687.88
5114-65_3	Prolactin Receptor	-0.172516	-0.043643	0.140682	0.353993	0.537635	1016.67
8016-19_3	DNJC4	-0.0769738	-0.0436428	0.204587	0.0519702	0.164926	149.258
9335-28_3	PSG9	0.490419	-0.0431332	0.146574	0.306048	0.491044	878.97
6448-36_3	Sema E	0.0499384	-0.0430118	0.11521	0.609055	0.743078	1749.21
10527-22_3	DHX9	0.202261	-0.0428374	0.149384	0.28485	0.470979	818.09
3317-33_1	HTRA2	-0.0122404	-0.0426671	0.132433	0.428877	0.608865	1231.73
5837-49_3	LIF sR	0.0173773	-0.0422845	0.126269	0.490247	0.655794	1407.99
10894-25_3	Secretagogin	-1.20856	-0.0422652	0.18256	0.109313	0.269251	313.946
10571-14_3	MGAT1	-0.297027	-0.0421	0.121284	0.542708	0.694588	1558.66
7910-41_3	LRFN1	0.085001	-0.0419761	0.278372	0.00232322	0.0267963	6.67229
8889-5_3	CCPG1	-0.0476353	-0.0419652	0.178299	0.124987	0.290422	358.962
4423-77_2	BCL2-like 1 protein	-0.0674966	-0.0419192	0.165337	0.184219	0.361145	529.078
3421-54_2	CD30 Ligand	-0.0471736	-0.0418743	0.165156	0.185182	0.362044	531.843
5009-11_1	Moesin	-0.0322184	-0.0417382	0.106871	0.701709	0.812953	2015.31
10506-53_3	PGRC2	-1.76455	-0.0416925	0.131708	0.435871	0.617269	1251.82
9829-91_3	SULT 2A1	0.0247499	-0.0416477	0.0752357	0.965949	0.979592	2774.2
4282-3_2	RAN	-0.125677	-0.0415475	0.117748	0.581081	0.721828	1668.87
2668-70_2	Calpain I	-0.030715	-0.0414744	0.100435	0.771272	0.858563	2215.09
5356-2_3	MIF	-0.00672147	-0.0410641	0.151468	0.26978	0.454699	774.808
5542-22_2	NRP1	-0.0442134	-0.0409931	0.121374	0.541735	0.693653	1555.86
3441-64_2	GSK-3 alpha/beta	-0.121508	-0.040949	0.178118	0.125692	0.29159	360.989
2647-66_2	Rab GDP dissociation inhibitor beta	-0.132501	-0.0409018	0.182197	0.11058	0.27121	317.586
5659-11_3	TRH	0.0355602	-0.0408913	0.139231	0.366515	0.552562	1052.63
3284-75_1	BGN	-0.0312286	-0.0407549	0.12364	0.517633	0.675439	1486.64
3521-16_2	TSH	-0.113056	-0.0407169	0.164249	0.190055	0.367816	545.838
8918-64_3	FAK2	-0.0231361	-0.04063	0.101976	0.754957	0.847961	2168.24
9082-25_3	SE1L2	0.0204334	-0.0405948	0.169869	0.161401	0.338847	463.543
7099-33_3	FSTL5	-0.265938	-0.0405685	0.207578	0.0466725	0.154606	134.043
10658-28_3	SC11C	0.204124	-0.0405659	0.166697	0.177123	0.353507	508.696
2977-7_2	EDAR	-0.10235	-0.0405394	0.133158	0.421946	0.6026	1211.83
7660-21_3	Tropomyosin 4	-0.128295	-0.0405022	0.0809463	0.937505	0.963332	2692.51
8360-169_3	NKp46	-0.185677	-0.0403897	0.0844815	0.914701	0.95113	2627.02
6990-44_3	SDF2L	-0.0504573	-0.0401637	0.131617	0.43675	0.617296	1254.34
8859-51_3	CAH11	-0.0365866	-0.0400477	0.0946338	0.829693	0.89886	2382.88
6651-74_3	PolyUbiquitin K48	-0.072136	-0.0393907	0.172679	0.148423	0.323176	426.269
9793-145_3	IGDC4	-0.0405182	-0.0392366	0.181381	0.113476	0.275257	325.904
4301-58_2	Thymidine kinase	-0.047449	-0.039094	0.233231	0.0174094	0.0853238	49.9998
9183-7_3	IFN-a/b R1	-0.797879	-0.0390507	0.124003	0.513817	0.672906	1475.68
8975-26_3	RCD1	-0.10657	-0.0390273	0.0910986	0.862211	0.920371	2476.27
9008-6_3	TMG1	-0.363202	-0.0389213	0.125906	0.493985	0.656543	1418.73
3440-7_2	granzyme A	-0.0378881	-0.0389038	0.106055	0.710697	0.816122	2041.12
6451-64_3	ASPN	-0.0841865	-0.0388957	0.161077	0.2079	0.389745	597.09
10610-8_3	DB134	-0.0482595	-0.038757	0.170776	0.157119	0.332042	451.246
2949-6_2	GX	-0.0969717	-0.0387328	0.139503	0.364146	0.550146	1045.83
8659-68_3	G6B	-0.0179304	-0.0386664	0.115935	0.601035	0.738311	1726.17
7923-41_3	SEM4C	-0.293552	-0.0385948	0.125635	0.496797	0.657815	1426.8
4240-31_2	M2-PK	-0.0976925	-0.0384978	0.110225	0.664499	0.787961	1908.44
6612-90_3	CP079	-0.087849	-0.0384837	0.199511	0.0621498	0.184395	178.494
8759-29_3	a1,4-Galactosyltransferase	0.051686	-0.0384657	0.135877	0.39654	0.576931	1138.86
6022-57_3	NELL2	-0.0574051	-0.0381333	0.159717	0.215931	0.400617	620.155
4556-10_2	IL-34	-0.137547	-0.038068	0.158629	0.222525	0.408627	639.092
7085-81_3	CDSN	0.0593025	-0.0379482	0.127901	0.473594	0.642799	1360.16
7888-58_3	CCD56	0.0016159	-0.0379167	0.112944	0.634217	0.763334	1821.47
7935-26_3	LARGE	-0.0216471	-0.037855	0.0841189	0.917218	0.952712	2634.25
10471-25_3	LRRN3	-0.226698	-0.0377483	0.0781363	0.952806	0.97279	2736.46
5196-7_3	NMT1	-0.0732018	-0.0374037	0.106508	0.705708	0.814955	2026.79
5590-11_3	ZPLD1	0.282487	-0.0370838	0.085116	0.910202	0.948169	2614.1
7841-84_3	ESAM	-0.0550992	-0.0370435	0.164068	0.191042	0.368979	548.672
6420-4_3	SDHF2	-0.0519662	-0.0369664	0.168691	0.167106	0.34256	479.927
7206-20_3	F16P1	0.148499	-0.0368334	0.174402	0.140892	0.313432	404.641
10666-7_3	GNPTG	-0.0354639	-0.0367516	0.204587	0.0519702	0.164926	149.258
4542-24_2	Clusterin	-0.0507997	-0.0367022	0.131526	0.437629	0.617353	1256.87
2774-10_3	IL-16	-0.0144581	-0.0365377	0.124909	0.504331	0.662597	1448.44
5643-2_3	LCN8	-0.0415386	-0.0364709	0.166969	0.175729	0.352687	504.695
6334-9_3	GGT2	-0.083112	-0.0363339	0.238307	0.0141295	0.0747329	40.58
2524-56_3	HMG-1	-0.0451891	-0.0362706	0.128807	0.464464	0.637639	1333.94
7800-85_3	N2DL4	-0.00572996	-0.036119	0.111403	0.651376	0.775839	1870.75
9872-23_3	CTNA2	-0.442838	-0.0360669	0.184282	0.103455	0.259044	297.124
9116-28_3	HECA2	-0.0879519	-0.0358345	0.0918238	0.855767	0.91605	2457.76
7241-12_3	CD3-zeta	-0.0778111	-0.0358168	0.101613	0.758819	0.851633	2179.33
4469-78_2	ST4S6	-0.0424834	-0.0356692	0.129985	0.452732	0.628442	1300.25
7826-1_3	DCLK3	-0.185641	-0.0356288	0.158629	0.222525	0.408627	639.092
5134-52_2	TIMD3	-0.0554308	-0.0354429	0.155819	0.240264	0.4249	690.038
6441-62_3	ATS6	-0.00528331	-0.0353161	0.0831218	0.923931	0.956079	2653.53
8892-14_3	PEAR1	-0.404911	-0.0353063	0.11802	0.578102	0.720933	1660.31
6395-58_3	GPHA2	0.139107	-0.0351056	0.168147	0.169792	0.346091	487.642
5337-64_3	B7-2	-0.318662	-0.0350677	0.100254	0.773173	0.860013	2220.55
5315-22_3	Troponin T	-0.0330606	-0.0350361	0.112672	0.637244	0.76448	1830.16
8985-13_3	SRAC1	-0.456781	-0.0350218	0.165518	0.18326	0.360743	526.324
7933-75_3	ADA22	-0.807727	-0.0350084	0.117386	0.585059	0.724888	1680.29
9059-14_3	RPGF5	-0.0364583	-0.0348999	0.128988	0.462649	0.636364	1328.73
5482-61_3	RBP	0.0704061	-0.0348167	0.127357	0.479114	0.647537	1376.02
9874-28_3	p15-INK4b	-0.0880155	-0.0347731	0.222716	0.0264461	0.109918	75.9532
9837-60_3	NAD(P)H dehydrogenase	-0.0997502	-0.034772	0.107415	0.6957	0.8086	1998.05
3331-8_1	RGMB	-0.0341204	-0.0345938	0.237763	0.0144522	0.0757422	41.5067
4158-54_2	uPA	-0.0245224	-0.0343534	0.112672	0.637244	0.76448	1830.16
9840-2_3	Cdc42Hs	0.0207264	-0.0342809	0.106055	0.710697	0.816122	2041.12
2993-1_2	IL-18 Rb	-0.0947527	-0.034098	0.174855	0.138962	0.310583	399.099
3360-50_4	Chk2	-0.0898202	-0.0339654	0.133702	0.416791	0.598511	1197.02
4851-25_1	IL-1a	-0.364677	-0.0338741	0.117567	0.583069	0.723671	1674.58
7934-11_3	NDRG4	-0.0771587	-0.0338703	0.179025	0.122196	0.287661	350.947
8374-5_3	NGF R	0.0208648	-0.0333759	0.133339	0.420224	0.600738	1206.88
9930-48_3	GABR2	-0.214361	-0.0333744	0.133067	0.422809	0.603233	1214.31
2855-49_2	ERK-1	-0.0382045	-0.0333575	0.127719	0.475431	0.644378	1365.44
5254-69_3	PDE3A	-0.0613272	-0.0333402	0.0814902	0.934251	0.96171	2683.17
8916-32_3	STIM1	-0.118356	-0.0332919	0.123096	0.523378	0.67862	1503.14
5339-49_3	calgranulin B	-0.0212655	-0.0332185	0.140772	0.353219	0.537313	1014.45
9039-47_3	TOIP1	-0.0664392	-0.0330848	0.171229	0.155012	0.329774	445.195
7943-16_3	CUZD1	-0.0129795	-0.0329844	0.153372	0.256557	0.440952	736.831
3340-53_1	TSP4	-0.113179	-0.0328431	0.143401	0.331277	0.517643	951.428
9023-9_3	CD34	-0.193239	-0.0327252	0.121374	0.541735	0.693653	1555.86
5699-19_3	CI061	0.00956282	-0.0326505	0.156182	0.237917	0.422572	683.299
2201-17_6	Endostatin	-0.0181484	-0.0324164	0.106508	0.705708	0.814955	2026.79
3192-3_2	Glutamate carboxypeptidase	8.96358e-05	-0.0323175	0.173767	0.143629	0.316337	412.504
9557-5_3	MANS1	-0.00857708	-0.032201	0.0898296	0.873183	0.925039	2507.78
10885-36_3	CF089	-0.179534	-0.0320493	0.111766	0.647337	0.774002	1859.15
9845-33_3	PARK7	-0.222978	-0.0319434	0.0790428	0.948147	0.969758	2723.08
7178-59_3	DEPP	0.104122	-0.031871	0.0905547	0.866962	0.923216	2489.91
2848-2_2	WIF-1	-0.229356	-0.0318163	0.230239	0.0196468	0.0913036	56.4256
8231-122_3	VEGF sR1	0.675354	-0.0318109	0.133974	0.414227	0.595723	1189.66
5090-49_2	ILT-2	-0.104447	-0.0317528	0.161621	0.204753	0.385102	588.05
3630-27_4	Nectin-like protein 1	0.107194	-0.0317335	0.115573	0.605042	0.741016	1737.68
6544-33_3	NELL1	-0.00170391	-0.0316697	0.113851	0.624138	0.756339	1792.52
3719-2_2	p27Kip1	-0.678208	-0.0316037	0.0837563	0.919694	0.954249	2641.36
10533-1_3	PCDA4	-0.0134589	-0.0314746	0.105783	0.713685	0.818245	2049.7
6439-59_3	CN093	-0.00898578	-0.0314296	0.0821247	0.930337	0.959056	2671.93
9350-3_3	FSTL4	-0.280529	-0.031365	0.200236	0.0605984	0.183006	174.039
7805-52_3	GOS-28	-1.143	-0.0313462	0.131073	0.442042	0.620501	1269.55
8013-9_3	LMA2L	0.279676	-0.0312662	0.169144	0.164893	0.34105	473.572
10424-31_3	NPDC1	-0.0944737	-0.0312612	0.112763	0.636235	0.763907	1827.27
8287-17_3	CLM2	-1.81884	-0.0311526	0.185189	0.100479	0.254924	288.574
9379-248_3	CX069	-0.0478932	-0.0310644	0.133339	0.420224	0.600738	1206.88
3091-70_2	Aurora kinase A	-0.0804147	-0.0309792	0.109681	0.670552	0.792521	1925.83
8894-80_3	hnRNP A/B	-0.0251154	-0.0309517	0.102157	0.75302	0.846448	2162.67
4880-21_1	GDF2	-0.18354	-0.0307783	0.123187	0.522419	0.677682	1500.39
9317-4_3	LRC25	0.309964	-0.0307594	0.177212	0.12927	0.294888	371.264
3401-8_2	TCPTP	-0.0232001	-0.0306841	0.150471	0.276934	0.46161	795.353
6555-58_3	Stomatin-like protein 2	0.0963234	-0.0306419	0.127175	0.480961	0.649117	1381.32
2611-72_2	Dtk	-0.0483001	-0.0306061	0.156907	0.233276	0.419779	669.968
4889-82_1	WNT7A	-0.0632897	-0.0305661	0.1657	0.182305	0.359849	523.581
8909-77_3	GNPI1	-0.207241	-0.0304938	0.215373	0.0350096	0.131564	100.548
8829-4_3	RAP	0.155234	-0.0300581	0.112944	0.634217	0.763334	1821.47
7124-18_3	IL-21	0.0928998	-0.0299751	0.0986222	0.790089	0.872074	2269.14
2603-61_2	B7	-0.0584799	-0.0299484	0.13624	0.393223	0.575018	1129.34
2991-9_2	IL-1 sRI	0.0194795	-0.0299415	0.179659	0.119796	0.285285	344.054
6259-60_3	Epididymal secretory protein E1	-0.0420612	-0.0299225	0.153735	0.254093	0.439351	729.755
6927-7_3	NDST1	-0.0530855	-0.0298824	0.136331	0.392396	0.574102	1126.96
3423-59_2	Chymase	-0.0619252	-0.0298478	0.144217	0.324658	0.511475	932.419
2642-4_1	PAFAH beta subunit	-0.0822165	-0.0297159	0.154278	0.25043	0.437225	719.235
8263-64_3	CR056	0.0203776	-0.0296288	0.0734228	0.972823	0.984452	2793.95
9218-7_3	Fas, soluble	-0.599886	-0.0296211	0.0830312	0.924527	0.956079	2655.24
5707-55_3	ELK3	-0.0326418	-0.0295344	0.0859318	0.904242	0.945389	2596.98
8864-59_3	CENPW	-0.314037	-0.0292112	0.139413	0.364934	0.551047	1048.09
3844-2_1	Cyclophilin A	-0.0110821	-0.0291171	0.0930022	0.845039	0.911018	2426.95
9584-105_3	RMTL1	-0.0589745	-0.0290746	0.156273	0.237333	0.422572	681.622
2620-4_2	gp130, soluble	-0.0474412	-0.0289947	0.138869	0.36969	0.554728	1061.75
3285-23_2	C1r	-0.0666264	-0.0289935	0.112944	0.634217	0.763334	1821.47
4162-54_2	Transferrin	-0.0430313	-0.0288399	0.148658	0.290217	0.475202	833.504
10943-36_3	WBP1	-0.240249	-0.0287926	0.241026	0.0126113	0.0701929	36.2196
10900-272_3	STMN2	-0.295942	-0.0286309	0.0745105	0.96882	0.981464	2782.45
5704-74_3	Granzyme M	-0.11927	-0.0282116	0.115301	0.608051	0.742484	1746.32
9851-9_3	FABPA	-0.100105	-0.0281962	0.146846	0.303949	0.490693	872.943
3381-24_2	LYNB	-0.0611186	-0.0281084	0.108049	0.688674	0.805323	1977.87
4866-59_2	TrkB	-0.384011	-0.027816	0.166878	0.176193	0.353123	506.026
5363-51_3	Semaphorin 3E	0.0879768	-0.0278078	0.135696	0.398204	0.578181	1143.64
8314-71_3	GNS	0.00877149	-0.0277024	0.0920957	0.853319	0.914794	2450.73
4540-11_2	CBX5	-0.0453964	-0.0276894	0.112854	0.635226	0.763334	1824.37
2515-14_3	GFRa-2	-0.0309852	-0.0276725	0.125544	0.497736	0.658481	1429.5
5006-71_1	MK13	-0.0808672	-0.0275572	0.111675	0.648347	0.774887	1862.05
4203-50_2	Cofilin-1	-0.10292	-0.0275294	0.179387	0.12082	0.286063	346.994
3206-4_2	LYVE1	0.0113464	-0.0275252	0.0870196	0.895996	0.938134	2573.3
5412-53_3	CD27	0.00927052	-0.027517	0.121102	0.544655	0.695531	1564.25
8791-151_3	Carbonic Anhydrase VA	-0.696817	-0.0274532	0.12355	0.518589	0.675765	1489.39
5758-49_3	kallikrein 9	-0.042887	-0.0274506	0.126813	0.484666	0.651972	1391.96
10426-21_3	GOSR2	0.092425	-0.027431	0.171954	0.151689	0.326574	435.65
6369-82_3	DEAF1	0.149323	-0.0273639	0.1531	0.258416	0.442823	742.171
7215-18_3	NADH-cytochrome b5 reductase	0.0579966	-0.0272423	0.176487	0.132192	0.299886	379.655
10600-24_3	CLGN	-0.0118912	-0.0271417	0.105693	0.71468	0.818406	2052.56
3054-3_2	Haptoglobin, Mixed Type	0.227478	-0.026754	0.150743	0.27498	0.459152	789.741
5601-2_3	PGRP-L	-0.0316894	-0.0264596	0.0886512	0.883006	0.931323	2535.99
8913-22_3	SIG11	-0.101828	-0.0263297	0.156273	0.237333	0.422572	681.622
8038-41_3	NSDHL	0.310497	-0.0261546	0.0895577	0.875482	0.926108	2514.38
4785-30_3	CBG	0.0991214	-0.0260953	0.0821247	0.930337	0.959056	2671.93
6994-19_3	CC018	1.22546	-0.0260912	0.145033	0.31813	0.503677	913.671
2708-54_2	TNFSF18	0.057365	-0.0260102	0.15029	0.278242	0.463521	799.111
3591-51_3	Cadherin-6	0.0521651	-0.0259224	0.117839	0.580088	0.72153	1666.01
9886-28_3	XRCC4	-0.0508606	-0.0258209	0.106327	0.707705	0.815294	2032.53
8887-21_3	NUDC	-0.214823	-0.025761	0.143673	0.329061	0.515301	945.063
7945-10_3	Semaphorin-6A	0.155755	-0.0256836	0.120105	0.555407	0.70054	1595.13
3210-1_2	METAP1	-0.105382	-0.0253588	0.141769	0.344786	0.532094	990.226
5272-55_2	SHC1	-0.050074	-0.025229	0.0949964	0.826209	0.8961	2372.87
6507-16_3	NCAM2	-0.0764119	-0.0251962	0.153825	0.25348	0.439344	727.994
9855-10_3	Rho A	-0.0278999	-0.0251092	0.111313	0.652386	0.775839	1873.65
3418-12_2	CAMK1D	-0.019317	-0.0250458	0.120196	0.554427	0.70054	1592.31
2878-66_2	YES	-0.0141674	-0.025009	0.108593	0.682641	0.802844	1960.55
3396-54_2	Renin	-0.0493119	-0.0250081	0.0959935	0.816502	0.889266	2344.99
9730-22_3	GHDC	-0.0289947	-0.0248817	0.171773	0.152514	0.327524	438.021
10938-13_3	sLFA-3	-0.104038	-0.0248159	0.135696	0.398204	0.578181	1143.64
6617-12_3	FCRL6	-0.0866593	-0.0247936	0.191987	0.0803494	0.217907	230.763
7808-5_3	GLCE	-0.0102226	-0.0247503	0.0906454	0.866175	0.92272	2487.65
3296-92_2	CNTN2	-0.0447231	-0.0245888	0.174764	0.139346	0.311199	400.203
7782-34_3	EP3B	-0.0798857	-0.0245685	0.10107	0.764587	0.855503	2195.89
2837-3_2	Met	-0.00260471	-0.0244809	0.0597353	0.997711	0.999103	2865.43
3347-9_2	BARK1	-0.0910269	-0.0244343	0.123368	0.520502	0.677337	1494.88
3291-30_2	CD23	-0.0184461	-0.0243548	0.150925	0.273682	0.458051	786.016
7915-31_3	APLP2	-0.0773887	-0.0241996	0.131708	0.435871	0.617269	1251.82
10419-1_3	SCAR5	-0.0477614	-0.0241616	0.125906	0.493985	0.656543	1418.73
4859-6_1	BMPR1A	0.0193371	-0.0241096	0.102248	0.752051	0.846352	2159.89
3438-10_2	FSTL3	0.0486452	-0.0239681	0.146755	0.304648	0.491044	874.948
8078-15_3	CF226	-0.0715139	-0.0239503	0.138869	0.36969	0.554728	1061.75
9831-12_3	G3BP2	-0.0752353	-0.0237745	0.0962654	0.813823	0.887021	2337.3
7743-5_3	TIM50	-0.110297	-0.0237544	0.139141	0.367307	0.552596	1054.91
2813-11_2	ART	-0.198409	-0.0234368	0.106599	0.704709	0.814955	2023.92
9070-1_3	CQ067	-0.606005	-0.023434	0.095359	0.822701	0.893983	2362.8
5111-15_3	NRX3B	-0.00838009	-0.023422	0.116298	0.597032	0.735282	1714.68
7745-3_3	ZCD1	-0.106803	-0.0234092	0.105693	0.71468	0.818406	2052.56
9934-29_3	PIPNA	-0.0441696	-0.0233982	0.107777	0.691687	0.806875	1986.53
5116-62_2	ROBO2	-0.062306	-0.0233563	0.178753	0.123236	0.289399	353.935
5249-31_3	DRAK2	-0.0279254	-0.0233038	0.0829405	0.925119	0.956079	2656.94
6019-12_3	C1T9A	0.0521792	-0.0232667	0.0844815	0.914701	0.95113	2627.02
7947-19_3	AP4AT	-0.0673942	-0.023093	0.0923677	0.850854	0.914199	2443.65
3903-49_2	Sorting nexin 4	0.0103244	-0.0230398	0.122643	0.528185	0.681468	1516.95
4967-1_1	C1QBP	-0.0550754	-0.02291	0.18401	0.104362	0.260634	299.729
4137-57_2	IL-17E	-0.116758	-0.0227019	0.126722	0.485594	0.652915	1394.63
8326-63_3	SIGIRR	0.862649	-0.022684	0.11793	0.579095	0.72153	1663.16
3214-3_2	NRP1	-0.0597116	-0.0226237	0.138144	0.376091	0.558826	1080.13
9256-78_3	NPTX1	-0.0542166	-0.0226079	0.0827592	0.926297	0.956951	2660.32
3505-6_2	Lymphotoxin a1/b2	-0.0249492	-0.0225622	0.128354	0.469018	0.641438	1347.02
3199-54_2	kallikrein 12	0.00625694	-0.0225006	0.153916	0.252868	0.438548	726.235
4179-57_3	2014-03-03	-0.0881551	-0.022228	0.125816	0.494922	0.656543	1421.41
11094-104_3	LPPL	-0.170815	-0.0220146	0.108684	0.681635	0.801989	1957.66
8400-74_3	Gastrin-releasing peptide	0.202468	-0.0219941	0.153372	0.256557	0.440952	736.831
5229-90_3	IMDH1	-0.121975	-0.0219382	0.0852067	0.90955	0.947833	2612.23
3773-15_4	sTie-2	0.0180327	-0.0215066	0.144126	0.325389	0.511504	934.518
2994-71_2	IL-1Rrp2	-0.01552	-0.0214373	0.161802	0.203712	0.384655	585.06
9468-8_3	Lectin, mannose-binding 2	0.0265742	-0.0213991	0.163706	0.193027	0.37057	554.373
9799-3_3	NRX3B	-0.586437	-0.0213599	0.141951	0.343268	0.53032	985.864
10467-58_3	CTXN3	-0.56391	-0.0213429	0.18673	0.0955816	0.245977	274.51
4258-15_2	PA2G4	-0.170977	-0.021336	0.126178	0.491181	0.655821	1410.67
9343-16_3	IL-2 sRb	0.017537	-0.0212773	0.120105	0.555407	0.70054	1595.13
5744-12_3	CA056	0.310928	-0.021248	0.0901922	0.870089	0.923806	2498.89
9913-4_3	RRBP1	-0.129804	-0.0212331	0.080765	0.938568	0.96408	2695.57
9905-8_3	CEP57	-0.165066	-0.0211633	0.133521	0.418505	0.599774	1201.95
7905-30_3	HPT	0.106534	-0.0210831	0.143764	0.328324	0.515272	942.948
5301-7_3	Eotaxin	0.105772	-0.0210527	0.154369	0.249823	0.437225	717.492
9010-3_3	DMPK	1.13686	-0.0208109	0.120921	0.546604	0.696781	1569.85
10504-6_3	F159B	-0.0265947	-0.020661	0.0678028	0.988107	0.994339	2837.84
9894-13_3	MYO6	-0.13401	-0.0206596	0.0988941	0.787295	0.870663	2261.11
2614-28_2	Ephrin-A4	-0.0294867	-0.020312	0.11231	0.64128	0.768359	1841.76
9984-12_3	YIPF6	-0.236859	-0.0202216	0.139141	0.367307	0.552596	1054.91
5630-48_3	CM35H	-0.0642742	-0.0201183	0.20504	0.0511356	0.163361	146.861
4973-18_1	cIAP-2	-0.00227501	-0.0200002	0.149293	0.285517	0.471267	820.005
3839-60_2	AIP	-0.0882004	-0.0198809	0.108956	0.678615	0.800403	1948.98
5122-92_2	Semaphorin-6A	-0.0207146	-0.0198226	0.168963	0.165775	0.34105	476.106
8059-1_3	Tpo	-0.423782	-0.0197585	0.131164	0.441158	0.620169	1267.01
8906-60_3	LRTM2	0.0667661	-0.0197393	0.123278	0.52146	0.677662	1497.63
5024-67_1	Rb	-0.000544873	-0.0196231	0.119017	0.567215	0.711682	1629.04
7200-4_3	LRFN2	0.109292	-0.0196144	0.184373	0.103154	0.258516	296.259
2754-50_2	C3	-0.0290852	-0.0195442	0.0909173	0.863802	0.920876	2480.84
9503-1_3	NMS	-0.061294	-0.0195026	0.12926	0.459933	0.634452	1320.93
3346-72_2	AURKB	-0.0690162	-0.0192354	0.114938	0.612067	0.745486	1757.86
10695-12_3	WF10B	-0.231127	-0.0191799	0.182379	0.109945	0.270344	315.762
9189-76_3	ghrelin	-0.0385485	-0.0191618	0.112944	0.634217	0.763334	1821.47
6955-68_3	SNX1	0.0890444	-0.0190512	0.149202	0.286185	0.471828	821.924
3322-52_2	LRIG3	0.0629519	-0.0189134	0.123006	0.524338	0.679251	1505.9
8036-75_3	FSHB	-0.260988	-0.0188775	0.106055	0.710697	0.816122	2041.12
7776-20_3	UNC5B	-0.0274339	-0.0187758	0.19244	0.0791379	0.216667	227.284
7924-7_3	CD3G	-0.758848	-0.0187706	0.091008	0.863008	0.920371	2478.56
8970-9_3	RIPK2	-0.0948424	-0.0186465	0.0906454	0.866175	0.92272	2487.65
7864-3_3	SIGL8	-0.202835	-0.0184588	0.122825	0.526261	0.680513	1511.42
3399-31_2	STAB2	-0.0887422	-0.0184001	0.107596	0.693694	0.808416	1992.29
3457-57_1	Periostin	-0.0897056	-0.018134	0.169507	0.163139	0.340506	468.536
8040-9_3	LEMD1	-0.079665	-0.018053	0.156273	0.237333	0.422572	681.622
6468-37_3	TKN4	-0.0843889	-0.0180293	0.187455	0.0933471	0.241091	268.093
3519-3_2	TARC	-0.133582	-0.0180166	0.0977157	0.799323	0.877879	2295.65
6400-33_3	P5I13	-0.120965	-0.0179992	0.130167	0.450941	0.626561	1295.1
3376-49_2	IL-17 RD	-0.0385655	-0.0179876	0.0895577	0.875482	0.926108	2514.38
5384-67_3	BRF-1	0.104382	-0.0178714	0.0886512	0.883006	0.931323	2535.99
4479-14_2	C1-Esterase Inhibitor	-0.0156221	-0.0178033	0.107959	0.689679	0.805841	1980.76
7818-101_3	GBP6	0.229491	-0.017779	0.117748	0.581081	0.721828	1668.87
4436-1_2	ENTP3	-0.00849702	-0.0175345	0.0845722	0.914066	0.95113	2625.2
8888-33_3	CX068	0.00750762	-0.0174739	0.0843909	0.915334	0.951444	2628.84
8458-111_3	a-Synuclein	-0.221133	-0.017289	0.106418	0.706707	0.815125	2029.66
5349-69_3	DLL1	-0.136204	-0.0172051	0.156182	0.237917	0.422572	683.299
3835-11_2	TLR2	0.0961866	-0.0171496	0.101976	0.754957	0.847961	2168.24
8002-27_3	Spinesin	-0.0593152	-0.0170723	0.141316	0.348603	0.533682	1001.19
9370-69_3	GGH	-0.00946736	-0.0170234	0.0847534	0.912788	0.950173	2621.53
4786-58_3	Cytidylate kinase	-0.0256192	-0.0169529	0.0976251	0.800239	0.878214	2298.29
9244-27_3	PPT1	-0.0473531	-0.0169476	0.164612	0.188094	0.365745	540.206
9581-4_3	PRP6	-0.167496	-0.0168698	0.123187	0.522419	0.677682	1500.39
6037-6_3	WFD12	-0.567536	-0.0167251	0.0768673	0.958886	0.975184	2753.92
8011-96_3	PAPL	-0.257215	-0.0166757	0.100435	0.771272	0.858563	2215.09
9848-22_3	Cyclin H	-0.035799	-0.0164526	0.118564	0.572156	0.715694	1643.23
4407-10_1	MSP	0.0365339	-0.016367	0.184554	0.102555	0.258366	294.537
4991-12_1	GPC5	0.217791	-0.0162978	0.0920051	0.854137	0.914987	2453.08
3298-52_2	Contactin-4	-0.0519045	-0.0162696	0.159355	0.218113	0.403101	626.419
5400-52_3	sLeptin R	0.198009	-0.0158412	0.116479	0.595033	0.735026	1708.93
2575-5_5	Leptin	-0.0499356	-0.0158365	0.121102	0.544655	0.695531	1564.25
5687-5_3	GLU2B	0.00675566	-0.0156972	0.0832125	0.923334	0.955953	2651.81
7968-15_3	CRTAM	-0.0269884	-0.0155016	0.0872009	0.894589	0.938134	2569.26
3283-21_1	BGH3	-0.0172778	-0.0155002	0.150743	0.27498	0.459152	789.741
7816-23_3	TMM27	-0.423681	-0.0154977	0.110134	0.665509	0.788507	1911.34
9467-24_3	ZNRF4	0.0359698	-0.0154747	0.123278	0.52146	0.677662	1497.63
9345-436_3	WFD13	-0.148314	-0.0153149	0.125816	0.494922	0.656543	1421.41
6226-69_3	EFHA1	0.395881	-0.0152506	0.0739666	0.970866	0.982844	2788.33
6643-62_3	CD47	-0.179811	-0.0152029	0.0781363	0.952806	0.97279	2736.46
10607-4_3	P4HTM	-0.253476	-0.0151953	0.0996193	0.779794	0.864031	2239.57
6454-38_3	Rho-GDIa	0.00598807	-0.0151563	0.0517585	0.99981	0.99981	2871.45
7640-29_3	LRP1B	0.00208846	-0.015145	0.151559	0.269139	0.453886	772.968
8309-12_3	HYAL1	-0.0443049	-0.0151059	0.146392	0.307453	0.491377	883.004
3803-10_2	CYTD	-0.0343664	-0.0150712	0.0998912	0.776963	0.862225	2231.44
11510-31_3	Apo L1	0.022339	-0.0149547	0.0784083	0.951436	0.972083	2732.53
5493-17_3	WNK3	-0.130995	-0.0149425	0.10814	0.687669	0.805131	1974.99
5939-42_3	TWEAK	-0.0645523	-0.0148674	0.128988	0.462649	0.636364	1328.73
4450-26_2	hnRNP A/B	-0.0421617	-0.0145016	0.108865	0.679622	0.800604	1951.87
4209-60_2	DRG-1	-0.0582348	-0.0144929	0.141588	0.34631	0.532157	994.601
7227-75_3	COCH	-0.0510337	-0.0144512	0.0980783	0.795644	0.876192	2285.09
9923-6_3	SOS1	-0.0908906	-0.0144276	0.103064	0.743289	0.842766	2134.73
3642-4_1	SLAF5	0.0446706	-0.0143676	0.0837563	0.919694	0.954249	2641.36
2631-50_2	IL-10 Rb	-0.0056549	-0.014357	0.138144	0.376091	0.558826	1080.13
3471-49_1	STK16	0.00213261	-0.0142578	0.143492	0.330537	0.516768	949.303
9168-31_3	Eotaxin-3	-0.00972428	-0.0140603	0.136693	0.389101	0.571903	1117.5
10630-5_3	HTAI2	-0.0714614	-0.013945	0.199964	0.0611763	0.183401	175.698
4468-21_2	SPHK2	-0.187042	-0.0138806	0.131617	0.43675	0.617296	1254.34
8015-144_3	CHCH2	0.15225	-0.0138329	0.120105	0.555407	0.70054	1595.13
8994-65_3	SLAMF8	0.11677	-0.0138216	0.156545	0.235588	0.421826	676.609
3868-8_1	SGTA	-0.0261283	-0.0137828	0.0655366	0.99202	0.996231	2849.08
7850-1_3	COX42	-0.124153	-0.0135786	0.11095	0.656424	0.779996	1885.25
2744-57_2	IgG	-0.069864	-0.0134809	0.158629	0.222525	0.408627	639.092
9742-59_3	BAT1	-0.0263126	-0.0133449	0.100979	0.765544	0.855503	2198.64
6384-19_3	WFDC3	-0.0618934	-0.0133202	0.0959028	0.817392	0.889898	2347.55
5346-24_3	CPNE1	-0.654682	-0.0132537	0.0775925	0.955475	0.973094	2744.12
10889-2_3	MRAP2	-0.437077	-0.0131892	0.248731	0.00907483	0.0588328	26.0629
3043-49_2	ON	0.0822478	-0.013079	0.131436	0.43851	0.617353	1259.4
6411-58_3	DB135	-0.0426942	-0.0130074	0.150743	0.27498	0.459152	789.741
9971-5_3	CSMD2	-0.0316146	-0.0128015	0.0944525	0.831425	0.899718	2387.85
5264-65_3	calreticulin	-0.0365505	-0.0126897	0.0693437	0.98476	0.992577	2828.23
3074-6_2	LBP	-0.0208175	-0.0126565	0.107505	0.694697	0.808416	1995.17
10817-26_3	TO20L	0.0287857	-0.0126178	0.0900109	0.87164	0.924086	2503.35
8235-48_3	SCG1	-0.0488808	-0.0125515	0.176759	0.13109	0.298092	376.491
8245-27_3	sICAM-5	-0.00918445	-0.012264	0.130801	0.444702	0.621501	1277.18
4971-1_1	CATZ	0.0272679	-0.0122071	0.0826686	0.926882	0.957211	2662
10416-79_3	MT1F	0.0669542	-0.0121661	0.133067	0.422809	0.603233	1214.31
6951-26_3	ASIC4	0.0378707	-0.0121411	0.0962654	0.813823	0.887021	2337.3
3709-4_2	ALT	-0.0441199	-0.0121327	0.115301	0.608051	0.742484	1746.32
2879-9_2	a1-Antichymotrypsin	-0.00123791	-0.0121177	0.0920957	0.853319	0.914794	2450.73
2182-54_1	C4b	0.0355522	-0.0119698	0.077955	0.953706	0.973094	2739.04
6917-49_3	LRRC3	-0.0258947	-0.0119678	0.184463	0.102854	0.258516	295.397
10337-83_3	CEBPB	0.276962	-0.011746	0.164249	0.190055	0.367816	545.838
7787-25_3	LIRA5	0.0563971	-0.0116364	0.158267	0.224757	0.409582	645.501
2625-53_4	HSP 90a/b	0.0121189	-0.0113982	0.100979	0.765544	0.855503	2198.64
8958-51_3	CHL1	0.00571065	-0.0113761	0.0693437	0.98476	0.992577	2828.23
7967-38_3	POTEM	-0.19001	-0.0113301	0.139322	0.365724	0.55166	1050.36
6627-25_3	LIPR1	0.0556469	-0.0113111	0.0870196	0.895996	0.938134	2573.3
5262-57_3	BCAR3	-0.00760947	-0.0113076	0.0974438	0.802068	0.878878	2303.54
6647-55_3	PolyUbiquitin K63	-0.0276194	-0.0112975	0.10814	0.687669	0.805131	1974.99
9176-3_3	MUC1	0.208465	-0.0112237	0.0811276	0.936431	0.962918	2689.43
9278-9_3	Epiphycan	-0.00210013	-0.0110896	0.107868	0.690683	0.806686	1983.64
9383-24_3	CH3L2	-0.0927434	-0.0110379	0.166697	0.177123	0.353507	508.696
5069-9_3	DAF	-0.0416343	-0.0109673	0.164068	0.191042	0.368979	548.672
3362-61_2	CRDL1	0.0271557	-0.0108655	0.169688	0.162268	0.339181	466.034
2843-13_2	SPINT2	0.0297954	-0.0108478	0.122734	0.527223	0.680838	1514.18
4717-55_2	IL-3	0.0143294	-0.0105194	0.112854	0.635226	0.763334	1824.37
6069-71_3	SUMF2	-0.0286708	-0.010503	0.0847534	0.912788	0.950173	2621.53
3294-55_2	CFC1	-0.0330644	-0.0103453	0.0998912	0.776963	0.862225	2231.44
11103-24_3	HSP 27	0.0436383	-0.0102848	0.0988035	0.788228	0.870688	2263.79
10892-8_3	OSMR	-0.00258243	-0.0102654	0.126269	0.490247	0.655794	1407.99
9339-204_3	FKBP2	-0.0476961	-0.0102603	0.110587	0.660462	0.784145	1896.85
11067-13_3	Osteocalcin	0.22389	-0.0102542	0.0614576	0.996552	0.998638	2862.1
9508-104_3	COLQ	-0.16382	-0.0100573	0.148749	0.289543	0.475181	831.566
4192-10_2	AK1A1	-0.0102138	-0.00998994	0.141679	0.345547	0.532157	992.412
3448-13_2	IR	0.0522386	-0.00995513	0.136149	0.39405	0.575057	1131.71
6412-26_3	IR3IP	-0.0422288	-0.00963912	0.12917	0.460838	0.634785	1323.53
7093-20_3	NRX3B	-0.0989828	-0.00956572	0.108503	0.683647	0.80337	1963.44
5745-64_3	PI15	-0.0471768	-0.00954972	0.148568	0.290893	0.475496	835.446
7247-1_3	GORAB	0.688089	-0.00948137	0.107143	0.698706	0.810782	2006.68
2618-10_2	ERBB4	-0.00613417	-0.00944794	0.088198	0.886687	0.933918	2546.57
3364-76_2	Cathepsin V	-0.0462859	-0.00928262	0.0876541	0.891031	0.936692	2559.04
5930-54_3	Troponin I	0.0707072	-0.00928234	0.115935	0.601035	0.738311	1726.17
3173-49_2	ASAHL	-0.0852079	-0.00886652	0.0932741	0.84252	0.908985	2419.72
9080-1_3	CO6A2	-0.259207	-0.00885875	0.114938	0.612067	0.745486	1757.86
4708-3_2	17-beta-HSD 1	-0.0636807	-0.00879969	0.102157	0.75302	0.846448	2162.67
7243-8_3	IFN-b	-0.413035	-0.00870433	0.202502	0.0559625	0.172636	160.724
8749-194_3	CD1D	-0.0845503	-0.00868544	0.116207	0.598032	0.736198	1717.55
2954-56_2	MMP-8	0.00516358	-0.00866839	0.0880167	0.888144	0.934341	2550.75
5131-15_3	TAJ	-0.0777009	-0.00861882	0.0800399	0.942718	0.966614	2707.48
7049-2_3	ADAM 23	0.0367745	-0.00851862	0.120105	0.555407	0.70054	1595.13
6520-87_3	MGP	-0.0578009	-0.00845703	0.0927302	0.847542	0.912689	2434.14
11514-196_3	CD59	0.00363439	-0.00844902	0.100798	0.767458	0.857308	2204.14
2763-66_2	FGF-20	0.0461233	-0.00842672	0.133793	0.415935	0.597581	1194.57
4979-34_2	DERM	0.0239742	-0.00839278	0.103698	0.736432	0.837306	2115.03
3498-53_2	IL-17	-0.0656327	-0.00835379	0.131436	0.43851	0.617353	1259.4
7766-25_3	ZP4	0.0050504	-0.00825507	0.104877	0.723613	0.826328	2078.22
4918-21_1	Kininogen, HMW	-0.0391269	-0.00821173	0.144126	0.325389	0.511504	934.518
2846-24_2	Ubiquitin+1	-0.0854011	-0.0082027	0.0962654	0.813823	0.887021	2337.3
6375-75_3	XXLT1	-0.0205648	-0.00817212	0.0945431	0.830559	0.89912	2385.37
5132-71_3	TCCR	-0.147858	-0.00810505	0.10107	0.764587	0.855503	2195.89
8303-102_3	MYG1	0.578563	-0.00804456	0.0926396	0.848373	0.912899	2436.53
4250-23_3	NSF1C	-0.0830293	-0.00786907	0.0873822	0.893173	0.93757	2565.19
5870-23_2	BAD	-0.576259	-0.0077131	0.190083	0.0856096	0.225777	245.871
7881-244_3	PAR16	-0.19378	-0.00767449	0.107505	0.694697	0.808416	1995.17
9815-5_3	RHG01	-0.237272	-0.00759333	0.125906	0.493985	0.656543	1418.73
10575-31_3	PUF60	-0.0155678	-0.00749424	0.102973	0.744266	0.84354	2137.53
4695-49_2	CASA	-0.126118	-0.00737791	0.120377	0.552468	0.700215	1586.69
5594-87_3	MESD2	-0.0766064	-0.00717463	0.108774	0.680628	0.801133	1954.76
2715-25_2	EPO-R	-0.0618735	-0.0070595	0.123187	0.522419	0.677682	1500.39
8018-43_3	VSIG2	0.114276	-0.00704105	0.130257	0.450047	0.626561	1292.53
4905-63_1	Coactosin-like protein	-0.010455	-0.00701498	0.0901015	0.870865	0.923947	2501.12
9749-190_3	L-plastin	0.0156336	-0.00693716	0.102429	0.750109	0.845492	2154.31
2616-23_18	ERBB2	0.203911	-0.0069172	0.0778644	0.954152	0.973094	2740.33
3796-79_2	ANGL4	0.0108812	-0.0069158	0.144217	0.324658	0.511475	932.419
8876-51_3	NRX2B	-0.314862	-0.00671372	0.115573	0.605042	0.741016	1737.68
3373-5_2	Granzyme H	-0.361806	-0.00655474	0.0979877	0.796566	0.876192	2287.74
10499-1_3	T106A	-0.0213085	-0.00649986	0.106236	0.708703	0.815789	2035.39
4996-66_1	HRG	-0.00542104	-0.00649825	0.125453	0.498676	0.658481	1432.2
3601-54_3	CHL1	0.0234526	-0.00589538	0.141044	0.350906	0.536065	1007.8
3635-76_4	OCAD1	0.0960074	-0.00573455	0.137872	0.378509	0.560639	1087.08
6283-60_3	MCEM1	-0.00333798	-0.00571003	0.102701	0.747191	0.844523	2145.93
10501-3_3	cytochrome c oxidase polypeptide VIa-liver	0.592037	-0.00564341	0.12355	0.518589	0.675765	1489.39
8899-75_3	UD18	-0.139529	-0.00548424	0.0747825	0.967762	0.980738	2779.41
9172-69_3	MMP-8	0.00678367	-0.00546752	0.0574692	0.998743	0.999299	2868.39
5139-32_3	UNC5H3	-0.0348881	-0.00502119	0.126178	0.491181	0.655821	1410.67
3404-51_2	TPSG1	-0.119245	-0.00487159	0.11657	0.594034	0.734107	1706.07
9190-7_3	CD63	0.00372352	-0.00481774	0.062364	0.995782	0.998215	2859.89
8305-18_3	SULF2	-0.0866303	-0.00478401	0.131436	0.43851	0.617353	1259.4
7871-16_3	T132A	0.0851155	-0.00465067	0.076686	0.959712	0.975679	2756.29
6581-50_3	Gc-Globulin, Mixed Type	-0.234916	-0.00440742	0.162255	0.201127	0.381783	577.638
8446-4_3	PACAP-27	0.0819508	-0.0043814	0.169054	0.165333	0.34105	474.838
9241-40_3	SIRPG	-0.0149051	-0.00410375	0.12083	0.54758	0.697406	1572.65
9850-38_3	IF1AX	-0.0330416	-0.00405159	0.0684373	0.9868	0.99372	2834.09
2788-55_1	MMP-3	-0.0510626	-0.00355149	0.0568347	0.998951	0.999299	2868.99
8019-73_3	STMN3	-0.362371	-0.0035089	0.131436	0.43851	0.617353	1259.4
2741-22_2	Siglec-6	0.599866	-0.00350381	0.100707	0.768413	0.857374	2206.88
9937-7_3	CXA1	-0.259428	-0.00345593	0.0812183	0.93589	0.962706	2687.88
3415-61_2	BSP	-0.249313	-0.00344944	0.14331	0.332018	0.517956	953.556
9865-40_3	UBE2B	-0.269853	-0.00341224	0.122734	0.527223	0.680838	1514.18
8343-224_3	PAPOG	0.286648	-0.00333212	0.114123	0.621117	0.753633	1783.85
8929-7_3	BDP1	-0.052921	-0.00329987	0.116298	0.597032	0.735282	1714.68
5494-52_3	RUXF	0.0614845	-0.00325755	0.151106	0.27239	0.456686	782.303
8098-37_3	THAS	-0.772594	-0.00295104	0.111313	0.652386	0.775839	1873.65
4842-62_2	Glypican 3	1.14931	-0.00287012	0.118745	0.570178	0.714776	1637.55
7738-299_3	STX2	-0.124309	-0.00278769	0.180022	0.118442	0.282765	340.166
4534-10_2	BSSP4	0.10133	-0.00278666	0.0793147	0.946698	0.969311	2718.92
2853-68_2	CHK1	-0.198439	-0.00268693	0.128807	0.464464	0.637639	1333.94
2640-3_2	MSP R	0.0237659	-0.00262587	0.103517	0.738395	0.838873	2120.67
9774-59_3	RN150	0.657672	-0.00247319	0.089467	0.876244	0.926232	2516.57
7121-2_3	SYT7	-0.188633	-0.00240434	0.184463	0.102854	0.258516	295.397
7903-18_3	VAMP3	-0.0704658	-0.00237035	0.148749	0.289543	0.475181	831.566
10671-67_3	CALY	-0.277171	-0.00236072	0.0920957	0.853319	0.914794	2450.73
5656-53_3	PP11	0.0423975	-0.00229695	0.0904641	0.867746	0.923367	2492.17
6601-1_3	UB2J2	0.0494456	-0.00222225	0.0869289	0.896696	0.938524	2575.31
2864-2_3	MEK1	-0.0044528	-0.00221562	0.130983	0.442928	0.620531	1272.09
8755-202_3	HLA-DPB1	0.315367	-0.00200235	0.156726	0.23443	0.421065	673.282
2683-1_2	iC3b	-0.057975	-0.0019452	0.0898296	0.873183	0.925039	2507.78
6366-38_3	TXD15	-0.0219756	-0.00167089	0.192168	0.0798629	0.217657	229.366
10445-20_3	ApoM	-0.0184386	-0.00162954	0.1124	0.640271	0.76747	1838.86
5094-62_3	JAML1	-0.224966	-0.00157931	0.138959	0.368894	0.554113	1059.46
5858-6_5	14-3-3 protein zeta/delta	-0.00695679	-0.00147692	0.0833031	0.922734	0.955953	2650.09
10054-3_3	GAN	-0.253779	-0.00137544	0.140682	0.353993	0.537635	1016.67
8842-16_3	GRM1C	-0.0182923	-0.00131787	0.116117	0.599033	0.737113	1720.42
10608-9_3	HIS1	-0.582289	-0.00129109	0.111494	0.650366	0.775839	1867.85
10827-67_3	LIGO3	-0.672351	-0.00119875	0.112854	0.635226	0.763334	1824.37
9598-23_3	CSMD1	-0.0474014	-0.00104637	0.0855693	0.906915	0.946805	2604.66
10583-1_3	TM108	1.17141	-0.000931071	0.0936367	0.839137	0.905675	2410
2806-49_2	Activin RIB	0.00861266	-0.000927821	0.0931835	0.843361	0.909551	2422.13
2869-68_3	PKC-D	-0.0427182	-0.00080473	0.065446	0.992153	0.996231	2849.46
9196-8_3	Galectin-7	0.260261	-0.000785623	0.158267	0.224757	0.409582	645.501
2558-51_3	b-Endorphin	-0.12189	-0.000751152	0.154007	0.252256	0.437753	724.481
3847-56_2	ETHE1	-0.0288798	-0.000728846	0.120377	0.552468	0.700215	1586.69
9102-28_3	ZFY27	0.203438	-0.00072199	0.168963	0.165775	0.34105	476.106
8817-29_3	CENPV	0.026541	-0.000558427	0.115935	0.601035	0.738311	1726.17
5089-11_3	IL-7 Ra	-0.0643353	-0.000419498	0.100435	0.771272	0.858563	2215.09
9182-3_3	sLRP1	-0.304431	-0.000237853	0.0668963	0.989809	0.99529	2842.73
9340-17_3	FKB14	0.0920205	-0.000174375	0.156363	0.236751	0.422572	679.948
4985-11_1	FABPE	-1.15576	-0.000149984	0.100073	0.77507	0.861789	2226
8358-30_3	Peroxiredoxin-3	0.0140216	-0.000125446	0.0770486	0.958049	0.974678	2751.52
2719-3_4	G-CSF-R	0.0289377	-4.80362e-05	0.128535	0.467194	0.639552	1341.78
9127-4_3	S26A5	-0.246313	0	0.159627	0.216475	0.401367	621.717
8067-21_3	KCNE3	0.245931	0.000177814	0.127991	0.472677	0.642465	1357.53
7815-49_3	IBPL1	-0.0557139	0.00033154	0.141951	0.343268	0.53032	985.864
9735-44_3	TACT	0.0756689	0.000335409	0.107324	0.696703	0.80911	2000.93
3299-29_2	Contactin-5	-0.0508506	0.000437114	0.0666244	0.990283	0.99529	2844.09
6255-74_3	CPXM1	0.0679613	0.000531477	0.151378	0.270459	0.455043	776.759
7204-1_3	CEA21	-0.806411	0.000639261	0.126904	0.483738	0.651946	1389.3
8069-85_3	CD3E	0.0476429	0.000730521	0.156907	0.233276	0.419779	669.968
9928-125_3	LECT1	-0.0343044	0.000840878	0.140682	0.353993	0.537635	1016.67
6574-11_3	FAIM3	-0.0323813	0.000850705	0.091008	0.863008	0.920371	2478.56
5104-57_3	NKp46	-0.181062	0.000980603	0.161802	0.203712	0.384655	585.06
7097-8_3	CDY1	-0.41784	0.00103775	0.141044	0.350906	0.536065	1007.8
9759-13_3	INDO	0.203032	0.00103897	0.102429	0.750109	0.845492	2154.31
9500-5_3	PHLD	0.108054	0.00107224	0.12636	0.489315	0.655794	1405.31
3191-50_2	WFKN1	0.0421415	0.00110685	0.169326	0.164014	0.34105	471.049
8760-10_3	DCNL5	-0.0246525	0.00112828	0.120468	0.551489	0.700215	1583.88
4392-54_2	FGF-12	0.022112	0.00114697	0.0854786	0.907578	0.946808	2606.56
3405-6_2	UFC1	-0.115194	0.0012309	0.0742386	0.969854	0.982165	2785.42
8028-22_3	SPINK5	-0.0277872	0.00143863	0.128807	0.464464	0.637639	1333.94
9884-8_3	PPIL1	-0.177356	0.00147039	0.121827	0.536881	0.690516	1541.92
7832-181_3	Protein disulfide isomerase A3	-0.0735877	0.00162876	0.111313	0.652386	0.775839	1873.65
8792-17_3	PODXL	-0.0339726	0.00171589	0.143673	0.329061	0.515301	945.063
8858-21_3	BATF3	-0.00211297	0.0018074	0.152103	0.265318	0.451151	761.994
7180-114_3	IFN14	-0.578353	0.00187358	0.131436	0.43851	0.617353	1259.4
2891-1_3	CD22	-0.02978	0.00190153	0.107415	0.6957	0.8086	1998.05
5727-35_3	B3GLT	-0.0112018	0.00199831	0.135877	0.39654	0.576931	1138.86
4696-2_2	FABP	-0.0334124	0.00202982	0.16715	0.174805	0.352063	502.041
3236-12_2	GSK-3 alpha/beta	0.0810925	0.00229966	0.105783	0.713685	0.818245	2049.7
4237-70_3	LCMT1	0.0521225	0.00238654	0.127991	0.472677	0.642465	1357.53
3873-51_2	TMA	0.000431644	0.00241679	0.110406	0.662481	0.786217	1902.65
7197-2_3	DJC15	-0.269726	0.00251693	0.153644	0.254707	0.439351	731.519
11083-23_3	NSE	0.293418	0.00252961	0.127991	0.472677	0.642465	1357.53
3042-7_2	Myoglobin	-0.275976	0.00257782	0.141588	0.34631	0.532157	994.601
8758-2_3	PCDA7	-0.121532	0.00262746	0.184373	0.103154	0.258516	296.259
5736-1_3	TRML2	-0.0268821	0.00263417	0.153372	0.256557	0.440952	736.831
7958-15_3	KIRR2	-0.0894394	0.00286811	0.146302	0.308157	0.492228	885.026
4359-87_1	DYRK3	-0.0297475	0.00292748	0.102701	0.747191	0.844523	2145.93
10529-19_3	ZN358	0.14248	0.0029777	0.0925489	0.849202	0.913107	2438.91
2737-22_2	NovH	0.00136285	0.00310891	0.126269	0.490247	0.655794	1407.99
9599-6_3	PIANP	-0.0417085	0.00311222	0.0955402	0.820937	0.892742	2357.73
8297-8_3	DJC10	0.0321723	0.00334606	0.138506	0.372882	0.555743	1070.92
8390-25_3	CX7A1	-0.16247	0.00336268	0.184101	0.104059	0.260103	298.858
3184-25_2	Coagulation Factor VII	0.0480628	0.00337169	0.130439	0.448261	0.625258	1287.41
2841-13_2	sFRP-3	-0.00680403	0.00344458	0.0628173	0.995351	0.998215	2858.65
3472-40_2	Survivin	0.0435086	0.00355858	0.107324	0.696703	0.80911	2000.93
2967-8_1	VCAM-1	-0.0542164	0.00359054	0.137962	0.377702	0.559732	1084.76
3324-51_1	LY9	-0.0494912	0.00359911	0.202592	0.0557836	0.172455	160.211
9832-33_3	HGD	-0.291239	0.00360427	0.139322	0.365724	0.55166	1050.36
3172-28_2	ARSB	-0.0611923	0.00365403	0.0794054	0.94621	0.969156	2717.51
5981-6_3	ES1	-0.0294243	0.00365771	0.100979	0.765544	0.855503	2198.64
2950-57_2	IGFBP-4	-0.0274375	0.00373002	0.0901922	0.870089	0.923806	2498.89
7994-41_3	ERO1B	0.0550492	0.00394803	0.121827	0.536881	0.690516	1541.92
2877-3_1	UBC9	-0.0234133	0.00402615	0.114123	0.621117	0.753633	1783.85
10606-34_3	TOIP1	-0.0209973	0.00426524	0.169688	0.162268	0.339181	466.034
9786-310_3	IEX1	0.038749	0.00457971	0.110044	0.666517	0.788726	1914.24
8866-53_3	QPCTL	0.000584865	0.00468434	0.0881073	0.887417	0.933918	2548.66
3859-50_2	PSA1	-0.047569	0.00470163	0.108503	0.683647	0.80337	1963.44
5063-12_2	CD244	-0.00548488	0.0047715	0.0588289	0.998183	0.999227	2866.78
8963-8_3	Vti1-rp1	-0.111562	0.00480574	0.0697063	0.983885	0.992524	2825.72
2751-16_2	Azurocidin	-0.00823749	0.00484213	0.130983	0.442928	0.620531	1272.09
7747-47_3	NDUBB	0.0247662	0.00492742	0.108049	0.688674	0.805323	1977.87
3178-5_2	CATC	0.0831415	0.00516547	0.121012	0.545629	0.696156	1567.05
10563-13_3	LYSM3	-0.164484	0.00529714	0.202864	0.0552498	0.171358	158.678
8352-26_3	SIG12	0.134608	0.00534912	0.114123	0.621117	0.753633	1783.85
7952-2_3	VTI1A	-0.0393283	0.00554946	0.0798586	0.943729	0.967305	2710.39
10364-6_3	SMAD2	-0.0786486	0.0058523	0.228245	0.0212775	0.0965387	61.109
6289-78_3	RHG36	0.280691	0.00589296	0.102701	0.747191	0.844523	2145.93
9974-8_3	DLL3	-0.0557013	0.00598054	0.0972625	0.803891	0.879199	2308.78
5657-28_3	SIA4A	0.0283816	0.0060509	0.146664	0.305347	0.491044	876.957
8250-2_3	PTPRJ	0.0223068	0.00620809	0.0843002	0.915965	0.951755	2630.65
10451-11_3	NUCB1	0.0245941	0.00621432	0.138687	0.371283	0.555089	1066.33
2632-5_2	IL-12 Rb1	0.000767063	0.00623049	0.104786	0.724602	0.826801	2081.06
6620-82_3	LIGO1	0.0418766	0.00624301	0.11521	0.609055	0.743078	1749.21
4437-56_3	ENTP5	0.0092809	0.0063405	0.0852973	0.908895	0.947494	2610.35
10452-24_3	SYT3	-0.02726	0.00639348	0.0871102	0.895294	0.938134	2571.28
8299-66_3	LIRA4	0.0260997	0.0064983	0.0989848	0.786362	0.870301	2258.43
2831-29_1	Kallikrein 11	-0.0421828	0.00650136	0.108865	0.679622	0.800604	1951.87
8380-244_4	DLK1	-0.0591149	0.00655506	0.125453	0.498676	0.658481	1432.2
10354-57_3	STAT3	-0.199131	0.00662132	0.138506	0.372882	0.555743	1070.92
2652-15_1	suPAR	0.0764625	0.00662573	0.220087	0.0292717	0.116761	84.0683
9117-4_3	IL-1F9	0.21428	0.00678829	0.0755076	0.96483	0.979149	2770.99
5308-89_2	Elastase	-0.147038	0.00679246	0.0671682	0.989319	0.995209	2841.32
6919-3_3	HBAZ	-0.034846	0.00686027	0.0829405	0.925119	0.956079	2656.94
8233-2_3	ITIH5	0.166532	0.00693967	0.199782	0.0615641	0.183988	176.812
6549-60_3	VTM2L	-0.137583	0.00696916	0.0972625	0.803891	0.879199	2308.78
10572-65_3	CST8	-0.0070992	0.00698674	0.0608231	0.997023	0.998761	2863.45
3730-81_2	TNR4	-0.0485036	0.00702344	0.085388	0.908237	0.947152	2608.46
5227-60_3	PDK1	0.126608	0.00703404	0.0979877	0.796566	0.876192	2287.74
8363-18_3	K132L	-0.0788414	0.00703953	0.0804025	0.940664	0.964852	2701.59
3435-53_2	FN1.4	0.0517949	0.0070647	0.101342	0.761707	0.853873	2187.62
2875-15_2	TBP	0.0468494	0.00707861	0.136149	0.39405	0.575057	1131.71
6365-62_3	KCT2	-0.196556	0.00712443	0.195341	0.0717447	0.202806	206.051
3554-24_1	Adiponectin	-0.000110533	0.00717199	0.130892	0.443814	0.621167	1274.63
2948-58_2	Growth hormone receptor	-0.0134743	0.00725526	0.112854	0.635226	0.763334	1824.37
3030-3_2	DC-SIGNR	-0.0391329	0.00728832	0.125363	0.499616	0.659117	1434.9
8087-250_3	RNF13	0.0904643	0.00735477	0.130892	0.443814	0.621167	1274.63
8265-225_3	LAP2B	-0.0297868	0.00769097	0.0665337	0.990438	0.99529	2844.54
7753-21_3	HTAI2	-0.0195063	0.00777343	0.138597	0.372082	0.555127	1068.62
11081-1_3	GPDA	-0.17199	0.00786609	0.13062	0.44648	0.623076	1282.29
5350-14_2	GPC6	0.0296101	0.00794709	0.105239	0.719648	0.822455	2066.83
9945-8_3	ARMC5	-0.0681243	0.0080281	0.110044	0.666517	0.788726	1914.24
3518-54_2	TAFI	0.00099141	0.00803241	0.117839	0.580088	0.72153	1666.01
11098-1_3	PDXK	0.0457578	0.00805879	0.125363	0.499616	0.659117	1434.9
3896-5_2	Phosphoglycerate mutase 1	-0.92101	0.00820175	0.115573	0.605042	0.741016	1737.68
6561-77_3	Ig K chain V-I region HK102-like	0.00112659	0.00821482	0.117839	0.580088	0.72153	1666.01
8967-6_3	DUS26	0.0128372	0.00829553	0.0920957	0.853319	0.914794	2450.73
8776-10_3	ERLN1	0.284126	0.00834663	0.115935	0.601035	0.738311	1726.17
3040-59_1	MIP-1a	0.589299	0.00841936	0.11095	0.656424	0.779996	1885.25
4330-4_2	PSA	-0.048384	0.00842315	0.0973532	0.80298	0.879199	2306.16
10372-18_3	STAT6	0.00742534	0.00843913	0.131798	0.434993	0.616634	1249.3
7155-46_3	C4b-binding protein beta chain	-0.521862	0.0084643	0.12917	0.460838	0.634785	1323.53
4133-54_2	Granzyme B	-0.00689216	0.00852827	0.0833031	0.922734	0.955953	2650.09
9787-23_3	COLEC12	-0.209838	0.00869334	0.138416	0.373682	0.556359	1073.22
10675-223_3	TMX2	0.151981	0.00873481	0.178571	0.123934	0.289963	355.939
4471-50_2	TGM3	-0.338335	0.00874069	0.156998	0.2327	0.419779	668.315
4568-17_2	SLIK5	-0.0754998	0.00899334	0.159536	0.21702	0.401858	623.281
7859-21_3	PCDGK	0.0173249	0.00901634	0.10252	0.749137	0.84506	2151.52
4883-56_2	Insulin	-0.0250238	0.00907644	0.111313	0.652386	0.775839	1873.65
8681-93_3	PGRC2	-0.0440759	0.00928588	0.115392	0.607048	0.74189	1743.44
9962-1_3	MUCDL	0.104799	0.00937052	0.0971719	0.804801	0.879524	2311.39
3624-3_4	Marapsin	0.0108728	0.00938693	0.0794054	0.94621	0.969156	2717.51
9439-454_3	CB082	-0.419109	0.00944794	0.210569	0.0418493	0.144983	120.191
5462-62_3	Ficolin-3	-0.0136443	0.00947565	0.112763	0.636235	0.763907	1827.27
5105-2_3	Nogo Receptor	-0.0308792	0.00950079	0.0911893	0.861412	0.920371	2473.98
5265-12_3	GRB2-related adapter protein 2	0.00114461	0.0095202	0.140863	0.352447	0.536422	1012.23
2961-1_2	Protein C	0.0221857	0.00960361	0.110678	0.659453	0.783271	1893.95
9271-101_3	STIM1	-0.0425783	0.00963964	0.0725163	0.975886	0.986188	2802.75
3168-8_2	ADAMTS-5	-0.0241842	0.00973932	0.0858412	0.904914	0.945403	2598.91
10842-7_3	GCNT4	-0.15212	0.00978237	0.0881073	0.887417	0.933918	2548.66
2602-2_2	Angiopoietin-2	0.0713956	0.00991431	0.135515	0.399873	0.580018	1148.44
6223-5_3	GUC2B	0.14662	0.00991958	0.121465	0.540763	0.693335	1553.07
3534-14_2	CD40 ligand, soluble	-0.0710926	0.00993075	0.130711	0.44559	0.622137	1279.74
5011-11_1	PBEF	0.0384156	0.0099898	0.0884699	0.884485	0.932541	2540.24
9478-69_3	KPRA	-0.357023	0.0100468	0.0896483	0.874717	0.925982	2512.19
3052-8_2	Fas ligand, soluble	-0.100849	0.0101379	0.120377	0.552468	0.700215	1586.69
7266-4_3	SPA9	0.0260748	0.0101883	0.128263	0.469931	0.641465	1349.64
9490-3_3	CD032	-0.0217055	0.0102294	0.0759608	0.962913	0.977549	2765.49
7927-16_3	SIA7E	0.333573	0.0102369	0.189811	0.0863842	0.226986	248.095
11101-18_3	TLR4	1.35719	0.0103358	0.0775925	0.955475	0.973094	2744.12
8488-33_3	gpIIbIIIa	0.0199205	0.0104475	0.169416	0.163576	0.34105	469.791
5753-21_3	F19A1	0.182132	0.0106214	0.117839	0.580088	0.72153	1666.01
7071-23_4	MA1B1	0.0118846	0.0106231	0.0872915	0.893882	0.937972	2567.23
9942-2_3	NXT1	0.244338	0.01069	0.109862	0.668535	0.790788	1920.03
8984-28_3	LRCH4	-0.152946	0.0107264	0.0962654	0.813823	0.887021	2337.3
8476-11_3	CgA	0.00633431	0.0108006	0.0629985	0.995169	0.998215	2858.13
9878-3_3	SULT 1E	-0.0100484	0.0108017	0.0689811	0.985601	0.992861	2830.65
3644-5_4	Soggy-1	0.00958826	0.0108515	0.105058	0.721631	0.824394	2072.53
10553-8_3	TOIP2	0.00519193	0.010912	0.0727883	0.974993	0.985632	2800.18
7965-25_3	HBAT	-0.0321255	0.0110155	0.100526	0.77032	0.858563	2212.36
9215-117_3	UBP25	-0.122411	0.0111088	0.105693	0.71468	0.818406	2052.56
6991-24_3	FUT9	-0.147363	0.0111554	0.152012	0.265952	0.451427	763.815
6597-24_3	TM157	-0.21737	0.0111641	0.0997099	0.778851	0.863653	2236.86
9249-17_3	TMEM9	0.0789198	0.011192	0.0902828	0.86931	0.923662	2496.66
4184-43_3	4EBP2	-0.263055	0.0112331	0.100616	0.769367	0.858105	2209.62
4495-33_2	Kininogen, HMW	-0.0204297	0.0113189	0.166878	0.176193	0.353123	506.026
8280-238_3	Vitronectin	-0.0219583	0.0115148	0.107596	0.693694	0.808416	1992.29
8060-7_3	NRG2	-0.330191	0.0115587	0.125906	0.493985	0.656543	1418.73
10638-1_3	TINF2	-0.498204	0.0116038	0.121555	0.539791	0.692399	1550.28
8097-77_3	LIPN	0.00951591	0.0117046	0.159083	0.219759	0.405102	631.149
6473-55_3	PLUNC	0.00516933	0.0117329	0.128716	0.465373	0.638277	1336.55
3738-54_4	CSF-1	0.0345907	0.0117416	0.125816	0.494922	0.656543	1421.41
2431-17_3	Cathepsin G	0.000347979	0.0118949	0.0857505	0.905584	0.945759	2600.84
9936-27_3	LNX1	-0.0558751	0.0119683	0.0998912	0.776963	0.862225	2231.44
7732-45_3	VAMP4	0.534404	0.0119816	0.149293	0.285517	0.471267	820.005
3082-9_2	ULBP-2	-0.0167131	0.012044	0.144398	0.3232	0.509737	928.23
8387-33_3	14-3-3E	-0.872784	0.012121	0.0834844	0.921525	0.955459	2646.62
6103-70_3	FCRL5	-0.0618568	0.0122063	0.136331	0.392396	0.574102	1126.96
2900-53_3	HCC-1	-0.0362678	0.0123037	0.0791334	0.947667	0.969611	2721.7
10454-99_3	DJC16	-0.185873	0.0123699	0.129351	0.45903	0.634119	1318.33
3741-4_3	IL-5	-0.00621037	0.012383	0.0925489	0.849202	0.913107	2438.91
4917-62_1	Integrin aVb5	-0.258457	0.0124313	0.106055	0.710697	0.816122	2041.12
3629-60_4	MRCKB	0.0301494	0.0124572	0.105511	0.716669	0.819703	2058.27
10045-47_3	CUL3	0.0937519	0.0124939	0.106508	0.705708	0.814955	2026.79
5026-66_1	RS3	-0.0154819	0.0125143	0.139141	0.367307	0.552596	1054.91
10660-33_3	S35B3	0.00235625	0.0125292	0.10814	0.687669	0.805131	1974.99
4188-1_2	Aflatoxin B1 aldehyde reductase	-0.109347	0.0125339	0.109046	0.677607	0.799872	1946.09
9171-11_3	CSRP3	0.0929129	0.0128119	0.172317	0.150048	0.324992	430.939
7050-5_3	NEGR1	0.0996044	0.0130782	0.142041	0.34251	0.530004	983.688
3898-5_2	PSD7	-0.258059	0.0130884	0.164431	0.189073	0.366655	543.017
8272-22_3	DHB7	-0.220919	0.0131612	0.154007	0.252256	0.437753	724.481
6291-55_3	Alcadein-beta	0.0190684	0.0131719	0.0979877	0.796566	0.876192	2287.74
3494-71_3	FGF-17	-0.00287175	0.0131754	0.158539	0.223081	0.408864	640.69
2677-1_1	ERBB1	0.00955816	0.0132491	0.0901015	0.870865	0.923947	2501.12
7866-11_3	DJC30	1.37343	0.0132917	0.156182	0.237917	0.422572	683.299
2911-27_2	Midkine	-0.412735	0.0133889	0.17694	0.13036	0.296902	374.393
3897-61_1	PLPP	-0.0202016	0.0134588	0.0727883	0.974993	0.985632	2800.18
5129-12_3	SREC-I	-0.00321138	0.0134962	0.087926	0.888869	0.934761	2552.83
4414-69_2	SP-D	-0.0215645	0.0136389	0.128263	0.469931	0.641465	1349.64
7989-5_3	CA226	-0.0645676	0.0137355	0.10814	0.687669	0.805131	1974.99
7892-132_3	K1467	-0.291173	0.013756	0.156635	0.235008	0.421313	674.944
2358-19_2	VEGF sR3	0.0602068	0.0138432	0.0902828	0.86931	0.923662	2496.66
6048-4_3	SIG10	-0.0663939	0.0138622	0.120196	0.554427	0.70054	1592.31
8000-17_3	KI2LA	0.343553	0.014023	0.126541	0.487453	0.654189	1399.96
6653-58_3	CD47	-0.0552409	0.0140575	0.136875	0.38746	0.570951	1112.78
9745-20_3	IF4E2	0.201881	0.0140779	0.108231	0.686664	0.805131	1972.1
9329-28_3	TRML1	0.00321197	0.0142353	0.115392	0.607048	0.74189	1743.44
7748-11_3	NDUV2	0.119138	0.0142401	0.120105	0.555407	0.70054	1595.13
2192-63_10	CTACK	-0.0150859	0.0144509	0.068256	0.987184	0.993758	2835.19
9731-29_3	SCAR3	-0.130522	0.0145286	0.0936367	0.839137	0.905675	2410
5599-88_3	PCYXL	-0.0215246	0.0146991	0.116661	0.593035	0.733189	1703.2
11513-92_3	CD38	-0.251385	0.0147152	0.0733321	0.97314	0.984452	2794.86
7861-9_3	ROR2	-0.190786	0.0147471	0.0999819	0.776017	0.862225	2228.72
10945-11_3	Syntaxin-6	-0.00168359	0.0147556	0.100707	0.768413	0.857374	2206.88
9504-19_3	RB27A	-0.281982	0.0148649	0.0703408	0.982269	0.991591	2821.08
7797-11_3	CC167	-0.0235271	0.0148663	0.108956	0.678615	0.800403	1948.98
5666-64_3	IL-1 sRII	0.232111	0.0151167	0.133521	0.418505	0.599774	1201.95
8775-61_3	FA24B	-0.0462781	0.0153284	0.0854786	0.907578	0.946808	2606.56
8854-59_3	RIR2B	-0.0435865	0.0153939	0.127901	0.473594	0.642799	1360.16
10008-43_3	GUC1A	-0.0786266	0.0155597	0.0699782	0.983206	0.992188	2823.77
4831-4_2	sL-Selectin	0.00414623	0.0155988	0.110044	0.666517	0.788726	1914.24
6606-61_3	KISS1	-0.144332	0.0156167	0.105783	0.713685	0.818245	2049.7
8932-1_3	ENTP6	0.0262789	0.0157262	0.095359	0.822701	0.893983	2362.8
6379-62_3	ATL2	0.0514764	0.0157485	0.135787	0.397371	0.577556	1141.25
9543-131_3	COG8	0.574902	0.0157802	0.108865	0.679622	0.800604	1951.87
5261-13_3	ABL2	0.0247011	0.0158131	0.150834	0.27433	0.458868	787.877
10640-9_3	TOIP2	-0.0429592	0.0158346	0.108412	0.684653	0.804223	1966.32
2447-7_4	GIIE	-0.0697864	0.0158624	0.0835751	0.920918	0.955174	2644.88
6419-75_3	GPA33	0.343319	0.0160202	0.179115	0.121851	0.287319	349.955
10070-22_3	PLCG2	-0.0894557	0.0160417	0.0952683	0.82358	0.894262	2365.32
5723-4_3	INSL3	-0.0105754	0.0160474	0.0816715	0.933146	0.961261	2680
10344-334_3	IL-10 Ra	0.0133312	0.0161385	0.0824873	0.928044	0.957723	2665.34
8367-142_3	VSIG1	-0.000983686	0.0161959	0.101432	0.760745	0.853128	2184.86
4976-57_1	CRK	-0.0713055	0.016224	0.128173	0.470846	0.642103	1352.27
9314-9_3	PSG5	0.96671	0.0162684	0.107777	0.691687	0.806875	1986.53
5260-80_3	TYK2	-0.00789574	0.0163871	0.166425	0.178524	0.355071	512.722
9245-1_3	KI2L4	-0.0632966	0.0165512	0.10397	0.733484	0.835276	2106.56
8851-42_3	F171B	0.0102776	0.016598	0.159536	0.21702	0.401858	623.281
7173-141_3	T132C	-0.029045	0.0166502	0.171864	0.152101	0.326972	436.834
10342-55_3	PIAS4	0.0266789	0.0166854	0.14893	0.288196	0.474327	827.7
4128-27_2	Eotaxin-2	-0.0380788	0.0167104	0.162165	0.201642	0.382003	579.116
3628-3_4	MP2K2	-0.0265619	0.0167109	0.0984409	0.791946	0.873452	2274.47
10647-18_3	ASCC1	0.0423096	0.016847	0.14603	0.310275	0.494787	891.111
10041-3_3	HNF4A	0.00457289	0.0168589	0.0652647	0.992416	0.996231	2850.22
7198-197_3	FA20B	-0.0126395	0.0169294	0.103336	0.740355	0.840434	2126.3
5810-25_3	Cripto	0.147542	0.0169968	0.179206	0.121506	0.287215	348.966
8307-47_3	CK068	-0.0540963	0.0170086	0.0804931	0.940144	0.964664	2700.09
9577-26_3	SYT2	0.0397795	0.01703	0.129079	0.461743	0.635727	1326.13
5410-53_3	CAD15	0.111422	0.0170974	0.176849	0.130724	0.297496	375.441
10948-14_3	PLD3	0.0455083	0.0171192	0.114123	0.621117	0.753633	1783.85
9826-135_3	Fragile histidine triad protein	0.965613	0.0171875	0.0892857	0.877761	0.927495	2520.93
6986-17_3	HS3SB	-0.0129163	0.0173757	0.151559	0.269139	0.453886	772.968
4232-19_2	IGF-I sR	0.00661198	0.0174057	0.0974438	0.802068	0.878878	2303.54
8394-56_3	RNase 2	-0.0866651	0.0174601	0.105239	0.719648	0.822455	2066.83
6221-1_3	ADPGK	-0.00838856	0.0174657	0.166334	0.178994	0.355758	514.07
2666-53_2	Bone proteoglycan II	-0.0357039	0.0175511	0.130801	0.444702	0.621501	1277.18
5007-1_1	MAPK14	-0.0231943	0.0175884	0.138959	0.368894	0.554113	1059.46
7069-9_4	TSNA1	-0.288289	0.0177422	0.0929115	0.845875	0.911235	2429.35
9355-26_3	LAMP3	0.505145	0.0177432	0.234953	0.0162272	0.0819061	46.6046
6472-40_3	GP100	0.0692079	0.0177754	0.127991	0.472677	0.642465	1357.53
7792-58_3	CC90B	0.210624	0.0178113	0.0887418	0.882263	0.931323	2533.86
3766-51_4	STX1a	0.0309746	0.0178738	0.082578	0.927464	0.957468	2663.68
8039-41_3	F177A	-0.0481219	0.0178818	0.0951777	0.824458	0.894877	2367.84
4460-8_2	PDPK1	-0.172871	0.0179135	0.121646	0.538821	0.692391	1547.49
3022-4_2	CTLA-4	-0.0764862	0.0179454	0.156635	0.235008	0.421313	674.944
4278-14_3	Protein disulfide-isomerase	-0.105656	0.0181397	0.124909	0.504331	0.662597	1448.44
7082-2_3	B3GN6	0.00537123	0.0181959	0.161439	0.205798	0.386561	591.051
2723-9_2	IL-1F7	-0.00267818	0.0182054	0.117386	0.585059	0.724888	1680.29
6362-6_3	AUGN	0.00886986	0.0182925	0.0947244	0.828824	0.898597	2380.38
7060-2_3	ERO1A	0.0635737	0.0183147	0.136784	0.38828	0.571281	1115.14
3583-54_4	Arylsulfatase A	0.392731	0.0185161	0.0874728	0.892461	0.937166	2563.15
5383-14_3	BAFF Receptor	0.189884	0.0185687	0.149384	0.28485	0.470979	818.09
2989-17_2	IFN-g	-0.0678596	0.0186087	0.093818	0.837435	0.904518	2405.11
6296-36_3	OIT3	-0.0437853	0.0186304	0.15174	0.267861	0.453328	769.297
4995-16_1	HPG-	-0.00396055	0.0186653	0.153644	0.254707	0.439351	731.519
6578-29_3	TNMD	-0.491951	0.0188076	0.15165	0.2685	0.453606	771.131
6575-79_3	ATL1	1.28997	0.0188214	0.135877	0.39654	0.576931	1138.86
9512-24_3	SPY1	0.268374	0.018967	0.0969906	0.806617	0.881173	2316.6
3865-53_1	RSK-like protein kinase	-0.0425205	0.0189908	0.100707	0.768413	0.857374	2206.88
9550-153_3	TTC17	0.694262	0.0191874	0.196701	0.0684862	0.195519	196.692
2598-9_3	4-1BB	-0.0417264	0.0192727	0.0886512	0.883006	0.931323	2535.99
4145-58_2	Neurotrophin-3	-0.253278	0.0193217	0.0773205	0.956774	0.974071	2747.85
9321-400_3	NMB	-0.0814721	0.0193708	0.0761421	0.962129	0.977098	2763.23
10367-26_3	IL-12	1.41956	0.0194335	0.100254	0.773173	0.860013	2220.55
5463-22_3	GAS1	0.172584	0.0195203	0.156001	0.239089	0.423866	686.662
9012-1_3	PRP6	0.201508	0.0196197	0.102792	0.746217	0.844523	2143.13
4862-63_1	BMP RII	0.110458	0.0197697	0.155729	0.240853	0.425419	691.731
6357-83_3	ELA3B	0.137208	0.0198072	0.113579	0.62716	0.758082	1801.2
5612-16_3	HINT2	0.111932	0.0198841	0.0998006	0.777908	0.86294	2234.15
8024-64_3	TPST2	0.0239156	0.0199162	0.127901	0.473594	0.642799	1360.16
10000-28_3	CRBB2	-0.616227	0.0200201	0.138778	0.370486	0.554763	1064.04
9312-8_3	AZGP1	-0.0211654	0.0200853	0.115029	0.611063	0.745211	1754.97
5623-11_3	CLM1	0.0164826	0.0200941	0.107415	0.6957	0.8086	1998.05
8269-327_3	ARSK	0.00684167	0.0201093	0.0998912	0.776963	0.862225	2231.44
6594-64_3	SMDC1	0.0192014	0.0202532	0.163796	0.192529	0.370357	552.943
9981-18_3	K1467	-1.39201	0.0202724	0.0776831	0.955037	0.973094	2742.87
6538-90_3	K2013	-0.0595067	0.0203211	0.169054	0.165333	0.34105	474.838
3452-17_2	LCK	0.0226969	0.0204321	0.105783	0.713685	0.818245	2049.7
8240-207_3	GPNMB	-0.0249395	0.0205193	0.127991	0.472677	0.642465	1357.53
4467-49_2	SPARCL1	-0.0178063	0.0205935	0.0804931	0.940144	0.964664	2700.09
4481-34_2	C4	0.0513503	0.0205986	0.133974	0.414227	0.595723	1189.66
2635-61_2	Layilin	0.222718	0.0205989	0.0926396	0.848373	0.912899	2436.53
3357-67_2	CDK2/cyclin A	0.024887	0.0206015	0.115482	0.606045	0.741611	1740.56
4994-178_1	hnRNP K	-0.264054	0.0206031	0.179387	0.12082	0.286063	346.994
5490-53_3	Testican-1	0.0434028	0.0206122	0.205221	0.050805	0.163212	145.912
3874-8_1	UB2L3	-0.062832	0.0206913	0.0861131	0.902892	0.944321	2593.1
7118-24_3	IGDC3	-0.107022	0.0207718	0.161893	0.203193	0.384433	583.57
6151-18_3	MP2K3	0.125206	0.0207862	0.179297	0.121163	0.286638	347.979
10665-30_3	HBG1	-0.094663	0.020802	0.128535	0.467194	0.639552	1341.78
8945-7_3	F175B	-0.198599	0.0208047	0.0748731	0.967404	0.980722	2778.39
9065-28_3	TXLNA	0.755358	0.020842	0.156091	0.238502	0.423088	684.979
5627-53_3	GON1	-0.0763495	0.0209985	0.197244	0.0672186	0.193633	193.052
6354-13_3	HPHL1	0.0194163	0.0210616	0.0904641	0.867746	0.923367	2492.17
2785-15_2	MCP-2	-0.0113442	0.0211064	0.104786	0.724602	0.826801	2081.06
8822-163_3	RN219	-0.640102	0.0211143	0.091008	0.863008	0.920371	2478.56
9843-5_3	ACTN1	-0.0840335	0.0211682	0.0955402	0.820937	0.892742	2357.73
6405-74_3	PSG2	0.372857	0.0211972	0.0988035	0.788228	0.870688	2263.79
7992-3_3	TMIE	0.0163277	0.0212375	0.128263	0.469931	0.641465	1349.64
8697-38_3	Glypican 1	0.0170665	0.0213117	0.122915	0.525299	0.679882	1508.66
10063-10_3	FANCL	0.0907997	0.0213427	0.128263	0.469931	0.641465	1349.64
9266-1_3	sTREM-1	-0.068594	0.0213582	0.138687	0.371283	0.555089	1066.33
5201-50_4	PDE9A	0.735549	0.0215697	0.207578	0.0466725	0.154606	134.043
2865-77_2	MOZ	-0.0742857	0.0216088	0.130167	0.450941	0.626561	1295.1
9388-18_3	MCEE	-0.148311	0.0217448	0.151287	0.271102	0.45559	778.604
4721-54_2	TFF3	0.707086	0.0217716	0.192259	0.0796206	0.217574	228.67
6506-54_3	TMEDA	-0.0254553	0.0219216	0.102611	0.748164	0.844958	2148.73
5082-51_3	IL-1 sR9	0.0606361	0.0220281	0.156817	0.233852	0.420553	671.624
8242-9_3	CLC2L	0.0327564	0.0220507	0.138053	0.376896	0.558826	1082.45
3616-3_5	GNS	-0.0167151	0.0220548	0.0832125	0.923334	0.955953	2651.81
8785-1_3	ARMC5	-0.650088	0.0220911	0.189177	0.0882145	0.23053	253.352
2888-49_2	C7	0.00915469	0.0220936	0.089467	0.876244	0.926232	2516.57
3800-71_2	CK-BB	0.645276	0.022282	0.158448	0.223639	0.409081	642.291
8089-173_3	NR4A1	-0.375008	0.0223491	0.174311	0.14128	0.313568	405.757
7018-10_3	TSR3	0.110001	0.022371	0.124909	0.504331	0.662597	1448.44
5629-58_3	NKG2A	0.102448	0.0224047	0.103154	0.742312	0.842323	2131.92
7897-75_3	DLG3	0.470057	0.0224122	0.156091	0.238502	0.423088	684.979
9849-13_3	APEX1	-0.00379541	0.0224372	0.0921864	0.852499	0.914794	2448.38
8978-30_3	M4K3	-0.0440275	0.0224687	0.125997	0.493049	0.656543	1416.04
3634-5_4	OBCAM	0.0371198	0.0224941	0.123278	0.52146	0.677662	1497.63
5739-75_3	KTDAP	-0.0469836	0.0227996	0.113125	0.6322	0.76289	1815.68
3026-5_2	Calpastatin	0.0628774	0.0228072	0.0875635	0.891747	0.936759	2561.1
7919-278_3	FAM3D	-0.573046	0.0228289	0.142132	0.341753	0.529976	981.515
3627-71_4	MMEL2	0.0726478	0.0228871	0.125453	0.498676	0.658481	1432.2
5610-32_3	CJ038	0.93684	0.0229247	0.103064	0.743289	0.842766	2134.73
4990-87_1	GP1BA	0.0525988	0.0229277	0.118474	0.573146	0.715996	1646.08
7944-1_3	KI3L3	-0.226626	0.0229851	0.0921864	0.852499	0.914794	2448.38
2999-6_2	LSAMP	-0.00902692	0.0230338	0.138687	0.371283	0.555089	1066.33
4551-72_3	GP114	0.102097	0.0230693	0.158629	0.222525	0.408627	639.092
8345-27_3	GPX7	-0.224969	0.023143	0.0956309	0.820053	0.892457	2355.19
7020-13_3	CHST5	-0.0229338	0.0232953	0.156635	0.235008	0.421313	674.944
10761-5_3	TMED2	-0.993838	0.0233194	0.174583	0.140117	0.312435	402.417
8971-9_3	NRX1A	0.0173061	0.0233758	0.0814902	0.934251	0.96171	2683.17
6604-59_3	CD031	0.0947596	0.0234447	0.145486	0.314543	0.49965	903.368
9959-60_3	TM59L	0.0170061	0.0235914	0.122734	0.527223	0.680838	1514.18
8037-53_3	DJB14	-0.0361026	0.0236284	0.177302	0.128909	0.294888	370.226
9931-20_3	Keratin-1	-0.114765	0.0236769	0.134155	0.412523	0.595359	1184.76
8397-147_3	QSOX2	0.0196674	0.0237858	0.117839	0.580088	0.72153	1666.01
3066-12_1	Galectin-3	0.015421	0.0239213	0.0946338	0.829693	0.89886	2382.88
9595-11_3	B4GT2	0.0050249	0.0239315	0.0875635	0.891747	0.936759	2561.1
6217-23_3	QSCN6	0.00934641	0.0239402	0.0920051	0.854137	0.914987	2453.08
8347-222_3	DB129	-0.0487843	0.0239764	0.128626	0.466283	0.638915	1339.17
5885-55_3	eIF-4H	-0.0767195	0.0240148	0.0979877	0.796566	0.876192	2287.74
4440-15_2	FCRL3	0.0980601	0.0240843	0.0870196	0.895996	0.938134	2573.3
2649-77_2	sICAM-3	0.00719034	0.0241673	0.130167	0.450941	0.626561	1295.1
9092-33_3	ANGL1	-0.0239733	0.0242116	0.128445	0.468105	0.640495	1344.4
3905-62_1	UBE2N	-0.138677	0.0242541	0.141407	0.347837	0.533363	998.989
4230-1_2	IF4G2	-0.111238	0.0244463	0.0988941	0.787295	0.870663	2261.11
2599-51_2	4-1BB ligand	-0.0988364	0.0244479	0.130711	0.44559	0.622137	1279.74
8877-22_3	F176C	-0.146748	0.0244815	0.141588	0.34631	0.532157	994.601
5617-41_3	NPFF	-0.115228	0.0246338	0.199782	0.0615641	0.183988	176.812
5351-52_3	hnRNP A2/B1	-0.00694145	0.0246774	0.0881073	0.887417	0.933918	2548.66
3035-80_2	IL-19	-0.0558765	0.0247229	0.125725	0.495859	0.657482	1424.11
5719-66_3	CI061	0.596838	0.0248282	0.0977157	0.799323	0.877879	2295.65
10081-17_3	SATB2	0.0455381	0.0249645	0.127538	0.477271	0.645957	1370.72
2634-2_2	IL-2 sRg	-0.0660075	0.024985	0.106508	0.705708	0.814955	2026.79
10073-22_3	TYDP1	-0.295171	0.0250659	0.10814	0.687669	0.805131	1974.99
7081-2_4	BT3A1	-0.045508	0.0251027	0.0818528	0.93203	0.960456	2676.79
2829-19_2	IL-27	-0.083745	0.0251639	0.118655	0.571167	0.715391	1640.39
3872-2_1	TCTP	-0.026108	0.0252854	0.151197	0.271745	0.456138	780.452
5451-1_3	ALCAM	0.0389147	0.025296	0.120286	0.553447	0.70054	1589.5
9594-30_3	ZNT5	0.150092	0.0253624	0.0996193	0.779794	0.864031	2239.57
6508-68_3	SG1D2	0.0190882	0.0254138	0.125816	0.494922	0.656543	1421.41
8897-3_3	L37A2	-0.107187	0.0254612	0.101432	0.760745	0.853128	2184.86
3122-6_2	SMAC	-0.000363776	0.0255493	0.166516	0.178056	0.354631	511.377
7234-12_3	GT252	-1.10569	0.0255585	0.159083	0.219759	0.405102	631.149
4561-65_2	Livin B	-0.025969	0.0255668	0.189358	0.0876882	0.229363	251.841
3538-26_1	dopa decarboxylase	-0.0177868	0.0255917	0.101251	0.762668	0.854616	2190.38
3200-49_2	kallikrein 13	0.0391546	0.0256746	0.0919144	0.854953	0.91552	2455.42
4559-64_2	KYNU	-0.0888951	0.0256849	0.0989848	0.786362	0.870301	2258.43
3010-53_2	TSLP	-0.0305077	0.0257271	0.109137	0.6766	0.799011	1943.2
8072-19_3	MZT1	-0.00825816	0.0257594	0.0761421	0.962129	0.977098	2763.23
8071-114_3	PCDB7	0.134977	0.0257816	0.100435	0.771272	0.858563	2215.09
3497-13_2	IFN-aA	-0.00618042	0.0259952	0.126813	0.484666	0.651972	1391.96
8268-98_3	HS3SA	-0.10145	0.0260396	0.102611	0.748164	0.844958	2148.73
3860-7_2	PSA6	-0.0446856	0.0260975	0.119833	0.558352	0.703327	1603.59
5803-24_3	C3d	0.0262223	0.0262253	0.0975344	0.801154	0.878878	2300.91
9005-16_3	PLXA1	-0.251559	0.026262	0.128173	0.470846	0.642103	1352.27
3805-16_2	Endocan	0.0477022	0.0263787	0.141316	0.348603	0.533682	1001.19
7054-87_3	CLC2D	0.0197839	0.0264557	0.132796	0.425403	0.605731	1221.76
8838-10_3	CASC4	0.0117892	0.0265833	0.128716	0.465373	0.638277	1336.55
9315-16_3	MUL1	0.404647	0.0266498	0.136603	0.389923	0.572233	1119.86
3723-1_2	BNP-32	0.0411698	0.0267015	0.169235	0.164453	0.34105	472.309
10917-40_3	GBGT2	-0.443194	0.0267566	0.146392	0.307453	0.491377	883.004
3413-50_2	BFL1	-0.00978748	0.0267931	0.0940899	0.834869	0.902765	2397.74
8236-8_3	CR032	0.240984	0.0268709	0.0775925	0.955475	0.973094	2744.12
3473-78_2	Thrombopoietin Receptor	0.0751122	0.0269419	0.145848	0.311693	0.495946	895.183
8256-57_3	RANK	-0.53166	0.0269952	0.153463	0.255939	0.440946	735.057
8983-7_3	GOLM1	-0.0143528	0.0271121	0.0959935	0.816502	0.889266	2344.99
9201-13_3	Transgelin-2	0.00471314	0.0271911	0.107234	0.697705	0.809947	2003.81
4271-75_2	PFD5	0.0258007	0.027269	0.0945431	0.830559	0.89912	2385.37
4217-49_3	ERAB	0.0241295	0.027361	0.17422	0.14167	0.313947	406.875
7806-33_3	B4GT7	0.0489867	0.0275926	0.138778	0.370486	0.554763	1064.04
5927-4_3	WISP-3	1.30712	0.0276534	0.148115	0.29429	0.478325	845.201
5246-64_3	cGMP-stimulated PDE	0.00679495	0.0277379	0.102248	0.752051	0.846352	2159.89
7765-15_3	ITM2A	0.0778265	0.0277556	0.199601	0.061954	0.184395	177.932
4490-65_2	IL-3 Ra	-0.0487627	0.0277663	0.191806	0.0808383	0.218298	232.168
8951-162_3	CSPG4	-0.00890063	0.0278846	0.191806	0.0808383	0.218298	232.168
8009-121_3	SURF1	0.0351254	0.027887	0.0707941	0.981049	0.991056	2817.57
6609-22_3	CN37	-0.0648128	0.0279548	0.123731	0.516678	0.6745	1483.9
3516-60_2	SDF-1	0.00901969	0.028047	0.118383	0.574136	0.716922	1648.92
3651-50_5	VEGF sR2	0.0249982	0.0281611	0.0989848	0.786362	0.870301	2258.43
6603-18_3	KALM	0.12853	0.0281851	0.207306	0.0471339	0.155239	135.369
7773-20_3	KI2L2	-0.000924764	0.0282762	0.140863	0.352447	0.536422	1012.23
3612-6_4	EphB4	0.0782903	0.0282786	0.131345	0.439392	0.618291	1261.93
9486-13_3	DB125	0.134395	0.028345	0.141407	0.347837	0.533363	998.989
9180-6_3	INGR2	-0.114519	0.0283778	0.243111	0.0115486	0.0682112	33.1676
5628-21_3	SEM3G	0.0163553	0.0284753	0.0900109	0.87164	0.924086	2503.35
3363-31_4	CSK	-0.0840285	0.0284975	0.148387	0.292249	0.476626	839.338
6430-36_3	F19A2	-0.211171	0.0285061	0.185007	0.101068	0.255517	290.268
7244-16_3	TM149	0.163179	0.0285964	0.219543	0.0298885	0.118484	85.8396
9227-15_3	PD-1	-0.0890256	0.0286229	0.154369	0.249823	0.437225	717.492
5694-57_3	SMOC1	-0.0227223	0.0286661	0.118474	0.573146	0.715996	1646.08
4146-58_2	Neurotrophin-5	-0.0538932	0.028782	0.154007	0.252256	0.437753	724.481
8339-72_3	Gastrin-releasing peptide	0.013821	0.0287898	0.156907	0.233276	0.419779	669.968
9398-30_3	GALP	-0.00733036	0.0287951	0.0987128	0.789159	0.871382	2266.46
9909-4_3	CLM9	-0.150689	0.0288529	0.0978064	0.798405	0.877543	2293.02
5354-11_3	Keratin 18	-0.228505	0.0288783	0.126813	0.484666	0.651972	1391.96
5092-51_3	JAG1	0.0386374	0.0289127	0.173223	0.14601	0.319376	419.341
6590-54_3	Neuropilin-2	-0.0229344	0.0289906	0.0903735	0.868529	0.923516	2494.42
5452-71_3	ASGR1	0.131974	0.0290391	0.153372	0.256557	0.440952	736.831
7185-29_3	GPV	0.151964	0.0290616	0.215192	0.0352487	0.131564	101.234
10953-14_3	CLC2A	0.0431426	0.0291186	0.102883	0.745241	0.84398	2140.33
4987-17_1	FCAR	-0.0670752	0.0291441	0.151378	0.270459	0.455043	776.759
9400-40_3	Galectin-7	0.123648	0.0291514	0.19942	0.0623461	0.184406	179.058
9436-2_3	ID-1	-0.229412	0.0292107	0.106055	0.710697	0.816122	2041.12
8255-34_3	MRVI1	-0.265132	0.0292228	0.136693	0.389101	0.571903	1117.5
2997-8_1	JAM-B	0.0341942	0.0295186	0.123368	0.520502	0.677337	1494.88
5335-73_3	annexin VI	0.00633051	0.02953	0.113851	0.624138	0.756339	1792.52
7070-25_4	KELL	0.118451	0.0295361	0.248368	0.0092186	0.0590978	26.4758
2605-49_2	CD30	0.0294739	0.0295689	0.116298	0.597032	0.735282	1714.68
9522-3_3	AIF	0.472247	0.0295794	0.138597	0.372082	0.555127	1068.62
6035-2_3	SIAT1	-0.0371621	0.0295956	0.163615	0.193525	0.371279	555.805
3605-77_4	MASP3	0.0600416	0.0296755	0.125635	0.496797	0.657815	1426.8
4960-72_1	annexin I	0.0203117	0.0297764	0.113216	0.631192	0.761994	1812.78
7625-27_3	14-3-3 protein theta	0.0428911	0.0298574	0.119833	0.558352	0.703327	1603.59
10076-1_3	AP4M1	-0.0665802	0.0298886	0.182288	0.110262	0.270892	316.673
8924-55_3	CALY	-0.0635511	0.0299444	0.122643	0.528185	0.681468	1516.95
7174-15_3	CD38	0.153119	0.0300066	0.191443	0.0818237	0.21901	234.998
10580-14_3	SFTA2	-0.0369654	0.0300803	0.149202	0.286185	0.471828	821.924
10489-19_3	TCTA	-0.0323158	0.0301344	0.112854	0.635226	0.763334	1824.37
8282-15_3	CLC5A	0.182976	0.030161	0.11376	0.625145	0.756602	1795.42
2975-19_2	CTGF	-0.00600728	0.0301905	0.166606	0.177589	0.353945	510.035
7003-4_3	GLT10	0.471031	0.030205	0.132796	0.425403	0.605731	1221.76
9530-6_3	LMCD1	-0.0463278	0.0303297	0.125091	0.502442	0.661327	1443.01
7179-69_3	NFASC	0.117479	0.0304005	0.142857	0.33574	0.523193	964.246
8258-22_3	UXS1	-0.0247212	0.0304229	0.0971719	0.804801	0.879524	2311.39
9773-15_3	RN149	-0.0653371	0.0304489	0.178843	0.122889	0.288819	352.936
2333-72_1	TGF-b1	0.0277164	0.0304761	0.151831	0.267224	0.452516	767.466
9899-28_3	KIF1C	-0.0478757	0.0304833	0.154188	0.251038	0.437753	720.98
3314-74_2	GFRa-1	-0.122206	0.0305046	0.10669	0.70371	0.814613	2021.05
8382-47_3	MAPK5	-0.106768	0.0305594	0.136421	0.391571	0.573771	1124.59
5667-3_3	SEM3B	-0.0818204	0.0305852	0.212292	0.0392741	0.139425	112.795
4963-19_1	ARP19	-0.346353	0.0307593	0.154732	0.247407	0.434324	710.554
9220-7_3	EPHB3	0.150992	0.0307964	0.135334	0.401546	0.581563	1153.24
10914-4_3	CHIC2	0.0266954	0.030861	0.103698	0.736432	0.837306	2115.03
3181-50_2	Cathepsin S	0.0817867	0.0308876	0.123912	0.51477	0.673847	1478.42
6398-12_3	LONM	-0.0408374	0.0309001	0.120921	0.546604	0.696781	1569.85
2849-49_1	AIF1	0.0477624	0.0309798	0.0982596	0.793797	0.875158	2279.79
9169-14_3	SUMO3	-0.229345	0.030993	0.143492	0.330537	0.516768	949.303
3329-14_2	PGRP-S	-0.223799	0.0311757	0.0985315	0.791018	0.872764	2271.8
6553-68_3	CCD19	-0.0105299	0.0313025	0.138597	0.372082	0.555127	1068.62
8634-187_3	ADA19	0.125074	0.0313047	0.136603	0.389923	0.572233	1119.86
3623-84_4	LY86	-0.0300254	0.0314927	0.104605	0.72658	0.828729	2086.74
6633-43_3	UPK3L	0.0174641	0.0315492	0.118564	0.572156	0.715694	1643.23
5271-5_1	RAC3	-0.0287778	0.0315512	0.146392	0.307453	0.491377	883.004
9954-2_3	NPPL3	-0.0048577	0.0316263	0.106327	0.707705	0.815294	2032.53
9719-145_3	MMP-16	0.559471	0.031649	0.114938	0.612067	0.745486	1757.86
2644-11_2	PKC-A	0.0560203	0.0317526	0.161711	0.204232	0.385102	586.554
8699-43_3	CRIM1	-0.0154209	0.0317702	0.163796	0.192529	0.370357	552.943
8700-325_3	GLT11	-0.0463131	0.031857	0.169869	0.161401	0.338847	463.543
10663-42_3	INSI1	-0.161863	0.0318966	0.172226	0.150457	0.325386	432.113
8957-72_3	XTP3B	0.109457	0.0320207	0.181925	0.111539	0.272255	320.339
2704-74_1	TACI	-0.0473473	0.0320671	0.119289	0.564255	0.708898	1620.54
3855-56_1	Peroxiredoxin-1	-0.0171341	0.0321189	0.128626	0.466283	0.638915	1339.17
7983-1_3	PCDGM	0.0365916	0.032218	0.126813	0.484666	0.651972	1391.96
3024-18_2	a2-Antiplasmin	-0.0128525	0.0322651	0.175127	0.137815	0.308258	395.804
5001-6_2	Mammaglobin 2	0.0163744	0.0323176	0.159173	0.219209	0.404868	629.569
9264-11_3	CATO	-0.525829	0.0323493	0.156182	0.237917	0.422572	683.299
9819-110_3	PO210	-0.108698	0.0323919	0.101795	0.75689	0.8498	2173.79
8070-88_3	DLG4	-0.0845667	0.0324504	0.120377	0.552468	0.700215	1586.69
7991-54_3	IQCF1	-0.018805	0.0324517	0.182107	0.110899	0.271759	318.502
3684-78_3	Macrophage scavenger receptor	0.0456073	0.0324672	0.0968999	0.807522	0.881827	2319.2
5008-51_1	Mn SOD	0.0498142	0.0324879	0.141679	0.345547	0.532157	992.412
5748-20_3	Acid ceramidase	-0.173362	0.0326549	0.126541	0.487453	0.654189	1399.96
4143-74_2	Lymphotactin	0.0106137	0.0327363	0.155547	0.242035	0.426719	695.125
4212-5_3	EP15R	0.0317769	0.032751	0.176668	0.131457	0.298453	377.543
3323-37_1	LRP8	0.0268483	0.032873	0.133974	0.414227	0.595723	1189.66
9790-28_3	BR serine/threonine kinase 2	0.040283	0.0331075	0.0858412	0.904914	0.945403	2598.91
6070-11_3	QSCN6	0.0672427	0.0331669	0.217368	0.0324715	0.124844	93.2582
7911-29_3	SCN4B	0.21415	0.0331895	0.166788	0.176657	0.353507	507.36
8321-27_3	ZN843	-0.0446968	0.0332209	0.148568	0.290893	0.475496	835.446
5714-88_3	IFNA6	0.011408	0.0332399	0.160805	0.209488	0.392209	601.649
2578-67_2	MCP-1	0.00609723	0.0332512	0.159808	0.215389	0.400386	618.597
9073-35_3	FLVC1	0.0243817	0.0332895	0.176396	0.132561	0.300485	380.715
5464-52_3	GRB2 adapter protein	0.0104067	0.0335469	0.131617	0.43675	0.617296	1254.34
2761-49_2	FGF-18	-0.0721965	0.0335611	0.153281	0.257175	0.441487	738.608
5091-28_3	ILT-4	0.0123523	0.0335635	0.116298	0.597032	0.735282	1714.68
9197-4_3	LEG9	0.0498646	0.0337853	0.166425	0.178524	0.355071	512.722
3187-52_2	CRIS3	0.0566584	0.0339473	0.189449	0.0874261	0.228886	251.088
6599-5_3	APCD1	0.0457747	0.0339756	0.156998	0.2327	0.419779	668.315
8998-15_3	HS3S4	-0.0538086	0.0340166	0.273749	0.00290243	0.0303119	8.33578
9887-40_3	RBBP6	0.0474831	0.0340216	0.111947	0.645318	0.771909	1853.35
6245-4_3	Nectin-2	0.128085	0.0341033	0.189811	0.0863842	0.226986	248.095
3057-55_1	WISP-1	-0.0590042	0.0341312	0.110134	0.665509	0.788507	1911.34
7757-5_3	DQA2	0.119426	0.0341425	0.062636	0.995527	0.998215	2859.15
9097-5_3	K1324	-0.229828	0.0341831	0.205493	0.0503126	0.162175	144.498
4547-59_2	FLRT1	0.00352383	0.0342252	0.13488	0.405747	0.587056	1165.31
2876-74_2	Topoisomerase I	0.0438212	0.0342283	0.172136	0.150867	0.325537	433.289
6276-16_3	Furin	0.0250909	0.0342869	0.160442	0.211619	0.394912	607.77
10461-57_3	CLC14	-0.0241808	0.0342919	0.11376	0.625145	0.756602	1795.42
5671-1_3	Chymotrypsin	0.114072	0.0342978	0.0804931	0.940144	0.964664	2700.09
10442-1_3	TM190	-0.213327	0.0343594	0.10116	0.763628	0.855358	2193.14
5020-50_1	phosphoglycerate kinase 1	0.00545582	0.0344261	0.111584	0.649357	0.775126	1864.95
5183-53_3	AMPK a1b1g1	0.184197	0.0344314	0.133339	0.420224	0.600738	1206.88
7693-13_3	TRAIL R2	-0.011312	0.034491	0.122099	0.533977	0.687704	1533.58
5752-63_3	SUSD3	0.0450421	0.0347654	0.215102	0.0353688	0.131564	101.579
4703-87_2	TNF-b	0.0171088	0.0347665	0.200054	0.0609831	0.183013	175.144
6545-58_3	PRIO	0.0764791	0.0348371	0.192531	0.0788975	0.216422	226.594
8905-20_3	KCMB3	-0.0290006	0.0349133	0.125816	0.494922	0.656543	1421.41
6940-18_3	JPH1	0.0412105	0.0349881	0.13905	0.3681	0.553499	1057.18
5352-11_3	HVEM	0.167285	0.0349996	0.148205	0.293608	0.477758	843.243
9955-40_3	RN148	-0.424013	0.0350064	0.209482	0.0435505	0.148196	125.077
3522-57_1	Vasoactive Intestinal Peptide	0.0564859	0.0350264	0.164431	0.189073	0.366655	543.017
3867-49_1	SE6L2	-0.058777	0.0351182	0.147027	0.302556	0.489268	868.941
8386-11_3	PATE	-0.108897	0.0352199	0.116389	0.596032	0.735282	1711.81
9870-17_3	SYWC	0.2057	0.0352583	0.212563	0.0388804	0.138541	111.664
6900-30_3	UB2J1	-0.201741	0.0352652	0.1405	0.355543	0.539133	1021.12
9951-36_3	FBXL4	-0.734343	0.0352733	0.181744	0.112182	0.272807	322.186
6463-59_3	OX26	-0.297018	0.035496	0.107959	0.689679	0.805841	1980.76
3342-76_4	ABL2	-0.0559136	0.0355524	0.10669	0.70371	0.814613	2021.05
9387-13_3	CL049	0.268891	0.0355553	0.21211	0.0395385	0.139846	113.555
6413-79_3	LIPK	-0.116004	0.0356794	0.115845	0.602036	0.739225	1729.05
9221-6_3	IPIL1	0.0727375	0.0356968	0.130983	0.442928	0.620531	1272.09
6650-20_3	Periostin	-0.0346968	0.0357307	0.0772299	0.957201	0.974161	2749.08
2794-60_2	SOD	-0.0421212	0.0357608	0.093818	0.837435	0.904518	2405.11
6497-10_3	XLRS1	0.164381	0.0360519	0.187001	0.0947385	0.244026	272.089
9365-91_3	EYS	-0.0582648	0.0361464	0.134065	0.413374	0.59569	1187.21
5586-66_3	MINP1	0.02787	0.0361991	0.10252	0.749137	0.84506	2151.52
7775-15_3	Kallikrein 11	0.000123111	0.0363156	0.105602	0.715675	0.818892	2055.42
8323-163_3	TFF3	0.921627	0.0363187	0.141679	0.345547	0.532157	992.412
7110-2_3	DJB11	-0.0172745	0.0363519	0.179387	0.12082	0.286063	346.994
8393-121_3	CATF	-0.0228435	0.0363634	0.103336	0.740355	0.840434	2126.3
5102-55_3	MICB	-0.000262837	0.0365619	0.121102	0.544655	0.695531	1564.25
2449-1_4	GV	-0.00774096	0.0365746	0.129623	0.456325	0.631598	1310.57
10895-28_3	TM11B	-0.0891865	0.0365906	0.125906	0.493985	0.656543	1418.73
9532-5_3	WBP1L	-0.521578	0.0365936	0.0974438	0.802068	0.878878	2303.54
9523-34_3	ITM2C	0.236956	0.036662	0.118474	0.573146	0.715996	1646.08
7895-108_3	MRAP	0.0364399	0.0366701	0.199511	0.0621498	0.184395	178.494
5021-13_1	PPase	-0.0115669	0.0367932	0.0949964	0.826209	0.8961	2372.87
8793-13_3	ALKB5	-0.0482106	0.0369115	0.16289	0.197551	0.376239	567.368
8259-25_3	B3GN1	0.154912	0.0370732	0.133249	0.421084	0.601669	1209.35
2870-29_2	RAC1	-0.0818877	0.0371893	0.131617	0.43675	0.617296	1254.34
3055-54_2	IL-4 sR	-0.269583	0.0372294	0.1657	0.182305	0.359849	523.581
7014-27_3	LRC19	-0.00447353	0.0372748	0.181835	0.11186	0.272255	321.261
10522-167_3	PCDB4	-0.0366881	0.0373111	0.134065	0.413374	0.59569	1187.21
2247-20_11	EG-VEGF	0.050561	0.0373809	0.148658	0.290217	0.475202	833.504
10978-39_3	SOM2	0.305159	0.037408	0.110225	0.664499	0.787961	1908.44
10009-2_3	IRF1	0.0344887	0.037484	0.190899	0.0833208	0.220958	239.297
8220-15_3	CJ035	0.173741	0.0375708	0.124728	0.506222	0.664474	1453.87
10624-45_3	ISK13	1.14975	0.037582	0.106236	0.708703	0.815789	2035.39
5605-77_3	MFNG	0.168438	0.0375862	0.118202	0.576118	0.719084	1654.61
4906-35_1	Coagulation Factor V	0.0100901	0.0376428	0.115573	0.605042	0.741016	1737.68
10048-7_3	PEBB	-0.0113511	0.0377394	0.147661	0.297714	0.482798	855.036
6361-49_3	PTPRR	0.00903811	0.0377944	0.162346	0.200613	0.381059	576.162
6371-50_3	ANGL7	0.0125164	0.0378137	0.169235	0.164453	0.34105	472.309
7890-68_3	DPP10	-0.127448	0.0378223	0.17132	0.154594	0.329128	443.993
3739-72_4	gpIIbIIIa	0.0981768	0.0378468	0.147208	0.301167	0.487846	864.952
8798-29_3	GOLM1	-0.567005	0.0379058	0.222806	0.0263531	0.109918	75.6862
3356-50_1	Carbonic anhydrase VII	-0.135998	0.0379988	0.209844	0.0429769	0.147291	123.43
7779-86_3	CHSTB	0.044414	0.0380837	0.180928	0.115112	0.277118	330.602
6410-26_3	INSL4	1.18085	0.0381561	0.135606	0.399038	0.579099	1146.04
10621-26_3	PRR16	0.577486	0.0382244	0.148115	0.29429	0.478325	845.201
9841-197_3	Multifunctional protein ADE2	-0.0381642	0.0382745	0.151015	0.273036	0.457502	784.158
5807-77_3	CD70	-0.469079	0.0383496	0.211748	0.040072	0.140865	115.087
5017-19_1	Peroxiredoxin-5	-0.0110598	0.0385375	0.131073	0.442042	0.620501	1269.55
7822-11_3	HRSL2	0.823425	0.0385617	0.120649	0.549533	0.698964	1578.26
8786-6_3	F171B	-0.0137823	0.0386237	0.152194	0.264685	0.450341	760.176
10557-6_3	TEX29	0.0290526	0.0386707	0.145848	0.311693	0.495946	895.183
3208-2_4	MATN3	0.0059053	0.0388571	0.114394	0.618098	0.751558	1775.18
2580-83_2	Myeloperoxidase	0.0159776	0.0392952	0.0973532	0.80298	0.879199	2306.16
3646-7_4	TEC	0.0431942	0.0393156	0.136149	0.39405	0.575057	1131.71
5268-49_3	MMP-16	-0.0484362	0.0394493	0.169144	0.164893	0.34105	473.572
4771-10_3	ASM3A	-0.0466703	0.0394916	0.0753263	0.965578	0.979562	2773.14
4874-3_1	Angiogenin	0.0787781	0.0395176	0.200054	0.0609831	0.183013	175.144
2706-69_2	Thyroxine-Binding Globulin	0.0576753	0.0395461	0.207306	0.0471339	0.155239	135.369
10037-98_3	SIG12	-0.481675	0.0397014	0.190083	0.0856096	0.225777	245.871
9757-29_3	ENAH	0.0780988	0.0397246	0.162165	0.201642	0.382003	579.116
6899-37_3	PHS2	-0.0920299	0.0397299	0.173405	0.145213	0.317875	417.052
3400-49_2	TBK1	-0.00597342	0.0400535	0.144126	0.325389	0.511504	934.518
6210-100_3	IFNA5	-0.000464292	0.0400539	0.12355	0.518589	0.675765	1489.39
3201-49_2	kallikrein 5	0.049909	0.0400917	0.149746	0.282193	0.468474	810.46
6462-12_3	TIMP-4	0.0391421	0.0402413	0.12074	0.548556	0.69834	1575.45
8450-36_3	PACAP-38	-0.210325	0.0402639	0.149474	0.284184	0.470419	816.177
2939-10_2	Artemin	0.133195	0.0402923	0.193709	0.0758277	0.209603	217.777
3489-9_2	CNTF	0.0154821	0.040305	0.119108	0.566228	0.710754	1626.21
3866-7_2	SBDS	-0.0296864	0.0403568	0.138416	0.373682	0.556359	1073.22
3845-51_2	DLRB1	0.0598644	0.0404744	0.129804	0.454527	0.630324	1305.4
7865-126_3	HRSL3	-0.127585	0.0405501	0.222444	0.0267268	0.110445	76.7593
7203-125_3	RFNG	0.00480139	0.0405545	0.205402	0.0504763	0.16252	144.968
7980-72_3	B3GN2	0.0401129	0.0406406	0.22045	0.0288668	0.115951	82.9053
7875-86_3	PLEK	0.00209657	0.0406938	0.118655	0.571167	0.715391	1640.39
10039-32_3	PNP	-0.203996	0.0407055	0.0883793	0.885221	0.932975	2542.36
4159-130_1	Factor H	0.0437327	0.0408337	0.157814	0.22757	0.412875	653.58
9353-8_3	LIPG	-0.733552	0.0409108	0.207397	0.0469797	0.155239	134.926
9305-89_3	INGR2	-0.00633328	0.0410344	0.146936	0.303252	0.489843	870.94
5615-62_3	F172A	-0.184312	0.0410788	0.172408	0.149641	0.324992	429.768
5224-20_3	CSK21	0.163597	0.0411756	0.111947	0.645318	0.771909	1853.35
3388-58_2	PAK7	0.0637642	0.0411787	0.129623	0.456325	0.631598	1310.57
2982-82_2	Galectin-4	-0.0540667	0.0412514	0.158358	0.224197	0.409081	643.894
3332-57_1	RGM-C	0.0906024	0.0412939	0.160624	0.210551	0.393431	604.704
9474-22_3	ASGR2	-1.75008	0.0413895	0.108049	0.688674	0.805323	1977.87
8800-14_3	TTC17	-0.143387	0.0414291	0.163796	0.192529	0.370357	552.943
5609-92_3	F19A5	-0.364502	0.041523	0.118564	0.572156	0.715694	1643.23
10955-4_3	CLC10	0.0729116	0.0416269	0.118745	0.570178	0.714776	1637.55
8310-6_3	U773	-0.0255762	0.0416587	0.126178	0.491181	0.655821	1410.67
4134-4_2	HB-EGF	-0.0238485	0.0418019	0.116842	0.591039	0.731665	1697.46
8878-48_3	YTDC1	-0.265334	0.0418675	0.166062	0.180407	0.357577	518.129
2734-49_4	NKp44	-0.0246609	0.0418776	0.17984	0.119117	0.284141	342.105
6281-51_3	SIA4B	-0.477846	0.0420418	0.120558	0.550511	0.699897	1581.07
2966-65_2	SCGF-beta	0.015624	0.0421011	0.220178	0.02917	0.116518	83.7762
7156-2_3	FUT10	0.184351	0.0421975	0.204859	0.051468	0.164058	147.816
9994-217_3	ATP4B	0.814431	0.0423198	0.103789	0.73545	0.836851	2112.21
9893-27_3	Ornithine decarboxylase antizyme	-0.210924	0.042427	0.171864	0.152101	0.326972	436.834
10040-63_3	P73L	0.221479	0.042484	0.125997	0.493049	0.656543	1416.04
3902-21_2	SKP1	-0.0146926	0.0425081	0.119471	0.562285	0.707042	1614.88
7821-6_3	C1D	0.346025	0.0426145	0.153644	0.254707	0.439351	731.519
7045-4_3	BNIP3	-0.134668	0.0426531	0.154007	0.252256	0.437753	724.481
8041-5_3	FNDC5	0.0550133	0.042858	0.194616	0.0735357	0.206043	211.195
6431-68_3	PCYOX	-0.00160107	0.0432293	0.0788615	0.9491	0.970387	2725.82
3484-60_2	Angiotensinogen	0.154062	0.0432542	0.121918	0.535912	0.689888	1539.14
8370-102_3	DB119	-0.0900472	0.0432609	0.0792241	0.947184	0.969463	2720.31
3056-11_1	NKG2D	1.1019	0.0432686	0.217549	0.032249	0.124488	92.6192
3479-71_2	TRY3	0.0484275	0.0432841	0.145395	0.315258	0.500233	905.422
9585-80_3	ACAM	0.0200682	0.0433064	0.204587	0.0519702	0.164926	149.258
3864-5_2	RS7	-0.0126881	0.0433659	0.14884	0.288869	0.475161	829.631
6385-63_3	VWA1	0.106099	0.0433926	0.172317	0.150048	0.324992	430.939
4984-83_1	Esterase D	0.0580896	0.043609	0.149746	0.282193	0.468474	810.46
10513-13_3	CSEN	0.797909	0.0437623	0.255257	0.00681176	0.0507557	19.5634
4163-5_2	Histone H2A.z	0.0177486	0.0438768	0.154188	0.251038	0.437753	720.98
4413-3_2	SLPI	0.0544961	0.0439131	0.109681	0.670552	0.792521	1925.83
7810-20_3	C1QTNF5	0.0498313	0.0439641	0.0942712	0.83315	0.901246	2392.81
7192-37_3	CRF2-12	-0.0352031	0.0440078	0.119652	0.560317	0.705494	1609.23
4132-27_2	FST	0.106436	0.044096	0.201958	0.0570464	0.174853	163.837
5825-49_3	IFN-g R1	0.164289	0.0441878	0.135877	0.39654	0.576931	1138.86
10490-3_3	RPN1	0.182771	0.0442653	0.212201	0.0394061	0.139721	113.174
4560-34_2	LCK	0.171536	0.0442985	0.17413	0.14206	0.314327	407.996
7242-14_3	CJ072	0.0827849	0.0443416	0.139594	0.363358	0.549245	1043.56
8275-31_3	PEAR1	-0.00102996	0.0444313	0.137328	0.383375	0.565513	1101.05
7939-1_3	CC055	-0.391779	0.0444673	0.24293	0.0116377	0.0682112	33.4235
8813-160_3	Thioredoxin	0.0141703	0.0445653	0.145033	0.31813	0.503677	913.671
8404-102_3	BolA-like protein 2	-1.68174	0.0445945	0.111403	0.651376	0.775839	1870.75
7262-191_3	CHSTE	-0.238558	0.0446208	0.193709	0.0758277	0.209603	217.777
9016-12_3	NR1H2	-0.00660472	0.0447309	0.102339	0.75108	0.845923	2157.1
9582-93_3	SUSD1	0.110221	0.0447814	0.143673	0.329061	0.515301	945.063
7863-50_3	PGRC1	-0.13041	0.0448115	0.150653	0.27563	0.45997	791.609
6511-17_3	F19A4	-0.0819626	0.0449805	0.191262	0.0823202	0.219317	236.424
3073-51_2	IL-18 BPa	0.169105	0.0450916	0.153553	0.255323	0.440148	733.286
5762-35_3	Sperm-associated antigen 11	-0.7156	0.0451527	0.113397	0.629176	0.759879	1806.99
8389-8_3	CN16B	0.116954	0.0451915	0.229423	0.0202999	0.0935817	58.3014
9090-9_3	SYTL4	-0.392033	0.0452256	0.116751	0.592037	0.732585	1700.33
9310-2_3	CD8B	-0.0449023	0.045329	0.126269	0.490247	0.655794	1407.99
8304-50_3	OPG	0.0475377	0.0454717	0.0952683	0.82358	0.894262	2365.32
8094-20_3	CISD2	-0.0410958	0.0455806	0.137509	0.381749	0.563983	1096.38
5861-78_3	3HAO	0.155163	0.045614	0.10388	0.734467	0.836064	2109.39
10699-52_3	LRP1	-0.0386724	0.045673	0.154278	0.25043	0.437225	719.235
7125-4_3	RIC3	-0.139316	0.0457707	0.138778	0.370486	0.554763	1064.04
9929-16_3	DHB7	-0.192877	0.0457778	0.142041	0.34251	0.530004	983.688
7953-20_3	SLAF1	0.0399517	0.0457786	0.145939	0.310984	0.495641	893.145
6377-54_3	LYZL2	-0.261409	0.0458709	0.15591	0.239676	0.424121	688.349
9969-8_3	S22AG	0.072197	0.0460925	0.165337	0.184219	0.361145	529.078
8106-15_3	SSRA	0.0526325	0.046109	0.136784	0.38828	0.571281	1115.14
3115-64_2	MK01	0.43215	0.0463712	0.199511	0.0621498	0.184395	178.494
8839-4_3	Metaxin-2	0.0665449	0.046452	0.134065	0.413374	0.59569	1187.21
7752-31_3	CLC4D	0.262682	0.0464595	0.12781	0.474512	0.64374	1362.8
9294-45_3	MFAP2	0.0698034	0.0465457	0.140954	0.351676	0.536386	1010.01
9578-263_3	MANS4	0.129476	0.0467488	0.123822	0.515724	0.673866	1481.16
8601-167_3	sLRP1	0.204875	0.0468313	0.142766	0.336488	0.524074	966.393
2809-25_2	ADAMTS-4	0.0770665	0.0468606	0.238307	0.0141295	0.0747329	40.58
6611-8_3	KDEL1	0.150783	0.0468839	0.133339	0.420224	0.600738	1206.88
2970-60_2	AREG	-0.103151	0.0469313	0.106508	0.705708	0.814955	2026.79
7963-36_3	TTMP	1.55942	0.0470574	0.201595	0.057779	0.176533	165.941
5900-11_2	HINT1	-0.0423517	0.0470911	0.125091	0.502442	0.661327	1443.01
8014-359_3	MANEA	-0.0978799	0.047133	0.104061	0.732499	0.834485	2103.74
10085-25_3	STAR	0.121193	0.0472236	0.24574	0.0103243	0.0633575	29.6513
9319-59_3	TMED4	1.34389	0.0475033	0.193709	0.0758277	0.209603	217.777
7189-55_3	CHST3	-0.388017	0.0475746	0.141588	0.34631	0.532157	994.601
4136-40_2	IL-17D	-0.0814304	0.047642	0.156273	0.237333	0.422572	681.622
7825-7_3	ABD12	0.00166728	0.0477148	0.164612	0.188094	0.365745	540.206
4533-76_2	ATS15	-0.00938991	0.0477782	0.148658	0.290217	0.475202	833.504
5735-54_3	C1GLC	0.0159341	0.0479316	0.16289	0.197551	0.376239	567.368
8993-151_3	RIPK2	0.193896	0.0480237	0.241842	0.0121854	0.0699928	34.9964
3390-72_2	PIK3CA/PIK3R1	-0.0257011	0.0480255	0.167603	0.172512	0.349651	495.455
5103-30_3	MO2R1	0.0711029	0.0480733	0.121555	0.539791	0.692399	1550.28
5247-17_4	Cyclophilin A	-0.0367793	0.0481817	0.115664	0.60404	0.741016	1734.8
3420-21_2	Carbonic anhydrase XIII	-0.104098	0.0481938	0.153644	0.254707	0.439351	731.519
6453-70_3	LIRB4	0.0708898	0.0482992	0.121012	0.545629	0.696156	1567.05
7842-52_3	SERF1	-0.0709451	0.048306	0.176215	0.133301	0.30145	382.841
7975-97_3	UNC5A	0.955832	0.0483575	0.14041	0.356319	0.540026	1023.35
6470-19_3	fibulin 1	0.147197	0.0486424	0.151287	0.271102	0.45559	778.604
9306-7_3	DB118	0.0250236	0.0486643	0.169235	0.164453	0.34105	472.309
9212-22_3	CATF	-0.035726	0.0487716	0.115482	0.606045	0.741611	1740.56
3447-64_2	IL-8	-0.24978	0.0489378	0.11376	0.625145	0.756602	1795.42
2468-62_3	MIP-3a	0.0225811	0.0489943	0.181925	0.111539	0.272255	320.339
2619-72_2	GA733-1 protein	-0.000583108	0.049084	0.206309	0.04886	0.15874	140.326
8017-23_3	FXRD1	0.336414	0.0491799	0.21483	0.0357313	0.131564	102.62
3007-7_2	Siglec-9	0.0482207	0.0491976	0.209753	0.0431197	0.147604	123.84
2981-9_3	ESAM	0.00918799	0.0492097	0.148658	0.290217	0.475202	833.504
8032-23_3	MCCD1	-0.0274951	0.0496156	0.103608	0.737414	0.83809	2117.85
5465-32_3	H6ST1	0.0962114	0.0497947	0.212292	0.0392741	0.139425	112.795
7224-11_3	TRAT1	0.759186	0.0498485	0.194434	0.0739893	0.207112	212.497
8794-13_3	DPEP1	-0.18419	0.0498913	0.197426	0.0668005	0.193398	191.851
4811-33_3	ITI heavy chain H4	0.0837799	0.0499141	0.180022	0.118442	0.282765	340.166
3003-29_2	NKp30	0.00285549	0.0499869	0.169326	0.164014	0.34105	471.049
8006-12_3	DJB12	0.0722947	0.0500909	0.158358	0.224197	0.409081	643.894
7802-53_3	NSG1	-0.446665	0.0501998	0.116389	0.596032	0.735282	1711.81
6969-14_3	WFDC5	-0.112274	0.0502525	0.133974	0.414227	0.595723	1189.66
10013-34_3	K0319	-0.0292573	0.0502602	0.209482	0.0435505	0.148196	125.077
8262-20_3	Apo D	0.0684872	0.0502644	0.200236	0.0605984	0.183006	174.039
6231-46_3	STC2	0.174339	0.0503461	0.181835	0.11186	0.272255	321.261
8346-9_3	DPP2	-0.172973	0.0503759	0.207215	0.0472886	0.155392	135.813
10034-16_3	FRK	0.0699758	0.0504756	0.161621	0.204753	0.385102	588.05
2696-87_2	Persephin	0.00405949	0.0504821	0.157814	0.22757	0.412875	653.58
3592-4_3	CAMK1	0.0282496	0.0504989	0.112128	0.643299	0.770136	1847.56
7847-66_3	TKNK	0.230801	0.0506392	0.228064	0.0214316	0.0969315	61.5515
10798-4_3	CLM2	-0.12812	0.0506966	0.127175	0.480961	0.649117	1381.32
3081-70_2	ULBP-1	0.00127971	0.0507464	0.169779	0.161834	0.339181	464.787
6571-75_3	CQ078	-0.96509	0.0508557	0.164703	0.187606	0.365539	538.805
3676-15_3	IGF-II receptor	-0.00209189	0.0508806	0.167422	0.173427	0.350022	498.081
2597-8_3	VEGF	0.0518879	0.0509451	0.169054	0.165333	0.34105	474.838
3072-4_2	IL-13	-0.0362448	0.0511894	0.119471	0.562285	0.707042	1614.88
2714-78_2	EMAP-2	0.0377782	0.0512396	0.218909	0.0306225	0.120312	87.9477
8008-28_3	HRK	0.0355001	0.0512732	0.225526	0.023695	0.102953	68.052
4890-10_1	ACTH	0.0465618	0.0512934	0.178299	0.124987	0.290422	358.962
5068-54_3	CRTAM	0.608089	0.0513323	0.245558	0.0104048	0.0635798	29.8825
3474-19_2	Thrombospondin-1	0.11508	0.0514371	0.238035	0.01429	0.0753046	41.041
5098-79_3	KLRF1	0.0767618	0.0517903	0.202139	0.0566831	0.174111	162.794
5238-26_3	PPIE	-0.0865751	0.0519504	0.16289	0.197551	0.376239	567.368
4322-28_3	AMNLS	0.324512	0.0520329	0.194706	0.0733098	0.205611	210.546
4464-10_2	Sialoadhesin	0.0667291	0.0520925	0.187727	0.0925204	0.239171	265.719
8767-44_3	Endothelin-converting enzyme 1	0.289584	0.0521143	0.15165	0.2685	0.453606	771.131
10880-38_3	F163B	0.0728033	0.0521388	0.247825	0.00943813	0.0597056	27.1063
5613-75_3	NTAL	0.132828	0.0521685	0.245921	0.0102443	0.0630015	29.4217
2773-50_2	IL-10	-0.0992298	0.0522804	0.173949	0.142843	0.315088	410.245
8872-1_3	SC61G	-0.0492841	0.0523756	0.158901	0.220863	0.406874	634.317
2764-20_2	FGF9	0.0575096	0.0524272	0.218002	0.0316986	0.123025	91.0383
4829-43_6	STRATIFIN	0.0617446	0.0525397	0.125272	0.500557	0.660056	1437.6
2906-55_3	IL-4	-0.0784927	0.0525703	0.22752	0.0218997	0.0981217	62.896
5639-49_3	NETO1	-0.0431385	0.0528082	0.17132	0.154594	0.329128	443.993
8093-13_3	K1161	0.669934	0.0529584	0.133339	0.420224	0.600738	1206.88
6064-4_3	TXNDC4	0.0292698	0.0532303	0.161621	0.204753	0.385102	588.05
2441-2_4	FGF-10	-0.0759483	0.0534581	0.187364	0.093624	0.241589	268.888
8768-4_3	Bcl-10	-0.0739853	0.053556	0.162708	0.198568	0.377674	570.288
5005-4_1	MK12	-0.0309246	0.0535806	0.252901	0.00756168	0.0532283	21.7171
7115-5_3	Semenogelin	0.0979859	0.0536284	0.141316	0.348603	0.533682	1001.19
8261-51_3	STOM	-0.0725329	0.0538205	0.182379	0.109945	0.270344	315.762
3828-54_2	PDGF-CC	-0.136185	0.0538474	0.102157	0.75302	0.846448	2162.67
8044-90_3	XG	0.169566	0.0539652	0.227973	0.021509	0.0969761	61.7738
9838-4_3	SMAD1	-0.0628174	0.0539996	0.167422	0.173427	0.350022	498.081
8003-57_3	LGI3	0.0585291	0.0541266	0.146936	0.303252	0.489843	870.94
7141-21_3	MGT4B	0.00769395	0.0544624	0.22471	0.0244663	0.104409	70.2672
4562-1_2	NXPH1	0.0522621	0.0544989	0.221537	0.0276815	0.113088	79.5012
8383-20_3	CK094	0.1135	0.054552	0.211204	0.0408839	0.143019	117.419
5637-81_3	NTNG1	0.089502	0.0546014	0.177212	0.12927	0.294888	371.264
6247-9_3	SIRB1	0.152744	0.0546817	0.127991	0.472677	0.642465	1357.53
6593-5_3	GALT3	0.069977	0.0547622	0.21773	0.0320278	0.123801	91.984
5936-53_3	TNF-a	-0.0185201	0.054806	0.195975	0.070208	0.199246	201.637
4389-2_1	DHH	-0.0146685	0.0548274	0.173767	0.143629	0.316337	412.504
7981-230_3	B3GT6	0.0555807	0.0548355	0.145848	0.311693	0.495946	895.183
8085-10_3	FCRL2	-0.55229	0.0551449	0.0914612	0.859004	0.918489	2467.06
5934-1_3	Ferritin	-0.0360529	0.0553873	0.0778644	0.954152	0.973094	2740.33
5031-10_1	SPTA2	0.0710266	0.0554264	0.177756	0.127114	0.292525	365.071
6399-52_3	D107A	0.00420166	0.0555173	0.189721	0.0866437	0.227252	248.841
3643-90_2	SLIK1	0.0585097	0.0555183	0.169235	0.164453	0.34105	472.309
6467-65_3	KTEL1	-0.201956	0.0555334	0.136784	0.38828	0.571281	1115.14
6424-2_3	RNS13	0.227192	0.0556301	0.191262	0.0823202	0.219317	236.424
3374-49_2	HCK	0.0379095	0.0556978	0.180928	0.115112	0.277118	330.602
6512-68_3	KREM1	0.0462582	0.0557813	0.116389	0.596032	0.735282	1711.81
3681-87_3	kallikrein 14	0.0280328	0.0557896	0.0830312	0.924527	0.956079	2655.24
3025-50_1	bFGF	1.8122	0.0558813	0.163706	0.193027	0.37057	554.373
5130-67_3	SREC-II	0.109903	0.0558942	0.174311	0.14128	0.313568	405.757
7153-66_3	NGRN	0.678461	0.0560143	0.179569	0.120136	0.285859	345.032
3078-1_2	PlGF	-0.261238	0.0561127	0.197244	0.0672186	0.193633	193.052
5664-57_3	D106A	0.451294	0.0562729	0.133883	0.41508	0.596652	1192.11
5602-62_3	RNS10	0.0411214	0.0563387	0.21773	0.0320278	0.123801	91.984
4284-18_3	RBM39	0.163883	0.056378	0.120196	0.554427	0.70054	1592.31
4156-74_1	TGF-b2	0.0954428	0.0564698	0.192078	0.0801058	0.217657	230.064
3195-50_2	Granulysin	0.0391537	0.0565152	0.141951	0.343268	0.53032	985.864
3321-2_2	IL24	0.12962	0.0566319	0.197154	0.0674284	0.193654	193.654
5679-16_3	HBD-3	0.0129026	0.0567962	0.195794	0.0706442	0.200089	202.89
7882-31_3	SLAF7	0.104962	0.0568621	0.136059	0.394879	0.575682	1134.09
9313-27_3	CBLN1	0.0969405	0.0569767	0.112582	0.638253	0.76537	1833.06
2839-2_1	OX40 Ligand	-0.0462092	0.0570184	0.220268	0.0290686	0.116274	83.485
9226-6_3	TMUB2	-0.115527	0.0571768	0.229967	0.0198624	0.0918596	57.0448
3445-53_2	IL-15 Ra	-0.0195244	0.0574068	0.170232	0.159677	0.335965	458.592
5584-21_3	Holo-TC II	0.0753695	0.0574109	0.183738	0.105276	0.261551	302.353
5721-1_3	CD226	0.0257108	0.0574884	0.152919	0.259661	0.443897	745.747
8336-267_3	GRM1C	-0.00333347	0.0576748	0.25707	0.00628176	0.0482385	18.0412
7117-21_3	SPI2	0.574892	0.0578547	0.220993	0.0282686	0.11451	81.1875
3761-4_2	COX-2	-0.0830474	0.0578636	0.132433	0.428877	0.608865	1231.73
5252-33_3	PDE11	0.0613	0.0579408	0.133611	0.417647	0.599442	1199.48
3029-52_2	DC-SIGN	0.278741	0.0580978	0.222897	0.0262604	0.109782	75.42
4452-9_2	LRRT1	0.224861	0.058325	0.168963	0.165775	0.34105	476.106
3889-64_2	Lamin-B1	0.0338285	0.0585214	0.243927	0.0111553	0.0668852	32.038
10078-5_3	BAG3	1.81814	0.0585352	0.190899	0.0833208	0.220958	239.297
3852-19_2	HSP 40	0.200413	0.0585616	0.218183	0.0314807	0.123025	90.4127
4594-22_2	PACAP-38	0.0939947	0.058574	0.204224	0.0526464	0.165608	151.2
9386-42_3	TTC9B	-0.029726	0.0585881	0.263234	0.00474912	0.0412069	13.6395
6947-4_3	SIA10	0.0302709	0.0586531	0.114394	0.618098	0.751558	1775.18
4564-2_2	PLXC1	0.0364426	0.0586609	0.21202	0.0396713	0.140143	113.936
6290-3_3	UTS2B	0.953925	0.0586672	0.158448	0.223639	0.409081	642.291
7148-42_3	F173A	0.223927	0.0586847	0.149021	0.287525	0.473764	825.771
8843-34_3	MRF	-0.830643	0.0587033	0.170776	0.157119	0.332042	451.246
4553-65_3	HDGR2	0.156675	0.0587135	0.225888	0.0233592	0.102112	67.0876
9445-44_3	CS018	-0.021239	0.058793	0.167966	0.170695	0.347438	490.236
7267-2_3	LCB2	0.0645541	0.0588503	0.172679	0.148423	0.323176	426.269
5743-82_3	CART	0.0740523	0.0589077	0.209844	0.0429769	0.147291	123.43
8825-4_3	PILRA	0.0362792	0.0589536	0.165518	0.18326	0.360743	526.324
6238-55_3	PSG8	0.93362	0.0591378	0.126904	0.483738	0.651946	1389.3
11096-57_3	HEMK2	0.108002	0.059326	0.173586	0.14442	0.317105	414.773
7835-2_3	BNI3L	0.873593	0.0594756	0.156998	0.2327	0.419779	668.315
4557-61_2	KIRR3	0.0567132	0.0594757	0.251088	0.00818887	0.0559962	23.5184
3414-40_2	BMX	0.0920169	0.0595822	0.282632	0.00188611	0.0238631	5.41692
4912-17_1	GOT1	0.0624111	0.0596226	0.249184	0.00889798	0.0582119	25.555
5486-73_3	sICAM-2	0.0499457	0.0597062	0.18827	0.0908855	0.23622	261.023
5019-16_2	PGP9.5	0.016468	0.0597286	0.211748	0.040072	0.140865	115.087
6543-182_3	PRRP	0.676179	0.0597374	0.156545	0.235588	0.421826	676.609
4774-62_3	FAM107B	-0.214554	0.0598285	0.165337	0.184219	0.361145	529.078
3822-54_2	MAPKAPK3	0.177294	0.059902	0.123006	0.524338	0.679251	1505.9
5677-15_3	CB066	0.0410685	0.059937	0.161711	0.204232	0.385102	586.554
9368-64_3	LRTM1	-0.00664481	0.0600429	0.191624	0.0813297	0.218298	233.579
5618-50_3	FAM3B	-0.0129742	0.0601703	0.156363	0.236751	0.422572	679.948
5080-131_3	GPNMB	-0.0262077	0.0602995	0.146211	0.308862	0.492806	887.051
5230-99_3	HMGR	-0.0986336	0.060361	0.168872	0.166218	0.341471	477.377
8092-29_3	IL-6 sRa	0.0596461	0.0603899	0.154641	0.24801	0.435115	712.284
7211-2_3	RNase 1	0.0153264	0.0603975	0.0910986	0.862211	0.920371	2476.27
4355-13_1	DAPK2	0.257103	0.0604226	0.192078	0.0801058	0.217657	230.064
9049-2_3	MOT4	-0.0526691	0.0604587	0.178299	0.124987	0.290422	358.962
7916-10_3	S100A7	-0.543237	0.0605415	0.194072	0.0749038	0.208453	215.124
2501-51_3	Cadherin E	0.0362016	0.0605883	0.166244	0.179464	0.356445	515.42
6219-14_3	PDZ11	-0.0753662	0.0606721	0.170957	0.156274	0.331231	448.818
9099-19_3	SYT5	0.41239	0.0606891	0.123822	0.515724	0.673866	1481.16
5340-24_3	Caspase-10	0.0960409	0.0607391	0.208575	0.0450138	0.151204	129.28
10977-55_3	UCMA	-0.102841	0.0608539	0.105602	0.715675	0.818892	2055.42
6510-56_3	RN128	-0.135581	0.0608757	0.162527	0.199589	0.379364	573.219
2695-25_1	PECAM-1	0.00840144	0.0609463	0.187727	0.0925204	0.239171	265.719
7880-9_3	PSA1	0.33159	0.0610376	0.150562	0.276281	0.460789	793.479
7628-40_3	CREL1	0.107675	0.0611732	0.158629	0.222525	0.408627	639.092
4383-97_1	Activin AB	0.0976855	0.0611755	0.189811	0.0863842	0.226986	248.095
7768-10_3	CBPM	0.0382406	0.0612806	0.141588	0.34631	0.532157	994.601
8480-29_3	FBLN3	0.0884626	0.0613688	0.179115	0.121851	0.287319	349.955
6496-60_3	DLK1	0.407859	0.0615161	0.123459	0.519545	0.676705	1492.13
4920-10_1	Lysozyme	0.0359959	0.0615336	0.170957	0.156274	0.331231	448.818
5076-53_2	EPHAA	0.0693606	0.061816	0.12926	0.459933	0.634452	1320.93
8687-26_3	T106B	0.205535	0.0618333	0.191715	0.0810837	0.218298	232.872
9187-2_3	HMGN1	0.0787286	0.0618805	0.136421	0.391571	0.573771	1124.59
5097-14_3	KI3S1	-0.00156894	0.061978	0.182197	0.11058	0.27121	317.586
9565-6_3	PAWR	-0.079504	0.0621385	0.134699	0.407435	0.588904	1170.15
3657-74_3	Calcineurin B a	0.0588746	0.0623166	0.146574	0.306048	0.491044	878.97
5125-6_3	SIG14	0.0652331	0.0624727	0.122915	0.525299	0.679882	1508.66
9216-100_3	PLXB2	0.153713	0.0624796	0.178934	0.122542	0.288239	351.94
5764-4_3	GALT2	0.0879422	0.0625057	0.183376	0.106505	0.263464	305.882
5128-53_3	SLAF6	0.105396	0.0625973	0.18392	0.104666	0.261166	300.602
7228-2_3	SIA7F	0.0494922	0.0630349	0.211022	0.0411578	0.143453	118.205
3422-4_2	CDK1/cyclin B	0.0105832	0.0631471	0.191262	0.0823202	0.219317	236.424
10346-5_3	STAT3	-0.00222222	0.0631858	0.14893	0.288196	0.474327	827.7
6042-52_3	OFUT2	0.0877315	0.0633946	0.165337	0.184219	0.361145	529.078
9054-8_3	F174B	0.0111182	0.0634782	0.243474	0.0113723	0.0679027	32.6612
5583-62_3	RYK	0.719871	0.0635675	0.172136	0.150867	0.325537	433.289
8479-4_3	MMP-10	0.00122286	0.0635788	0.0823967	0.928621	0.957974	2667
7161-25_3	G6PE	0.116678	0.0638668	0.184554	0.102555	0.258366	294.537
4254-6_2	NUDC3	-0.00686287	0.0639023	0.227792	0.0216645	0.0973717	62.2205
9175-48_3	DSCAM	0.0331282	0.0639463	0.19244	0.0791379	0.216667	227.284
9027-10_3	NLGN2	-0.0793212	0.0640658	0.242748	0.0117274	0.068597	33.6811
7995-16_3	VWC2L	-0.0547916	0.0641554	0.198785	0.063735	0.187548	183.047
3189-61_2	Enterokinase	0.0471414	0.0641599	0.185823	0.0984375	0.25041	282.712
8244-16_3	FUT8	9.33604e-05	0.0643273	0.138053	0.376896	0.558826	1082.45
6256-9_3	LY66C	0.106071	0.0643284	0.156454	0.236169	0.422339	678.277
9544-24_3	CG069	0.401974	0.0644408	0.1531	0.258416	0.442823	742.171
3809-1_2	FGFR-3	-0.0176154	0.064506	0.281091	0.00203455	0.0249711	5.84323
9185-15_3	TFF1	0.113679	0.0645318	0.10252	0.749137	0.84506	2151.52
8051-10_3	AGGF1	-0.0605748	0.0645905	0.152194	0.264685	0.450341	760.176
8045-3_3	KI3L3	-0.3725	0.0646231	0.205131	0.0509701	0.163361	146.386
3222-11_2	Semaphorin 3A	-0.165768	0.0647404	0.155004	0.245607	0.431691	705.383
5016-61_2	PARK7	-0.0623447	0.065059	0.176215	0.133301	0.30145	382.841
7872-5_3	NUDT8	0.121516	0.0650964	0.184917	0.101364	0.255815	291.117
7928-183_3	TPST1	0.0437103	0.0650965	0.126541	0.487453	0.654189	1399.96
3132-1_1	VEGF-C	0.0592802	0.0651358	0.264775	0.00442381	0.0390609	12.7052
5651-50_3	PSG7	0.502261	0.0651527	0.174311	0.14128	0.313568	405.757
9302-90_3	G45IP	0.0196364	0.0651973	0.186004	0.0978607	0.249827	281.056
5587-3_3	CC134	0.0086023	0.065201	0.172317	0.150048	0.324992	430.939
6378-2_3	CEI	0.119224	0.0652652	0.142223	0.340998	0.52909	979.345
6895-1_3	TR	0.246655	0.0652903	0.153735	0.254093	0.439351	729.755
6493-9_3	CBPZ	0.369052	0.0654536	0.161802	0.203712	0.384655	585.06
9202-309_3	ATPO	0.132652	0.0656826	0.0916425	0.85739	0.917445	2462.42
7860-9_3	HERC4	0.299783	0.0658982	0.181291	0.113802	0.275814	326.839
5353-89_2	IL-1Ra	-0.0151507	0.0659083	0.158358	0.224197	0.409081	643.894
7123-25_3	RM52	0.0788908	0.0659179	0.18546	0.0995995	0.252918	286.05
8992-1_3	TMEM2	0.208608	0.0662808	0.170595	0.157968	0.333346	453.684
9482-110_3	NUDT9	0.0152712	0.0663588	0.13769	0.380127	0.561876	1091.72
9373-405_3	APOO	0.163195	0.0663721	0.168691	0.167106	0.34256	479.927
10710-23_3	ZPBP2	-0.166557	0.0664444	0.157814	0.22757	0.412875	653.58
4487-1_1	FGF7	0.08677	0.0665189	0.233049	0.0175382	0.0855174	50.3697
7092-7_3	PDILT	0.2188	0.0665418	0.183738	0.105276	0.261551	302.353
9995-6_3	DUT	-0.0796484	0.0666432	0.146574	0.306048	0.491044	878.97
5798-3_3	BID	-0.0838261	0.0666679	0.191806	0.0808383	0.218298	232.168
3152-57_1	TNF sR-II	0.0651718	0.0666999	0.177756	0.127114	0.292525	365.071
5957-30_3	Somatostatin-28	0.106673	0.0667386	0.285624	0.00162625	0.0218252	4.67059
8840-61_3	C1s	0.113849	0.0667715	0.15591	0.239676	0.424121	688.349
8035-6_3	CA198	0.439056	0.0668177	0.17141	0.154176	0.329128	442.793
5100-53_3	LIMP II	-0.0234823	0.0668806	0.202683	0.0556052	0.172274	159.698
7993-23_3	ASTL	0.824366	0.0668895	0.22471	0.0244663	0.104409	70.2672
8762-38_3	CD70	0.903702	0.0670193	0.242386	0.0119087	0.0689552	34.2018
3737-6_3	Cathepsin H	0.0710252	0.0670906	0.227339	0.0220578	0.098217	63.3499
6039-24_3	CRHBP	-0.0280572	0.0671553	0.13769	0.380127	0.561876	1091.72
4138-25_2	IL-20	0.267064	0.0672035	0.20785	0.0462149	0.153978	132.729
6054-6_3	NXPH3	0.086597	0.0672725	0.17703	0.129996	0.296308	373.348
7002-1_3	MXRA8	-0.18888	0.0674597	0.151831	0.267224	0.452516	767.466
9035-2_3	MXI1	-0.0868052	0.0675405	0.148024	0.294973	0.479164	847.161
9941-70_3	PCDB1	0.0135313	0.0675553	0.24293	0.0116377	0.0682112	33.4235
8273-84_3	IL31R	3.00661	0.0675647	0.206672	0.0482261	0.157392	138.505
8004-15_3	G3PT	0.699559	0.0676325	0.159355	0.218113	0.403101	626.419
5099-14_3	LAG-3	0.0715604	0.0676651	0.156363	0.236751	0.422572	679.948
2833-20_1	Kallikrein 4	0.149115	0.0677283	0.186548	0.0961472	0.246549	276.135
7873-32_3	TSSK2	0.258821	0.0677696	0.157995	0.226441	0.411868	650.34
2190-55_1	Coagulation Factor XI	0.0706104	0.0677961	0.165337	0.184219	0.361145	529.078
9279-7_3	IGS11	0.0585627	0.0678898	0.163071	0.196539	0.375555	564.46
6414-8_3	OAF	0.14513	0.0680751	0.199782	0.0615641	0.183988	176.812
9963-19_3	PCDBA	0.0512399	0.068085	0.198241	0.0649464	0.189945	186.526
[truncated: 874 more rows]
