# Supplementary material for: Discovery and validation of a prognostic proteomic signature for tuberculosis progression: A prospective cohort study
Source: PLoS Med. 2019 Apr 16;16(4):e1002781. doi: 10.1371/journal.pmed.1002781 (PMC6467365; doi:10.1371/journal.pmed.1002781)
Supplement: S6 Table — GC6–74, Grand Challenges 6–74. (XLSX) [file pmed.1002781.s012.xlsx]

## Sheet: S6_Data. GC6 protein abundance
S6 Data. Raw abundances of 150 proteins measured in the GC6-74 Gambian validation cohort.
ProteinID	GC-4974	GC-3585	GC-2829	GC-3300	GC-3193	GC-2358	GC-0453	GC-1290	GC-4387	GC-2409	GC-2225	GC-1182	GC-4059	GC-2549	GC-3365	GC-4190	GC-0784	GC-0551	GC-2674	GC-2782	GC-2346	GC-1579	GC-1178	GC-3551	GC-1744	GC-1135	GC-0955	GC-2107	GC-0434	GC-1464	GC-0609	GC-0385	GC-5392	GC-3742	GC-1832	GC-3149	GC-2050	GC-4347	GC-4372	GC-2066	GC-2992	GC-1871	GC-1996	GC-2800	GC-0965	GC-0386	GC-0116	GC-3421	GC-2778
10013-34_3	319.8	221.6	350	319.8	299.4	324.2	330	511.3	379.7	527.7	312.2	337.7	302.7	247.2	340.6	276.4	315.9	315.2	308.9	342.1	321.7	470.9	326.7	237.6	219.4	379.3	302.2	435.5	367.9	2529.7	462.5	370.9	238.9	309.5	286.5	260.3	425.4	317.4	330.6	328.7	356.1	308.8	412.4	2154.4	369.1	452.1	560.1	329.9	300.2
10041-3_3	521.4	485.6	606.3	660.6	599.9	688.8	441.8	519.2	623.4	726.4	844.3	667	663.3	550.7	448.2	479.5	527	584	672.6	584.2	747.6	647.3	412.7	557.7	943	627.2	543.5	587.8	470.1	476.7	504.2	511.3	453.4	522.1	816.9	621.4	541	738	676	532.2	819.8	799.4	572.9	2625.7	479.8	575.7	409.3	525.3	614
10339-48_3	16027.2	47003	22737.5	25815.5	27926.5	18801.2	20904.3	18552.1	17810.1	18097.4	35838.3	20928.7	36425.1	39677.1	54482.9	28131.9	18792.8	18788	29620.9	16964.3	24601.6	12994.2	52895.6	23484.9	39905.3	24933.4	22890.5	19583.9	15813.3	14888.6	23517.7	19850.9	48580.6	17410.3	22686	42693	28091.9	27503.9	19336.4	22417.4	45189.7	37100.8	16562.6	5849	28264	9813.2	7150	19064.8	18655.8
10346-5_3	7919.5	49432.8	5602.9	4177	4172.2	6886.3	4991	3891.5	5044.4	4552.1	3420.5	4626.4	11249.6	11059	4015.6	10722.8	5249.4	5642.5	7953.3	4491.6	8213.5	2552.5	7922.9	4231.1	13908.1	6963.8	9878.5	8316.4	5472.2	3726.2	3468.6	3459.7	47311.9	4436.9	4866.3	7718.7	4916.9	7149.7	4375.5	14832.8	6593.5	4939.7	4655.3	2089.1	4052.4	3649.6	2172.6	4260.5	3658.9
10370-21_3	1221.6	4463.3	894.4	920.7	799.8	827.8	1066.4	896.8	974.7	1050.2	583.4	790.9	1482.5	1639.6	943.5	1992.1	1340.6	887.7	1459.2	921	1153.4	556.9	1258.7	1147.6	2253.3	1087.2	1851	1806.1	1001.5	802.6	532.7	815.7	7666.8	791.6	832.6	1137.9	872.2	980.5	689.3	2242.6	1011.2	1406.5	1604.5	363.5	773.3	1095.6	550.3	845.3	653.2
10427-2_3	539.5	363	340.5	499.6	349.4	347.2	449.7	285.4	4555.2	5405	529.4	532.2	467.8	454.8	386.6	500.9	563.1	546.6	694.3	764.5	547.8	468.4	371.1	523.4	431.6	373.5	719.7	741.6	611.3	418.8	500.1	481.4	345.7	860.3	554.9	753.6	486.6	489.4	596.7	422.4	392.1	512.7	728.1	2252	367.5	1066.1	311.9	657.1	553.5
10428-1_3	2635.6	2031.9	2721.8	1612.1	2252.2	2316.4	2266.2	2288.1	2633.5	2426.5	2693.1	2500.6	2280.3	2389.4	2312.9	2175	2395.8	2533.2	2221.9	2112.1	2027.6	2832.7	2199.4	2500.4	2124.2	2285.6	2433.1	2186.6	2349.2	2183.7	2792.6	2348.6	1544.5	2036.9	2545.9	2173.7	2116.1	2485.4	3140.9	2161.5	2503.9	2892.2	3076.3	1984.7	2373.7	2608.2	2491.7	2461.4	2693.9
10639-1_3	3038.7	1499.4	1773.9	3197	2828.9	2184.1	3489.1	2149.9	2334.8	3209.7	4540.7	2207.9	1521.6	1789.4	1721.5	10055.8	4593.8	2182	1786.7	3031.4	2481.1	2216.9	1819.9	7003.9	3666	1655.8	1809.3	2474.6	2572.4	1839.5	2140.5	1645.2	1289.6	4226.6	2282.4	2361.6	2635.5	3344.6	2224	1285.2	2080.3	3529	3868.5	1291.4	1419.1	3382.8	1107.4	3813.5	2318.6
11510-51_3	1396.1	1868.4	874.4	1842.3	1803.2	1197.2	1351.7	1834.3	1970.5	785.2	3135.6	608	3396.2	2608.7	2355.9	2463.6	1785.8	1857.3	1937	1811.4	6099.8	2948.7	1858.1	1495.5	2257.5	1100.1	1666.8	1163.8	1061.4	1950	1808.4	1873.8	1444.4	1686.2	2679.9	3207.5	1443.2	1878.6	1972.7	921	3620.9	2782.9	1225.6	1284.1	2641	1508.1	1926.2	1462.3	3747.3
2278-61_4	28907.9	16643.4	43521.6	32881.1	31752.4	37046.5	26124.6	28962.4	35553.4	35054.5	21426	38804.5	27757.9	43909.7	54583.4	24773	17568.6	25230.1	31440.3	30986.8	28498.2	34544.1	44669.2	24626.8	30575.5	32966.9	34944.8	19710.7	24811.2	37580.7	41431.3	30026.3	18287.1	53125	38612.2	38639.4	36625	20486	42033.3	42669.3	32856.1	26043.9	23561	27463.5	27266	22583.6	24575.9	23714.8	30596
2292-17_4	43497.7	83526.1	38030.3	66270.8	32881.2	23886	24156.5	60844	53976.7	37422.9	37309.8	19320	53774.1	31523.7	23678.5	51934.4	107183.6	57014.7	44021.4	49934.6	34317.1	58197	19966.8	67674.4	68421.5	32224	46668.9	97720.6	22438.2	23068.3	30537.5	59730	48185.8	5054.8	29377.1	51003.7	59961.3	24485.6	58085	53454.8	68646.1	77865.4	62191.2	51670.2	58842.9	79567.9	51573.1	44085.9	38366.6
2381-52_4	1892.1	1778.6	1459.4	2232.2	1293.8	1291.9	1740.4	1222.9	1374.1	1230.8	1896.2	1443.9	2111.5	1134.6	1610.4	2037.4	2937	1830.1	1637.2	1394.5	1937.6	1965.1	1438.2	1376.8	1725.7	1434.6	1488.4	2036.5	1494.7	1685.9	1272.1	1640.2	1681.4	2215.1	1111.7	1953.9	2118.9	1631.5	1725.2	1504.6	2601.4	2044.5	1597.6	2215.6	2044.7	2030.7	1797.9	1727.3	1624.5
2436-49_4	4076.7	3124	2982.3	3243.9	3802.8	3113.8	2382.6	2377.8	4291.3	3338.6	2244.7	3275.3	3015.7	2814.8	4223.4	2971.1	2528.4	3443.6	2649.4	2948.8	2437.3	2815.5	4738.5	4879.5	2564	2275	4325.4	2107.2	2855.6	2964.2	4048.9	4410.4	3252.7	3920.7	2529.4	3189.6	3837.9	3895.5	3325.6	2055.9	2719.7	3136.9	3048.4	2762.7	3590.3	3199.8	3699.6	2705.4	2951
2474-54_5	11945.1	12410.1	13113.1	11451.4	9928	7179	13536.4	9471.2	11185	7232.4	18644	7898.8	10718.5	7424	7579.4	8771.5	13047.6	15271.9	9349.8	11373.1	11701.9	14235.9	7970.7	8723.7	9360.9	10454.1	11541.7	16477.2	8014.3	7564.5	9514	10441.1	15473.2	8240.2	8436.6	10340.2	17855.1	11410.5	10885.8	11712	11437.7	8669.3	10551.2	8962.6	16798.4	14352.9	13235.1	8082.9	10977.3
2567-5_6	14132	17825.8	13680.4	13441.5	10439.7	12523.6	13319.4	13235.3	14712.6	13209.7	12709	8769.6	9019.7	14041.2	10952.7	11913.4	21286.4	16153.6	12696.1	14154.5	14962.5	13411.8	10247.3	11259.7	15444	13572.4	12246.4	18666.5	10235.7	9830.9	13067.7	11353	14480.1	10934.1	14465.7	12229.5	14375.2	5576.1	9542.2	11547.1	9756.9	14396.3	15047.1	14009	13145.5	13004.2	11578.2	17077.2	11720.3
2570-72_5	7397.8	6473.8	9505.3	6927.9	11320.4	4238.6	11717.5	6950	5867.4	48467.2	2468.2	12786.1	4284.5	13892.7	14248.7	22898.5	7775.9	8019.1	5039.8	4960.6	9909.7	11969.8	13648.6	51668.4	9508.5	10875.4	12561.3	10972.3	10112.3	5557	8058.9	4185.5	23579.9	13914	22571	12033	7040.8	7157.6	6978.3	9713.2	16981.5	36140.9	11498.2	7136.9	4520.6	18830	9217.3	8330.6	14947.2
2609-59_2	689.4	538.2	723.6	791.7	860	651.4	836.8	676.1	776.6	868	567.3	778.8	676.7	683.1	849.6	808.2	583.3	628.3	626.2	777.9	625	732.8	833.1	1853.7	565.9	805.7	910.2	657.3	743.3	746.2	660	698	671.7	903.7	739.8	930.4	903.5	680.7	757.5	708.3	573.7	609.2	603.2	551.6	595.7	982.4	689.7	732.2	719.1
2615-60_2	411.5	347.6	517.1	322.9	358.3	329.5	408.5	368.6	499.3	320.4	563.3	377	393.5	306.3	360	335.6	413.5	525.9	384.2	420.3	370.8	552.4	386.7	325	320.6	416.8	417.5	446.8	320.2	313.8	454.3	404	347.6	281.6	326.5	386	409.1	432.1	431.9	393	398.6	381.4	414.1	316.7	620.1	417.7	437.6	274.2	464.4
2625-53_4	3576.7	18108.5	2973.9	1626.8	1698.4	4140.3	1664.6	2388.7	3083.9	2503.7	1801.7	2192.8	4196.2	7030.4	2307.2	4704.1	3031.2	2024.6	3891.9	2600.8	3766.8	1581.5	3098.3	6501.5	8514.3	3006	4941.2	3256.3	2955.5	1918.5	2042.6	2086.5	66861.5	1895.2	2774.3	3556	2908.6	1789.4	2503.3	5188.1	2333.1	2438	2810.2	1442.9	2672.1	1553.6	2038.7	1933.5	1979.7
2630-12_2	14620.2	5531.5	11755.5	7804.4	8576.7	13501.7	11753.6	9243.6	6586	9837.8	9461.5	12341.6	8673.8	14221.6	12225.6	10899.9	4481.5	10239.1	11368.9	9321.1	6917.8	20534.5	12071.3	4646.8	3876.4	9890.1	9888.2	5637.9	9427	11254	13274.2	12147.2	5236	12158.5	12545.7	8911.7	6912.3	7211.6	16469.5	9670.6	9605.6	9347.8	9659.9	13667.3	7700.9	7056	9742.9	6093.2	9609.1
2644-11_2	1739.7	3538.6	1505.8	855.9	1006.3	2046.1	1200.9	1109.9	1345.1	1288.5	1204	1326.2	1636.3	2947.7	1357.4	1781.2	1176.2	1338.2	1578.6	1233.8	1391.6	2075.9	1639.2	919.5	2327	1733.6	1691.3	1094.9	1300.4	1361.2	1625.6	1474.1	1864.3	1266.7	1536.8	1388.7	958.9	1363.3	1821.2	2117.3	1320.6	1259	1137	1457.9	1149	824	2082.8	868.6	1123.8
2658-27_1	2807.3	2977.6	3228	2670.1	3463.2	3074.7	3619.7	2388.6	2494.5	3542.5	3556.8	3509.7	3835	2901.7	4078.9	3134.6	2457.3	3341.5	4230.5	2991.1	3783.8	3963.1	3530.2	1594.4	3784	3247.8	3506.2	2320.3	3349.6	2916.7	2343.9	2608.1	6008.5	4152	2923.9	3903.1	3215.7	8008.1	3250	3277.6	2870	2128	2402.5	1580.3	4617.8	2319.2	1478.3	2938.6	4414.2
2670-67_4	789.7	1107	688.6	618.3	550.1	678.2	601.2	557.3	747.8	633.9	857.3	649.7	951.9	1097.3	766.1	904.1	944.8	812.5	676.2	633.7	834.1	791	655.8	682.7	1150	739.9	760.2	809.3	724.6	731.4	576.1	602.9	966.5	680	711.1	719.2	821.1	649.7	668	831.7	805.5	693.3	677.1	1120	615.6	620.1	639.8	828.3	546.5
2692-74_2	11161.5	3623.1	617.2	1430.4	527.2	1368	879.4	1593.1	1993.7	1643.8	754.6	515.2	938.3	569	360.4	3626.6	6771.7	552.6	435.3	599.6	1345.1	1410.4	458.3	5350.2	3376.3	515.1	564.3	2557.3	477.7	1384.5	1131.2	758.3	22369.1	392.7	330.3	760	624.1	1442.6	1202.5	579.8	1676.6	2259.3	2491.7	706.2	761	8179.2	3442.7	1185.8	933.9
2697-7_2	1898.6	2412.5	1567.8	1486.6	1629	1716.4	1705.3	1483.6	1388.2	1651.1	1943.9	1552.8	1912.9	1901.4	1478.1	1821	1645	1792.1	1598.4	1421.2	1513.2	1425.5	1835.4	1610.5	1808.9	1594.3	1798.9	1638.3	1654.7	1631.5	1425.4	1573.2	2379.7	1503	1407	1604.8	1562.4	1760.1	1465.7	2039.7	2058.7	1585.2	1584.6	1303.2	1545.7	1663.9	1482	1785.8	1180.9
2700-56_2	1829.8	1938.1	1909.3	1825	1993.1	1685	2273.2	1780.2	1697.9	1854.6	2787.1	1667.9	2014.3	1496.8	2007.9	1253.3	2292	2165	1671.7	1933.9	1985.2	2755.3	1804	1668.3	1838.9	1908.9	1908.6	2254.7	2099.3	1889	1832.3	1967.9	2849.8	2019.7	1813.9	1881.6	2319.6	1396.7	1950.5	1977.7	1857	1561.9	2161	1892.6	2115.5	1781.8	1588.2	1808.4	1719.6
2788-55_1	9259.2	4916.8	3851.5	6890.9	11786.6	4072	9902.7	3450	4829.2	11493.3	6697	16953.7	8071.2	7510.8	2185.9	11002.5	4100.6	3915	4223.7	4250.2	9186.1	18924	2163.5	5184.3	4827.1	2157.1	8900	3935	9920.4	2416.9	3357.6	4533	8478.9	8275.4	8013.1	5830.8	6150.1	4279	3551.4	4726.9	3762.1	9313.8	2796.1	3448.2	5719.2	18530.6	4609.6	5016.3	12969.3
2848-2_2	293.6	284.3	348.7	247.4	238.4	258	231.5	264.5	349.3	277.3	319.2	265	283.9	319.8	372.1	257.7	289.2	345.5	289.2	281.1	280.2	350.9	350.4	255.5	314.6	322.8	312.8	256.9	258.7	282.2	304.2	285	231.3	297.4	276.2	273.3	235.3	293.7	322.1	265.5	290.7	314.7	295.9	277.2	316	215.1	268.9	280.7	294.1
2851-63_3	3673	2035.5	2017.4	8307.5	1352.5	3140.6	2061.5	3104.2	2038.7	2473.1	3227.4	2065.2	4383.8	2489.2	1858.6	12899.3	4538.3	1950.5	2398.2	2426.7	3304.5	3348.3	1594.8	3057.8	3596.5	2010.2	1902.4	3031.7	1785.4	2253.4	2063.3	2075.5	2750	3934.1	1821.1	4169.2	2332.3	2003.9	3163.3	2688.6	13411.1	5951.6	2333.8	2027.8	3817.3	4118.1	2785	2774.1	2975.2
2879-9_2	365359	247904.6	253458.3	210658.4	186207.8	220317.7	290492.5	222231.6	221984.6	237127.2	315135.2	201586.3	247525.4	210460.6	200063	209024.3	346397.7	245611.7	193383.9	207456.5	247823.7	273588.6	168095.5	225024.1	237442.1	212318.9	225787.6	315677.2	231467.4	229622	248474.2	224941	258656	215719.4	292049.9	175804.3	259172.9	222845.1	264174.2	214490.9	307876.1	269621	305490.1	210219.2	220734.9	324370.8	329751.6	266561.4	210910.9
2943-5_2	2715.7	7610	2475.8	3273.9	2696.2	3204.6	2202.2	2654.4	2699.2	2581.9	2455	2152.1	3120.5	4948.9	2124	4969.3	2543.6	2752.8	2733.4	1888.1	2950.8	2002.3	2762.5	2858.9	4349.4	2830.3	3587.2	2091	2222.5	2675	2711.1	2383.3	6203.6	2657.5	3091.3	2918.8	2464.7	3507.6	2773.5	3779.5	4069.7	2649.4	2480.3	2238.5	2868.1	2223.9	2365.2	2372.3	2263
2953-31_2	4448.5	14853.7	6374.5	5108.3	8028.3	4476.6	5573.7	2978.5	4570.9	51669.2	9615.7	5540.2	7652	17747	3306.3	8027.4	54184.5	9936.2	7685	5589.3	21888.7	3876.2	4940.9	6229	30442.8	5494.4	8826.6	8713.5	7449.1	11010.5	7861.6	2322.8	30645.4	5626	33747.8	8465.3	4446.7	17491.5	9036.8	16009.1	1546	1183.4	6619.3	1225.1	8329.6	15167.5	1776.8	26644.3	11618.9
2973-15_2	3728.7	10911.7	3418.7	2413.6	2650.7	4133.9	3754.3	3756.2	6675.2	4891.5	5353.3	3324	3603.4	8343	2743.6	8196.2	3084.7	3528.7	3855.2	2743.8	5140.6	4506.4	3153.2	10202.3	7739.1	4443.1	3774.1	2967.7	5376.2	3281	2065	3312.5	6656.5	2750.8	5348.5	2942.7	4930.6	5365	3559.3	9249.7	2630	3320.2	11772.7	1907.2	4257.4	2275.8	2163.6	4805.1	2790.3
2974-61_2	18692.6	16145.1	22088.1	18392.6	20079.4	25909.5	18328.1	28197.1	19109	21332.8	11926.5	16375.6	16938.4	24586.9	27838.4	13661.1	16816.1	17611.1	18943.3	19782.9	20035.5	15100.1	26341.4	9459.6	22207.6	18023.9	19043.8	11768.6	12666.4	30728.2	18646.4	24543	9902.4	18097.8	21112.1	18075.9	15959.1	12586.8	28825.5	15006.6	11963.2	14427.3	16695.5	18229.5	19055.4	9564.6	16362.7	17136.9	21867
3032-11_2	7098.8	2315.9	6042.8	9909.8	4051.4	2967	3500.8	2303.1	9130.4	116694.3	6739.5	2582	2047.8	7188.7	6249.2	3974	84611	2566.4	2136.1	5452.5	74624.9	5995	5591.4	3994.7	47791.6	6545.4	1402.6	4738.3	2863.7	3738.8	5454.2	1722.3	5927.2	3975.2	10857.6	4347.7	2968.5	12972.5	5676.5	5329.1	167.9	187.5	6230.9	500.5	2676.7	10867.6	1964.5	62671.8	9886.7
3038-9_2	367.1	403.1	373.1	281.2	347.2	369.3	327.9	470.3	404.3	426.1	317.2	385.5	328.1	420.4	388.3	530.1	294	464.8	342.4	310.2	280.3	262.2	482.9	478.2	338.7	366.5	372.9	309.3	352.1	391.9	399.5	347	599	347.7	324.8	399.1	284.1	529.8	326.1	357.8	356.3	384.5	380.9	278.8	121.1	372.2	361.8	383.4	348.2
3054-3_2	1417.2	9565.2	2858.1	3708.4	3848.7	1590.4	9187.6	2819.1	4264.6	6532.1	5361.8	3402	4258.3	2638.8	3929.6	3326.6	13148.4	1931.1	6168.6	4015.3	4323.2	3242.6	2852.3	75.2	6951.9	1390.2	3318.6	8077.8	3560.1	2541.7	2942.3	3583.6	19299.8	2351.7	3031.5	76.8	3641.5	4597.8	5192.7	7702.8	4833.9	1749.6	120.2	5466.3	7314.7	10073.2	5366.5	6817.8	5854.8
3057-55_1	4537.2	3954.4	3180.3	3456.3	3963.1	3998.1	2897.8	4068.6	3533.2	2849.3	3214.9	2982	4000.9	3447.1	3843.3	3497.7	4753.4	2723.6	2606.8	2953.9	3197.2	3320.8	3515.5	3206.9	4124.4	3471	3090.8	3093.2	3154.2	3529.3	4513	4560.3	4874	3567.3	2998.5	3212.8	2808.1	3352.4	3395.6	4061	3060.5	5413.2	4245.4	4022.7	4900.2	2647	4186.4	3795.5	3111.4
3074-6_2	28393.3	16764.4	9914.3	10721	20583.5	8939.5	10714.1	20371.9	14056.1	18460.3	13937.7	8617.6	15097.2	15994.1	14712	10567.1	19027.2	16872.3	9279.4	13727.7	14883.7	17599.3	16590.1	28997.2	11191.1	9750.4	15563.3	18946.3	7125.5	7762.1	20569	9312.5	34890	14463.9	16762.6	11079.2	20917.8	28916.8	13634.4	9643.7	18615	12827.4	16922.8	18208.7	17126.3	25956	32993.4	17629.5	12905.7
3077-66_2	1100.1	2014.1	1423.7	811.6	514.7	1710.9	724.2	628.3	2135.3	1445.8	2631.6	724.4	1963.8	746.3	571.5	948.4	566	1799.2	2481.3	1627.6	2023.1	1572.6	670.1	1098.8	1050.2	764.1	575.8	1517.9	1529.1	924.6	952.4	700.2	2918.6	1341.5	1379.8	1275.4	1820.1	1500.6	1217.4	1022.7	3436.3	638	647	1672.9	828.1	1316.8	653.9	502.3	1689.2
3079-62_2	975.3	1067.6	997.6	1010.4	872.5	873.1	917.7	999.7	1494.6	806.6	1047.1	929.5	950.9	931.4	769.9	1849.1	753.3	1107.2	1256.9	1481.2	958.7	1784.4	735.3	1133.1	627.9	843.1	933.5	1155.3	820.2	928.3	956.7	877.4	1149.3	908.9	950.6	937.3	1236.1	1265.6	859.5	793	996.1	1055.3	701.1	1369.3	1121.5	1155.5	1155.3	981.1	988.4
3198-4_1	1307.1	1329.7	1300.1	948.3	1117.4	1240.8	836.4	1341	1240	1224.2	1251.6	1128.1	1457.7	1597.3	2367.7	1226.9	809.5	1177.9	1392.5	1089.9	1225.8	1194.6	2363.5	896.3	1178.7	1235.6	1018.7	803.7	939.1	1482.8	1318.5	1387.2	1631.8	1456.1	1233.9	1446.6	942	1821.1	1366.9	1344	1523.1	1562.8	921.3	1198.9	1320.2	798.3	1248.3	1241	1334.4
3283-21_1	6828.9	5723.2	8233.2	5180.8	5811	6418.7	9077.4	3652.8	12629.8	10995.2	7997.7	8735.6	6981.3	11367	8649.3	6735.5	5711.6	11622.3	12327.1	8531.1	7552.2	10739.1	10584.2	9985.2	7762.7	5381.4	8625.7	5606.7	7477.8	10133.5	7251	5490.5	5378.4	6660.4	13411.9	10750.9	20423	9844	7460.8	7423.6	12239.7	4415.8	8311.5	7302.7	5203.6	10683.7	3620.1	4868.5	10571
3290-50_2	5240.5	4383.1	8132.7	7606.8	9647.8	6494.4	8061.9	5126.5	6204.7	6439.5	5745.8	6136.3	6498.7	6917.9	9971.3	6157.7	6146	6208.1	6724.7	7766.1	7112.3	5167.8	8615.3	4040.8	6933.6	6576.9	6659.1	5641.3	5134.4	9558.1	4964.1	7046.1	4126.4	8105	7559.5	5966.8	5458.2	7257.1	4737.1	6351.5	5738.1	3764.7	7595	4119.3	5868.9	5364.5	3086	8870.4	7249.3
3311-27_1	590.5	491.5	753	490.1	631.2	603.9	730.9	491.1	696.5	873	508	520.6	531.9	727.2	466.6	759.2	824	667	349.7	457.4	712.1	583.7	446	1849.1	631	1146.7	568.9	741.4	722	860.7	501.7	456	976.3	493.2	772.7	593.8	568	608.8	514	606.1	551	714.3	1759.4	500.3	353.3	627.8	498.2	665.2	563.3
3326-58_2	2094.5	1362.7	3561.3	3023.8	2863.6	2571.9	3040.7	2446.2	3483.8	2933.7	2211.3	2298.7	2421	1894.8	4728.5	1851.4	2135.9	2649.8	3068.3	3416.4	2463.5	2517.4	3721.8	2005.1	1949.3	3029.8	2322.9	1971.7	2317.9	2634	2132.2	2616.4	1590.7	2934.5	2044.5	2441.9	2855.7	2616.4	2952.9	1954.2	1872.8	2419.6	2243.3	1283.1	2968.3	2384.8	1216.2	2441.8	2993.9
3340-53_1	17735.6	8375.3	43178.8	22797.1	19389	24584.9	24757.3	22240.5	33081.5	19151.1	19513.1	19484.4	21676.3	39622.8	36174.3	12180.3	12851.8	17369.1	26878.5	26538	16529.7	17676.9	42806.8	16448.1	20326.8	39704.6	26898.9	12220.7	13416.6	19445.4	19669.1	17398.8	5002.1	34529.1	17220.3	24720.8	19212.1	20576.2	23753.1	16723.6	12830.6	12042.7	14409	16413.1	15555.9	15959.9	16975.8	17018.8	19163.4
3352-80_3	1103.1	3180.6	5869.6	4473.4	1765.6	1558.7	4805	1981.7	3304.9	417.2	440	6661.3	2861.7	4512.2	2744.1	2590.2	854.3	2148.7	3258.3	1515.9	1579.6	1722.3	3201.5	1055.9	1989.3	4797.7	4260.5	1086.1	4240	1878.4	4229.5	2210.6	178.7	5352.9	3174.1	2033.6	1376.6	997.5	8104.1	1388.4	3043.4	1584.5	1194.8	1633.5	2213.5	2263.5	1463.3	1373.3	5503.1
3362-61_2	706	559.4	780.5	664.6	715.4	717.2	847.4	619.9	710.3	782.5	462.6	658.2	702.9	1196.6	693.3	737.7	669.1	734.5	612.5	871.7	568.2	698.6	810.5	672.8	763	701.3	835.9	733.6	623.4	1358.6	867.8	709	533.9	721.6	744.5	638.2	784.7	650.5	836.2	1282.5	544	643.6	545.7	746.3	654.8	744.4	688.1	777.7	673.7
3378-49_2	593.6	693.9	937.3	693.9	813.4	1099.2	786.8	800.2	928.5	718.3	592.3	1079.5	849.7	1009.8	1004.7	620.2	471.6	838.5	795.3	773.8	805.9	777.7	1141.2	540.1	747.8	796.9	1357.3	501.3	1156.7	1032.6	1057	996.9	404.8	1264.4	714.7	783.9	538.8	689.7	933	627.4	748.4	712.4	677.2	531.7	640.6	590.1	803.2	603.2	747.9
3389-7_2	128.3	328.3	1763.2	117.1	274.2	131.1	586.9	102.7	106.9	1424.4	92.8	656.6	116.7	119.8	975.2	86.5	99.7	959.7	1827.7	2099.6	101.8	1933.9	1216.3	798.1	98.8	1503.4	140.8	157.7	1095.9	171.3	2119.4	2058	666.5	106.2	111.5	127.7	116	197.6	102.9	964.1	97.7	241.7	2028.9	1050.9	99.1	104.4	314.9	128.8	111.9
3449-58_2	9027.7	6459.1	9731.8	10119.6	12292.2	15941.8	12209.1	14343.5	13412.3	10960	14697.8	12168.7	13251.1	15090.2	13359.6	13937.6	8943.2	14534.9	12991.9	12707	15089.3	16526	12121.8	8625.6	11328.2	10513.5	14171.3	8673.7	15057.6	18654.6	13110.1	14759.6	4041.7	17711.5	16093.5	12703.7	14029.7	9304.4	16922.8	13581.1	12803.1	13443.6	13050.3	14496.6	20425	8437.3	9493.6	14025.9	16136.3
3461-58_1	1533.1	2533	1028.5	897.5	1075.4	980.4	1025.3	904	1584.9	1126.4	1529.3	1259.7	2336	1499	1969.5	1741.2	756.9	1341.5	2188	1149.3	2120.4	965.7	2212.6	1137	2103	1199.6	1658	1054.8	1370.3	1018.2	878.1	808.4	5425.5	1504.5	1151.6	1742.8	1247.3	2718.6	1465	1681.6	1008.9	750.3	785.3	631.1	2532.5	707.9	876.9	1294.2	1871.8
3504-58_2	16111.3	1862.2	843.7	2101.5	1220.5	3605.8	2584.3	4420.7	880.6	355.7	3504.6	474.2	209.3	366.4	479.7	2798.9	6733.8	1389.6	740	1332.8	2697.5	4003.3	1308	4618.8	3337	532.6	3491.2	4086.7	1393.9	162.7	1592.8	3869.9	5659.3	455.9	200.3	3850.4	3963.7	1199.5	191.8	149	227.9	489.5	2751.2	413.7	703.8	2548.7	5907	1510.9	1691.7
3508-78_3	581.8	593.5	554.5	610.8	761.6	708.4	478.9	616.9	914.9	603.3	385.8	682.4	694.4	685.6	641.5	587.2	647.5	531.8	810.3	696.7	599.3	606.7	673.2	649	619.5	459.6	665.4	484.5	570.8	547.3	516.1	593.3	556.7	547.7	517.4	967.4	672.1	436.7	633.8	422	473.4	508.8	634.6	505.4	499	491.8	439.4	508.2	573.9
3613-62_5	3771.8	1325.9	1580.2	3009.1	853.6	2327.8	1187.8	1490	1447.6	1892.1	2922.3	1274.6	1625.3	1278.8	1779.3	1376	2198.4	814.1	893.3	949.9	1346.7	1043	1054.8	2349.4	1154.5	971	756.9	2354.1	1257	1440.3	2175.8	1814.6	5415.4	1788.9	926.1	1264.4	1136.4	2019.4	2335.7	1754.2	1362.8	3702.4	1231.8	1190.6	1104.2	859.9	1294.6	583.5	2448.3
3617-80_4	793.4	804.1	1146.4	1377	1018.5	1057.8	1417.7	1268.2	1384	1132	1533.2	1193.4	832.5	1478.3	1509.5	1111.4	656	1322.7	1325.9	1652.2	1490	1345.9	1362.3	978.5	609	1128.5	1762.9	642.9	1244.1	2000.7	819.6	1308.6	1107.5	1011.5	1640.9	1044.9	1401.3	1455.5	770.1	852.6	1330.3	1261.5	790.2	1020.8	992.1	648.2	950.8	837.3	1471.8
3714-49_2	420.9	219.6	651.5	517.8	656.5	4278.1	282.7	319.9	613.9	355.5	760.2	833.5	638.5	390.3	536.5	282.4	242.8	544.7	628.3	1086.4	451.7	420.7	1681.9	225.4	891	353.3	312.8	360.4	359.2	377	676.9	507.3	209.9	969	436.2	1075.9	416.4	585.3	528.5	1084.6	522	229	384.7	551	263.3	736.9	648.6	174.8	455.3
3848-14_2	3440.9	3750.6	3454.4	3084.8	3013	2562.7	3042.6	2828.3	3654	2976.5	4544.5	2372.6	3854.1	3853.6	3651.7	3058.1	4931.5	3948.8	3193.6	3429.6	3981.3	4193	3184.8	2953.4	4507.3	3578.9	3472.4	3725.6	3334.4	3541.4	3154.7	3247.7	3302.9	3433.8	3195.3	3208.3	4219.9	3178.4	3439.4	3339	3655.6	3787.4	3659.4	5538.5	3437	2988.9	3179.2	4161.2	3002.7
4126-22_1	972.5	831.8	842.6	936.6	970.8	981.9	807.2	923.4	987.6	771.3	996.2	1114.4	1032	921.4	1016.5	903.7	904.5	1027.3	891.9	991.4	921.5	1152	933.7	1023.5	870.4	879	1036	813.8	921.7	949	1215.2	951.2	986.5	987.2	970.4	1007.2	1073.9	949.1	889.5	1095.5	762.8	787.6	882.4	933.4	798.1	940.4	860.2	1008.5	923.3
4141-79_1	1789.6	970.3	922.2	1414	1133.6	1063.5	955.6	887.1	932.9	1613.4	1048.1	944.4	963.8	1146.2	1031.6	1137.1	1718.9	954.6	1048.8	937	999.3	930.1	1084.6	1281.7	1257.6	827.6	872.7	2015.7	928.5	838.6	4005.6	1701.9	4653.2	824.5	1057	1006.4	1022.9	1269.1	927.3	970.3	792.8	1371.6	871.4	386.9	911.2	2668.4	1469.4	971.8	869.7
4151-6_2	4775.6	4302	3162.3	4369.3	3677	3530	5399.9	3224.8	6454.5	5260.4	5916.4	5421.3	3574.7	4591.9	3396.2	8106	5421.1	5016.8	3769.3	4824	3973.8	6415.6	3226.5	9415.8	4900.8	3564.9	4385	5052.1	4936.6	4987.5	3640.4	3762.8	4443.8	4254.8	4929.5	5400.8	7073.8	5908.1	4447	3652.5	4539	4423.7	5064.4	4734.4	3378.3	8684.1	4706.7	4757.3	4359.1
4152-58_2	4329	3319.3	3216.5	3136.1	3548.7	4799	4048	5115	4632.1	2692.4	5784	4018.1	5180.4	5407.6	4198.5	3702.9	4650.5	3819.2	4517.4	5357.6	5961.6	5629.8	3685.8	3137.9	4688.4	3224.7	4323.5	3230.6	4221.9	3786.9	3288.6	5221.9	2708.4	4962.7	5881.5	2221.4	4799.9	4452.3	3712	3779.9	3503.2	2807.2	5166.3	4525.6	4415	2955.3	2803.8	3872.7	4963.8
4159-130_1	20624.7	21005.3	21260.8	19225.1	17774.6	14661.3	19181.4	16487.5	21596.5	18415.4	28604.2	13326.2	21804.3	18487.2	20558.9	17896.6	29726.7	22745.6	19624.9	21606.9	24155.9	25276.9	18589.9	16725.5	26767.5	21115.9	20336.5	23113.1	18842.9	19760.6	18126.3	19818.1	18335.3	19590.3	18514	17774.3	26585.9	18766.4	20978	19162	21937.2	23194.5	21034.9	21648.3	21612.1	17340.5	19318.6	23640.9	18356.2
4160-49_1	9822.6	7417.7	18207.2	12677.9	12689.1	16527.1	11953.6	13945.1	15507.4	12994.3	9380.3	15733	12604.1	23474.1	23135	10566.1	8052	12241.4	15141.9	15664.9	8063.8	13619.6	20921.4	11711.1	12268	14963.1	17354.4	7935.8	11107.6	18242.8	17140.1	12898.6	7967.7	27193	17768	18032.8	14785.8	9432.1	20835.9	16312.7	14015.9	10292.5	11164.2	12112.5	10580.9	8133.1	11233.4	11439.5	15032
4232-19_2	2760.9	1607.4	3002.2	3627.1	3499.6	2765.7	3640.1	2390.2	2894.3	3304.1	2589	3126.3	3190.7	2505.2	4739.4	2793.2	3109.9	2766.4	2985.4	3008.2	3412.5	3108.1	3654	1864.7	2553.3	2437.6	3101.1	2259.5	2727.5	2679.5	2309.8	2769.4	2270.1	3270.3	3073.4	2903.2	3380	3020.4	3231.6	2435.8	2568.5	2510.2	2720	1362	2820.9	2609.4	1465.7	3185.9	3596.2
4328-2_2	1529	1221.8	1806.2	1383	1598.1	2122	1458.1	2209.7	2420.8	1743.2	1334.8	1418.5	1649.3	1944.2	2382.2	1196	1328.4	1505.2	1504.7	1505.3	1579.9	1413.4	2159.9	885.8	1678.9	1560.9	1598.2	976.9	1150.9	2569.6	1616.8	2026.2	867.6	1429.9	1696.7	1661.2	1309.9	1376.9	2168.3	1339.2	1097.2	1299.9	1634.2	1518.1	1648.8	945.4	1344.4	1534	1776.1
4336-2_1	28971.9	5022.1	45845.8	32440.8	26209.1	10194.2	1538.6	20573.8	18398.8	9728.8	444.3	17069.5	1044	510.3	3749.8	555.3	188667.5	430	798.9	4861.4	17288.6	912.3	3377.8	710.1	5527.9	7028.4	479.9	81741.6	8079.6	828	7908.5	28702	119623	1409.6	499.5	205.6	14578.5	1566.5	633.3	24400.8	15080.9	1867	7204.3	3937.1	7813.5	101811	82457.9	556.2	568.1
4337-49_2	70980	44467.1	50481.6	28941.6	21092.6	3161.4	29106.1	35601.5	48585.7	17352.8	37394.1	5934.5	7586.4	4397.9	1854.1	34739.7	53388.8	44717.1	2182.9	9141.1	21847.5	14290.7	2718.7	24200.1	29110.6	27564.7	3601.3	50831	3176.1	2242.3	6908.1	6607.6	35741.4	1442.1	6886.8	21678.9	12393.1	53260.5	7682.7	15822.8	20411.8	45175.7	47572.5	3304.6	25288	64230.7	63919	10421	14984.2
4495-33_2	26272.1	20838.6	31677.3	21752.5	28564.1	26043	22911.6	23248.8	25083.3	34575	33680.4	21037.3	24621.7	28191.1	28549.7	23799.9	27338.3	31414.2	30801.4	30880.9	31218.8	41053	24018.8	29233.1	25772	31831.7	27354.5	25095.2	26897.2	26751.4	28615	34422.9	30110.7	28462.7	28406.4	22938.7	27952.5	25954.5	30147	33974.4	28871.6	43696.3	39488.8	26831.7	30342	19763.9	19221.3	29805.4	33068.9
4498-62_2	3907.5	3143.1	5787.5	4803.7	4789.7	5028	4579.4	5304.3	3865.1	5438.7	4132.4	4963.6	3883	6380	7015.6	3444.7	4647.6	5373.1	5753.5	7423.4	5303.5	6624.6	7569.3	2873.3	4948.7	5118.8	5656.6	3026.7	3992.7	5667.7	4987.3	5013.1	4030.5	4422.7	6135.2	4740.1	3922	3235	5901.1	5566.2	4764.8	3745.1	4082.3	3598.7	4534.5	3064.4	3547.9	3586.1	5281
4541-49_2	1738.4	1796.2	5430.8	4221	3244.8	3498.6	2328.8	3746.7	3745	2007.7	2287.9	3118.4	3030.2	4052.1	8205.5	1990.6	1131.7	3021.2	5262	5550.3	2881.9	2297.1	6701	968.8	2228.4	5752.7	4335.1	971.2	2291.2	3902.2	3786.8	2830	869.1	6430	2637.6	4274.7	2369.9	1642.7	4452.2	2928	1070.2	1774.4	2408.8	2315.9	2637	1062.6	2668.1	2024.3	3317.5
4544-4_3	10148.9	31631.1	12790.1	10090.9	14703.3	11769.1	12982.9	12046.8	7850.5	14387.1	11254.1	10275.4	14594.2	18877.7	10631.3	22023.3	9383.4	8952.5	12501.4	12217.4	12152.2	7492.7	21353.7	9070.9	17438.5	14832	6243.2	10814.3	12703.4	10507.1	6107.8	12211.3	37113.7	7418.6	3806.1	13706.1	7585.7	9392.3	9893	26561.1	15306.4	11802.9	5588.4	8698.3	17290.4	4819.6	5531.2	7180.5	3660.9
4569-52_2	588.5	490	450.9	407	372.7	520.6	327.4	420.5	599.5	331.7	470.4	440	464.6	1071.5	492.9	502.5	535.1	394.2	431.9	506.1	515.5	504.1	341.9	403.9	735.3	304.7	409.6	513.8	444.7	499.3	426.9	509.9	683.5	464.6	611.1	499.8	353.2	560	609.1	524.9	369.3	1056	669.4	349.6	541.9	327.1	352.4	655.4	584.2
4763-31_3	5445.2	4029.2	5636.7	5552.8	5467.7	8341.8	5199	6882.4	6006.7	5144.8	5858	4801.5	8718.3	7083	8001.8	5814.7	4695.3	6139.1	8096.2	7502	8946.1	6823	7106.4	3638.2	6300.2	6412.7	6525	2826.9	7353.3	10547.1	6893.3	9357.5	1568.2	6538.9	6430.4	5397.7	9181.3	5116.7	8358.3	6855.3	5791.5	6916.5	5551.3	8606	8134.1	3148.5	7146.7	10797.6	6222.2
4775-34_3	43085.9	24040.3	48828	48652.1	55192.9	45292.9	50299.1	38324.3	43957.1	46492.9	43138.7	52584.1	39532.1	32077.9	55987.9	40106.7	26018.7	55347.8	47387.6	49602.6	38393.9	19905.2	51698.3	27255.7	37896.3	42002.2	48010.9	41268.7	51507.6	43422.8	43976.3	45258.4	8585.2	46064	44591.6	51146.9	45222.5	43306.6	39442.3	38879.7	46115.8	45406	44710.2	23637.6	550	46056	25178.6	54953.4	52405.5
4834-61_2	1356.5	894.8	3086.3	2609.6	2472.5	1832	1988.7	1588.9	1907.9	2746.9	1316.4	1794.4	1544.8	1466.4	3367.6	1810.1	1468.2	1706.9	2274.8	2139.8	1384.3	1779.6	2971.6	3418.9	1273.3	2546.4	1737.1	1327.9	1607.3	1676.5	1435.1	1708.7	1367.4	2535.1	1825.6	2330.6	2187.4	2070.1	1726.3	1555.2	1411.3	1819.5	1272.7	936.1	1454.1	2622.1	1157.5	1839.7	1775.4
4874-3_1	950.9	717.1	1026.2	866.8	1207.2	1197	930.3	1281.1	2216.2	930.9	921.6	1205.5	1008.9	1066	812.1	1283.1	1319	1068.9	1352.9	1257.8	1163.1	1044.3	667.4	1178	1123.3	1027.5	1209.1	1134.7	1365.5	999.1	927.4	1329.1	744.9	1200.4	1063.9	1438.7	1010.9	985.2	1182.9	1195.4	948	788.1	588.9	983.1	1217.1	1348.8	1141.7	1021.7	1426.1
4907-56_1	700.7	482.1	687.4	1350.1	502.8	706.1	537.7	674.9	9130.9	694.9	777	582.6	506.2	746.6	807.4	1257.4	1157.1	760	560.3	1112.8	712.1	1123.3	576.6	722	414.6	557.1	863.9	810	669.7	742	553.7	556.1	704.9	644	739.8	507.1	924.3	803.6	593.3	632.5	1125.7	1014.4	972.3	1096.7	339.1	894.3	593.3	848.3	562.4
4914-10_1	364.5	883.6	346.3	409.4	436.7	335.3	683.1	1575.1	373.8	3653	561.3	416.2	1475.1	764.4	1184.2	1315.9	2627.2	593.9	366.6	414.8	7039	1203.7	1280.2	795.5	1150.7	338.5	466.6	381.1	426.2	594	576.1	363.3	417.9	355.8	1943.9	368.8	402.6	495.1	399.8	596.4	461877.4	467500.6	461.6	84772.5	424.7	746.2	635.3	1267.2	759.3
4924-32_1	366.4	2390.1	587.8	415	800.6	415.4	467.8	696.7	653.8	823.4	321.2	696	588.6	2075.1	797.2	1660	515.8	365.8	518.9	551.9	1849.6	420.5	1057.7	889.2	528.4	564	437.4	937.4	1306.6	473.1	526.1	616	1265.9	612.1	746	1071.5	305.1	504.7	403.7	749.4	545.5	550.4	639.5	653.9	474	470.4	467.3	281.1	579.1
4979-34_2	1288.3	905.5	2730.4	1682.9	2007.2	1674.7	1783.5	1881.5	2209.8	2396.3	1311.2	2199.5	1319.7	2211.2	2649.8	1332.5	1371.1	1398.7	1465	2427.6	1907.1	1403.1	2986.5	2555.5	1700.7	2523	2284.9	1069.5	1558.5	1486.1	1502.2	2219.8	688.7	2147.1	1937.8	3221.8	2159	2211.5	1650.5	1564	1117.3	1403.3	1771.9	1261.3	1464.8	1788.9	1330.3	1446.2	1637.2
4989-7_1	7466.7	4104.2	6683.1	13353.4	4977.7	7223.2	5149	6605.6	75919.8	7076.2	8261.9	4048.3	5025.9	7349.6	8301	14740	12410	7338.6	5347.9	12085.5	7258.1	12308.1	5778.4	7241.5	4187.7	5290.5	8154.2	8279.6	6566.8	7033	5541.6	5613.7	7323.6	6345.1	7798.3	4845.2	9761.8	8471.1	5906.3	6572.4	12038.2	10582	10053.2	11695.4	3434.7	9293	5433.4	8006.8	5465.2
4996-66_1	836.2	599.8	1240.3	630.2	924.3	1525.6	1212.5	969.7	1027.3	1280	1284.5	1122.7	1100.4	1484.5	1318.1	1011.2	1229.9	1075.7	792.3	784.8	1578.7	1141.2	1152.6	687.7	1066.1	1269.5	1294.6	1223.1	1284.2	921.5	1035.2	1174.8	891.8	1195	1675.1	1150.6	1230.4	762.4	879.7	1138.1	1043	1247.9	1124.2	1656.4	823.7	552	932	652	1236.1
5029-3_1	564.5	505.9	1308.9	903.7	648.2	836.1	534.1	704.6	1065.6	520.9	481.5	631.1	631.7	831.9	1257.3	580.6	492.1	532.9	875.8	977.5	588.9	518.6	1451.2	545.7	773.4	1085.9	642.6	353.3	492.9	547.7	658.9	566.7	335.5	1021	585.1	910.6	569.9	497.3	907.4	562.7	600.5	462.1	394	983	454.9	458.4	576.8	525.1	583.5
5030-52_1	12704.4	6443.6	1889.4	32312	2242.1	13736.1	7276	3341.2	3108.5	2597.5	2799.4	9813.2	26693.4	12093.4	6549.8	20600.6	13461.7	3655.2	3419.8	1858.9	9112.2	4037.7	5020.4	3004	5511.7	2171.5	3241	2777.9	7499.7	5745	1690.8	1558.4	2344.4	31674.7	12765.9	17432.4	12664.7	3998.7	14383.9	3615.4	30493.3	7421.5	1857.2	12037.5	2451.8	13738.4	5215.6	15692.6	6664.2
5031-10_1	136.4	158.8	163.6	123.1	143.1	127.1	125.3	135	140.4	122.6	130.8	152.3	148	115.7	142.9	129.6	158.2	149.7	138.4	145.5	144.4	469.7	134.1	179	119.7	187.4	145.5	129.3	147.2	225.4	332.7	150.8	109.3	155.1	118.3	130.6	137.3	151.8	149.5	113	118.2	134.5	136.6	1048.4	138	135.1	1293.8	139.1	165.6
5073-30_2	10763.7	9615.6	6416.8	9324.3	8100.5	7540.5	12113.4	5884.4	9983.9	11836.9	12159.3	12424.6	6393.3	9490.1	6346.3	16732.3	10642.9	10546.6	6853.8	9807.9	7683.8	12617.6	6274.1	21972.9	10372.9	7430.8	9650.9	10548.2	10259.3	10732.4	7906.2	8028.6	9848.8	9107.3	9817.2	12153	16492.5	13532.9	9553.5	7370.3	8917.8	8797.5	11174.4	9918.6	5882.6	20602.1	10456.3	10536.4	9041.4
5077-28_3	2739	2115.9	1785.7	2142.4	2115.8	2440.4	2975.9	2165.7	2712.4	2615.9	3389.5	2974.7	2385.4	2722.6	2126	3717.3	2911	2619.1	2170.5	2848.8	2666.7	3582.7	1996.4	4278.1	2732.7	2040.5	2456.1	2567.5	2775	2568.4	2027.7	2616.9	2347.7	2503	2937.5	2630.5	3632.1	3401.4	2269.8	2123.6	2358.3	2227.1	3108.7	2638.2	2067.9	4200.8	2360.8	2600.8	2662.4
5089-11_3	229.7	215.8	269.5	233.8	210.2	252.2	234.2	213.3	240.2	216.6	485.6	227.4	296.7	358.6	263.2	236.9	243	281.5	240.8	258.1	269.9	259.6	239.5	292.5	271.3	260	261	265.1	252.5	747.7	265.1	220.5	269.5	271.4	381.5	239.9	269.5	223.1	244.7	226.5	213	184	200.7	223.1	241.2	177.4	450.9	220.5	864.9
5105-2_3	935.1	748.1	707	762.7	798.5	1009.8	953.4	971.4	970.9	781.1	1097.2	1016.2	1057.9	1086.1	919.5	943.3	971.1	915	835.9	1012.5	1005.5	1203.9	820.3	981.3	943.2	760.5	947	771.1	924	1028.3	789.7	1022	760.7	983.1	1091.6	999.9	1131.7	1003	827.7	820.5	898.6	678.5	1006.5	1014.1	848.2	979.7	724.1	876.4	1002.4
5107-7_2	11624	9359.8	15070.2	11764.8	13556.1	16809.4	11426	15006.5	13911	14358.7	10613.9	12866	12439.2	15656.3	16902.4	12027.5	12067	13057.9	12093.2	13366.6	12266.6	18222.8	16859.7	13797.5	11665.9	13018.9	13696.7	8506.1	11070.2	16157.5	13587.3	14391.2	8251.3	12000.4	14013.6	14207.3	11079.5	8222	15308.5	13320.3	12114.3	13078.2	13766.7	10929.3	12462.3	10622.3	10357.8	12352.1	14029
5108-72_3	307.4	444.7	314.5	541.4	265.6	271.2	268.3	388.3	234.7	298.5	221.7	599.3	269.4	380.8	296.6	246.5	271.8	256.9	259.4	312.2	270.2	236.1	286.6	305.8	305.2	329.8	341.8	282.3	258.2	388	283.6	274.7	259.2	327.5	324.5	329	357.7	302.5	235.2	262.2	225.8	247.7	252.9	1655.5	188	299	295.3	338.4	336.3
5109-24_3	6383	4191	10845.7	10010.2	9817.3	7855	7847.5	9296.9	7137.2	46057.5	9410.5	7661.6	7403.6	11825.1	12391.3	8405.7	8510.7	9155.7	11199.5	9326.3	11213.5	10991.5	10242	4387	6537.6	10010.7	7208.8	5452.1	9181.6	14921.4	10159.2	10999.4	4641.7	11624.9	13044.6	8026.2	9048.6	11662.5	15096.2	11039.9	7338.3	6123.9	7945.1	5634.8	7621.3	6146.4	3706	11369.9	9170.9
5116-62_2	1152.3	1014.4	1654.4	1474.7	1268.3	1437.2	964.6	1419.1	1335.6	1448	1094.3	1229.4	1247.3	1526.2	2229.6	962.4	1157.7	1189.6	1268.5	1752.6	1157.3	1244.4	2119.2	1001.6	1273.5	1543.4	1236.9	788.8	1032.1	1629.3	1472	1365.9	896.5	1514.3	1269.3	1324.5	980.1	1013.2	1578.4	1364.4	1067.3	957.7	1058.2	1161.7	1112.3	873.4	1070.7	975.5	1265.4
5118-74_2	33168.8	28902.9	27511.6	44899	24279.8	45193.5	35550.9	101463.1	34010.2	34390.2	34162.6	32804.7	22368.9	34848.4	39042.4	36069.2	43403.4	27350.4	28177.3	34181.1	25608.3	30924.6	34118.5	46546.1	45252.3	35384.3	33729.8	33654.3	36096.1	39997.6	42776.6	30230.7	32118.6	28654.6	38057	42903.8	29940.4	28613.7	29791.5	33109.3	33494.3	29532.1	48702.5	37022.2	35377.7	56407.5	32070.1	67139.3	31412.6
5275-28_2	905.1	2642.4	1065.6	783.6	773.7	1009.5	792.9	941.5	941.9	836.4	722	827.5	1132.4	1481.1	1428.1	934.2	652.7	862.2	998.8	824.3	902.4	706.7	1556.2	1212	1270.7	1067	1139.8	635.5	684.5	982.4	810.7	830.7	1902.1	806.1	842.7	1277.1	688.6	1039.5	941.8	1260.2	926	746.8	700.7	647.9	883.8	524.5	599.4	674.2	850.7
5358-3_3	5567.5	3167.1	30870.5	31201.2	5436.9	3729.1	3904.6	9741.6	4898.5	5557.1	3260.6	8368.7	3645.8	11770.6	58841.4	2761.5	6267.4	3560.2	15594.1	17294.9	4766.4	3376.5	53895.6	18026.7	7832.7	26048.6	7476.4	2126.3	5178.9	7165.4	6457.6	7216.7	1706.8	25810.6	9969	14315.5	4682.3	3109.8	9789.3	11800.4	3145.2	2459.3	3274.2	4278.4	1868.7	2861.9	4803.3	2392.3	4648.2
5359-65_3	298.3	240.7	277.8	347	298.1	318.2	299.3	338.6	319.3	313.9	329.9	290.6	333.7	391.2	398.4	350	841.7	269.3	275.1	307.7	295.1	400.2	321.8	327.6	585.3	266.7	299.5	272.3	298.7	325.1	452	331.8	345.6	388.6	406.2	319	275.6	316.1	439.6	1563.2	367.1	485.9	320.8	11910.9	436.1	343.7	508.6	292.4	306.6
5360-9_2	3612.9	15195	4697.1	1714.2	2719.7	8607.3	4175.6	1100.5	4216	3100.8	3079.5	4719.9	6894.8	5099	3244.4	3544.2	2082.1	4991.6	7867.8	4230.1	5287.8	2170.5	6642.5	1380.8	5965.1	4150.2	9022.6	4037.1	5888.6	3258.4	2436.2	3237	9498	3894.4	3823.7	3920.5	3588.6	4057.8	4188.3	7561.1	2860.7	1846.8	2561.3	2999.3	2148.7	1533.8	1009.1	3083.8	2705.6
5456-59_2	1901.9	2042.6	3149.9	2632.7	2383.2	2080.9	2157.7	2895.8	2432.7	1179.8	3286.7	2437.8	1479.6	1766.8	4398.6	1191	1870.7	2569.4	2558.7	2429.7	1676	2619.9	4060.6	1680.7	1302.3	3469.6	2652.6	1807	2493.7	2871.7	1300.6	1769.3	2074.1	2793.5	1471.8	2108.5	2893.8	1362	2986.8	2110.9	2733.8	1702.8	1863.2	3065.7	1573.4	782.2	1912.3	2551.5	1329.6
5462-62_3	16208.3	16947.1	12015.9	11060	19792.6	14744.2	17613.7	16438.8	14635.1	9254.3	19638.8	19582	16828.3	10465.7	18646.9	11369.8	23038.4	17354.3	19066.2	20957.5	22497.5	24986.3	15878.4	3429.4	18860.3	11491.3	16495.4	18524.4	19315.3	15001.5	16124.8	23606.5	17810.5	12716.4	12935.2	15993.3	18830	13019.6	15885.9	13242.5	9924.7	27735.7	15110.6	20095.3	18925.9	21234.8	18065.7	16333.6	26611
5463-22_3	4123.8	1999.1	5623.3	4920.1	5725.3	3953.8	5696.9	3799	4802.7	5942.6	3466.5	4153.6	4073.9	4110.5	6066	3141	4128.7	3744.4	4382.1	4617.9	4181.3	4490.3	6308.1	5323.3	4066.4	5128.7	5027.9	4179.1	4172.2	3955.4	4540.2	4732.2	3878.7	5826.2	4789.1	4919.3	4770.1	5885.7	5409.7	4478.5	3710.7	4496.9	4602.8	2749.8	3388.2	5271.2	2831.9	3481.6	4822.3
5467-15_3	18122.3	82820.5	15104.6	7609.7	8602.2	22585.9	8404.3	12375.4	16866.6	13136.1	9458.4	11480.7	22185.4	35673.1	11102.8	26391.5	15890.9	10329.5	20489.4	12685.4	19643.6	7748.2	15981.9	39343.5	44279.4	15416.8	25003.7	17026.8	16389.2	9996.2	9880.4	10029.9	145199.8	8771.5	15070.3	19497.9	14678.4	9504.2	12459.9	26570.4	12153.2	12496.8	14664.5	7016.1	14546.9	8013	9670.1	10744.7	9700.4
5475-10_3	6373.4	65157.3	6696.9	3013.3	3108.1	11013.1	4756.4	2206.3	11139	6471.1	3162.3	3999.6	21750.9	18572.4	2552.8	8036.8	5242.1	5071.7	22950.8	5811.1	12124.3	1805.5	7124	5240.8	25192.5	8011.2	10681.8	12993.5	8768.3	3759.6	2237.3	2245.7	60090	5123.1	5948.7	9414.9	11191.9	5829.9	10348.2	15471.5	7908.1	3607.9	3041.1	2331.6	2693.9	3188.7	995.1	2916.3	2679.4
5483-1_3	5380.1	7773.3	7943	7168	9612.1	8453.9	6699.5	6909.1	8804.1	5930.2	4505	8731.3	7540	11535.3	7244	5409.8	4780.8	7719.3	7940	8572.9	5902.7	9904.6	6807.5	5055.6	6397.3	6648	7127.8	4902.1	6039.2	7285.7	10533.5	6521.8	5535.5	8210.3	11038.8	9490.5	6320.5	4442.9	9463.1	8357.4	6073.9	5898.3	4774.9	5307.1	8618.7	5842.1	6038.3	6035.9	8525.8
5491-12_3	12464.9	5143.7	10001	9046	11093.2	9952	10476.3	7755.4	10079.7	8225.3	10656.8	9962.7	10122.4	11759.9	16161.6	7993.6	9088.6	8861.7	13286.6	9708.9	15608.6	12161.9	15634	5059.2	7150.5	9134.3	8039.5	7320.9	8585	10457.3	9391.9	12969	8091.5	11559.1	12132.3	9258.3	12112.5	9553.3	16176.9	10654.9	6626.5	6992	93153	5165.4	15008.1	9624.9	4425.3	8285.6	9061.7
5532-53_3	566.4	584.6	490.8	566.2	491	511.3	498.4	535.8	405.1	474.9	473.7	536.8	479.7	505.7	468.2	435.2	508.4	566.7	446.2	460.3	458.5	422.9	454.5	486.8	450.6	505.9	555.5	480.7	482.8	561.5	511	456.2	449.2	484.7	503.4	473.6	541.2	588.6	438.4	444.7	463.6	454.8	463.1	495.9	362	529.7	511.1	586.4	469.4
5581-28_3	1384.5	1793.7	377.5	540.3	377.9	462.1	296.1	563	693.3	606.3	296.1	545.2	399	564.8	342.4	459.7	1198.8	334.9	423.7	480.2	456.5	266.2	316.8	840.5	645.6	412.8	448.6	1268.7	362.5	383.9	515	605.2	2662.5	308.5	424.2	385.8	375	637.1	611.4	542.9	358.7	880.1	543.8	380.6	213.9	1483.8	1102.9	430.8	280
5609-92_3	430.5	3206.6	658.3	551.7	556.8	678.8	712.6	427	586.7	579.8	492.8	520.6	437.2	601.8	681.5	410.8	424.1	592.2	565.9	547	481.4	653.2	657.9	981.3	364.1	634.7	468.4	560.7	501.3	561.2	545.8	1273.9	1037.3	687	814.4	595.2	588.1	1223.2	586.7	438	481.1	408.9	554.3	833.4	354.1	565.7	7977.2	520.3	546.7
5682-13_3	2219.5	1945.4	2597.8	2456.9	2366.7	2425.4	2040.9	2108.8	2044.6	2448.9	2462.6	2198	2220.3	2223	2768.9	1950	2032.4	2456	2508.9	2725.6	2188.6	2912.9	2393.6	2170.1	1961.1	2779.5	2448.8	2035.8	2249.9	2440.1	2390.8	2877.2	2495.2	2575.3	2145	2211.2	2423.9	2175.1	2210.9	2567.7	2245.6	2862.7	2731.4	2650.1	2229.2	1824.7	1797.8	2283.5	2570.7
5759-10_3	3965.2	1381.4	5118.1	2381.3	2602.2	2515.2	2961.8	1946.1	1922.9	3225.9	1895.5	1991.7	21210.5	2628.6	1951	3432.4	2069.4	2157.2	2106.1	1729.1	49302.3	1880.9	2023.3	1914.5	1958.3	2210.9	1934	2234.7	2280.5	2594.8	1904.9	2530.2	1269.7	3074.4	2559.3	2420.9	2391.9	1881.8	2011.6	1575.1	2171.2	2423.4	1703.1	7302.9	2760	2218.7	1745.4	5864.3	1799.2
5858-6_5	60304.5	229383.8	44361.9	12111.8	16579.6	82519.1	16655.8	21345.5	51941.6	43017.1	18653.1	22584.9	93909.1	149900.2	12764.3	130115.9	41688.6	31200	69450.6	31159.9	80967	9968.1	40458.4	51111.9	232906.8	58532.6	73091.8	66524.2	46602.2	28356	13066.8	14297.7	162427.6	24912.7	38653	52284	47795.2	26496.6	46763.7	87817.5	38318.8	22122.6	18995.3	20405.2	18021.9	12412.8	12686.6	27318.9	20140.3
5960-49_3	5994.9	6025.7	6261.2	4628.2	5036.3	7286	7917.9	4765.1	6050.5	6658.3	11709.2	7198.5	3183.1	5028.6	3676.3	7117.5	8419.7	5305.7	5376.3	5803.5	4071.7	12319.3	3972.3	13906.1	9048.6	5648.4	8068.7	4751	5837.1	7699.9	7498.6	7902.6	5336.5	5585.2	4918.1	8353.5	8533.9	8635	9194.3	3684.7	6413.7	7726.4	6979.7	10536.8	6022.2	7193.3	8301.5	4911.6	8881.3
6115-40_3	1939.4	3269.7	1976.3	1639.2	1236	2389.5	2614.7	2033	3567.5	3206.2	2845.6	2386.2	1745.9	2956.6	1146.8	3778.1	3554.9	1936.3	2157.6	2265.3	1835.9	3577	1223	3978	3759.2	1939.7	2849.4	2756.6	2570.6	2694.6	2338	2298.7	4098.9	1652.6	2371.6	3034.2	2805	2164.6	3295.1	2052.1	1978.6	2264.3	3121.9	3345	2190.1	5230.5	2875.8	1769.2	2569.8
6340-10_3	3386.5	3965.6	3718.1	2350.2	2646.3	4022.9	3969.7	2391	3326.1	4234.5	6183	4207.5	2100.6	3243.3	1870.7	3994.4	5056.5	2978.9	3114.7	3096	2221.5	6591.4	1983.7	6973.7	5730.5	3276.8	4967.8	2901	3526.1	4758.6	4607.7	4433.4	3438.5	3448.9	2656.7	4759.9	4878.2	4618.1	5656.2	2349.8	3400.9	4245.9	3473.1	4612	3450.2	4309.4	4502.6	2880.9	4343.4
6390-18_3	3246.5	3036.7	3053.2	3056.6	2992.9	3785.4	3817.8	3646.2	3571.6	3033.8	2768.4	3690.5	4167.3	3549.7	3111.8	2100.9	2955.3	4330.5	3243.3	4227.1	3008.9	4426.8	3075.8	1702.8	1639.3	2565.9	4359.4	2913.3	3216.6	4087.7	3940.7	4169.8	2029.4	4454.7	2985.7	10712.3	5957.7	2902.7	4237.9	3431.7	4860.2	2202	3470.8	4199.9	3737.1	3441.8	2658.1	3438.7	4400.9
6522-57_3	8595.1	7638.7	8899.3	6518.7	7463.2	10055.3	9775.4	6273.9	9990	12218.9	15180.2	10489.7	5196.6	6789.7	5278.8	10462.7	10827.7	7986.2	7763.7	9014.5	5304.6	15509.2	5535.4	15320.3	10945.2	8683.1	10807.8	7057.1	9001.9	10629.4	11746.7	11134.1	7336.8	8486.5	7662.3	11585.6	12132.7	12588.2	12454.6	6156.1	9369.2	11783	11459.5	25422.4	8965.3	10413.2	11894.7	7211.3	12932.1
6568-18_3	1261.5	847	706.9	800.8	600.3	616.4	763.3	615.1	632.6	630.9	646.8	1060.5	791.2	727.5	597.8	1048.1	1098.6	622	750.4	976.9	678.8	3027.8	605.6	988.9	998.1	742.9	746.6	768.3	1123.1	1009.5	509	592.8	1444.9	632	707.1	713	707.2	1341.2	730.3	635.1	687.7	1092.9	782.9	1695.1	933.9	942.5	855.6	585.1	764.9
6575-79_3	876.7	820.1	2501.1	920.9	757.2	1500.3	1057.2	1739.8	890.6	1324	774.5	795.7	843.8	681.2	912	964	1034	844	883.4	956.7	1088.6	1142.4	796.7	1566.5	846	2559.6	845.8	6421.2	864.5	1019.6	1138.7	934.4	770.1	929.7	784.2	1451.5	1095	989	884.9	17958.4	897.5	921.9	1051.8	1270.5	1050.6	1023.8	1966.8	1063.9	881.8
6576-1_3	1604.4	1154.2	988.2	1374.8	1276.6	1239.6	1524	1427	1670.9	2292.1	1721	1543.2	1275.6	1040	1529.7	1355.9	1299.3	1207.5	1463.3	1006.3	1325.9	1053	1348.3	2444.4	1351.9	940.7	1412	1177.5	1621.3	950.9	1086.8	1068.4	2073.4	1263.8	1393.4	1242.5	1585.7	1102.8	1190.5	883.5	1692.6	2100.9	1326.8	827.3	1329.9	1329.7	1760.9	2232.4	4370.1
6580-29_3	337.4	624.3	258.4	286.9	246.9	253.6	344.7	180.3	244.2	198.7	234.4	314.4	394.3	246.5	198.4	290.5	302.5	355.6	261.9	340.2	484.1	226.4	223.2	250.4	226.7	274.8	340.3	511.9	161.5	412.4	226	243.7	329.6	498.8	206.5	231.9	182.1	527.2	333.4	168.8	346.8	745.3	259	257.5	1048.7	313.9	411.4	433.2	204.3
6606-61_3	176.2	151.1	146.9	172.3	154.4	171.3	163.2	264.6	178.2	163.3	168.6	361.9	152.8	171.2	173.2	162.6	172.7	187.9	146.6	147.2	137.4	156.3	172.5	189.3	170.8	168.4	174.4	170.9	172.3	185.3	174.6	163.4	162	155.3	167.9	177.7	167.7	211.5	145.3	166.9	166.1	151.5	193.5	198.5	142.1	207.7	579.5	240	146.7
6921-24_3	263.9	185.8	276.9	227.8	243.3	211.2	221.7	254.6	221.7	229.9	483.3	211.1	242.7	185.8	236.2	207.9	254.5	292.4	234.8	428	237.7	235.8	214.6	245.6	189.9	279.2	228.7	233.5	216.8	249.6	204.2	287.8	175.2	264.3	206.9	200.4	222.5	217.9	267.5	179.1	218.4	251.3	630.3	262.7	219.4	278.6	610.5	244.1	602.7
7191-32_3	1351.9	8195.3	1162.5	1040.4	767.6	2053.1	512	819.5	767.2	850.9	615.1	1430	1450.3	2232.3	527.7	4584.3	2099.8	1001.8	1279.8	703.5	1281	451.1	1740.2	1743.5	5234.9	2626.2	2633	1397.1	1716.2	848.9	496.4	446.1	3001	704.3	1264.6	3163.1	822.6	903.3	933.7	1734.3	1476.1	782.8	963.6	559.9	666.6	764.1	403.5	1359.3	731.6
7203-125_3	1665.3	1755.5	1239	1913.9	1418.8	1832.2	1808.1	1576.9	1544.6	1653.2	1194.9	1434.9	2071	1538.2	1240.6	1717.9	1275.2	1358	1538.2	1218.8	1666.2	1574.9	1091.9	1111.3	1556.1	1174.1	1308	1867	1338.7	1396.2	1281.6	1270.1	1771.4	1787.1	1456.4	1570.7	1441.6	1574.3	1780.6	1234	2511.8	1610.7	1205	1574.1	1853.5	2957.1	906.6	1585.2	1505.4
7251-64_3	1215.1	952.2	758.8	3262.8	878.9	1720.5	1410.9	945.6	1122.5	1155.8	1040.8	1306.9	2044.1	1495	1115.2	3468.3	863.9	1037	915.7	876.2	1012.9	1761.4	1082.5	646.4	821.3	820.7	971.2	552.6	1213.5	1296	1010.2	997.1	399.5	3061.1	1269	2260	1759.9	1208.9	2515.4	981.2	4393.2	1229.7	1066.4	1026.7	1173.3	1647	1323.5	1591.1	1394.2
7625-27_3	4456.1	14969.2	14275.8	4520.8	4591.2	6419.3	5161	5530	4351.7	5903.7	3980.5	3737	5364.8	11022.3	3319.5	15378.5	4167.9	3413	6222.7	5858.3	6211.4	5833.6	5294.9	12280.1	17229.9	17484.3	7832	5512.1	5113.6	3495.7	4365.2	4310.6	10610.3	2733.8	4420.4	4745	4269.7	4822.7	4571.3	9152.5	4338.8	5399.7	5640.5	1548.4	5763	2837.4	2169.4	4234.3	4391.8
7796-10_3	1129.3	767.3	957.9	1742.4	1019.8	1123.1	1182.3	1224.3	978.8	1036.5	1155.3	1190.2	2182.3	1039.9	1007.7	1250.1	1094.8	917.9	1274.4	914.6	1104	781.7	944.2	967.1	1219.5	986.1	883.6	2010.9	1152.4	1053.7	968.9	976	948.5	1235.5	1001.8	1147.9	1168.3	993.7	1342.5	1198.9	1586.4	1256.6	1057.8	684.2	1052.8	1392.3	1301.4	1079.5	1250.7
7885-17_3	1686.8	2089.7	1169.8	1152.5	891.7	703.5	2606.1	982.1	1684.7	923.5	856.9	2052.6	1203	728.8	903	1133.6	1493.8	696.9	2189.8	1774.1	1860.8	919.8	1598.7	433.9	957.6	906.3	1992.2	1828	1406.2	1532.7	1378.5	1153.8	2054.1	1317.3	841.2	561.3	1110.8	2002.5	1081	1145.7	1109	895.9	1504	1027.2	1058.9	1121.1	2943.6	1005.5	1625.2
7926-13_3	659.5	308.4	998.9	1803.4	1757.4	803.2	1675.1	570.9	464.8	456.3	528	591.5	614.3	443	972.5	679.8	578.2	2453.3	1806.3	2035.3	562.5	958.2	1063.2	550	372	960.1	2698.8	437.2	572	625.9	435.7	441.1	300.4	4401.3	521.4	826.6	831.7	464.3	706.1	619.6	955.5	454.8	446.4	310.8	535.9	635.4	607.6	508.1	1842.4
8005-1_3	1006.7	867.9	1731.6	1338.5	2383.4	1420.9	1794.3	1039.3	1688.3	2474	1119.9	1926.3	1610.8	1055.1	1819.9	1130.5	1053.8	1893.7	1677.9	1433.4	1413.3	1583.7	1920.3	2243.9	985.6	1460.8	1946.2	1252.7	1859.5	1316.1	1668.8	1637	963	1783.1	1360	1721.7	1688.8	2094	1666.8	1246.7	1166.3	2538.2	1360.3	985.3	1250.8	1672.5	1074.3	1670.5	1458.4
8262-20_3	8354.8	15745	6847	12251.7	7237.6	9038.1	6983	13536.4	7563.3	7600	6037.4	8135.3	8360	7620	7660.6	17835.6	6467.5	8161.6	6885	4903.1	9380.5	6830.3	6873.8	13448.2	6922.4	6313.6	7997.8	6435.1	9599.8	10718.7	9059.3	8191	11186.6	15450.1	6596	9456.9	17392.8	10070.5	8096.7	9514.5	18194.6	6331.7	13475.4	8703.4	7120.9	8390.3	8939.6	11111.1	9651
8288-27_3	130327.5	88597.7	108603.2	105716.5	114187.9	123978.7	110705.6	106402.4	119673.8	99879.1	111092.1	127295.7	108736.2	103165.6	125943.8	197747.8	104917.3	112725.7	123615.9	113743.7	112529.1	189322.3	110908.6	111277.8	111001.8	102493.8	140442.2	109879.1	135013.7	117986.1	125495	117393.5	95868.4	120453.4	124068.4	103194.9	143398.3	155265.6	130186.5	124527.3	91671.3	79666.5	103093.2	102159.8	130934.5	93833.5	106712.6	107827.5	169959.5
8468-19_3	474.7	250.9	1884.9	1182.8	917.3	426.6	2317.8	366.9	375.7	345.4	382.6	2303	439.7	259	2007.8	713.9	494.4	2295.2	2481.7	2223.6	545.8	1891.1	1758.7	2238.8	381.7	1536.8	1360.9	436.8	2873.9	429.2	623.4	502.5	355.7	2037.3	325	4023.6	2101.2	338.3	367.6	1396.2	407.2	479.2	378.3	315.9	473.7	2324.9	367	435.6	1907.6
8484-24_3	3199.3	2634.1	2356.2	1710.8	1962.3	3965.1	1771.4	6323.5	29001.3	2735.3	12284.3	1666.1	6982.3	3875.7	2684.1	1533.1	1878.2	1941.2	2061.8	2424.4	5866.4	2321.9	2558	1487.7	2335.8	1991.8	2716.2	1604	1390.7	8317.2	3293.5	4834.7	1306.2	2088.4	3280.2	2711	3758.2	9386.9	8281.8	1980.7	2778.9	4683.6	3079.3	5024.1	5681.2	1236.3	3552.9	6398.4	2409.9
8840-61_3	4708.4	4922.3	4648.4	4154.7	4337.2	3677.7	5820.4	5027.6	4981.9	5199.8	3226.3	2411.2	3762.1	3240.5	4435	731.7	5640.3	4470.5	5448.5	3449.4	4654.1	4821.6	4208.1	4895.8	5476	4388.7	4229.8	4670.8	2924.9	4733.6	4207.4	5065.3	5376.3	4531.1	3515.7	3963	3872.4	2813	5269.6	4090.2	4330.7	4935.1	4855	5229.4	4563.5	4256.1	4976.5	4314.3	4145.2
8973-23_3	465.8	386.4	741.5	823	625	842.7	400.5	453.1	375.6	468	783.8	396	769.7	520.4	703.6	399.5	366.7	564.8	995	545.2	535.4	424.2	868.4	324.1	474.8	840.5	369.9	371.6	377.3	409.9	473.8	678.8	696.5	439	677.6	690.8	537.8	484.6	1137	497.7	554	463.5	592.7	675.7	391.8	584	484.7	443.2	407.1
8974-172_3	3772.7	2224.9	7027	4021.7	6251.4	5186.7	5051.1	4794	6613.2	4812.5	4121.4	6108.8	3351.5	3795.3	5998.8	3918.3	2488.1	4327.2	5911.4	4876	3620.1	5057.8	8530.4	6157.8	3275.3	6551	6621.3	2464.9	4381.8	4053.2	4417.3	3464.3	1570.7	6596.2	3241.3	6887.4	4081.1	3425.8	6530.7	4604.5	3066.7	3117.8	2859.5	3207.9	3739.6	4461.9	3632.4	3796.4	5503.6
9070-1_3	274.4	415.6	281.5	321.2	239.7	310.3	1483.3	390.9	261.3	816.6	230.1	310.1	252.3	318.4	258.9	438.9	310.6	305.2	232.2	217.8	252.7	561.7	249.2	250	285.8	301.5	261.7	273.5	332.3	285.2	540.8	210.5	286.5	247.9	268.8	267.4	325.7	376.3	258.7	816.4	372.9	289.7	269.9	1025.8	311.9	297.4	340.7	588.8	286.9
9182-3_3	2008.4	1977.4	3170.4	2526	2018.7	2573.5	2593.9	2372.9	2440.3	2845.6	2199.7	1766.8	2074.5	2122.6	3505.6	2248.3	3116.2	1851.6	2403.5	2218.5	2351.6	2448.6	2973.9	1914.7	2692.7	2513.6	2261.3	1836.2	1834.6	2784.5	1976	2366.9	2057.8	2839.9	2425.9	2108.7	2327.2	2511.2	2591.9	2190.7	2126.1	1704.5	2095.7	2660	2049.3	2174.1	1469.4	2345.3	2500.9
9196-8_3	1897.6	1272.7	1387.9	2631.2	1491.9	1764.6	1776.6	2094	1227.5	1545.1	1394.4	1735.5	1618.3	1419.4	1180.8	1968.6	1605	1272.1	1321.3	1013.7	1396.8	1255.3	1323.6	1245.9	1469.1	1423.3	1375.1	1388.1	1792.1	1666.1	1114.2	1510.4	1463.8	1791.7	1443	1926.4	1434.9	2047.2	1425.7	1419.2	1817.8	1630.5	1403.8	633.2	1394.4	1908.9	1121	1223	1246.4
9211-19_3	15426.6	13918.8	16758.4	18670.7	19952.8	18003.1	14483	16833	16162.6	14337.9	16073.9	15470.3	15705.7	15858.7	16176.1	15343.4	15117.3	18685.7	17849.1	19489.7	14369.7	18081.1	15277.4	19791.5	14449.3	16673.1	20495	12891.2	14971.1	16048.4	16950.7	14859.3	14314.7	18613.3	16720.2	18565.2	22092.5	16335.1	16611	17698.2	11280.1	12484.4	9836	15617.5	12667.6	16316	16020.8	15211.1	16663.9
9302-90_3	169.5	109.3	177.1	155.7	271.3	212.9	173.7	188.6	245.3	200	209.5	173.9	168.3	273.5	217.8	252.2	216.9	184.5	179.1	187.9	201.2	313.9	185.6	278.3	305.3	152.3	158.7	173.4	165.1	203.9	219.2	175.5	179.8	189.3	236.3	320.6	194.6	191.7	190.8	179.8	184.6	255.6	203.9	403.8	174.7	244.9	97.6	157.5	203.9
9370-69_3	4793.8	4774.7	7082.9	4902.2	2973.2	3850.1	4731.2	4661.3	6501.4	4767.1	5500.8	4957.8	5351.9	4311.5	8288.8	4215.7	6039.1	4301.4	5287.2	4883.3	4431	4641.9	7724.2	4153.1	4052.5	5721.3	3534.4	4982.2	4378.4	4592.6	3709.5	4572.5	4534	5296.5	4363	5859.6	4303.4	3810.4	4432.7	4342.5	4142.5	4638	4990.2	6086.3	4337.1	4363.7	5751.2	3623.1	3961.2
9870-17_3	4620.9	7688.3	8519	6062.3	5958	6588.7	3981.3	4511.7	6961.9	8846.1	4398.8	5830.7	6398.5	5193.6	5791.1	9469.4	9477.9	5147.3	5152.9	7043.1	5393.9	4882	7016.9	8960.9	6401.9	8425.1	4646.1	8360.3	5424.2	6840.6	6115.7	4711.8	36507.3	4671.2	5787.9	8136.1	5428.2	3600.4	5249	5309.8	5333.7	5641	9279.7	4490.4	5062.4	8255.1	6309.1	7121.5	4584.1
9876-20_3	1315.9	1893.6	2149.2	1343.8	1762.1	2164.9	1228.8	2146.6	3414.5	1690	1602.1	2044.1	1779.8	1765.4	2534.9	1297.5	1320.6	1746.2	2422.2	1989.8	2629.7	2121.8	2224.8	857	1473	2154.6	2545.5	899	1942.7	1876.9	2536.3	2256.1	2433.3	1586.2	1986.3	2101.7	1727.7	1503.5	2704.1	1507.4	2183.4	1596.5	1526.2	2588.5	2115.6	622.1	1378.1	2180.9	1678.3
9887-40_3	3464.2	4471.3	3339.3	3527.9	2071.3	3622.8	2624.1	3492.5	1930.3	2859.9	2308	2745.8	3979.6	4311	1861.2	4135.4	2802	2403.2	2889.2	3119.8	3259	1596.8	2604.2	2189.1	4704.1	3774.2	3221.2	2843.7	2970.7	2495.6	2063.8	1904.9	4155.9	3017.8	2940	3319.3	2821.1	2395.2	3057.5	157379.4	3776.6	3611.8	2112	2682.3	2559.4	2866.5	3087.6	3035.9	2168.2
9896-21_3	96.7	164.3	135.7	94.3	118.3	95.9	131	110.7	111	102.5	121.1	111.4	112	109.3	118.3	114.2	160	117.9	115.6	136.9	102	131.5	113.3	113.1	118.2	160.6	107.8	133.2	122.2	694.8	112.8	118.3	86.9	119.6	114.9	105.2	111.8	108	107.1	91	185.5	106.8	141.8	335.7	104.4	138	265.9	112.9	103.1
9999-1_3	2189.2	5325.6	1666.1	1714.4	2066.8	2945.1	1669.2	1970.8	2723.1	1440.4	1458.9	2136	2881.8	2754.4	2191.9	2394.8	1210.3	1698.7	3341.8	1541.5	3217.6	2471.1	1858	1733.9	4208	1519.3	2060.6	2365.7	2026.9	2107.4	1701.4	2196.7	8783.9	1770.8	1854.9	1972.1	1935	1684.3	2468.1	2785.5	2086.5	1387.1	1209	1675.9	2351.2	2139.5	1247.9	1437.8	2161.9
[truncated: 205 more columns]
