# Supplementary material for: Discovery and validation of a prognostic proteomic signature for tuberculosis progression: A prospective cohort study
Source: PLoS Med. 2019 Apr 16;16(4):e1002781. doi: 10.1371/journal.pmed.1002781 (PMC6467365; doi:10.1371/journal.pmed.1002781)
Supplement: S7 Table — ACS, Adolescent Cohort Study; bhFDR, Benjamini–Hochberg False Discovery Rate. (XLSX) [file pmed.1002781.s013.xlsx]

## Sheet: S7_Data. Train+test_prot rank
S7 Data. Differential protein abundances between progressors and non-progressors in the training and test sets (combined) from the Adolescent Cohort Study, ranked by ascending Banjamini-Hochberg false discovery rate (FDR).
SOMAmer	Target	logFC_mean	logFC_median	KS_dist	p_val	FDR	Bonferroni
2292-17_4	C9	0.347184	0.271478	0.428043	1.07486e-10	3.087e-07	3.087e-07
6522-57_3	AMBN	0.324208	0.416121	0.411051	6.76899e-10	9.72027e-07	1.94405e-06
2567-5_6	Factor I	0.155687	0.148173	0.400748	1.99225e-09	1.90724e-06	5.72173e-06
6340-10_3	GPHB5	0.265967	0.393409	0.393727	4.09263e-09	2.80029e-06	1.1754e-05
3060-43_2	C9	0.236066	0.211132	0.39194	4.90539e-09	2.80029e-06	1.40883e-05
3714-49_2	CK-MB	-0.885079	-0.626052	0.390195	5.85018e-09	2.80029e-06	1.68017e-05
4924-32_1	MMP-1	0.517918	0.59741	0.388492	6.94248e-09	2.8484e-06	1.99388e-05
6115-40_3	DIAC	0.340831	0.458575	0.376485	2.27159e-08	8.15501e-06	6.52401e-05
5960-49_3	SG1C1	0.336016	0.356684	0.371251	3.76464e-08	1.20134e-05	0.000108121
8974-172_3	COFA1	-0.197337	-0.218724	0.369672	4.37812e-08	1.25739e-05	0.000125739
2670-67_4	CK-MM	-0.43158	-0.27522	0.365891	6.26843e-08	1.63663e-05	0.000180029
8802-24_3	UB2J2	0.218981	0.322338	0.364437	7.18923e-08	1.72062e-05	0.000206475
4141-79_1	IP-10	0.336764	0.251349	0.360698	1.02013e-07	2.09272e-05	0.000292981
5073-30_2	DR3	0.169877	0.195733	0.360823	1.00836e-07	2.09272e-05	0.000289601
10639-1_3	2DMA	0.292073	0.309801	0.357665	1.35136e-07	2.50124e-05	0.000388111
3700-15_4	IgG	0.168092	0.16624	0.357333	1.39345e-07	2.50124e-05	0.000400199
2811-27_1	Angiopoietin-1	0.113653	0.101893	0.355297	1.68037e-07	2.83884e-05	0.000482603
7843-152_3	CEND	0.214775	0.262622	0.352223	2.22498e-07	3.55008e-05	0.000639014
5481-16_3	RASA1	-0.30229	-0.329084	0.350644	2.56757e-07	3.88108e-05	0.000737405
4337-49_2	CRP	0.971038	1.16357	0.348899	3.00566e-07	4.31613e-05	0.000863225
4482-66_2	C5b, 6 Complex	0.141167	0.126275	0.345658	4.01879e-07	5.49618e-05	0.0011542
2381-52_4	C5	0.177811	0.156357	0.342335	5.39838e-07	7.04734e-05	0.00155042
2692-74_2	NPS-PLA2	1.05069	0.844232	0.338637	7.47129e-07	8.58302e-05	0.00214575
10427-2_3	KCNE2	0.435152	0.374808	0.338679	7.4442e-07	8.58302e-05	0.00213798
4673-13_2	IL-6	-0.0972711	0.197473	0.338845	7.33681e-07	8.58302e-05	0.00210713
6277-55_3	ISM2	0.218546	0.235257	0.336726	8.8255e-07	9.74878e-05	0.00253468
4544-4_3	CTAP-III	0.447641	0.518194	0.334774	1.04528e-06	0.000103519	0.00300205
7251-64_3	C1QT3	-0.268934	-0.168186	0.33548	9.8333e-07	0.000103519	0.00282412
8973-23_3	FCRL4	-0.244116	-0.40979	0.335064	1.01933e-06	0.000103519	0.00292751
3449-58_2	Kallistatin	-0.179191	-0.0945494	0.333236	1.19341e-06	0.000114249	0.00342747
6934-8_3	DB131	0.000926209	0.30804	0.329954	1.58049e-06	0.000146425	0.00453917
5028-59_1	sCD163	0.279064	0.260849	0.328085	1.85245e-06	0.000157583	0.00532025
7034-4_3	SGCB	0.234578	0.176286	0.328459	1.79468e-06	0.000157583	0.00515433
8923-94_3	GLTL1	-0.131304	-0.192119	0.328002	1.86553e-06	0.000157583	0.00535781
6911-103_3	CLC6A	0.172238	0.166727	0.324636	2.47688e-06	0.000203245	0.00711359
4129-72_1	Factor B	0.165039	0.156139	0.323141	2.80678e-06	0.000223919	0.00806108
4907-56_1	D-dimer	0.219671	0.203072	0.321479	3.22294e-06	0.00025017	0.00925629
2474-54_5	SAP	0.201825	0.188946	0.314666	5.63892e-06	0.000408993	0.016195
10627-87_3	APLP2	0.0917351	0.1119	0.314541	5.69628e-06	0.000408993	0.0163597
5360-9_2	PKB beta	-0.168238	-0.206951	0.314541	5.69628e-06	0.000408993	0.0163597
8228-10_3	CK083	0.542098	0.202121	0.311051	7.55026e-06	0.000516294	0.0216844
9999-1_3	IRF6	-0.306816	-0.275869	0.311259	7.42534e-06	0.000516294	0.0213256
7059-14_3	LIRA6	0.357671	0.432187	0.309182	8.76912e-06	0.000570905	0.0251849
2790-54_2	NAP-2	0.330057	0.389132	0.308932	8.94524e-06	0.000570905	0.0256907
8578-45_3	AMELX	0.145112	0.243067	0.309265	8.71115e-06	0.000570905	0.0250184
4989-7_1	Fibrinogen g-chain dimer	0.155583	0.119941	0.307146	1.03105e-05	0.000643736	0.0296119
7113-1_3	GRPE1	0.287995	0.258861	0.303947	1.32695e-05	0.000747255	0.03811
3311-27_1	FCG3B	0.239032	0.239802	0.304238	1.297e-05	0.000747255	0.0372499
6390-18_3	NPS	-0.114858	-0.0887193	0.304155	1.30549e-05	0.000747255	0.0374937
6324-11_3	DNSL2	-0.153686	-0.152533	0.303947	1.32695e-05	0.000747255	0.03811
8885-6_3	CA2D3	-0.228862	-0.256429	0.304113	1.30976e-05	0.000747255	0.0376162
4956-2_1	EPI	0.508144	0.339182	0.302077	1.53589e-05	0.000832277	0.0441107
8828-21_3	ESRP1	-0.116528	0.0919094	0.302202	1.52103e-05	0.000832277	0.043684
6389-57_3	CUED2	0.189986	0.341099	0.300831	1.6923e-05	0.000900055	0.048603
5654-70_3	TMX3	0.131111	0.149112	0.298463	2.03247e-05	0.00106132	0.0583726
7886-26_3	SPTC1	0.577534	0.224828	0.296967	2.28003e-05	0.00110987	0.0654825
7201-5_3	ISCU	0.152222	0.0887826	0.297216	2.23686e-05	0.00110987	0.0642426
4562-1_2	NXPH1	0.0909179	0.0867662	0.297092	2.25835e-05	0.00110987	0.0648597
6388-21_3	CC126	-0.214949	-0.271426	0.297424	2.20148e-05	0.00110987	0.0632265
7817-36_3	CCNC	-0.0401941	0.118205	0.295721	2.5081e-05	0.00120055	0.0720327
5620-13_3	AMD	-0.111969	-0.113056	0.295305	2.58886e-05	0.00121889	0.074352
7057-18_3	SHSA3	0.237838	0.283949	0.292189	3.27879e-05	0.00148548	0.0941669
9188-119_3	MIG	0.43317	0.282946	0.29194	3.34099e-05	0.00148548	0.0959533
3194-36_2	GPVI	0.21661	0.258266	0.291857	3.36197e-05	0.00148548	0.0965559
9269-7_3	Biotinidase	-0.109163	-0.14753	0.292189	3.27879e-05	0.00148548	0.0941669
4867-15_2	VEGF121	0.135332	0.217455	0.290237	3.79716e-05	0.00158543	0.109054
8770-136_3	SLAF5	0.32373	0.189665	0.29032	3.77359e-05	0.00158543	0.108378
8832-55_3	BST-2	0.294411	0.126927	0.290195	3.80899e-05	0.00158543	0.109394
3707-12_2	Albumin	-0.178036	-0.0942384	0.290694	3.66926e-05	0.00158543	0.105381
3600-2_3	Chitotriosidase-1	0.382506	0.305663	0.288783	4.23302e-05	0.00167572	0.121572
10701-30_3	Cadherin-12	0.0441971	0.170663	0.2887	4.25932e-05	0.00167572	0.122328
3389-7_2	PCI	-0.129205	-0.0868787	0.288907	4.19387e-05	0.00167572	0.120448
5470-69_2	MED-1	-0.11987	-0.151092	0.288949	4.18089e-05	0.00167572	0.120075
9250-87_3	HNP-1	0.430271	0.314015	0.286955	4.84888e-05	0.00181973	0.13926
8362-102_3	IgJ	0.145675	0.13282	0.286872	4.87881e-05	0.00181973	0.140119
10447-18_3	PABP3	-0.143869	-0.126377	0.286872	4.87881e-05	0.00181973	0.140119
2937-10_2	Apo E3	-0.161057	-0.154761	0.287038	4.81912e-05	0.00181973	0.138405
4151-6_2	Plasminogen	0.103012	0.0860595	0.286664	4.9544e-05	0.00182424	0.14229
8429-16_3	AXIN2	-0.18921	0.287617	0.285251	5.49886e-05	0.0019676	0.157927
6565-68_3	CDCP1	0.150805	0.263598	0.28521	5.5157e-05	0.0019676	0.158411
6121-5_3	RNAS7	0.753484	0.108391	0.284961	5.61781e-05	0.0019676	0.161344
3204-2_2	LKHA4	-0.396072	-0.245835	0.285044	5.58358e-05	0.0019676	0.16036
2986-49_2	Gro-b/g	0.197346	0.171504	0.283548	6.2313e-05	0.0020873	0.178963
8369-102_3	DAG1	0.44241	0.126251	0.283506	6.25027e-05	0.0020873	0.179508
2654-19_1	TNF sR-I	0.158858	0.0776498	0.283797	6.11859e-05	0.0020873	0.175726
5030-52_1	SIRT2	-0.218024	-0.190606	0.283506	6.25027e-05	0.0020873	0.179508
8043-153_3	COMP	-0.191116	-0.194129	0.281762	7.09879e-05	0.00234342	0.203877
9870-17_3	SYWC	0.353107	0.19427	0.280266	7.91225e-05	0.00254256	0.22724
9795-9_3	CLN5	0.136877	0.161472	0.2801	8.00792e-05	0.00254256	0.229987
3666-17_4	complement factor H-related 5	0.205703	0.160143	0.280017	8.05616e-05	0.00254256	0.231373
8368-102_3	TNF sR-II	0.115641	0.143755	0.280266	7.91225e-05	0.00254256	0.22724
7090-17_3	GALT1	0.0857113	0.0492029	0.279767	8.20256e-05	0.00256063	0.235578
8353-15_3	SCN2B	-0.198651	-0.135526	0.278521	8.97328e-05	0.00274162	0.257713
5109-24_3	Nr-CAM	-0.0990652	-0.140126	0.278521	8.97328e-05	0.00274162	0.257713
8459-10_3	BMP-6	-0.242783	-0.253859	0.278272	9.13547e-05	0.0027618	0.262371
6956-37_3	FAF2	0.0255794	0.113903	0.276735	0.000101988	0.00303767	0.29291
7210-25_3	Amyloid-like protein 1	-0.294486	-0.40257	0.276651	0.000102595	0.00303767	0.294654
7648-9_3	MYPC1	-0.861435	-0.419031	0.276194	0.000105996	0.00310633	0.30442
10497-242_3	COX8A	0.215549	0.215799	0.275073	0.000114802	0.00333041	0.329711
6933-20_3	RM34	0.225564	0.0941568	0.274657	0.000118236	0.00339574	0.339574
10476-23_3	MCFD2	0.139251	0.206646	0.273162	0.000131424	0.00370049	0.37745
5424-55_3	RANK	0.0544592	0.140921	0.273286	0.000130274	0.00370049	0.374147
4149-8_2	PDGF-BB	0.497705	0.578908	0.272912	0.000133753	0.00372951	0.38414
5581-28_3	FGL1	0.44402	0.311898	0.272663	0.000136122	0.00375905	0.390942
3059-50_2	BAFF	0.260325	0.187061	0.271458	0.00014814	0.00398784	0.425458
8031-11_3	CEACAM1	0.102705	0.179887	0.271417	0.000148572	0.00398784	0.426698
9231-23_3	IMPA3	-0.135324	-0.17314	0.271583	0.000146852	0.00398784	0.421758
5675-6_3	PRELP	0.168443	0.151178	0.269464	0.000170269	0.00452788	0.489011
9377-25_3	SCF	-0.157148	-0.175031	0.268093	0.000187259	0.00493402	0.537809
7879-12_3	Cytochrome P450 3A4	-0.0298941	0.145501	0.267885	0.000189969	0.00495993	0.545592
9723-105_3	EMILIN-3	1.13137	0.122723	0.266514	0.000208809	0.00535447	0.599701
2973-15_2	CD36 ANTIGEN	-0.137906	-0.235216	0.266597	0.000207619	0.00535447	0.596282
4878-3_1	Coagulation Factor X	0.0794353	0.134642	0.266348	0.00021121	0.00536809	0.606594
2418-55_9	Apo E	-0.189339	-0.206153	0.266057	0.000215473	0.0054284	0.618837
9772-153_3	NLGN2	-0.247874	-0.0432747	0.265767	0.000219817	0.00548969	0.631314
4916-2_1	IgD	0.211073	0.660995	0.264063	0.000246971	0.00576668	0.709302
10089-7_3	ASML	0.770485	0.248008	0.264396	0.000241436	0.00576668	0.693404
5256-86_3	PDE5A	0.282483	0.16879	0.264271	0.000243498	0.00576668	0.699326
9796-4_3	CEL	0.234932	0.16029	0.264312	0.000242809	0.00576668	0.697346
7161-25_3	G6PE	0.172771	0.148995	0.264769	0.000235349	0.00576668	0.675921
8979-1_3	DHB2	0.044086	0.0855111	0.264146	0.000245576	0.00576668	0.705295
7930-3_3	EXOS1	0.0772495	0.0794731	0.264105	0.000246273	0.00576668	0.707296
2976-58_2	Desmoglein-1	-0.108208	-0.0685724	0.264312	0.000242809	0.00576668	0.697346
4160-49_1	MMP-2	-0.179958	-0.12749	0.263149	0.000262818	0.00608722	0.754815
8777-5_3	TGFB1I1	0.339784	0.1063	0.262734	0.000270335	0.0061793	0.776401
3344-60_4	Antithrombin III	-0.0684713	-0.0770722	0.262692	0.000271097	0.0061793	0.778592
5606-24_3	MFAP1	-0.00805824	0.128917	0.262443	0.000275716	0.00618639	0.791857
2797-56_2	Apo B	-0.342526	-0.198347	0.262443	0.000275716	0.00618639	0.791857
8814-33_3	SAPL1	-0.184109	-0.195901	0.262318	0.000278054	0.00619047	0.79857
6049-64_3	PTPRS	-0.139491	-0.0874277	0.261404	0.000295773	0.00653432	0.849461
3590-8_3	C1s	0.11961	0.111592	0.261197	0.000299947	0.00657593	0.861447
9941-70_3	PCDB1	0.0983462	0.0741667	0.260781	0.00030846	0.00671134	0.885897
7790-21_3	LIF	0.411655	0.088881	0.260656	0.000311058	0.00671699	0.893359
4499-21_1	PDGF-AA	0.349078	0.321605	0.259119	0.000344846	0.00708289	0.990399
2421-7_3	BDNF	0.292308	0.190969	0.259202	0.000342935	0.00708289	0.984909
9492-5_3	RRBP1	0.461004	0.147343	0.259078	0.000345806	0.00708289	0.993155
5093-47_3	JAG2	-0.0790792	0.1356	0.259036	0.000346768	0.00708289	0.995918
2652-15_1	suPAR	0.1292	0.108345	0.259659	0.000332599	0.00708289	0.955224
3710-49_2	Angiostatin	0.098548	0.103541	0.258995	0.000347732	0.00708289	0.998688
5312-49_3	Apo E2	-0.108792	-0.0728713	0.259036	0.000346768	0.00708289	0.995918
5491-12_3	Testican-2	-0.120214	-0.162108	0.259369	0.000339142	0.00708289	0.974016
4922-13_1	MIP-3b	0.228661	0.212224	0.257541	0.000383128	0.00750604	1.10034
3808-76_2	FGFR-2	0.348035	0.166546	0.257499	0.000384188	0.00750604	1.10339
3520-58_1	TGF-b3	0.19285	0.0997742	0.257499	0.000384188	0.00750604	1.10339
8957-72_3	XTP3B	0.186307	0.0900444	0.257831	0.000375789	0.00750604	1.07926
8379-35_4	IL-9	-0.0992037	-0.0925092	0.257499	0.000384188	0.00750604	1.10339
2615-60_2	Ephrin-A5	-0.123453	-0.137061	0.257748	0.000377872	0.00750604	1.08525
3046-31_1	resistin	0.255256	0.20086	0.257125	0.000393849	0.00754089	1.13113
8756-41_3	KCE1L	0.366268	0.109372	0.257167	0.000392764	0.00754089	1.12802
9574-11_3	BIN1	-0.617444	-0.111352	0.257291	0.000389527	0.00754089	1.11872
6401-73_3	SLUR1	0.180287	0.13285	0.256086	0.000421897	0.0077299	1.21169
3817-18_1	KPCT	0.260572	0.125359	0.25592	0.000426556	0.0077299	1.22507
9816-37_3	ISOC1	0.295435	0.124111	0.255796	0.000430081	0.0077299	1.23519
7799-3_3	KI2LA	0.470203	0.1183	0.256253	0.000417286	0.0077299	1.19845
8381-18_4	RETST	0.00399621	0.104997	0.25592	0.000426556	0.0077299	1.22507
3581-53_3	a2-HS-Glycoprotein	-0.0732079	-0.0882553	0.255879	0.000427728	0.0077299	1.22843
3325-2_2	MATN2	-0.0874065	-0.0911353	0.256086	0.000421897	0.0077299	1.21169
9997-12_3	UBXN4	-0.180513	-0.174387	0.255588	0.000436018	0.0077299	1.25224
4314-12_2	XTP3A	-0.187076	-0.181213	0.256003	0.00042422	0.0077299	1.21836
9282-12_3	CRIS2	-0.178407	-0.18923	0.256211	0.000418435	0.0077299	1.20174
10970-3_3	NAR3	-0.0756148	-0.207489	0.255671	0.000433634	0.0077299	1.2454
8337-65_3	PTPRU	-0.0785538	-0.251602	0.255671	0.000433634	0.0077299	1.2454
10440-26_3	ACAM	-0.237313	-0.119632	0.254508	0.000468154	0.0081984	1.34454
7083-74_3	MATN4	-0.248921	-0.340239	0.254508	0.000468154	0.0081984	1.34454
6433-57_3	FA20A	0.218848	0.141607	0.2543	0.000474584	0.00825577	1.363
3461-58_1	PGCB	-0.107186	-0.15648	0.254217	0.000477179	0.00825577	1.37046
6442-6_3	BAGE3	-0.102507	-0.0902629	0.254051	0.000482409	0.00829628	1.38548
9449-150_3	C4b-binding protein alpha chain	0.137184	0.166151	0.253926	0.000486367	0.0083067	1.39685
6353-60_3	IGFL4	0.172758	0.122432	0.25376	0.000491692	0.0083067	1.41214
6042-52_3	OFUT2	0.101535	0.0854301	0.25376	0.000491692	0.0083067	1.41214
2871-73_2	RAD51	-0.259604	-0.087516	0.253635	0.000495721	0.0083258	1.42371
7849-3_3	Glutaminyl cyclase	0.308176	0.273422	0.252472	0.000534856	0.00885213	1.53611
8850-5_3	PA2GC	0.0470993	0.11669	0.25243	0.000536306	0.00885213	1.54027
9361-7_3	PCDC2	-0.0334529	0.0795467	0.25243	0.000536306	0.00885213	1.54027
8073-3_3	SLAF5	0.099691	0.0866904	0.252223	0.000543611	0.00889477	1.56125
9348-1_3	C1RL1	0.0754609	0.0806143	0.252181	0.000545084	0.00889477	1.56548
3797-1_1	Cadherin-2	0.489471	0.118674	0.252057	0.000549523	0.00891655	1.57823
10518-14_3	TUTLA	0.238026	0.0917204	0.25189	0.000555495	0.00896281	1.59538
5650-9_3	PDIA6	0.157116	0.135531	0.250727	0.000599034	0.00947834	1.72043
5347-59_3	Cyclin B1	0.103918	0.0930479	0.250852	0.00059422	0.00947834	1.7066
6245-4_3	Nectin-2	0.121089	0.0867556	0.250935	0.000591032	0.00947834	1.69744
4569-52_2	SORC2	-1.50817	-0.278303	0.250686	0.000600647	0.00947834	1.72506
10362-35_3	c-Myc	4.01676	0.113578	0.249107	0.000665036	0.0104371	1.90998
2436-49_4	CXCL16, soluble	0.0926876	0.0952314	0.248857	0.000675776	0.0105181	1.94083
5138-50_3	TWEAKR	-0.163644	0.0680345	0.24865	0.00068485	0.0105181	1.96689
8535-102_3	Dermokine	-0.299666	-0.0839046	0.248733	0.000681207	0.0105181	1.95643
3378-49_2	Kallikrein 7	-0.260792	-0.204297	0.248567	0.000688511	0.0105181	1.9774
8773-172_3	EMIL3	-0.152534	-0.282905	0.248774	0.000679392	0.0105181	1.95121
2711-6_2	CNTFR alpha	-0.253412	-0.126017	0.24757	0.000733904	0.0111522	2.10777
4148-49_2	PAPP-A	0.218002	0.422096	0.247403	0.000741736	0.0112119	2.13027
8252-2_3	NOTUM	-0.0384701	-0.237831	0.247237	0.000749647	0.0112722	2.15299
4124-24_2	HSP 70	-0.124626	-0.132794	0.247113	0.000755632	0.011303	2.17018
5633-65_3	ILT-4	0.152854	0.169976	0.245534	0.000835419	0.0120917	2.39932
7008-13_3	F176C	0.148949	0.109569	0.245575	0.000833222	0.0120917	2.39301
8366-19_3	CA115	0.0333702	0.0667496	0.245409	0.000842043	0.0120917	2.41835
5343-74_3	CBPE	0.0812032	-0.0806577	0.245617	0.00083103	0.0120917	2.38672
3893-55_2	Mesothelin	-0.21395	-0.106168	0.245409	0.000842043	0.0120917	2.41835
4763-31_3	Afamin	-0.106752	-0.115643	0.245658	0.000828844	0.0120917	2.38044
2765-4_3	GDF-11	-0.199357	-0.200984	0.245617	0.00083103	0.0120917	2.38672
3212-30_3	ASAH2	-0.539115	-0.27539	0.245866	0.000817994	0.0120917	2.34928
6480-1_3	CANT1	0.273935	0.128416	0.245201	0.000853191	0.0121305	2.45036
2968-61_1	TNFSF15	0.0972878	0.0683564	0.245243	0.00085095	0.0121305	2.44393
9050-170_3	CA063	0.689118	0.0463075	0.245077	0.000859946	0.0121663	2.46977
2686-67_2	IGFBP-6	-0.12823	-0.171443	0.244163	0.000911036	0.012826	2.61649
4959-2_1	AGR2	-0.165541	0.109481	0.243914	0.000925454	0.0129654	2.6579
8818-13_3	INGR2	-0.0128995	0.125413	0.243581	0.00094501	0.013054	2.71407
3186-2_2	C2	0.122869	0.109158	0.24354	0.000947482	0.013054	2.72117
4957-1_2	40S ribosomal protein SA	0.0960259	0.103418	0.243498	0.000949959	0.013054	2.72828
9077-10_3	MA1A2	0.0948509	0.0701208	0.243664	0.000940085	0.013054	2.69992
2742-68_2	Siglec-7	0.12772	0.10803	0.242376	0.00101919	0.0138498	2.9271
5032-64_1	SSRP1	0.785489	0.108004	0.242252	0.00102716	0.0138498	2.95001
10723-41_3	WDR1	-0.433461	-0.137059	0.242293	0.0010245	0.0138498	2.94236
3607-71_1	DKK3	-0.160812	-0.157647	0.242459	0.0010139	0.0138498	2.91192
5013-2_1	NCC27	0.0900687	0.15671	0.242002	0.00104329	0.0139726	2.99633
7778-104_3	BINCA	1.11754	0.0970208	0.241961	0.001046	0.0139726	3.00412
9491-13_3	TRGC1	0.568814	0.268065	0.241836	0.00105417	0.0140166	3.02759
8475-15_3	MMP-7	-0.0494446	0.0953426	0.241629	0.00106793	0.014134	3.06708
8595-75_3	SMR3B	0.0963255	0.12103	0.240507	0.00114513	0.0148243	3.28881
9910-9_3	MTAP	-0.0640422	-0.0497908	0.240715	0.00113045	0.0148243	3.24666
2867-52_2	PKB a/b/g	-0.101246	-0.109339	0.240507	0.00114513	0.0148243	3.28881
4775-34_3	Gelsolin	-0.102286	-0.11063	0.240465	0.00114809	0.0148243	3.29731
8606-39_3	GPNMB	-0.0897483	-0.183764	0.240424	0.00115105	0.0148243	3.30582
9076-25_3	PENK	-0.0526564	-0.240815	0.240631	0.0011363	0.0148243	3.26346
3504-58_2	LEAP-1	0.580547	0.660398	0.240174	0.00116899	0.0149159	3.35733
10460-1_3	Chitotriosidase-1	0.515808	0.378067	0.240091	0.00117502	0.0149159	3.37467
3508-78_3	MDC	0.309093	0.196047	0.239967	0.00118413	0.0149159	3.40083
7181-17_3	VAPB	0.0467354	0.0783498	0.24005	0.00117805	0.0149159	3.38336
8761-7_3	FAF2	0.100895	0.045658	0.239967	0.00118413	0.0149159	3.40083
2914-65_3	NAP-2	0.062433	0.21131	0.23843	0.00130202	0.0159531	3.73941
8750-46_3	Vinculin	-0.0593302	0.150708	0.238388	0.00130536	0.0159531	3.74898
6993-8_3	5'-Nucleotidase	0.0212562	0.126802	0.238388	0.00130536	0.0159531	3.74898
7140-1_3	ELA2A	0.108964	0.106088	0.238637	0.00128548	0.0159531	3.69189
9400-40_3	Galectin-7	0.123137	0.096773	0.238803	0.00127238	0.0159531	3.65428
7219-152_3	LICH	-0.162685	-0.139443	0.238596	0.00128877	0.0159531	3.70135
5029-3_1	SEPR	-0.188004	-0.159652	0.23872	0.00127891	0.0159531	3.67304
4931-59_1	TF	-0.319593	-0.0691165	0.238263	0.0013154	0.0160078	3.77784
3613-62_5	FCN1	0.308932	0.224363	0.2371	0.00141271	0.0168512	4.05731
3580-25_8	a1-Antitrypsin	0.0276705	0.139834	0.237059	0.00141631	0.0168512	4.06764
9613-16_3	CH033	0.150873	0.129763	0.237059	0.00141631	0.0168512	4.06764
6547-83_3	TM11D	0.0144926	0.10594	0.237017	0.00141991	0.0168512	4.07799
8306-54_3	TMG1	0.126355	0.0987947	0.237266	0.00139841	0.0168512	4.01624
3198-4_1	IDS	-0.173951	-0.144539	0.237017	0.00141991	0.0168512	4.07799
6941-11_3	SUMF1	0.0859901	0.0868096	0.236892	0.00143078	0.0169103	4.1092
6577-64_3	LAMA4	0.143221	0.133152	0.236643	0.00145274	0.017073	4.17228
4962-52_1	ARMEL	-0.0854536	-0.0931121	0.236602	0.00145643	0.017073	4.18288
6580-29_3	Pregnancy zone protein	0.388587	0.446177	0.236352	0.00147876	0.0172643	4.24701
2643-57_2	P-Cadherin	-0.0994019	-0.0993184	0.235646	0.00154377	0.0179503	4.43372
4453-83_3	LRRT3	0.280782	0.233169	0.234898	0.0016155	0.0182613	4.63972
10035-6_3	DUS4	-0.0697032	0.109331	0.234815	0.00162366	0.0182613	4.66315
9457-3_3	CAV2	0.206714	0.0929396	0.235147	0.00159125	0.0182613	4.57008
5307-12_3	Coagulation Factor IXab	0.0794306	0.0833537	0.235231	0.00158325	0.0182613	4.54709
9290-8_3	RMD3	0.806989	0.0595231	0.23494	0.00161144	0.0182613	4.62804
2826-53_2	EDA	-0.151307	-0.0627722	0.235064	0.0015993	0.0182613	4.59319
8340-9_3	DB110	-0.135271	-0.0865111	0.234815	0.00162366	0.0182613	4.66315
8780-2_3	PCD10	-0.368427	-0.125662	0.234774	0.00162775	0.0182613	4.6749
4548-4_2	Fucosyltransferase 3	-0.409953	-0.140321	0.235023	0.00160334	0.0182613	4.60478
3302-58_1	CYTF	0.402896	0.275431	0.233693	0.00173761	0.0190703	4.99041
10453-7_3	CEA20	0.560538	0.230636	0.233693	0.00173761	0.0190703	4.99041
3148-49_1	Gro-b/g	0.156697	0.172076	0.23361	0.00174634	0.0190703	5.01548
2658-27_1	TrkC	-0.102049	-0.0915588	0.233693	0.00173761	0.0190703	4.99041
8222-49_3	CDHR3	0.340606	-0.0957235	0.233652	0.00174197	0.0190703	5.00293
2942-50_2	Cytochrome c	-0.319607	-0.123972	0.233901	0.00171596	0.0190703	4.92824
2827-23_2	Fractalkine/CX3CL-1	-0.0769789	-0.138524	0.233776	0.00172892	0.0190703	4.96545
10370-21_3	STAT1	0.264719	0.225005	0.233319	0.00177721	0.0193333	5.10415
5364-7_3	SET	0.0385568	0.0976935	0.233236	0.00178613	0.0193333	5.12976
10438-19_3	CSF2R	0.0802616	0.0766425	0.23307	0.00180408	0.0193333	5.18132
3853-56_1	MDHC	-0.122609	-0.121473	0.23307	0.00180408	0.0193333	5.18132
4913-78_1	HCC-4	-0.33917	-0.198286	0.233112	0.00179958	0.0193333	5.16838
7939-1_3	CC055	-0.29975	0.103944	0.232987	0.00181312	0.0193579	5.20728
2913-1_2	MPIF-1	0.229191	0.285203	0.231907	0.00193452	0.020429	5.55594
6119-14_3	MAMC2	0.00354856	0.138378	0.231824	0.00194416	0.020429	5.58364
6536-54_3	LAML2	0.0503151	0.0733307	0.231782	0.001949	0.020429	5.59754
8935-22_3	MRP6	-0.0661279	-0.0633309	0.231824	0.00194416	0.020429	5.58364
10832-24_3	B4GT6	-0.194071	-0.117749	0.231948	0.00192971	0.020429	5.54214
9362-11_3	DB123	0.145107	0.256167	0.231699	0.00195871	0.0204561	5.62543
3352-80_3	Carbonic anhydrase 6	-0.284468	-0.349297	0.231616	0.00196847	0.0204835	5.65345
6572-10_3	LRRT4	-0.0162058	0.103877	0.231408	0.00199306	0.0206645	5.72407
9579-59_3	TMG4	0.349539	0.177389	0.230204	0.00214138	0.0219322	6.15004
9569-14_3	SCAR3	1.96568	0.174498	0.229913	0.00217868	0.0219322	6.25717
9263-57_3	SIAE	0.11594	0.134954	0.229913	0.00217868	0.0219322	6.25717
3608-12_5	DPP2	0.039955	0.11928	0.229954	0.00217331	0.0219322	6.24176
3152-57_1	TNF sR-II	0.0734833	0.0776746	0.229996	0.00216796	0.0219322	6.22638
3316-58_1	Heparin cofactor II	0.123054	0.067984	0.229871	0.00218406	0.0219322	6.27261
9744-139_3	DNJA4	0.00231105	-0.0633369	0.229954	0.00217331	0.0219322	6.24176
2938-55_2	Apo E4	-0.138211	-0.0930791	0.230245	0.0021361	0.0219322	6.13487
5963-9_3	Dermokine	-0.0770679	-0.114579	0.230204	0.00214138	0.0219322	6.15004
3320-49_2	IGFBP-7	-0.0764398	-0.0712262	0.228666	0.00234547	0.023447	6.73619
3041-55_2	MRC2	-0.183098	-0.143168	0.228625	0.00235123	0.023447	6.75272
6932-42_3	ITA5	0.0773916	0.049302	0.2285	0.00236858	0.0235383	6.80256
6930-95_3	SIA8F	-0.0741899	-0.158199	0.228376	0.00238605	0.0236301	6.85274
7960-53_3	POTEG	0.110691	0.120915	0.228209	0.00240953	0.0236992	6.92017
3220-40_2	RET	0.020519	-0.113233	0.228251	0.00240364	0.0236992	6.90326
8907-11_3	UD2A1	0.149335	0.146243	0.227877	0.00245714	0.024085	7.05689
3802-50_1	Cystatin-S	0.802177	0.143415	0.226921	0.00259889	0.025047	7.46401
3073-51_2	IL-18 BPa	0.200174	0.126106	0.227005	0.00258627	0.025047	7.42776
6568-18_3	HECA2	0.111736	0.0507697	0.227046	0.00257998	0.025047	7.4097
7910-41_3	LRFN1	0.0426711	-0.0326977	0.227046	0.00257998	0.025047	7.4097
9304-27_3	FSTL1	-0.213447	-0.0664026	0.226921	0.00259889	0.025047	7.46401
10365-132_3	IL-23	0.174716	0.160647	0.226672	0.00263709	0.0250786	7.57373
2979-8_2	ENA-78	0.0900517	0.0793081	0.226838	0.00261157	0.0250786	7.50042
3392-68_2	PKB a/b/g	-0.106418	-0.107811	0.226714	0.00263069	0.0250786	7.55534
2834-54_1	kallikrein 8	-0.151534	-0.168276	0.226672	0.00263709	0.0250786	7.57373
7780-34_3	PACAP	0.220649	0.182601	0.226464	0.00266932	0.0252181	7.6663
7885-17_3	complement factor H-related 5	0.216616	0.126202	0.226506	0.00266285	0.0252181	7.6477
9853-3_3	IFIT2	0.410453	0.0922526	0.226381	0.00268232	0.0252578	7.70362
2985-35_1	Gro-a	0.172105	0.205684	0.226091	0.00272826	0.0256064	7.83557
8357-43_3	ST4A1	0.769756	0.325043	0.225093	0.00289136	0.0270488	8.30398
3633-70_5	NID2	0.132127	0.121266	0.224803	0.00294059	0.0272012	8.44539
7233-73_3	P2RX6	0.108122	0.0790556	0.224927	0.0029194	0.0272012	8.38451
10049-112_3	TERF1	-0.193815	0.071425	0.224553	0.00298341	0.0272012	8.56837
3192-3_2	Glutamate carboxypeptidase	-0.0455232	-0.0592169	0.224595	0.00297624	0.0272012	8.54776
7231-37_3	TM11A	-0.162726	-0.0670536	0.224553	0.00298341	0.0272012	8.56837
2633-52_2	IL-13 Ra1	-0.0796877	-0.0864591	0.224761	0.00294769	0.0272012	8.46577
9061-3_3	ARHGA	-0.0494396	-0.0884037	0.224678	0.00296193	0.0272012	8.50667
7202-107_3	SEMA6C	-0.033894	-0.129559	0.224636	0.00296908	0.0272012	8.52719
9326-33_3	ITI heavy chain H2	-0.11535	-0.0713765	0.223515	0.0031681	0.0287936	9.09878
2851-63_3	C5a	0.138424	0.148159	0.223307	0.00320628	0.0288453	9.20843
7206-20_3	F16P1	0.281061	0.140066	0.22339	0.00319095	0.0288453	9.16442
4769-10_3	Olfactomedin-4	0.746954	0.0792193	0.223265	0.00321396	0.0288453	9.2305
3303-23_2	Cystatin M	-0.169049	-0.181728	0.223349	0.00319861	0.0288453	9.1864
3485-28_2	b2-Microglobulin	0.0934021	0.0877202	0.223058	0.00325265	0.0291016	9.34162
8463-2_3	SOD3	-0.248098	-0.105679	0.222975	0.00326825	0.0291503	9.38641
8052-115_3	NLGN1	-0.247405	-0.16974	0.22285	0.00329177	0.0292692	9.45396
2925-9_1	PAI-1	0.105871	0.16194	0.222725	0.00331545	0.0292783	9.52197
3848-14_2	GAPDH, liver	0.21426	0.119582	0.222684	0.00332338	0.0292783	9.54473
4961-17_1	annexin II	-0.213044	-0.126118	0.222684	0.00332338	0.0292783	9.54473
5801-72_3	b-NGF	0.102632	0.0836862	0.222601	0.00333928	0.0293285	9.59042
4541-49_2	CDON	-0.187979	-0.129949	0.221853	0.00348564	0.0305206	10.0108
3038-9_2	I-TAC	0.382478	0.350507	0.221728	0.0035106	0.0305649	10.0825
5245-40_5	AMPK a2b2g1	0.2943	0.221968	0.221354	0.00358647	0.0305649	10.3004
10512-13_3	IL3RB	-0.12816	0.165127	0.221521	0.00355257	0.0305649	10.203
9173-21_3	PGM1	-0.145636	0.139622	0.221521	0.00355257	0.0305649	10.203
10880-38_3	F163B	0.0614833	0.0567522	0.221396	0.00357797	0.0305649	10.2759
2917-3_2	sRANKL	-0.0835985	-0.0966972	0.221437	0.00356948	0.0305649	10.2516
7218-87_3	AT1B2	-0.105517	-0.120808	0.221354	0.00358647	0.0305649	10.3004
4328-2_2	BOC	-0.376653	-0.144571	0.221604	0.00353573	0.0305649	10.1546
8005-1_3	MXRA7	-0.177459	-0.158093	0.221562	0.00354414	0.0305649	10.1788
9067-152_3	CEP57	0.115649	0.108829	0.221188	0.00362068	0.0306743	10.3986
7970-315_3	NAR3	-0.0779094	-0.237772	0.22123	0.0036121	0.0306743	10.3739
3171-57_2	amyloid precursor protein	0.226617	0.140497	0.221105	0.00363789	0.0307295	10.448
3043-49_2	ON	0.18985	0.16131	0.219983	0.00387778	0.032528	11.137
10917-40_3	GBGT2	-0.258232	0.11516	0.2199	0.00389611	0.032528	11.1896
10888-4_3	GALT7	0.151363	0.0911601	0.2199	0.00389611	0.032528	11.1896
5457-5_2	COLEC12	-0.203263	-0.157461	0.2199	0.00389611	0.032528	11.1896
4915-64_2	Hemoglobin	-0.105574	-0.319344	0.219776	0.00392376	0.0326639	11.2691
7860-9_3	HERC4	0.239731	0.0904324	0.219609	0.00396092	0.0326889	11.3758
8383-20_3	CK094	0.151596	0.0515917	0.219609	0.00396092	0.0326889	11.3758
8396-42_3	FAAH2	-0.15002	-0.123563	0.219651	0.0039516	0.0326889	11.349
9178-30_3	NEUREGULIN-1	0.855713	0.108303	0.219402	0.00400781	0.0329812	11.5104
6231-46_3	STC2	0.146008	0.0684094	0.219236	0.00404569	0.0330092	11.6192
9087-8_3	NHLC3	0.209781	-0.0720735	0.219319	0.00402671	0.0330092	11.5647
8355-80_3	ISM1	-0.257003	-0.0806794	0.219236	0.00404569	0.0330092	11.6192
2212-69_1	tPA	0.0787413	0.0968714	0.219111	0.00407432	0.0331486	11.7014
7244-16_3	TM149	0.1574	0.0873935	0.218488	0.00422027	0.034239	12.1206
11104-13_3	YKL-40	0.356598	0.214907	0.21828	0.00426998	0.0344477	12.2634
7801-30_3	FAM107B	0.637235	0.084651	0.218322	0.00426	0.0344477	12.2347
6896-3_3	CA162	0.228074	0.258742	0.218114	0.00431013	0.0345774	12.3787
9117-4_3	IL-1F9	0.115903	0.0987507	0.218114	0.00431013	0.0345774	12.3787
4543-65_2	CONA1	0.197992	0.109311	0.217989	0.00434048	0.0347238	12.4658
9021-1_3	TIM-1	0.103472	0.176905	0.217781	0.00439148	0.0349372	12.6123
3061-61_2	Cathepsin B	-0.0319026	0.0959476	0.217781	0.00439148	0.0349372	12.6123
6456-17_3	PSG6	0.361748	0.041999	0.217532	0.00445342	0.0353321	12.7902
10962-46_3	D105A	0.33516	0.0306503	0.216784	0.00464406	0.0367431	13.3377
6556-5_3	ENPP5	-0.247415	-0.131711	0.216701	0.0046657	0.0368129	13.3999
7997-118_3	DOC2B	0.235326	0.103675	0.216535	0.00470926	0.0368528	13.525
3889-64_2	Lamin-B1	0.12023	0.0499037	0.216577	0.00469833	0.0368528	13.4936
5759-10_3	Ephrin-A3	-0.234926	-0.0484828	0.216618	0.00468743	0.0368528	13.4623
6528-95_3	EXTL2	0.103676	0.0980702	0.216327	0.00476422	0.0370809	13.6829
3292-75_1	CD48	0.0686285	0.0834231	0.216327	0.00476422	0.0370809	13.6829
8232-90_3	JAML1	0.160157	0.149881	0.216161	0.00480862	0.0370846	13.8104
4194-26_3	AN32B	0.0583603	0.116376	0.216037	0.00484217	0.0370846	13.9067
2700-56_2	Protein S	0.0787497	0.10422	0.216161	0.00480862	0.0370846	13.8104
5236-2_3	NR1D1	0.217798	0.0904772	0.216161	0.00480862	0.0370846	13.8104
6521-35_3	NPTX2	0.186763	0.0756239	0.216037	0.00484217	0.0370846	13.9067
8389-8_3	CN16B	0.25978	0.0626952	0.21612	0.00481978	0.0370846	13.8424
6036-78_3	EPHAA	0.229381	0.139785	0.215829	0.00489856	0.0372187	14.0687
5255-22_3	PDE4D	-0.0353671	0.106756	0.215829	0.00489856	0.0372187	14.0687
4993-16_1	GSTA3	0.0125091	0.0725341	0.21587	0.00488723	0.0372187	14.0361
3474-19_2	Thrombospondin-1	0.203404	0.129541	0.215746	0.00492128	0.0372927	14.1339
6550-4_3	ICAM4	0.238309	0.251756	0.214749	0.00520161	0.0386301	14.939
6304-8_3	C1QT1	0.175047	0.144706	0.214499	0.00527394	0.0386301	15.1468
5663-18_3	PF4V	0.636414	0.125975	0.214541	0.00526182	0.0386301	15.1119
5128-53_3	SLAF6	0.135534	0.109801	0.214582	0.00524973	0.0386301	15.0772
9199-6_3	UB2G2	-0.0570735	0.103563	0.21479	0.00518964	0.0386301	14.9047
3881-49_2	DLC8	0.207456	0.0886529	0.21479	0.00518964	0.0386301	14.9047
7746-230_3	NCAM1	0.227597	0.0810139	0.21479	0.00518964	0.0386301	14.9047
5204-13_3	PSME3	0.00183967	0.0770854	0.214499	0.00527394	0.0386301	15.1468
2607-54_2	CLF-1/CLC Complex	0.156316	0.0456687	0.214541	0.00526182	0.0386301	15.1119
3289-19_2	Carbonic Anhydrase X	-0.14275	-0.0471263	0.214749	0.00520161	0.0386301	14.939
5483-1_3	RGMA	-0.125499	-0.0909607	0.214998	0.00513019	0.0386301	14.7339
4238-4_2	LIN7B	-0.141625	-0.0917339	0.214666	0.00522562	0.0386301	15.008
6382-17_3	MANBA	-0.125459	-0.122664	0.21479	0.00518964	0.0386301	14.9047
3799-11_2	Carbonic anhydrase III	-0.163819	-0.200942	0.214458	0.00528608	0.0386301	15.1816
9991-112_3	EMIL3	0.213103	0.268245	0.214292	0.00533492	0.0387806	15.3219
6447-73_3	PTX3	0.0691492	0.0502054	0.21425	0.00534719	0.0387806	15.3571
10025-1_3	DLDH	-0.117132	-0.133582	0.214333	0.00532267	0.0387806	15.2867
2750-3_2	Apo A-I	-0.116195	-0.0767504	0.214167	0.00537181	0.0388611	15.4278
4903-72_1	Calcineurin	-0.130803	-0.0674944	0.21317	0.0056755	0.0409457	16.3
2743-5_2	Sonic Hedgehog	-0.209938	-0.203825	0.213128	0.00568848	0.0409457	16.3373
4992-49_1	GRN	0.152072	0.122823	0.213004	0.00572761	0.0411242	16.4497
5066-134_3	CLM6	0.0525959	0.143458	0.212713	0.00581986	0.0412557	16.7147
10606-34_3	TOIP1	0.097863	0.0748057	0.212838	0.00578016	0.0412557	16.6006
8053-16_3	DJB14	-0.00181629	-0.0712254	0.21263	0.00584647	0.0412557	16.7911
5690-49_3	TUFT1	-0.105023	-0.0909332	0.21263	0.00584647	0.0412557	16.7911
10552-88_3	NKG2F	0.537232	-0.096377	0.212713	0.00581986	0.0412557	16.7147
3326-58_2	Nectin-like protein 2	-0.123302	-0.105207	0.21263	0.00584647	0.0412557	16.7911
5954-62_3	PTH	-0.303354	-0.263987	0.21263	0.00584647	0.0412557	16.7911
7890-68_3	DPP10	0.0623494	0.108384	0.212381	0.00592696	0.0413161	17.0222
9877-28_3	CRKL	0.171032	0.0829608	0.212422	0.00591348	0.0413161	16.9835
5359-65_3	PIM1	0.129578	0.0724244	0.212464	0.00590002	0.0413161	16.9449
7953-20_3	SLAF1	0.0587197	0.0702282	0.212505	0.00588659	0.0413161	16.9063
2889-37_2	Cardiotrophin-1	-0.227556	-0.0454727	0.212464	0.00590002	0.0413161	16.9449
10661-4_3	TM41B	0.178612	0.0831207	0.212297	0.00595401	0.0414042	17.0999
2848-2_2	WIF-1	-0.172304	-0.0101095	0.211508	0.00621671	0.0431266	17.8544
3470-1_2	sE-Selectin	0.145675	0.107385	0.211383	0.00625915	0.0433163	17.9763
6494-60_3	sperm acrosome associated 5	0.514144	0.083532	0.2113	0.00628758	0.0434085	18.0579
6060-2_3	PIP	0.138363	0.289103	0.210926	0.00641701	0.0434662	18.4297
3034-1_2	GFAP	1.17746	0.167724	0.211176	0.00633046	0.0434662	18.1811
2860-19_2	Karyopherin-a2	0.13364	0.144586	0.21101	0.00638804	0.0434662	18.3465
7038-45_3	SIA8D	-0.263757	0.121755	0.211051	0.0063736	0.0434662	18.305
6295-67_3	VCY1	0.0813104	0.107288	0.21101	0.00638804	0.0434662	18.3465
9767-22_3	RIPP1	0.102135	0.0681232	0.21101	0.00638804	0.0434662	18.3465
8646-61_3	LRRT4	-0.125088	-0.0483763	0.210968	0.00640251	0.0434662	18.388
5864-10_3	aldolase A	-0.193578	-0.113814	0.210968	0.00640251	0.0434662	18.388
10021-1_3	SUSD2	0.29257	0.0746186	0.21076	0.00647531	0.0437539	18.5971
2878-66_2	YES	-0.0753061	-0.0468281	0.210719	0.00648996	0.0437539	18.6392
9386-42_3	TTC9B	0.135379	0.0240022	0.210553	0.00654887	0.0440441	18.8083
8925-25_3	RIR2B	-0.0343397	-0.0859032	0.210511	0.00656367	0.0440441	18.8509
3519-3_2	TARC	0.073833	0.0743341	0.20968	0.0068662	0.0458564	19.7197
2944-66_2	DAN	-0.0199043	-0.0940934	0.209722	0.00685077	0.0458564	19.6754
9590-10_3	COX7R	-0.81643	-0.175292	0.209639	0.00688165	0.0458564	19.7641
6966-144_3	STX1B	-0.109903	0.110674	0.209472	0.00694379	0.0461633	19.9426
6997-32_3	RAB26	0.0972294	0.168516	0.209389	0.00697505	0.0462641	20.0323
10830-5_3	K0494	0.326233	0.0906762	0.20914	0.0070696	0.046462	20.3039
6420-4_3	SDHF2	-0.0604253	-0.043541	0.20914	0.0070696	0.046462	20.3039
9906-21_3	TICN3	-0.184568	-0.0594397	0.209223	0.00703796	0.046462	20.213
9322-15_3	RCN1	-0.168732	-0.142222	0.209182	0.00705376	0.046462	20.2584
3069-52_3	IgM	0.0595688	0.143	0.208932	0.00714929	0.0468784	20.5328
4455-89_2	MFGM	-0.240981	-0.102827	0.208683	0.00724599	0.0474043	20.8105
3310-62_1	FCG2A/B	0.328009	-0.0507899	0.208184	0.00744297	0.0485823	21.3762
9800-20_3	NDUB8	0.222629	0.0971049	0.208018	0.00750971	0.048686	21.5679
7765-15_3	ITM2A	0.169209	0.070215	0.208101	0.00747628	0.048686	21.4719
3035-80_2	IL-19	-0.0997397	-0.0627273	0.208018	0.00750971	0.048686	21.5679
9857-38_3	IRF4	0.0677431	0.106048	0.207894	0.00756012	0.0487918	21.7127
10659-49_3	MUC4	-0.0116504	0.0597611	0.207935	0.00754329	0.0487918	21.6643
8382-47_3	MAPK5	-0.275294	-0.411639	0.207852	0.00757699	0.0487918	21.7611
2890-59_2	CCL28	0.20979	0.229463	0.207686	0.00764483	0.0491181	21.9559
7228-2_3	SIA7F	0.058951	0.0650814	0.207644	0.00766187	0.0491181	22.0049
10024-44_3	HOGA1	-1.17763	0.140267	0.207437	0.00774761	0.0495571	22.2511
3079-62_2	TIG2	0.0719649	0.0618568	0.207395	0.00776486	0.0495571	22.3007
3431-54_2	EphA1	-0.222873	-0.264771	0.207354	0.00778215	0.0495573	22.3503
2697-7_2	PF-4	0.233605	0.178226	0.20727	0.00781683	0.0495583	22.4499
9341-1_3	PDGFD	0.119856	0.0981094	0.20727	0.00781683	0.0495583	22.4499
4496-60_2	MMP-12	0.217845	0.238271	0.207187	0.00785165	0.0495603	22.5499
6393-63_3	Endoplasmin	0.0775384	0.0764403	0.207187	0.00785165	0.0495603	22.5499
9089-77_3	JPH3	0.117165	0.0673782	0.207063	0.00790414	0.0497822	22.7007
9223-11_3	ARMET	0.197642	0.202381	0.206107	0.00831733	0.0513738	23.8874
7132-55_3	C1QL4	0.193001	0.0726766	0.20619	0.00828063	0.0513738	23.782
9053-16_3	CRIP2	-0.134338	0.0684773	0.206066	0.00833573	0.0513738	23.9402
8003-57_3	LGI3	0.0180228	0.0672232	0.206066	0.00833573	0.0513738	23.9402
7192-37_3	CRF2-12	0.066086	0.0283517	0.206356	0.00820769	0.0513738	23.5725
3506-49_1	Lymphotoxin a2/b1	-0.0842323	-0.0545641	0.206107	0.00831733	0.0513738	23.8874
8288-27_3	b2-Glycoprotein I	-0.078025	-0.0665557	0.206066	0.00833573	0.0513738	23.9402
5698-60_3	Tenascin-X	-0.0997311	-0.0802152	0.20619	0.00828063	0.0513738	23.782
8295-16_3	NOE2	-0.0584538	-0.0901359	0.206273	0.00824409	0.0513738	23.677
9297-12_3	B3GN8	-0.140289	-0.147384	0.206356	0.00820769	0.0513738	23.5725
10588-39_3	SIAT9	1.19889	0.163852	0.205941	0.00839116	0.0516047	24.0994
8057-78_3	USE1	0.191729	-0.091885	0.205899	0.00840971	0.0516083	24.1527
7257-18_3	TIP39	0.0744027	0.152181	0.205816	0.00844692	0.0516161	24.2595
2731-29_2	NADPH-P450 Oxidoreductase	0.221991	-0.111078	0.205816	0.00844692	0.0516161	24.2595
7239-9_3	GST M1-1	0.025493	-0.0952001	0.205733	0.00848428	0.0517343	24.3669
9302-90_3	G45IP	-0.0654119	0.054704	0.205692	0.00850302	0.0517387	24.4207
7084-1_3	DRAXI	0.498319	0.0542103	0.205609	0.0085406	0.0517481	24.5286
5807-77_3	CD70	-0.316185	0.0442827	0.205609	0.0085406	0.0517481	24.5286
6909-40_3	MGAT2	0.102043	0.0883	0.205567	0.00855945	0.0517532	24.5828
5756-66_3	PAPP2	0.350496	0.0438353	0.205526	0.00857834	0.0517584	24.637
5118-74_2	RTN4	0.0715356	0.142905	0.205484	0.00859727	0.0517638	24.6914
6366-38_3	TXD15	0.104188	0.0550196	0.205442	0.00861623	0.0517695	24.7458
7756-37_3	KLRF1	0.020283	0.0527698	0.205401	0.00863523	0.0517753	24.8004
7891-45_3	UGT 1A6	-0.0520088	0.158883	0.205318	0.00867335	0.0518956	24.9099
7139-14_3	SLIK4	-0.175566	-0.110611	0.204445	0.00908291	0.0542331	26.0861
6527-1_3	TRIL	0.089463	0.0980002	0.204321	0.00914283	0.0544776	26.2582
3077-66_2	Coagulation Factor Xa	0.0659105	0.10338	0.204196	0.00920311	0.0544976	26.4313
2685-21_2	IGFBP-5	-0.0777492	-0.0834364	0.204196	0.00920311	0.0544976	26.4313
9753-17_3	Ezrin	-0.0449619	-0.0934692	0.204196	0.00920311	0.0544976	26.4313
5852-6_3	S100A12	0.253335	0.159413	0.20403	0.00928404	0.0546389	26.6638
8772-5_3	EFNB2	-0.10885	0.0525905	0.20403	0.00928404	0.0546389	26.6638
10366-11_3	PDGFRA	-0.0475792	-0.115734	0.204071	0.00926375	0.0546389	26.6055
5957-30_3	Somatostatin-28	0.0703905	0.0471278	0.203988	0.00930438	0.0546466	26.7222
9068-17_3	JKIP3	0.0304458	-0.0881869	0.203739	0.00942723	0.0552551	27.075
4155-3_2	Tenascin	0.065188	0.0826719	0.203614	0.0094892	0.0555051	27.253
8994-65_3	SLAMF8	0.15627	0.187726	0.2027	0.0099551	0.0573924	28.591
9600-55_3	THS7A	-0.207676	0.142488	0.202617	0.00999846	0.0573924	28.7156
3313-21_2	FCN2	0.140756	0.110434	0.202534	0.010042	0.0573924	28.8406
7920-30_3	SIA8B	0.186734	0.0931931	0.202493	0.0100638	0.0573924	28.9033
5070-76_3	DcR3	0.0923694	0.0810535	0.202576	0.0100202	0.0573924	28.778
5764-4_3	GALT2	0.0807962	0.0759074	0.202368	0.0101296	0.0573924	29.0922
8903-1_3	COX6C	0.770337	0.0702433	0.202493	0.0100638	0.0573924	28.9033
3065-65_1	FGF-5	-0.018151	0.0595546	0.202368	0.0101296	0.0573924	29.0922
8687-26_3	T106B	0.330584	0.011155	0.202908	0.00984743	0.0573924	28.2818
3606-2_5	Discoidin domain receptor 2	-0.0769249	-0.0418548	0.202327	0.0101516	0.0573924	29.1554
9211-19_3	PEDF	-0.0573579	-0.0611562	0.202368	0.0101296	0.0573924	29.0922
9234-8_3	TWSG1	-0.104643	-0.0639343	0.202327	0.0101516	0.0573924	29.1554
6259-60_3	Epididymal secretory protein E1	-0.0704405	-0.0697805	0.202617	0.00999846	0.0573924	28.7156
7853-19_3	SCO1	-0.0751718	-0.0792625	0.202825	0.00989037	0.0573924	28.4051
5843-60_3	NG36	-0.124531	-0.0878918	0.202327	0.0101516	0.0573924	29.1554
9459-7_3	Fas, soluble	-0.10965	-0.161066	0.202659	0.00997676	0.0573924	28.6532
10455-196_3	IL-31	-0.149088	-0.223969	0.202368	0.0101296	0.0573924	29.0922
7154-92_3	CF058	0.154737	0.300671	0.202202	0.0102179	0.057428	29.3457
8464-31_3	RSPO4	-0.781533	0.133535	0.202243	0.0101957	0.057428	29.2821
10605-22_3	APMAP	0.0377389	0.124809	0.202202	0.0102179	0.057428	29.3457
8080-24_3	PSMP	-0.182453	-0.119713	0.202119	0.0102623	0.0575649	29.4732
9063-9_3	Apo A-V	-0.455635	-0.0510117	0.201953	0.0103516	0.0579527	29.7297
10364-6_3	SMAD2	0.0969569	0.0375631	0.20187	0.0103965	0.058091	29.8588
3007-7_2	Siglec-9	0.041813	-0.0025591	0.201163	0.0107856	0.0601478	30.9761
4407-10_1	MSP	-0.184153	-0.347443	0.201122	0.0108088	0.0601608	31.043
3858-5_1	PPAC	0.307043	0.510543	0.200997	0.010879	0.0604341	31.2444
8980-19_3	MO2R2	1.87024	0.116668	0.200956	0.0109025	0.0604476	31.3119
10708-3_3	GON2	0.438581	0.145283	0.200872	0.0109495	0.0605475	31.4471
4876-32_1	Coagulation Factor IX	0.0642102	0.0620028	0.200665	0.011068	0.0605475	31.7874
2753-2_2	C1q	-0.116793	-0.0637133	0.200665	0.011068	0.0605475	31.7874
5601-2_3	PGRP-L	-0.11895	-0.139572	0.200789	0.0109968	0.0605475	31.5828
6965-19_3	CNTP2	-0.141802	-0.143223	0.200748	0.0110205	0.0605475	31.6509
9545-156_3	Granzyme K	-0.207038	-0.231403	0.200665	0.011068	0.0605475	31.7874
4969-2_1	Carbonic anhydrase I	-0.0407307	-0.27373	0.200789	0.0109968	0.0605475	31.5828
9243-10_3	LYG1	0.221832	0.0939262	0.200457	0.0111877	0.0609699	32.1311
3499-77_2	IL-17B	-0.175324	0.0653553	0.200457	0.0111877	0.0609699	32.1311
9576-58_3	MNX1	-0.0164507	0.0532981	0.200332	0.0112601	0.061248	32.3389
7243-8_3	IFN-b	-0.35102	-0.0440219	0.200249	0.0113086	0.0613954	32.4782
7796-10_3	CD79A	-0.337581	-0.0602943	0.19946	0.0117786	0.0638264	33.828
10463-23_3	Alkaline phosphatase, intestine	-0.0924041	-0.0359917	0.199418	0.0118038	0.0638426	33.9004
8309-12_3	HYAL1	-0.0952268	-0.0467894	0.199335	0.0118544	0.0639957	34.0457
7002-1_3	MXRA8	-0.00878155	0.0694729	0.199294	0.0118797	0.0640123	34.1185
2705-5_2	TECK	-0.16658	-0.271679	0.199252	0.0119051	0.0640291	34.1915
3622-33_4	LGMN	0.119312	0.09368	0.199211	0.0119306	0.0640461	34.2647
3175-51_5	ATS13	-0.140009	-0.134542	0.199169	0.0119561	0.0640633	34.3379
5091-28_3	ILT-4	0.0744899	0.112351	0.199086	0.0120073	0.0642177	34.4849
3358-51_2	CDK5/p35	-0.12406	-0.058296	0.199003	0.0120586	0.0643726	34.6324
9128-34_3	FLRT3	0.0926053	0.0715971	0.198712	0.01224	0.0652195	35.1533
4467-49_2	SPARCL1	-0.0990965	-0.0824114	0.198671	0.0122661	0.0652375	35.2283
8951-162_3	CSPG4	-0.052684	0.0169941	0.198587	0.0123185	0.065395	35.3787
8346-9_3	DPP2	-0.0134697	0.0561852	0.198504	0.012371	0.0655529	35.5296
6419-75_3	GPA33	0.75807	0.0129784	0.197757	0.0128533	0.0678774	36.9148
5617-41_3	NPFF	-0.117246	-0.083049	0.197715	0.0128806	0.0678774	36.9932
10558-26_3	PCDH9	-0.133275	-0.113178	0.197715	0.0128806	0.0678774	36.9932
2969-11_1	ALK-1	0.922812	0.115096	0.197673	0.012908	0.0678968	37.0717
6478-2_3	IGLO5	-0.0599714	-0.138489	0.19759	0.0129628	0.0680606	37.2291
10672-75_3	SP-B	0.305577	0.335913	0.197466	0.0130454	0.0681414	37.4665
6022-57_3	NELL2	-0.0703297	-0.0584275	0.197466	0.0130454	0.0681414	37.4665
3617-80_4	HGFA	-0.101088	-0.119787	0.197424	0.0130731	0.0681414	37.5459
3000-66_1	MBL	-0.308207	-0.365333	0.197424	0.0130731	0.0681414	37.5459
2876-74_2	Topoisomerase I	0.0583611	0.0773409	0.197383	0.0131008	0.0681621	37.6255
2755-8_2	C3adesArg	-0.0940235	-0.084605	0.197341	0.0131285	0.068183	37.7052
3815-14_1	IL-12 RB2	0.533558	0.125948	0.1973	0.0131564	0.068204	37.785
8220-15_3	CJ035	0.187787	0.0754085	0.197216	0.0132121	0.0683698	37.9452
3132-1_1	VEGF-C	0.0473173	0.0573821	0.19705	0.0133243	0.0687028	38.2675
4306-4_2	Transketolase	-0.0340655	-0.115173	0.19705	0.0133243	0.0687028	38.2675
8312-139_3	Cytidylate kinase	0.147461	0.136556	0.196926	0.013409	0.0690157	38.5108
2480-58_3	TIMP-3	0.163942	0.113421	0.196884	0.0134374	0.0690379	38.5922
5107-7_2	Notch 1	-0.0583546	-0.0529534	0.196053	0.0140157	0.0718805	40.2531
10702-1_3	COSA1	-0.090377	-0.0716766	0.196012	0.0140452	0.0719034	40.3378
7962-11_3	ISK8	0.0127958	0.088331	0.195845	0.0141637	0.0721722	40.6783
9251-28_3	MA2B2	0.0592025	0.0709279	0.195804	0.0141935	0.0721722	40.7638
3737-6_3	Cathepsin H	0.070862	0.0478219	0.195804	0.0141935	0.0721722	40.7638
3177-49_2	Carbonic Anhydrase IV	-0.0470833	-0.0657715	0.195762	0.0142233	0.0721722	40.8495
8042-88_3	ISK9	-0.202928	-0.174475	0.195762	0.0142233	0.0721722	40.8495
7200-4_3	LRFN2	-0.069429	-0.0696015	0.195721	0.0142532	0.0721963	40.9353
2443-10_4	FGF-8B	0.0488647	0.0659053	0.195596	0.0143432	0.0722698	41.1938
9394-19_3	Aminopeptidase	-0.0386124	-0.0788101	0.195638	0.0143132	0.0722698	41.1074
6936-7_3	PMEPA	-0.200989	-0.184776	0.195596	0.0143432	0.0722698	41.1938
2771-35_2	IGFBP-1	0.404984	0.473675	0.195305	0.0145552	0.072574	41.8026
2778-10_2	IL-22	0.0857487	0.0846151	0.195388	0.0144944	0.072574	41.6278
7134-14_3	Apoptosis regulator Bcl-W	0.274464	0.0668107	0.19543	0.014464	0.072574	41.5407
10872-103_3	SCAR3	0.21478	0.0609008	0.19543	0.014464	0.072574	41.5407
8947-268_3	HEG1	-0.405397	-0.0804547	0.195305	0.0145552	0.072574	41.8026
6234-74_3	VITRN	-0.156094	-0.108658	0.195347	0.0145248	0.072574	41.7151
6383-90_3	TLL1	0.121799	0.113294	0.195264	0.0145857	0.0726001	41.8903
3070-1_2	IL-2	1.14343	0.0898096	0.195139	0.0146776	0.0729311	42.1542
5480-49_3	RANTES	0.292645	0.254304	0.195056	0.0147392	0.0731104	42.3309
6545-58_3	PRIO	0.061928	0.0129777	0.194931	0.0148319	0.0734436	42.5973
9783-75_3	DJC11	0.0714896	0.054563	0.19489	0.014863	0.0734706	42.6864
4801-13_3	PERL	0.553381	0.111995	0.194433	0.0152082	0.075048	43.678
7089-42_3	SYT11	0.322038	0.0971426	0.194308	0.0153036	0.0752602	43.9519
7696-104_3	NBR1	-0.0253052	-0.0375104	0.194308	0.0153036	0.0752602	43.9519
4301-58_2	Thymidine kinase	-0.0443106	-0.0310936	0.194142	0.0154316	0.0757601	44.3197
8748-45_3	HG2A	1.57631	0.0648859	0.194059	0.015496	0.0759463	44.5045
5062-60_3	CD226	0.11273	0.0859848	0.193976	0.0155606	0.0761331	44.6901
7065-1_4	G6B	0.207301	0.186296	0.193685	0.0157887	0.0769153	45.3451
2570-72_5	IGFBP-2	0.18983	0.169057	0.193602	0.0158544	0.0769153	45.5338
6077-63_3	CECR1	0.170007	0.141379	0.193602	0.0158544	0.0769153	45.5338
8845-2_3	ATS3	-0.112556	-0.0579742	0.193644	0.0158215	0.0769153	45.4394
9748-31_3	GSTM3-3	-0.035865	-0.160797	0.193644	0.0158215	0.0769153	45.4394
9450-18_3	CDKA1	0.0498134	0.0641492	0.193519	0.0159204	0.0769752	45.7233
6530-63_3	PROL1	0.425537	0.0596879	0.193519	0.0159204	0.0769752	45.7233
5648-28_3	CTRB2	0.189983	0.214522	0.193477	0.0159534	0.0770055	45.8182
3480-7_1	DUS3	0.0924417	0.0751652	0.193436	0.0159866	0.0770359	45.9134
8619-12_3	CADM4	0.0756044	0.0563593	0.193311	0.0160863	0.0772574	46.1999
9180-6_3	INGR2	0.0250232	0.0270124	0.193311	0.0160863	0.0772574	46.1999
6468-37_3	TKN4	-0.116658	-0.027938	0.19327	0.0161197	0.0772885	46.2958
10563-13_3	LYSM3	-0.146597	-0.023031	0.193187	0.0161866	0.0774801	46.488
3290-50_2	CD109	-0.133446	-0.165846	0.192563	0.0166967	0.0796561	47.953
5725-1_3	OMD	-0.233259	-0.178095	0.192563	0.0166967	0.0796561	47.953
4834-61_2	Epithelial cell kinase	-0.139661	-0.0659985	0.192522	0.0167312	0.0796884	48.0521
2665-26_2	BCMA	0.0729869	0.108737	0.192439	0.0168004	0.0798855	48.2509
4355-13_1	DAPK2	0.191356	0.052028	0.192397	0.0168351	0.0799182	48.3505
9378-6_3	FBCD1	0.335646	0.0829181	0.192314	0.0169047	0.0801162	48.5504
9283-8_3	CD44	-0.0904202	-0.0925445	0.192231	0.0169746	0.0803147	48.751
7895-108_3	MRAP	0.0770697	0.0487264	0.192106	0.0170799	0.0805474	49.0534
2974-61_2	contactin-1	-0.0603556	-0.0642512	0.192106	0.0170799	0.0805474	49.0534
6927-7_3	NDST1	-0.0978	-0.0799834	0.192065	0.0171151	0.0805812	49.1545
9081-39_3	ZNT3	-0.235299	-0.0997195	0.191982	0.0171857	0.0807813	49.3574
8356-88_3	NEU1	0.0845537	-0.148911	0.19194	0.0172211	0.0808155	49.4591
9580-5_3	Laminin gamma-2	0.0607703	0.088063	0.191857	0.0172922	0.0808845	49.6631
10901-334_3	ITM2C	-0.00389429	0.0673266	0.191857	0.0172922	0.0808845	49.6631
8447-11_3	ghrelin	0.468456	0.106378	0.191774	0.0173634	0.0809542	49.8678
5108-72_3	Notch-3	-0.0571286	-0.103349	0.191774	0.0173634	0.0809542	49.8678
10551-7_3	LAT	0.82388	0.260538	0.191608	0.0175068	0.081227	50.2795
6255-74_3	CPXM1	0.0901996	0.0790038	0.191608	0.0175068	0.081227	50.2795
8484-24_3	Leptin	-0.321368	-0.274706	0.191649	0.0174709	0.081227	50.1763
8901-40_3	14-3-3 protein gamma	0.0379206	0.135355	0.190652	0.0183519	0.0841958	52.7066
3795-6_2	ADAM 9	-0.076286	0.107126	0.190694	0.0183144	0.0841958	52.5989
2638-12_2	M-CSF R	0.128701	0.0648511	0.190694	0.0183144	0.0841958	52.5989
6558-5_3	COL10	0.0596901	0.0519705	0.190735	0.018277	0.0841958	52.4914
8364-74_3	UST	0.276575	-0.0942844	0.190652	0.0183519	0.0841958	52.7066
8900-28_3	NEO1	-0.09675	-0.110878	0.190694	0.0183144	0.0841958	52.5989
10916-44_3	PLA2R	-0.23513	-0.131307	0.190735	0.018277	0.0841958	52.4914
4549-78_2	FUT5	0.0841436	0.182249	0.190278	0.0186923	0.0843167	53.6844
7852-9_3	IF3M	0.194044	0.164919	0.190403	0.0185782	0.0843167	53.3567
5034-79_1	Trypsin 2	0.23021	0.131193	0.190361	0.0186162	0.0843167	53.4657
8488-33_3	gpIIbIIIa	0.10086	0.130891	0.190486	0.0185025	0.0843167	53.1392
5133-17_3	TGF-b R II	-0.0474595	0.120974	0.190445	0.0185403	0.0843167	53.2478
7145-1_3	ITIH3	0.142152	0.112449	0.190403	0.0185782	0.0843167	53.3567
9539-25_3	EMID2	-0.308436	0.0987154	0.190278	0.0186923	0.0843167	53.6844
4910-21_1	GIB	0.132107	0.0836818	0.190237	0.0187305	0.0843167	53.7941
2775-54_2	IL-17F	-0.0795683	-0.0466107	0.19032	0.0186542	0.0843167	53.575
3481-87_1	XPNPEP1	-0.210932	-0.141436	0.190237	0.0187305	0.0843167	53.7941
10339-48_3	NSE	-0.271079	-0.171287	0.190569	0.018427	0.0843167	52.9225
7956-11_3	MOS1	-0.36989	-0.320075	0.190278	0.0186923	0.0843167	53.6844
9110-2_3	SYT17	0.0152253	0.0458161	0.190112	0.0188455	0.0845691	54.1242
9859-180_3	SSAT-1	0.704258	0.0311135	0.190112	0.0188455	0.0845691	54.1242
5071-3_3	Desmoglein-2	0.109659	0.0827088	0.189157	0.0197479	0.0883425	56.7159
10521-10_3	MXRA8	-0.104391	-0.0786867	0.189157	0.0197479	0.0883425	56.7159
8982-65_3	TSP3	-0.158122	-0.146909	0.189074	0.0198281	0.0885636	56.9464
2961-1_2	Protein C	-0.0275576	-0.0626956	0.18899	0.0199087	0.0887853	57.1777
10088-37_3	APT	0.301142	0.289362	0.188783	0.0201113	0.0894114	57.7598
5754-76_3	INSL6	-0.0671271	0.0850465	0.188783	0.0201113	0.0894114	57.7598
8806-18_3	NRN1	0.297279	0.0851141	0.188492	0.0203982	0.0898471	58.5835
10015-119_3	KCAB2	0.053645	0.0766234	0.188409	0.0204808	0.0898471	58.8208
5722-78_3	Prolylcarboxypeptidase	0.0499288	0.0764105	0.188367	0.0205222	0.0898471	58.9397
8081-55_3	PLD5	2.24876	0.0709825	0.188533	0.020357	0.0898471	58.4652
5095-7_3	KI2L4	0.0784677	0.0643422	0.18845	0.0204394	0.0898471	58.702
2781-63_2	LAG-1	1.01038	0.0553047	0.188492	0.0203982	0.0898471	58.5835
9350-3_3	FSTL4	-0.216285	-0.0492564	0.188575	0.0203158	0.0898471	58.3471
3218-8_2	PSMA	-0.0859984	-0.0802344	0.188575	0.0203158	0.0898471	58.3471
8660-33_3	OLFL3	-0.07502	-0.0934797	0.188409	0.0204808	0.0898471	58.8208
2819-23_2	Cadherin-5	-0.0981667	-0.141742	0.188367	0.0205222	0.0898471	58.9397
6533-20_3	DNS2B	0.332733	0.0429338	0.188243	0.0206469	0.0901183	59.2979
7789-182_3	PRDX4	0.0486642	0.036351	0.188243	0.0206469	0.0901183	59.2979
7866-11_3	DJC30	1.07169	-0.0141312	0.187453	0.0214525	0.0934923	61.6114
7735-17_3	PEDF	-0.0439991	-0.0543136	0.18737	0.0215389	0.0937267	61.8596
4139-71_2	IL-6 sRa	0.0975964	0.101855	0.187246	0.021669	0.0941505	62.2335
7064-2_4	VAMP8	0.0982244	0.0610042	0.187204	0.0217126	0.0941972	62.3586
7755-37_3	ITB5	-0.877148	-0.0669606	0.187162	0.0217562	0.0942441	62.4839
6497-10_3	XLRS1	0.0908792	0.0900463	0.187079	0.0218437	0.0944806	62.7351
4135-84_2	IgE	0.909524	0.836909	0.18683	0.0221081	0.0951939	63.4943
5734-13_3	nectin-4	0.41578	0.100089	0.18683	0.0221081	0.0951939	63.4943
2732-58_3	NANOG	0.00968483	0.0477054	0.186872	0.0220638	0.0951939	63.3672
7952-2_3	VTI1A	0.0464897	0.12742	0.186664	0.0222859	0.0958159	64.005
9002-36_3	SPA11	0.116115	0.0635023	0.186539	0.0224201	0.0962487	64.3904
7911-29_3	SCN4B	0.194247	0.0618739	0.186415	0.022555	0.0966834	64.7779
8804-39_3	COKA1	0.13019	0.103777	0.186332	0.0226453	0.0967817	65.0373
9986-14_3	Neuropeptide W	-0.843002	-0.0750491	0.186332	0.0226453	0.0967817	65.0373
9382-110_3	MO2R1	0.595128	-0.0552799	0.185667	0.0233797	0.0997717	67.1464
8086-49_3	ITM2B	0.110868	0.0264637	0.185625	0.0234262	0.0998222	67.2802
10612-18_3	PLOD3	0.191195	0.110993	0.185542	0.0235197	0.0999238	67.5485
3054-3_2	Haptoglobin, Mixed Type	0.27247	0.0559209	0.185542	0.0235197	0.0999238	67.5485
8318-13_3	SPRE1	0.166592	0.132201	0.185376	0.0237075	0.100277	68.088
9045-3_3	S27A2	-0.100664	-0.0595284	0.185418	0.0236604	0.100277	67.9528
2828-82_2	HAI-1	-0.0239532	-0.163858	0.185376	0.0237075	0.100277	68.088
5594-87_3	MESD2	0.0499787	0.0734358	0.185293	0.023802	0.100381	68.3592
4159-130_1	Factor H	0.0439089	0.0541723	0.185293	0.023802	0.100381	68.3592
3514-49_2	Proteinase-3	0.368463	0.280347	0.185168	0.0239442	0.100685	68.7678
8385-248_3	HGFA	-0.136222	-0.162231	0.185168	0.0239442	0.100685	68.7678
5355-69_3	LIGHT	0.280537	0.227055	0.184919	0.024231	0.100911	69.5915
6469-62_3	LY66D	1.95692	0.109691	0.185085	0.0240395	0.100911	69.0414
4245-80_2	MDM2	0.124617	0.0777805	0.184961	0.024183	0.100911	69.4536
8285-64_3	PACA	-0.125209	0.0745035	0.185044	0.0240872	0.100911	69.1785
5879-51_3	Dynactin subunit 2	0.0546888	0.0660912	0.184919	0.024231	0.100911	69.5915
9963-19_3	PCDBA	0.0543624	0.0605259	0.184877	0.0242791	0.100911	69.7296
3341-33_4	ABL1	0.0925199	0.0580527	0.184877	0.0242791	0.100911	69.7296
7923-41_3	SEM4C	-0.471695	-0.0889659	0.184877	0.0242791	0.100911	69.7296
7014-27_3	LRC19	0.0052368	0.0821162	0.184794	0.0243755	0.10102	70.0066
6594-64_3	SMDC1	0.0368718	0.0393129	0.184794	0.0243755	0.10102	70.0066
9917-16_3	KIRR2	0.270845	0.101208	0.184753	0.0244239	0.101074	70.1454
4866-59_2	TrkB	-0.321752	-0.0652715	0.184047	0.0252589	0.104229	72.5436
5358-3_3	OMD	-0.238573	-0.271826	0.184047	0.0252589	0.104229	72.5436
8099-42_3	SPON2	0.102799	0.0685833	0.184005	0.0253088	0.104285	72.6869
3585-54_4	BASI	0.0934689	0.0964719	0.183714	0.0256605	0.104297	73.697
5653-23_3	PRS37	0.0624335	0.0921195	0.183922	0.0254089	0.104297	72.9742
8480-29_3	FBLN3	0.0721364	0.0771571	0.18388	0.025459	0.104297	73.1183
10425-3_3	B4GT5	-0.828781	0.0690519	0.183797	0.0255596	0.104297	73.4071
10616-67_3	PDXL2	0.316372	0.0680582	0.183756	0.02561	0.104297	73.552
8017-23_3	FXRD1	0.263911	0.0654577	0.18388	0.025459	0.104297	73.1183
9463-26_3	CDHR3	0.169662	0.0583572	0.183714	0.0256605	0.104297	73.697
6504-65_3	Lysyl oxidase-like protein 2	0.116878	0.056857	0.183922	0.0254089	0.104297	72.9742
2609-59_2	Cystatin C	-0.0374402	-0.0538286	0.183839	0.0255093	0.104297	73.2626
7215-18_3	NADH-cytochrome b5 reductase	-0.0053599	-0.0705308	0.183673	0.0257111	0.104297	73.8423
8028-22_3	SPINK5	-0.0843859	-0.125925	0.183673	0.0257111	0.104297	73.8423
4815-25_3	TXD12	0.165942	0.130117	0.183631	0.0257618	0.104355	73.9879
8074-32_3	TMM70	0.130618	0.217932	0.183299	0.0261705	0.104451	75.1617
6645-53_3	Periostin	0.106989	0.162672	0.18334	0.0261191	0.104451	75.014
3315-15_1	GPC2	0.0574807	0.100064	0.18334	0.0261191	0.104451	75.014
9830-109_3	VAV3	0.0575141	0.0762184	0.183548	0.0258634	0.104451	74.2798
7123-25_3	RM52	0.163528	0.0672919	0.183548	0.0258634	0.104451	74.2798
3401-8_2	TCPTP	-0.0671713	-0.0384025	0.183257	0.026222	0.104451	75.3095
4563-61_2	PLCG1	-0.0758976	-0.0466869	0.183465	0.0259654	0.104451	74.5727
9369-174_3	NGL1	-0.114812	-0.0688571	0.183465	0.0259654	0.104451	74.5727
2752-62_2	BMP-14	-0.432013	-0.0805876	0.183299	0.0261705	0.104451	75.1617
5632-6_3	CRAC1	-0.104109	-0.0997066	0.18334	0.0261191	0.104451	75.014
9088-20_3	SL9B2	-0.0308415	-0.200708	0.183257	0.026222	0.104451	75.3095
7918-114_3	Amylase, alpha 1A	-0.164881	-0.216868	0.183382	0.0260678	0.104451	74.8667
5106-52_3	NOTC2	-0.837816	0.0673692	0.183216	0.0262736	0.104512	75.4577
7935-26_3	LARGE	-0.117667	-0.10864	0.183174	0.0263252	0.104573	75.606
6974-6_3	HG2A	-0.0614362	0.0825691	0.183049	0.0264808	0.1049	76.0527
6434-18_3	Amine oxidase	-0.477715	-0.229769	0.183049	0.0264808	0.1049	76.0527
7751-121_3	SARP-1	0.286352	0.088552	0.182426	0.0272707	0.107881	78.3215
6402-8_3	PILRA	0.042397	0.101244	0.182343	0.0273776	0.108155	78.6284
3213-65_2	Nidogen	0.147875	0.0630993	0.182135	0.0276464	0.109067	79.4005
10630-5_3	HTAI2	-0.11407	-0.0351698	0.182094	0.0277005	0.10913	79.5557
9039-47_3	TOIP1	-0.0909993	-0.123013	0.182052	0.0277546	0.109193	79.7112
4246-40_2	NCAM-L1	-0.0435101	-0.136377	0.182011	0.0278088	0.109257	79.867
6416-8_3	GKN2	0.0520491	0.221945	0.181928	0.0279176	0.1093	80.1793
6466-7_3	SPAC7	0.200107	0.0816346	0.181969	0.0278632	0.1093	80.023
9867-23_3	F16P2	-0.577978	-0.13225	0.181886	0.0279721	0.1093	80.3359
9004-24_3	CR001	-0.112147	-0.196849	0.181886	0.0279721	0.1093	80.3359
7809-22_3	SPAT9	-0.145063	0.155424	0.181803	0.0280814	0.10933	80.6498
3831-21_1	pTEN	0.479135	0.127723	0.181762	0.0281362	0.10933	80.8072
10014-31_3	SLUG	-0.680696	0.103618	0.18172	0.0281911	0.10933	80.9648
5614-44_3	CRH	0.296982	0.0682203	0.181678	0.0282461	0.10933	81.1227
2822-56_2	CD97	-0.0690299	-0.0590827	0.181803	0.0280814	0.10933	80.6498
5316-54_3	Prothrombin	-0.0456566	-0.0811961	0.181678	0.0282461	0.10933	81.1227
5758-49_3	kallikrein 9	-0.0822374	-0.0932657	0.18172	0.0281911	0.10933	80.9648
4332-6_2	CLC1B	0.183401	0.135222	0.181471	0.0285224	0.110251	81.9164
3728-52_2	Secretin	0.391384	0.024005	0.181305	0.0287452	0.110963	82.5562
8348-4_3	EPHB2	-0.0562339	-0.0316412	0.180557	0.0297668	0.114752	85.4904
10902-53_3	APRV1	-0.17862	-0.125382	0.180515	0.0298245	0.11482	85.6561
8858-21_3	BATF3	0.0767451	0.0288498	0.180432	0.0299402	0.115111	85.9883
3379-29_1	KPCI	-0.115338	0.0784898	0.180307	0.0301144	0.115165	86.4887
9106-87_3	LYSM4	0.158403	0.0511425	0.180349	0.0300563	0.115165	86.3216
3646-7_4	TEC	0.0850223	0.0163029	0.180391	0.0299982	0.115165	86.1548
7808-5_3	GLCE	-0.026827	-0.0763493	0.180307	0.0301144	0.115165	86.4887
3611-70_4	Endothelin-converting enzyme 1	0.0950418	0.112074	0.180266	0.0301727	0.115234	86.656
9916-146_3	LRC4B	-0.0455971	-0.233823	0.180224	0.0302311	0.115304	86.8237
2211-9_6	TIMP-1	0.0897429	0.0804563	0.180141	0.0303481	0.115597	87.1599
6493-9_3	CBPZ	0.282521	0.105129	0.1801	0.0304068	0.115667	87.3284
3197-70_2	IDE	-0.054782	-0.0448265	0.180058	0.0304656	0.115737	87.4972
2505-49_3	GFRa-3	0.018101	0.0551768	0.179934	0.0306425	0.115949	88.0053
9876-20_3	aldolase C	-0.10835	-0.104752	0.179934	0.0306425	0.115949	88.0053
9288-7_3	FKBP7	-0.258	-0.121505	0.179975	0.0305835	0.115949	87.8357
9979-13_3	AMGO1	0.18032	0.159597	0.17985	0.030761	0.116011	88.3455
4983-6_1	ERP29	0.118188	0.123398	0.179809	0.0308204	0.116011	88.5161
9347-13_3	TIP	0.00354825	0.107418	0.17985	0.030761	0.116011	88.3455
9927-96_3	TENS4	-0.160656	0.0722798	0.179809	0.0308204	0.116011	88.5161
3414-40_2	BMX	0.0676272	0.0399788	0.179767	0.0308798	0.116082	88.6869
9804-11_3	CO9A2	-0.489008	-0.201669	0.17956	0.0311788	0.117053	89.5454
7786-83_3	CLC2B	1.17269	0.053131	0.178812	0.032276	0.120856	92.6967
3122-6_2	SMAC	-0.00952591	0.0137545	0.178812	0.032276	0.120856	92.6967
4342-10_3	sICAM-1	0.0480487	0.0452501	0.17877	0.032338	0.120931	92.8746
6634-4_3	NET1	0.147297	0.0398687	0.178729	0.0324	0.121005	93.0528
7827-20_3	ADA32	0.548303	0.0749869	0.178687	0.0324622	0.12108	93.2313
5487-7_3	SLAF7	0.132621	0.129597	0.178521	0.0327118	0.12138	93.9483
4886-3_1	MCP-3	-0.204644	0.112185	0.178521	0.0327118	0.12138	93.9483
3362-61_2	CRDL1	0.0277946	-0.00780702	0.178521	0.0327118	0.12138	93.9483
7826-1_3	DCLK3	-0.204749	-0.0689804	0.178521	0.0327118	0.12138	93.9483
5252-33_3	PDE11	0.0700738	0.0775184	0.178396	0.0329002	0.121922	94.4893
8092-29_3	IL-6 sRa	0.100558	0.096468	0.178355	0.0329632	0.121998	94.6702
8286-44_3	UPK3B	0.275158	0.0824159	0.178313	0.0330263	0.122074	94.8514
8469-41_3	IGFBP-2	0.122635	0.176869	0.17823	0.0331528	0.122384	95.2148
7803-4_3	CHST1	0.0381888	-0.0651425	0.178106	0.0333433	0.12293	95.7621
3888-8_1	ING1	0.0664825	0.0361578	0.178064	0.0334071	0.123007	95.9451
8484-8_3	Leptin	-0.180449	-0.146364	0.177981	0.0335349	0.123319	96.3122
5509-7_3	EGF	0.101187	0.0736521	0.177939	0.0335989	0.123397	96.4961
7740-33_3	FATE1	0.0262349	0.046799	0.177898	0.0336631	0.123474	96.6804
9027-10_3	NLGN2	-0.0375683	0.0303662	0.177815	0.0337918	0.123788	97.0499
8248-222_3	SIG14	0.0507344	-0.00393208	0.17715	0.0348366	0.127453	100.051
9840-2_3	Cdc42Hs	0.110298	0.164073	0.176942	0.0351689	0.127697	101.005
9950-229_3	LAG-3	0.12295	0.140802	0.176776	0.0354367	0.127697	101.774
10346-5_3	STAT3	0.0643495	0.080291	0.176859	0.0353026	0.127697	101.389
4978-54_2	DBNL	0.106067	0.0791422	0.176818	0.0353696	0.127697	101.581
9037-1_3	STX18	-0.275842	0.062196	0.176984	0.0351022	0.127697	100.814
2796-62_2	Fibrinogen	0.0640634	0.0567447	0.176818	0.0353696	0.127697	101.581
9255-5_3	IL-17C	-1.25645	0.054305	0.176776	0.0354367	0.127697	101.774
8758-2_3	PCDA7	0.258284	0.0514021	0.176984	0.0351022	0.127697	100.814
7887-57_3	COX5B	-0.221486	0.0512919	0.177025	0.0350357	0.127697	100.622
9900-36_3	NFH	-0.206777	-0.0526976	0.176942	0.0351689	0.127697	101.005
3443-61_2	HIPK3	-0.0599112	-0.0837447	0.176901	0.0352357	0.127697	101.197
11516-7_3	FABPL	-0.0282542	-0.145625	0.176859	0.0353026	0.127697	101.389
3845-51_2	DLRB1	0.191857	0.0961388	0.176735	0.035504	0.127779	101.967
8470-213_3	RNase H1	-0.769329	0.103981	0.17661	0.0357063	0.128026	102.549
3640-14_3	RAP	-0.101197	0.0749804	0.17661	0.0357063	0.128026	102.549
3676-15_3	IGF-II receptor	0.0120305	0.0649631	0.176651	0.0356388	0.128026	102.354
6913-189_3	HMG-2	0.369604	0.262234	0.176402	0.0360458	0.128049	103.524
4234-8_2	IL-1 R4	0.11121	0.199122	0.176361	0.0361141	0.128049	103.72
2789-26_2	MMP-7	0.0994214	0.102474	0.176527	0.0358418	0.128049	102.938
5936-53_3	TNF-a	0.0845992	0.0656721	0.176485	0.0359097	0.128049	103.133
10085-25_3	STAR	0.0859924	0.0442012	0.176444	0.0359777	0.128049	103.328
8289-8_3	GPNMB	-0.072304	-0.0702731	0.176361	0.0361141	0.128049	103.72
5726-49_3	SG11A	-0.126037	-0.0759042	0.176361	0.0361141	0.128049	103.72
5015-15_1	PAFAH	-0.107025	-0.140021	0.176527	0.0358418	0.128049	102.938
7015-8_3	LIRB5	-0.126113	-0.196002	0.176402	0.0360458	0.128049	103.524
6070-11_3	QSCN6	0.0511256	0.0218677	0.176194	0.0363882	0.128862	104.507
5526-53_3	GITR	-0.0373026	0.0766925	0.176028	0.0366641	0.129679	105.299
8051-10_3	AGGF1	-0.0222644	0.00563131	0.175364	0.0377862	0.133483	108.522
8088-56_3	CA210	0.0933469	0.0502845	0.17528	0.0379286	0.133657	108.931
8955-60_3	GL8D1	0.106336	0.0285486	0.17528	0.0379286	0.133657	108.931
6342-10_3	Nephronectin	0.29713	0.062248	0.175239	0.0379999	0.133745	109.136
3351-1_1	CAMK2B	0.217274	0.167817	0.175114	0.0382147	0.134008	109.753
9028-5_3	PAPD1	-0.271657	-0.0301304	0.175156	0.038143	0.134008	109.547
4498-62_2	NCAM-120	-0.120417	-0.0322909	0.175114	0.0382147	0.134008	109.753
7795-14_3	NKG2E	-0.450426	-0.145885	0.17499	0.0384305	0.1346	110.372
9380-2_3	sPLA(2)-XIII	-0.0612079	-0.115387	0.174823	0.0387199	0.135449	111.204
10704-91_3	LRMP	-0.159588	0.145939	0.174699	0.0389382	0.135568	111.831
5834-18_3	IL-9	0.0335208	0.103509	0.174657	0.0390112	0.135568	112.04
5721-1_3	CD226	0.118428	0.0818356	0.174657	0.0390112	0.135568	112.04
7806-33_3	B4GT7	0.0704085	0.0794476	0.174616	0.0390843	0.135568	112.25
7821-6_3	C1D	0.239371	0.0612374	0.174616	0.0390843	0.135568	112.25
3078-1_2	PlGF	-0.453763	0.0368731	0.17474	0.0388653	0.135568	111.621
7779-86_3	CHSTB	0.0506478	0.034869	0.174699	0.0389382	0.135568	111.831
5085-18_3	IL-20 Ra	0.208657	0.0493771	0.17445	0.039378	0.136422	113.094
5456-59_2	CNDP1	-0.171501	-0.142804	0.174408	0.0394518	0.136513	113.305
5096-51_3	KI3L2	-0.233133	0.0797888	0.174283	0.0396737	0.137115	113.943
10675-223_3	TMX2	0.182864	0.0505974	0.173619	0.0408756	0.141099	117.395
9261-14_3	EphB6	-0.0370545	-0.0600746	0.173536	0.0410281	0.141286	117.833
3397-7_4	SHP-2	-0.0832706	-0.0856054	0.173536	0.0410281	0.141286	117.833
5744-12_3	CA056	0.115149	-0.074862	0.173494	0.0411045	0.14138	118.052
4217-49_3	ERAB	0.0981436	0.0631516	0.173369	0.0413345	0.142001	118.713
4718-5_2	PPIB	0.122764	0.116294	0.173328	0.0414114	0.14202	118.933
5748-20_3	Acid ceramidase	0.0706536	0.0735831	0.173286	0.0414884	0.14202	119.155
5846-24_3	Noggin	0.159453	0.0654293	0.173286	0.0414884	0.14202	119.155
6407-63_3	LAD1	-0.182834	0.170943	0.173037	0.0419532	0.143145	120.49
9219-70_3	NENF	-0.0141493	0.151551	0.172912	0.0421873	0.143145	121.162
5228-25_2	KIF23	0.00822923	0.0770153	0.172912	0.0421873	0.143145	121.162
4130-71_1	FGF-6	0.0205484	0.0717143	0.172995	0.0420311	0.143145	120.713
8079-39_3	EID3	-0.0823322	0.0664289	0.172871	0.0422656	0.143145	121.387
10689-5_3	DB119	-0.0779974	0.0632972	0.172954	0.0421092	0.143145	120.938
5738-25_3	SP-C	0.0655501	0.059834	0.172871	0.0422656	0.143145	121.387
7110-2_3	DJB11	0.0518509	0.0513814	0.172995	0.0420311	0.143145	120.713
2853-68_2	CHK1	-0.191072	-0.0290534	0.172954	0.0421092	0.143145	120.938
6267-51_3	STMN4	0.151688	0.0708856	0.172829	0.042344	0.143242	121.612
2597-8_3	VEGF	0.0560862	0.0443084	0.172705	0.04258	0.143799	122.29
7865-126_3	HRSL3	-0.0562473	0.0280639	0.172663	0.042659	0.143799	122.517
10695-12_3	WF10B	-0.244614	-0.0402478	0.172663	0.042659	0.143799	122.517
5602-62_3	RNS10	-0.0310557	0.0346852	0.172538	0.0428965	0.14443	123.199
5882-34_2	EF-1-beta	0.529751	0.0791522	0.172497	0.0429759	0.144528	123.427
10816-150_3	PILRA	0.807875	0.123658	0.17204	0.0438582	0.147322	125.961
4153-11_2	alpha-1-antichymotrypsin complex	0.217495	0.211377	0.171832	0.0442643	0.14834	127.127
9015-1_3	PRG3	0.11573	0.00750267	0.171832	0.0442643	0.14834	127.127
10640-9_3	TOIP2	0.0820801	0.0724135	0.171791	0.044346	0.14844	127.362
7267-2_3	LCB2	-0.0241698	0.0413084	0.171749	0.0444277	0.148541	127.596
9074-6_3	CE004	0.0129129	0.0422029	0.171583	0.0447561	0.149465	128.539
9568-289_3	FCAMR	1.95494	0.202661	0.1715	0.044921	0.149494	129.013
10626-116_3	SIA7C	-0.440508	-0.0675047	0.1715	0.044921	0.149494	129.013
4309-59_3	Triosephosphate isomerase	-0.0247612	-0.0995916	0.171541	0.0448385	0.149494	128.776
2579-17_5	MMP-9	0.24469	0.246051	0.171417	0.0450865	0.149871	129.489
7770-25_3	NFU1	0.0285746	0.0636469	0.171334	0.0452526	0.150005	129.965
5534-49_2	TRAIL R2	-0.0383366	0.0585292	0.171292	0.0453358	0.150005	130.204
8336-267_3	GRM1C	-0.0359614	0.0404975	0.171334	0.0452526	0.150005	129.965
5110-84_3	NRX1B	-0.171452	-0.0675392	0.171292	0.0453358	0.150005	130.204
7106-37_3	PLACL	0.067095	0.0392426	0.171043	0.0458378	0.151492	131.646
3809-1_2	FGFR-3	-0.0534494	0.00811751	0.170794	0.0463447	0.152991	133.102
5613-75_3	NTAL	0.276425	0.0263717	0.170752	0.0464296	0.153095	133.346
6998-106_3	HAAH	0.179473	0.0232486	0.170212	0.0475463	0.156597	136.553
8078-15_3	CF226	0.114057	0.0734399	0.170087	0.0478073	0.156845	137.302
9171-11_3	CSRP3	0.0635863	-0.0321265	0.170087	0.0478073	0.156845	137.302
2636-10_2	Lymphotoxin b R	-0.0348603	-0.0368363	0.170087	0.0478073	0.156845	137.302
3200-49_2	kallikrein 13	-0.122469	-0.0662724	0.170046	0.0478945	0.156845	137.553
4162-54_2	Transferrin	-0.0659499	-0.0722933	0.170046	0.0478945	0.156845	137.553
7785-1_3	Ephrin-B3	-0.185469	-0.111752	0.169963	0.0480695	0.157239	138.055
4475-60_3	ZAP70	0.0621214	0.0812149	0.169921	0.0481571	0.157346	138.307
4968-50_1	CAPG	-0.112736	0.143133	0.169796	0.048421	0.157492	139.065
8969-49_3	CD14	0.249123	0.0753099	0.169796	0.048421	0.157492	139.065
4559-64_2	KYNU	0.00711756	0.0723849	0.169838	0.0483329	0.157492	138.812
3009-3_2	TGF-b R III	-0.0634221	-0.0850508	0.169796	0.048421	0.157492	139.065
4719-58_2	Protein disulfide isomerase A3	0.0943417	0.0937257	0.169672	0.0486861	0.157749	139.827
8085-10_3	FCRL2	-0.389246	0.0844804	0.16963	0.0487748	0.157749	140.081
6899-37_3	PHS2	-0.101601	0.0365915	0.16963	0.0487748	0.157749	140.081
2526-53_3	OPG	-0.106874	-0.086833	0.169713	0.0485976	0.157749	139.572
9338-2_3	DCBD2	-0.0762458	-0.105469	0.169672	0.0486861	0.157749	139.827
2441-2_4	FGF-10	-0.0472338	0.0401481	0.169589	0.0488636	0.157858	140.336
10036-201_3	ZHX3	0.0793498	0.0827815	0.169506	0.0490416	0.158078	140.847
7640-29_3	LRP1B	-0.047671	-0.0564031	0.169506	0.0490416	0.158078	140.847
8462-18_3	HGH	0.200797	0.0611741	0.169464	0.0491308	0.158188	141.104
9787-23_3	COLEC12	-0.341536	-0.0431351	0.169423	0.0492201	0.158298	141.36
3115-64_2	MK01	0.339262	0.0715853	0.169298	0.049489	0.158807	142.133
9030-56_3	CQ089	0.474061	0.0624818	0.169298	0.049489	0.158807	142.133
8998-15_3	HS3S4	-0.238978	-0.0359377	0.169132	0.0498496	0.159786	143.168
6334-9_3	GGT2	-0.0696406	-0.0383611	0.16909	0.04994	0.159897	143.428
7070-25_4	KELL	0.144727	-0.0264899	0.169049	0.0500307	0.160009	143.688
9054-8_3	F174B	-0.0021558	0.0646492	0.169007	0.0501214	0.160121	143.949
9793-145_3	IGDC4	-0.0720888	-0.0504677	0.168592	0.0510369	0.162865	146.578
9769-48_3	DNER	-0.337488	-0.117413	0.168509	0.0512217	0.163273	147.109
9267-2_3	CBPA4	-0.101554	0.0497278	0.168467	0.0513144	0.163387	147.375
2768-56_2	Hemopexin	0.27356	0.282701	0.168218	0.0518732	0.163471	148.98
2637-77_2	Macrophage mannose receptor	0.138474	0.095298	0.168218	0.0518732	0.163471	148.98
5490-53_3	Testican-1	0.0590772	0.0649856	0.168176	0.0519668	0.163471	149.249
6940-18_3	JPH1	0.0571177	0.0514011	0.168259	0.0517797	0.163471	148.711
5178-5_3	PDE7A	0.295562	0.0477008	0.168425	0.0514072	0.163471	147.641
7016-12_3	GCNT1	-0.0651075	0.0466748	0.168259	0.0517797	0.163471	148.711
4831-4_2	sL-Selectin	0.050981	0.0453417	0.168342	0.0515931	0.163471	148.175
8933-84_3	MEF2C	-0.128377	0.0250597	0.168342	0.0515931	0.163471	148.175
2960-66_2	Properdin	-0.0428436	-0.0730735	0.168259	0.0517797	0.163471	148.711
5090-49_2	ILT-2	-0.0964391	-0.119711	0.168342	0.0515931	0.163471	148.175
8231-122_3	VEGF sR1	0.353197	-0.152144	0.168176	0.0519668	0.163471	149.249
4712-28_2	Apo D	0.0535076	0.1269	0.168093	0.0521546	0.163882	149.788
9099-19_3	SYT5	0.285579	0.113175	0.16801	0.0523429	0.164114	150.329
9265-10_3	GLIP1	0.214027	0.0735261	0.16801	0.0523429	0.164114	150.329
3350-53_2	CAMK2A	0.0234898	0.0821544	0.167968	0.0524372	0.164231	150.6
2728-62_2	Laminin	-0.0836596	-0.0637701	0.167927	0.0525318	0.164348	150.871
8107-12_3	TM234	-0.576537	0.0892745	0.167844	0.0527213	0.164403	151.415
9445-44_3	CS018	-0.121065	0.0591754	0.167844	0.0527213	0.164403	151.415
7872-5_3	NUDT8	0.083808	0.054063	0.167844	0.0527213	0.164403	151.415
5679-16_3	HBD-3	0.0154978	0.0359186	0.167802	0.0528162	0.164521	151.688
3509-1_1	MIP-5	-0.131143	-0.0703893	0.167761	0.0529113	0.164638	151.961
9561-21_3	CSPG2	0.114759	-0.00957037	0.167719	0.0530066	0.164756	152.235
3503-4_2	Integrin a1b1	0.0758884	-0.0570488	0.167678	0.053102	0.164875	152.509
2844-53_2	sTie-1	0.0944624	0.11752	0.167595	0.0532932	0.16529	153.058
8065-245_3	PATE4	-0.0935699	0.0181772	0.167511	0.0534851	0.165706	153.609
5068-54_3	CRTAM	0.536271	0.0349733	0.16747	0.0535812	0.165825	153.885
6929-10_3	SIA8C	0.949689	0.118135	0.166764	0.0552387	0.17077	158.646
6472-40_3	GP100	-0.00481386	-0.0234954	0.166639	0.0555357	0.17132	159.499
4122-12_2	discoidin domain receptor 1	0.0563638	-0.0723775	0.166639	0.0555357	0.17132	159.499
7185-29_3	GPV	0.143857	0.0692633	0.166556	0.0557345	0.171748	160.069
10961-15_3	TIG3	0.217606	0.0510844	0.166514	0.0558341	0.171871	160.356
5909-51_3	Nucleoside diphosphate kinase A	0.316422	0.102285	0.166431	0.0560338	0.171873	160.929
3033-57_1	Galectin-2	1.01596	0.0786068	0.16639	0.0561339	0.171873	161.217
4593-11_1	PACAP-27	0.0488818	0.0736343	0.166431	0.0560338	0.171873	160.929
7950-142_3	BTNL9	0.0424783	0.0674735	0.16639	0.0561339	0.171873	161.217
5482-61_3	RBP	0.0226924	-0.0676109	0.166473	0.0559339	0.171873	160.642
8816-44_3	ARMC5	0.0419273	0.0688205	0.166348	0.0562341	0.171996	161.504
7824-88_3	MSRB3	0.0146731	0.101395	0.166307	0.0563345	0.17212	161.793
4988-49_2	FGFR4	-1.86144	0.151981	0.166224	0.0565357	0.172368	162.371
10666-7_3	GNPTG	-0.0349022	-0.0342209	0.166224	0.0565357	0.172368	162.371
7943-16_3	CUZD1	0.0147583	-0.0548891	0.166182	0.0566366	0.172492	162.66
3854-24_1	NACA	0.167225	0.0704454	0.16614	0.0567376	0.172617	162.95
5915-58_3	PEX5	-0.936763	0.122555	0.166057	0.0569401	0.172684	163.532
7265-32_3	OSTN	-0.55861	0.0697131	0.166057	0.0569401	0.172684	163.532
5584-21_3	Holo-TC II	0.0673081	0.0527793	0.166057	0.0569401	0.172684	163.532
5020-50_1	phosphoglycerate kinase 1	0.151219	0.0749097	0.166016	0.0570415	0.172809	163.823
4693-72_2	3HIDH	-0.175347	-0.0757022	0.165974	0.0571432	0.172935	164.115
9993-11_3	ZN264	0.122288	0.0330543	0.165933	0.0572449	0.17306	164.407
9439-454_3	CB082	-0.296899	0.00167247	0.1656	0.0580648	0.17517	166.762
3169-70_2	IDUA	-0.340955	-0.158796	0.1656	0.0580648	0.17517	166.762
4564-2_2	PLXC1	0.0457997	0.0723938	0.165102	0.0593135	0.178562	170.348
8830-29_3	F175B	1.21172	0.0334333	0.165102	0.0593135	0.178562	170.348
6593-5_3	GALT3	0.135579	0.0276561	0.16506	0.0594185	0.178691	170.65
4832-75_2	TRAIL R1	0.0665059	0.0850334	0.165019	0.0595238	0.17882	170.952
2585-2_5	PRL	0.748058	0.104059	0.164936	0.0597348	0.179267	171.558
3535-84_1	DKK1	0.138361	0.107078	0.164894	0.0598405	0.179397	171.862
8776-10_3	ERLN1	0.313751	0.035154	0.164853	0.0599464	0.179527	172.166
2780-35_2	Lactoferrin	0.0836495	0.196319	0.164603	0.0605851	0.179752	174
4125-52_2	sRAGE	0.0923788	0.165551	0.164686	0.0603715	0.179752	173.387
9058-1_3	TIM21	0.122201	0.0926352	0.164645	0.0604782	0.179752	173.693
8767-44_3	Endothelin-converting enzyme 1	0.248072	0.0803963	0.164645	0.0604782	0.179752	173.693
5280-68_5	GHC2	0.103445	0.05586	0.164728	0.060265	0.179752	173.081
2693-20_3	OSM	-0.055437	-0.0420962	0.164769	0.0601586	0.179752	172.776
4906-35_1	Coagulation Factor V	-0.0268448	-0.0477174	0.164728	0.060265	0.179752	173.081
2630-12_2	IL-1 R AcP	-0.143036	-0.140357	0.164603	0.0605851	0.179752	174
9303-9_3	B7-H2	-0.12317	-0.141259	0.164603	0.0605851	0.179752	174
3419-49_2	CAMK2D	-0.0592396	0.109491	0.164437	0.0610141	0.18028	175.233
3072-4_2	IL-13	0.0237883	0.0554179	0.164437	0.0610141	0.18028	175.233
10562-42_3	NETO2	-0.389952	-0.0696351	0.164437	0.0610141	0.18028	175.233
10677-9_3	NDUB4	-0.101556	-0.0992423	0.164437	0.0610141	0.18028	175.233
3028-36_2	Ck-b-8-1	0.109922	0.146651	0.164354	0.0612296	0.18036	175.851
7842-52_3	SERF1	-0.0702335	0.0569095	0.164354	0.0612296	0.18036	175.851
5468-67_3	IL-17 RC	-0.521401	-0.0626393	0.164354	0.0612296	0.18036	175.851
5939-42_3	TWEAK	-0.117986	-0.0418549	0.164271	0.0614458	0.180812	176.472
6363-55_3	DB124	-0.0516972	0.0969074	0.164188	0.0616625	0.181079	177.095
8046-9_3	Galectin-1	-0.402333	-0.0985479	0.164188	0.0616625	0.181079	177.095
7143-9_3	GNT2C	0.0405686	0.0172816	0.163939	0.0623169	0.182813	178.974
2475-1_3	SCF sR	-0.0872412	-0.0578673	0.163482	0.0635319	0.186187	182.464
6221-1_3	ADPGK	0.0107303	-0.0160454	0.163315	0.0639787	0.187306	183.747
7991-54_3	IQCF1	0.00612377	0.0635327	0.163108	0.064541	0.188759	185.362
6557-50_3	LRC15	-0.161914	-0.132693	0.163066	0.064654	0.188897	185.686
7916-10_3	S100A7	0.148675	0.0304136	0.163025	0.0647671	0.189036	186.011
9365-91_3	EYS	0.702042	0.114234	0.162941	0.0649939	0.189336	186.662
5275-28_2	VAV	0.192028	0.113789	0.162775	0.0654495	0.189336	187.971
8807-13_3	SNX1	0.202403	0.0573421	0.162817	0.0653353	0.189336	187.643
9012-1_3	PRP6	0.221483	0.0504165	0.162651	0.0657929	0.189336	188.957
10959-125_3	BET1L	0.0989806	0.0477741	0.162692	0.0656783	0.189336	188.628
3709-4_2	ALT	-0.0488064	-0.0264221	0.162651	0.0657929	0.189336	188.957
6555-58_3	Stomatin-like protein 2	0.0526728	-0.0363119	0.162817	0.0653353	0.189336	187.643
2278-61_4	TIMP-2	-0.0370292	-0.0430747	0.162692	0.0656783	0.189336	188.628
6963-82_3	SELPL	-0.119122	-0.07624	0.162858	0.0652213	0.189336	187.316
7933-75_3	ADA22	-1.16709	-0.0796287	0.162817	0.0653353	0.189336	187.643
6629-3_3	HBD-1	-0.0486517	-0.0806225	0.162651	0.0657929	0.189336	188.957
8296-117_3	KDEL2	-0.128266	-0.0910152	0.162858	0.0652213	0.189336	187.316
8891-7_3	CPVL	-0.415971	-0.121633	0.162692	0.0656783	0.189336	188.628
5231-79_3	PCSK9	-0.0815869	-0.138271	0.1629	0.0651075	0.189336	186.989
2857-70_2	Glucocorticoid receptor	0.0122751	0.134152	0.162484	0.0662533	0.190421	190.279
7921-65_3	FJX1	0.271724	0.0515384	0.162443	0.0663688	0.190421	190.611
4150-75_2	Plasmin	-0.374256	0.0306266	0.162443	0.0663688	0.190421	190.611
4294-16_2	Sphingosine kinase 1	0.127945	0.140124	0.162277	0.0668326	0.19156	191.943
5223-59_3	GCKR	-0.131235	0.0309246	0.162235	0.066949	0.191702	192.277
11089-7_3	IgA	0.233537	0.0610817	0.161654	0.0685965	0.196124	197.009
2516-57_3	6Ckine	0.057267	0.0564511	0.161612	0.0687155	0.196124	197.351
7787-25_3	LIRA5	0.102695	0.00364734	0.16157	0.0688346	0.196124	197.693
6408-2_3	INHBC	-0.0998854	-0.0855949	0.161612	0.0687155	0.196124	197.351
6359-50_3	AGO61	-0.427233	-0.0978401	0.16157	0.0688346	0.196124	197.693
3627-71_4	MMEL2	0.09531	0.0153173	0.161487	0.0690735	0.19661	198.379
10351-51_3	IRF1	-0.574323	-0.0850366	0.161446	0.0691932	0.196755	198.723
5353-89_2	IL-1Ra	0.0375016	0.0848464	0.161363	0.0694331	0.197242	199.412
7268-12_3	IFNA4	0.018	0.0736147	0.161321	0.0695533	0.19734	199.757
4212-5_3	EP15R	0.00137311	0.0566268	0.16128	0.0696737	0.19734	200.103
5430-66_3	SHPS1	-0.101099	-0.0503284	0.16128	0.0696737	0.19734	200.103
3050-7_2	vWF	-0.0704266	-0.109207	0.161197	0.069915	0.197829	200.796
8824-2_3	PSMD1	1.7279	0.114659	0.161155	0.070036	0.197976	201.143
9942-2_3	NXT1	0.221963	0.0457033	0.160906	0.0707653	0.199841	203.238
3293-2_4	CD5L	0.0595708	0.149611	0.160823	0.0710099	0.200138	203.94
2730-58_2	MICA	-0.0745625	-0.0858468	0.160823	0.0710099	0.200138	203.94
4480-59_2	C3b	0.266994	0.284568	0.160615	0.0716243	0.201277	205.705
4909-68_1	Galectin-8	-0.186766	0.0241689	0.160615	0.0716243	0.201277	205.705
8798-29_3	GOLM1	-0.310566	-0.067238	0.160615	0.0716243	0.201277	205.705
8787-21_3	FA96A	0.0978624	0.0355187	0.16049	0.0719952	0.202121	206.77
9566-103_3	LEPR	1.34322	0.0195112	0.160033	0.073369	0.205777	210.716
3367-8_3	FETUB	0.173244	0.0436402	0.159909	0.0737475	0.206637	211.803
8273-84_3	IL31R	2.46691	0.0296994	0.159701	0.0743821	0.207605	213.625
6955-68_3	SNX1	0.13576	0.00754783	0.159742	0.0742548	0.207605	213.26
3359-11_2	CDK8/cyclin C	-0.0377442	-0.0167406	0.159742	0.0742548	0.207605	213.26
4152-58_2	Prekallikrein	-0.0248676	-0.0550173	0.159701	0.0743821	0.207605	213.625
9357-4_3	CREG1	-0.0727809	-0.0796769	0.159659	0.0745095	0.207759	213.991
8323-163_3	TFF3	0.713146	0.0554162	0.159576	0.074765	0.208067	214.725
9183-7_3	IFN-a/b R1	-0.741464	-0.05691	0.159576	0.074765	0.208067	214.725
10367-62_3	IL-12	0.608309	0.120946	0.159535	0.074893	0.208084	215.093
7882-31_3	SLAF7	0.105725	0.0966265	0.159493	0.0750212	0.208084	215.461
5489-18_3	Stress-induced-phosphoprotein 1	0.031153	0.0931698	0.159493	0.0750212	0.208084	215.461
3758-68_3	Activated Protein C	0.0401023	0.0652371	0.159452	0.0751496	0.208084	215.83
4556-10_2	IL-34	-0.133789	-0.0471018	0.15941	0.0752782	0.208084	216.199
7955-195_3	ITI heavy chain H1	-0.0685904	-0.0566262	0.15941	0.0752782	0.208084	216.199
5688-65_3	CBLN4	-0.218969	-0.13293	0.159452	0.0751496	0.208084	215.83
9279-7_3	IGS11	0.0813585	0.0546053	0.159369	0.0754069	0.208239	216.569
4930-21_1	Stanniocalcin-1	0.149028	0.0851476	0.159327	0.0755359	0.208395	216.939
10358-33_3	Mcl-1	-0.257392	-0.0426432	0.159202	0.0759238	0.209064	218.053
5598-3_3	GREM2	-0.0538704	-0.0824433	0.159202	0.0759238	0.209064	218.053
10006-25_3	ELK1	-0.0638159	-0.0347764	0.159078	0.0763135	0.209935	219.172
9235-3_3	PXDC1	0.0864723	0.0939234	0.158995	0.0765742	0.210049	219.921
6247-9_3	SIRB1	0.131237	0.072475	0.158995	0.0765742	0.210049	219.921
4428-1_2	CHST2	-0.0921132	0.0643602	0.159036	0.0764437	0.210049	219.546
3416-2_2	BTK	0.122928	0.0634918	0.158828	0.0770979	0.211082	221.425
5667-3_3	SEM3B	-0.0495786	0.0435897	0.158828	0.0770979	0.211082	221.425
2993-1_2	IL-18 Rb	-0.0900856	-0.0319867	0.158745	0.0773608	0.2116	222.18
7738-299_3	STX2	-0.104448	0.0145666	0.158704	0.0774926	0.211759	222.559
8287-17_3	CLM2	-1.73912	0.053943	0.158662	0.0776246	0.211918	222.938
5765-53_3	DB121	0.369395	-0.00486883	0.158164	0.0792229	0.216076	227.528
8474-6_3	ROR1	-0.07172	-0.0206666	0.158122	0.0793574	0.216238	227.914
5117-14_3	ROBO3	0.124974	0.0510883	0.158081	0.079492	0.216356	228.301
7871-16_3	T132A	-0.0685383	-0.0734171	0.158039	0.0796268	0.216356	228.688
5728-60_3	FCRL1	-0.0706408	-0.102531	0.158039	0.0796268	0.216356	228.688
3657-74_3	Calcineurin B a	0.0860033	0.0695103	0.157998	0.0797619	0.216518	229.076
9315-16_3	MUL1	0.405238	0.246539	0.157956	0.0798971	0.21668	229.464
10534-40_3	PARP	0.0235279	0.0808381	0.157748	0.080576	0.21668	231.414
9363-11_3	CX048	0.128768	0.069536	0.157748	0.080576	0.21668	231.414
3232-28_2	TrATPase	0.0428443	0.0597788	0.15779	0.0804399	0.21668	231.023
5250-53_3	IMDH2	0.185679	0.0442506	0.157831	0.0803039	0.21668	230.633
7225-51_3	MMGT1	0.351967	0.0352979	0.15779	0.0804399	0.21668	231.023
2695-25_1	PECAM-1	-0.00498301	0.0351699	0.15779	0.0804399	0.21668	231.023
9995-6_3	DUT	0.0433396	0.0255226	0.15779	0.0804399	0.21668	231.023
8260-13_3	PDZ1I	-0.0494684	-0.0391037	0.157831	0.0803039	0.21668	230.633
8064-125_3	Poliovirus receptor	-0.820448	-0.0739048	0.157873	0.0801681	0.21668	230.243
6064-4_3	TXNDC4	0.0702789	0.127254	0.157665	0.080849	0.217008	232.198
8219-14_3	ZG16	-0.295347	-0.689222	0.157665	0.080849	0.217008	232.198
6551-94_3	Vaspin	0.121242	0.112771	0.157624	0.0809858	0.217172	232.591
6395-58_3	GPHA2	0.166538	-0.0373666	0.157582	0.0811227	0.217336	232.984
5897-58_3	Gastrin-releasing peptide	0.0600291	0.0750674	0.157541	0.0812599	0.217501	233.378
8327-26_3	DPEP2	0.074454	0.070677	0.157416	0.0816725	0.218402	234.564
8948-13_3	ADA19	1.10208	0.128724	0.15725	0.0822255	0.218421	236.152
8071-114_3	PCDB7	0.153316	0.0586024	0.15725	0.0822255	0.218421	236.152
3651-50_5	VEGF sR2	0.0440095	0.0529076	0.157208	0.0823642	0.218421	236.55
8854-59_3	RIR2B	-0.0464857	0.0337159	0.157291	0.082087	0.218421	235.754
10342-55_3	PIAS4	-0.0405181	0.0333934	0.157208	0.0823642	0.218421	236.55
4970-55_1	carbonic anhydrase II	0.189591	0.0313992	0.157333	0.0819486	0.218421	235.356
7173-141_3	T132C	-0.0475023	-0.00121391	0.157291	0.082087	0.218421	235.754
2785-15_2	MCP-2	-0.0637058	-0.00823003	0.157208	0.0823642	0.218421	236.55
4889-82_1	WNT7A	-0.0646928	-0.0412206	0.157291	0.082087	0.218421	235.754
8275-31_3	PEAR1	-0.0163137	-0.0120548	0.157084	0.0827816	0.21872	237.749
7099-33_3	FSTL5	-0.526585	-0.016766	0.157125	0.0826423	0.21872	237.349
2618-10_2	ERBB4	-0.0712677	-0.0223155	0.157084	0.0827816	0.21872	237.749
9226-6_3	TMUB2	-0.326529	-0.0309607	0.157125	0.0826423	0.21872	237.349
5082-51_3	IL-1 sR9	-0.00362126	0.0200345	0.157042	0.0829211	0.218887	238.149
7752-31_3	CLC4D	0.2234	0.0555477	0.156543	0.0846108	0.223143	243.002
7905-30_3	HPT	0.134728	0.0575814	0.156336	0.0853234	0.224815	245.049
7227-75_3	COCH	0.0161775	0.0946897	0.156128	0.086041	0.225259	247.11
2999-6_2	LSAMP	0.0176859	0.0280314	0.156128	0.086041	0.225259	247.11
9484-75_3	Desmoglein-2	0.0477631	0.0203575	0.156253	0.0856098	0.225259	245.871
2744-57_2	IgG	-0.0538165	-0.0225602	0.156128	0.086041	0.225259	247.11
9294-45_3	MFAP2	-0.0228845	-0.0294145	0.156211	0.0857533	0.225259	246.284
8952-65_3	G-CSF	-0.0803704	-0.03379	0.156211	0.0857533	0.225259	246.284
5357-60_3	NLGNX	0.117758	-0.0863957	0.15617	0.085897	0.225259	246.696
9929-16_3	DHB7	0.219795	0.175965	0.156003	0.0864739	0.226187	248.353
5634-39_3	OFUT1	-0.0935369	-0.0980781	0.155962	0.0866187	0.226359	248.769
6984-6_3	IGSF8	0.0775078	0.0440777	0.15592	0.0867636	0.226532	249.185
7925-18_3	CL070	0.268432	0.0936125	0.155837	0.0870541	0.227084	250.019
8843-34_3	MRF	-0.748191	0.0534	0.155796	0.0871997	0.227257	250.437
4920-10_1	Lysozyme	0.0492808	0.0688178	0.155754	0.0873454	0.227431	250.856
5639-49_3	NETO1	-0.00607755	0.0504536	0.155713	0.0874914	0.227604	251.275
9482-110_3	NUDT9	0.0621514	0.0860455	0.155671	0.0876375	0.227778	251.695
6210-100_3	IFNA5	-0.00102679	0.049101	0.155629	0.0877839	0.227921	252.115
8785-1_3	ARMC5	-0.487765	0.0202596	0.155588	0.0879305	0.227921	252.536
4224-7_2	HNRPQ	-0.0263159	-0.0530868	0.155588	0.0879305	0.227921	252.536
5666-64_3	IL-1 sRII	0.282285	-0.0278925	0.155546	0.0880772	0.228095	252.958
6553-68_3	CCD19	0.442006	0.0734964	0.155463	0.0883714	0.228415	253.803
6917-49_3	LRRC3	-0.0541482	0.0375139	0.155422	0.0885188	0.228415	254.226
3427-63_2	CSK21	-0.0856668	0.014365	0.155463	0.0883714	0.228415	253.803
7742-11_3	RN148	-0.447844	-0.0496656	0.155422	0.0885188	0.228415	254.226
3440-7_2	granzyme A	0.0488346	0.103559	0.155297	0.0889622	0.229324	255.5
7878-2_3	SC61B	1.4858	0.0575133	0.155256	0.0891104	0.229324	255.925
6617-12_3	FCRL6	-0.0599014	-0.0025599	0.155256	0.0891104	0.229324	255.925
8487-62_3	IgA	0.243755	0.0671873	0.154757	0.0909053	0.233703	261.08
6543-182_3	PRRP	0.529604	0.0667652	0.154715	0.0910562	0.233703	261.513
9264-11_3	CATO	-0.39382	-0.00795645	0.154715	0.0910562	0.233703	261.513
10761-5_3	TMED2	-0.717172	0.0509748	0.154466	0.0919662	0.235407	264.127
4254-6_2	NUDC3	-0.0374329	0.0211344	0.154466	0.0919662	0.235407	264.127
9865-40_3	UBE2B	-0.252551	-0.0839966	0.154508	0.091814	0.235407	263.69
3182-38_2	CD39	-0.0747005	-0.0402087	0.1543	0.0925771	0.23676	265.881
10086-39_3	CBS	0.286438	0.0798206	0.154258	0.0927303	0.236941	266.322
7825-7_3	ABD12	0.0816538	0.0505589	0.154134	0.0931913	0.237907	267.646
2838-53_1	MMP-17	0.0379237	0.103478	0.154009	0.0936543	0.238877	268.975
7838-27_3	SMR3A	-0.0267884	0.0408636	0.153968	0.093809	0.239059	269.419
7116-31_3	OSCAR	-0.149698	0.0391461	0.153926	0.093964	0.239212	269.864
7993-23_3	ASTL	0.637673	0.0376232	0.153885	0.0941191	0.239212	270.31
3361-26_2	CLC4K	0.0492402	0.0238192	0.153885	0.0941191	0.239212	270.31
5000-52_1	LG3BP	0.112984	0.0358064	0.153843	0.0942745	0.239396	270.756
3827-22_1	PAK6	-0.27884	0.0353266	0.153677	0.0948981	0.240766	272.547
8898-19_3	PP14B	-0.492062	-0.0207525	0.153594	0.0952113	0.241348	273.447
2590-69_4	ROR1	-0.113913	-0.0319874	0.152971	0.0975872	0.247152	280.271
6603-18_3	KALM	0.0731631	0.0184553	0.152929	0.0977474	0.24734	280.73
4967-1_1	C1QBP	-0.0589234	-0.0519368	0.152887	0.0979077	0.247527	281.191
5104-57_3	NKp46	-0.10823	0.0102784	0.152846	0.0980683	0.247715	281.652
5248-68_2	Cyclophilin F	0.227651	0.214582	0.152804	0.0982291	0.247903	282.114
5078-82_3	EphB6	0.0199406	0.0615632	0.152763	0.0983901	0.248092	282.576
10933-107_3	CABP8	0.363151	0.014766	0.152721	0.0985513	0.24828	283.039
10058-1_3	RD23A	0.137498	0.0542771	0.152597	0.0990364	0.249283	284.432
5626-20_3	CTRC	-0.0690816	0.0605475	0.152555	0.0991985	0.249473	284.898
9287-6_3	SPRE	-0.249192	-0.0629633	0.152514	0.0993608	0.249663	285.364
7019-13_3	Semaphorin-7A	0.0398262	-0.0846666	0.152472	0.0995234	0.249852	285.831
5124-62_3	sICAM-5	-0.0898897	-0.0801207	0.152389	0.0998492	0.250451	286.767
11096-57_3	HEMK2	0.0526367	0.0639313	0.152347	0.100012	0.250642	287.236
8372-29_3	CDHR1	0.042027	0.0240105	0.152306	0.100176	0.250833	287.705
4468-21_2	SPHK2	-0.156762	-0.0331118	0.152264	0.10034	0.251024	288.175
8068-43_3	K1161	-0.791602	0.0389301	0.152181	0.100668	0.251625	289.117
4165-2_1	Thyroglobulin	0.0138754	0.042104	0.152098	0.100996	0.2522	290.062
5798-3_3	BID	-0.0717021	0.0265955	0.152057	0.101161	0.2522	290.535
2948-58_2	Growth hormone receptor	-0.0493322	-0.0272555	0.152057	0.101161	0.2522	290.535
2358-19_2	VEGF sR3	0.102184	0.0248513	0.152015	0.101326	0.252393	291.009
9585-80_3	ACAM	-0.0858321	-0.000789652	0.151973	0.101491	0.252585	291.483
6103-70_3	FCRL5	-0.13911	-0.0349854	0.151849	0.101988	0.253602	292.911
5116-62_2	ROBO2	-0.0494548	-0.0204943	0.151392	0.103828	0.257954	298.195
10753-31_3	ADAM7	1.35466	0.0932237	0.15135	0.103997	0.258149	298.679
7242-14_3	CJ072	0.0853216	0.0113379	0.151226	0.104504	0.259184	300.135
2751-16_2	Azurocidin	0.00654182	0.0572414	0.151059	0.105183	0.259748	302.087
10895-28_3	TM11B	0.201694	0.0486224	0.151101	0.105013	0.259748	301.598
10445-20_3	ApoM	-0.0861212	-0.0525636	0.151101	0.105013	0.259748	301.598
3708-62_1	a2-Macroglobulin	-0.155979	-0.096507	0.151059	0.105183	0.259748	302.087
4430-44_3	Collectin Kidney 1	-0.0193586	-0.142883	0.151101	0.105013	0.259748	301.598
10076-1_3	AP4M1	-0.00718373	0.0663968	0.151018	0.105354	0.259945	302.576
2682-68_1	HSP 60	0.163015	0.132741	0.150893	0.105867	0.260762	304.049
3363-31_4	CSK	0.165282	0.0565631	0.150893	0.105867	0.260762	304.049
7186-111_3	STX3	0.37527	0.1359	0.15081	0.106209	0.260935	305.034
10432-3_3	K1644	-0.365499	0.0640496	0.15081	0.106209	0.260935	305.034
7957-2_3	SCG3	-0.0889022	-0.100762	0.15081	0.106209	0.260935	305.034
5193-51_3	K-ras	-0.0880769	0.0461886	0.150769	0.106381	0.261134	305.527
3594-6_5	CATE	-0.10628	0.0678056	0.150561	0.107244	0.262578	308.004
2681-23_2	HGF	-0.0886979	0.0656507	0.150602	0.107071	0.262578	307.507
6511-17_3	F19A4	0.128393	0.0377461	0.150561	0.107244	0.262578	308.004
11071-1_3	IL-5	0.04556	0.0324041	0.150478	0.10759	0.263202	309
9923-6_3	SOS1	-0.0749277	-0.028585	0.150436	0.107764	0.263403	309.498
5265-12_3	GRB2-related adapter protein 2	0.0288267	0.0407405	0.150395	0.107938	0.263603	309.998
10737-96_3	Serpin B1	0.0369182	0.122384	0.150353	0.108112	0.263804	310.498
5098-79_3	KLRF1	0.0990792	0.0243219	0.150312	0.108286	0.264006	310.998
6391-52_3	LIRA3	0.193465	0.142874	0.150187	0.108811	0.26461	312.505
3394-81_2	PLK-1	-0.0751272	0.0511384	0.150229	0.108636	0.26461	312.002
3356-50_1	Carbonic anhydrase VII	-0.0960273	7.77359e-05	0.150187	0.108811	0.26461	312.505
3867-49_1	SE6L2	-0.0179868	-0.0129005	0.150145	0.108986	0.264812	313.008
8262-20_3	Apo D	0.0599013	0.0146802	0.150104	0.109162	0.265015	313.512
9355-26_3	LAMP3	0.328498	0.107481	0.149647	0.111108	0.26883	319.101
9051-13_3	IL32	0.833486	-0.0106672	0.149688	0.11093	0.26883	318.59
5659-11_3	TRH	0.236002	-0.0185811	0.149647	0.111108	0.26883	319.101
9761-89_3	LDHA	-0.10645	-0.0979521	0.149647	0.111108	0.26883	319.101
3331-8_1	RGMB	-0.0385943	-0.03162	0.149564	0.111465	0.269467	320.126
8766-29_3	LIRA5	-0.00941272	0.0313186	0.149522	0.111643	0.269672	320.64
5099-14_3	LAG-3	0.0701253	0.0731515	0.149439	0.112002	0.269817	321.669
6583-67_3	protein Z inhibitor	0.0326716	0.0671785	0.149356	0.112361	0.269817	322.701
3210-1_2	METAP1	0.118724	0.056059	0.149356	0.112361	0.269817	322.701
8253-2_3	PMGT1	-0.138396	0.0467109	0.149398	0.112181	0.269817	322.185
8792-17_3	PODXL	-0.0358184	0.0137009	0.149398	0.112181	0.269817	322.185
7156-2_3	FUT10	0.1134	0.00771898	0.149481	0.111822	0.269817	321.154
5621-64_3	THSD1	0.0271766	-0.0421519	0.149398	0.112181	0.269817	322.185
2611-72_2	Dtk	-0.00469199	-0.0312997	0.149273	0.112721	0.270456	323.735
8106-15_3	SSRA	0.0998322	0.0644217	0.14919	0.113082	0.271096	324.773
3322-52_2	LRIG3	-0.00607127	-0.0821496	0.149148	0.113263	0.271303	325.292
4542-24_2	Clusterin	-0.0570287	-0.0648383	0.149107	0.113445	0.271511	325.813
3879-50_1	CDC37	0.0558758	0.0995233	0.149065	0.113626	0.271718	326.334
6284-7_3	F150B	0.0891571	0.0786167	0.148982	0.113989	0.272135	327.378
9296-15_3	PTPRD	-0.0758664	-0.0790681	0.148982	0.113989	0.272135	327.378
4449-67_3	GREM1	0.00700043	0.0741523	0.148857	0.114537	0.272987	328.949
6079-59_3	ACPL2	0.0459321	0.0521509	0.148857	0.114537	0.272987	328.949
9497-3_3	CV032	-0.268048	0.0807087	0.148608	0.115637	0.273342	332.11
10700-10_3	IGS11	1.54981	0.0533306	0.148733	0.115086	0.273342	330.527
6620-82_3	LIGO1	0.0687666	0.0495059	0.148608	0.115637	0.273342	332.11
8765-23_3	EFNB2	-0.0121458	0.0451176	0.148733	0.115086	0.273342	330.527
5810-25_3	Cripto	0.186539	0.0394374	0.148608	0.115637	0.273342	332.11
9838-4_3	SMAD1	0.0199668	0.0392292	0.148774	0.114903	0.273342	330
2599-51_2	4-1BB ligand	-0.099182	-0.0115742	0.148774	0.114903	0.273342	330
5089-11_3	IL-7 Ra	-0.305195	-0.0304548	0.14865	0.115453	0.273342	331.582
4880-21_1	GDF2	-0.157797	-0.0319512	0.14865	0.115453	0.273342	331.582
11081-1_3	GPDA	-0.293039	-0.1797	0.148691	0.115269	0.273342	331.054
8634-187_3	ADA19	0.156753	0.0562938	0.148567	0.115822	0.273552	332.64
6507-16_3	NCAM2	-0.087777	-0.0318228	0.148525	0.116006	0.273763	333.17
4540-11_2	CBX5	-0.0623196	-0.0168782	0.148484	0.116191	0.273974	333.7
5854-60_3	tau	0.173276	0.0241107	0.148359	0.116747	0.275059	335.297
2706-69_2	Thyroxine-Binding Globulin	0.0214153	0.0183936	0.147902	0.118803	0.279675	341.204
6609-22_3	CN37	0.050908	0.0544731	0.147777	0.119369	0.280548	342.829
9918-23_3	Calbindin D28	0.0452889	0.0237546	0.147777	0.119369	0.280548	342.829
3445-53_2	IL-15 Ra	0.00847157	0.0560701	0.147736	0.119559	0.280762	343.372
5708-1_3	LEAP2	0.171467	0.201355	0.147611	0.120128	0.28095	345.007
10608-9_3	HIS1	-0.405347	0.0706284	0.147653	0.119938	0.28095	344.461
3844-2_1	Cyclophilin A	0.0564141	0.0268465	0.147653	0.119938	0.28095	344.461
9359-9_3	EGFL9	0.0171247	0.00263721	0.147611	0.120128	0.28095	345.007
7100-31_3	CD2	-0.397289	-0.410939	0.147611	0.120128	0.28095	345.007
10692-48_3	CR026	0.163741	0.165401	0.147528	0.120508	0.281611	346.1
4481-34_2	C4	0.0521092	0.0744536	0.147445	0.12089	0.282273	347.195
2795-23_3	Alkaline phosphatase, bone	0.0101594	0.100084	0.14732	0.121464	0.282923	348.844
9221-6_3	IPIL1	0.147218	0.0809875	0.14732	0.121464	0.282923	348.844
3340-53_1	TSP4	-0.135387	-0.109637	0.14732	0.121464	0.282923	348.844
8768-4_3	Bcl-10	-0.0254882	0.0397486	0.147196	0.12204	0.284036	350.5
4774-62_3	FAM107B	-0.187345	0.0342786	0.147113	0.122426	0.284702	351.607
8465-52_3	Cathepsin H	0.108434	0.0886026	0.147071	0.122619	0.284921	352.162
6611-8_3	KDEL1	0.042053	0.0517598	0.146946	0.1232	0.285117	353.83
6600-70_3	RELL2	-0.892426	0.0479272	0.146946	0.1232	0.285117	353.83
5716-49_3	CSAG1	-0.211885	0.022405	0.146946	0.1232	0.285117	353.83
9065-28_3	TXLNA	0.550792	0.00801413	0.146946	0.1232	0.285117	353.83
7926-13_3	SPIT3	-0.569338	0.00516684	0.146946	0.1232	0.285117	353.83
8045-3_3	KI3L3	0.0150509	0.0651459	0.146905	0.123394	0.285336	354.388
9384-17_3	Cathelicidin peptide	0.0963233	0.137449	0.146739	0.124173	0.285528	356.625
3174-2_1	ATS1	-0.0603728	0.0501166	0.146822	0.123783	0.285528	355.505
6214-84_3	IFNA8	-0.154455	0.0494244	0.14678	0.123978	0.285528	356.065
8089-173_3	NR4A1	-0.254854	0.0264177	0.146739	0.124173	0.285528	356.625
4132-27_2	FST	0.0714702	0.0139013	0.146739	0.124173	0.285528	356.625
11094-104_3	LPPL	-0.162588	-0.0392473	0.146822	0.123783	0.285528	355.505
4964-67_1	ARTS1	-0.0607261	-0.10575	0.146822	0.123783	0.285528	355.505
5719-66_3	CI061	0.467443	0.0400081	0.146032	0.127529	0.292776	366.263
8229-1_3	GXLT1	0.00397819	-0.000184807	0.146032	0.127529	0.292776	366.263
8316-36_3	RANK	-0.0127168	0.138897	0.1457	0.129134	0.292926	370.872
7096-30_3	RMD1	0.0242528	0.127658	0.145658	0.129335	0.292926	371.451
5226-36_3	CK2-A2:B	0.197431	0.120014	0.145451	0.130348	0.292926	374.359
10615-18_3	MYP0	0.0782983	0.0906401	0.1457	0.129134	0.292926	370.872
6398-12_3	LONM	0.0954588	0.0872957	0.145575	0.12974	0.292926	372.612
5508-62_3	Cathepsin D	0.169947	0.0803018	0.145575	0.12974	0.292926	372.612
8328-9_3	EKI1	-0.223178	0.0736724	0.145742	0.128932	0.292926	370.293
6464-40_3	PVRIG	0.0505778	0.0651065	0.145617	0.129537	0.292926	372.031
7797-11_3	CC167	0.0167103	0.0518306	0.1457	0.129134	0.292926	370.872
5352-11_3	HVEM	0.127106	0.0413319	0.145908	0.128129	0.292926	367.986
5615-62_3	F172A	-0.136075	0.0411562	0.145451	0.130348	0.292926	374.359
4904-7_1	Caspase-2	1.88222	0.0400026	0.145534	0.129942	0.292926	373.194
5410-53_3	CAD15	0.0801352	0.0377606	0.145866	0.128329	0.292926	368.561
8008-28_3	HRK	0.0289769	0.0345636	0.145825	0.12853	0.292926	369.138
6360-7_3	DB128	0.132752	0.0311979	0.145783	0.128731	0.292926	369.715
4890-10_1	ACTH	0.0678134	0.0277927	0.145991	0.127729	0.292926	366.837
3798-71_1	Carbonic anhydrase 9	0.170743	0.0173361	0.145825	0.12853	0.292926	369.138
9836-20_3	DCK	0.116858	0.0110822	0.145866	0.128329	0.292926	368.561
10658-28_3	SC11C	0.206536	-0.0327071	0.145949	0.127929	0.292926	367.411
10772-21_3	CGAT2	-0.02616	-0.0572461	0.145617	0.129537	0.292926	372.031
6525-17_3	DUSP13	0.0615275	-0.0591993	0.145451	0.130348	0.292926	374.359
9229-9_3	CTRL	0.443939	-0.0613306	0.145451	0.130348	0.292926	374.359
8236-8_3	CR032	0.105768	-0.0687813	0.145575	0.12974	0.292926	372.612
8298-8_3	CG045	0.226585	-0.0762959	0.145492	0.130145	0.292926	373.776
7638-30_3	Lectin, mannose-binding 2	-0.0624352	-0.0780385	0.145908	0.128129	0.292926	367.986
2943-5_2	Cytochrome P450 3A4	-0.0399088	-0.0828168	0.145534	0.129942	0.292926	373.194
3727-35_1	PYY	-0.0749202	-0.104562	0.145742	0.128932	0.292926	370.293
4420-7_2	ADAM12	0.219164	0.118258	0.145409	0.130551	0.293153	374.943
7137-8_3	MSRA	-0.078812	0.0500502	0.145326	0.130958	0.29338	376.113
8258-22_3	UXS1	-0.0880828	-0.00963168	0.145368	0.130755	0.29338	375.527
7097-8_3	CDY1	-0.354013	-0.0341024	0.145326	0.130958	0.29338	376.113
9773-15_3	RN149	0.0668639	0.0337331	0.145285	0.131162	0.293608	376.699
8960-3_3	LRAP	0.111279	0.0952089	0.14516	0.131776	0.293608	378.461
6907-17_3	TMC5A	-0.208384	0.059609	0.14516	0.131776	0.293608	378.461
6463-59_3	OX26	-0.242025	0.0408509	0.145201	0.131571	0.293608	377.873
6625-31_3	ATAD1	-0.468793	0.00117272	0.145201	0.131571	0.293608	377.873
2891-1_3	CD22	-0.0698608	-0.00940917	0.14516	0.131776	0.293608	378.461
7108-7_3	CS077	-0.0491346	-0.0185546	0.145243	0.131367	0.293608	377.285
5627-53_3	GON1	0.0549397	0.00904335	0.145118	0.131981	0.293837	379.05
9253-52_3	BGAT	-0.163315	0.126969	0.144952	0.132804	0.295212	381.414
7815-49_3	IBPL1	-0.079978	-0.0117787	0.144952	0.132804	0.295212	381.414
6451-64_3	ASPN	-0.095367	-0.0362174	0.144495	0.135089	0.300058	387.975
5465-32_3	H6ST1	0.0622	0.0324075	0.144454	0.135298	0.300059	388.576
3235-50_2	WFKN2	-0.0322895	-0.0571609	0.144454	0.135298	0.300059	388.576
9333-59_3	ERP27	0.351027	0.0523614	0.144412	0.135508	0.30006	389.178
7981-230_3	B3GT6	0.063547	0.0312322	0.144412	0.135508	0.30006	389.178
8264-43_3	DLL1	0.0245745	0.0460954	0.144371	0.135717	0.300062	389.78
9383-24_3	CH3L2	-0.286744	0.00551311	0.144371	0.135717	0.300062	389.78
4192-10_2	AK1A1	0.0869482	0.052905	0.144329	0.135927	0.300295	390.384
5682-13_3	VASN	-0.0417069	-0.0251718	0.144287	0.136138	0.300298	390.988
2762-30_2	FGF-19	-0.235237	-0.117265	0.144287	0.136138	0.300298	390.988
3365-7_2	Dkk-4	0.111579	0.113546	0.144246	0.136348	0.300301	391.592
4491-4_2	IL-5 Ra	0.0247434	-0.085573	0.144246	0.136348	0.300301	391.592
5488-74_3	SRCN1	0.149007	0.0685709	0.144204	0.136559	0.300535	392.198
8842-16_3	GRM1C	-0.163649	0.00306213	0.144121	0.136982	0.301234	393.411
7880-9_3	PSA1	0.270706	0.0625474	0.144038	0.137405	0.301703	394.628
7115-5_3	Semenogelin	0.0713315	0.0292599	0.144038	0.137405	0.301703	394.628
3814-63_1	IL-11 RA	-0.11268	-0.116387	0.143872	0.138255	0.303338	397.07
3280-49_2	Aggrecan	-0.100939	-0.100254	0.14383	0.138469	0.303574	397.682
9366-54_3	IL-21 sR	-0.0920437	-0.0956157	0.143789	0.138682	0.30381	398.295
4900-8_1	C3a	0.147029	0.176556	0.143747	0.138896	0.303815	398.909
7167-102_3	VAPA	0.0749124	0.103956	0.143747	0.138896	0.303815	398.909
9246-1_3	lipoprotein, Lp(a)-like 2	0.0521422	0.0935073	0.143581	0.139754	0.304538	401.373
9512-24_3	SPY1	0.241902	0.0394678	0.14354	0.139969	0.304538	401.99
4981-6_1	DSC3	1.72604	0.0218663	0.14354	0.139969	0.304538	401.99
3314-74_2	GFRa-1	-0.108895	-0.00285414	0.14354	0.139969	0.304538	401.99
9046-46_3	LPPRC	-0.120592	-0.0451747	0.143623	0.139539	0.304538	400.756
9960-2_3	TBCD5	-0.46256	-0.0563297	0.143581	0.139754	0.304538	401.373
4996-66_1	HRG	-0.0524808	-0.0819244	0.143623	0.139539	0.304538	400.756
4131-72_2	Fibronectin	0.0935299	0.0514509	0.143457	0.1404	0.304553	403.228
9353-8_3	LIPG	-0.473805	-0.00929616	0.143457	0.1404	0.304553	403.228
6274-15_3	WSCD2	-0.0751195	-0.0225718	0.143457	0.1404	0.304553	403.228
6915-2_3	C16L2	-0.2607	-0.0687932	0.143457	0.1404	0.304553	403.228
5593-11_3	PDIA5	-0.00514527	0.0520246	0.143415	0.140616	0.304561	403.848
9189-76_3	ghrelin	-0.0448363	-0.00102598	0.143415	0.140616	0.304561	403.848
5822-22_3	GDNF	-1.50317	0.0128751	0.143373	0.140832	0.30457	404.469
5201-50_4	PDE9A	0.436156	0.00587466	0.143373	0.140832	0.30457	404.469
9118-7_3	PSD2	-0.134969	-0.138379	0.143249	0.141482	0.305746	406.336
9259-35_3	DR6	0.0272991	-0.0121279	0.142792	0.143887	0.310708	413.242
10513-13_3	CSEN	0.558808	0.0293893	0.14275	0.144107	0.310717	413.875
8033-1_3	DJC18	0.378937	-0.0321545	0.14275	0.144107	0.310717	413.875
6086-15_3	CRDL2	-0.0204072	-0.0934386	0.142709	0.144327	0.310959	414.508
5475-10_3	PKC-B-II	0.169594	0.129684	0.142626	0.144769	0.311443	415.777
9328-55_3	MICB	0.260279	0.0984777	0.142626	0.144769	0.311443	415.777
2644-11_2	PKC-A	0.259883	0.163142	0.142584	0.14499	0.311463	416.412
9947-22_3	TOPB1	0.173769	-0.0323597	0.142543	0.145212	0.311463	417.049
8697-38_3	Glypican 1	-0.0258362	-0.0409035	0.142543	0.145212	0.311463	417.049
9335-28_3	PSG9	0.00631289	-0.0839458	0.142543	0.145212	0.311463	417.049
7776-20_3	UNC5B	0.0260675	0.0628945	0.142418	0.145878	0.312193	418.962
9329-28_3	TRML1	-0.0266145	0.0624869	0.142418	0.145878	0.312193	418.962
2764-20_2	FGF9	0.0260859	0.0285398	0.142418	0.145878	0.312193	418.962
8066-38_3	SYT9	-0.0175638	0.0578978	0.142252	0.146771	0.313402	421.525
4811-33_3	ITI heavy chain H4	0.0699931	0.0420568	0.142252	0.146771	0.313402	421.525
7194-36_3	NPTN	-0.412051	-0.0995883	0.142252	0.146771	0.313402	421.525
3681-87_3	kallikrein 14	0.0579867	0.0961588	0.14221	0.146994	0.313413	422.168
7117-21_3	SPI2	0.386339	0.0442006	0.14221	0.146994	0.313413	422.168
9227-15_3	PD-1	0.27454	0.123824	0.142169	0.147218	0.313658	422.811
2746-56_1	TSLP R	0.0136918	0.0528135	0.142086	0.147667	0.314149	424.101
9201-13_3	Transgelin-2	-0.0293904	0.0514099	0.142086	0.147667	0.314149	424.101
5247-17_4	Cyclophilin A	0.0722835	0.0496234	0.142044	0.147892	0.314394	424.746
4971-1_1	CATZ	-0.0453053	-0.0728453	0.142002	0.148117	0.31464	425.393
10949-59_3	RLA2	0.145115	0.0646492	0.141961	0.148343	0.314653	426.04
9368-64_3	LRTM1	-0.324343	0.0564632	0.141961	0.148343	0.314653	426.04
4140-3_2	IL-7	-0.0897088	0.0388139	0.141919	0.148568	0.314899	426.689
2988-57_2	ICOS	0.0556564	0.121745	0.141878	0.148794	0.315146	427.338
9565-6_3	PAWR	-0.0434732	0.0313745	0.141836	0.149021	0.315392	427.987
7963-36_3	TTMP	1.18314	0.0200609	0.14167	0.149928	0.31708	430.594
5014-49_1	NCK1	-0.0798947	0.0698468	0.141545	0.150612	0.317373	432.558
7847-66_3	TKNK	0.230055	0.0228923	0.141504	0.150841	0.317373	433.214
5751-14_3	HCCR-1	0.0872983	0.00630305	0.141504	0.150841	0.317373	433.214
5752-63_3	SUSD3	0.129283	0.00235927	0.141545	0.150612	0.317373	432.558
5870-23_2	BAD	-0.283349	-0.00341886	0.141587	0.150384	0.317373	431.903
6365-62_3	KCT2	-0.0550805	-0.00611364	0.141545	0.150612	0.317373	432.558
8556-5_3	F134B	0.0771726	-0.0232999	0.141504	0.150841	0.317373	433.214
5077-28_3	EPHB2	-0.0693527	-0.0459168	0.141005	0.153604	0.322951	441.15
4276-10_2	prostatic binding protein	0.0484794	-0.009641	0.140964	0.153836	0.322966	441.817
3044-3_2	PARC	0.0381595	-0.0126574	0.140964	0.153836	0.322966	441.817
2515-14_3	GFRa-2	-0.0412595	-0.0090668	0.140922	0.154068	0.323217	442.484
7736-28_3	OPALI	-0.0301761	0.00036741	0.140881	0.154301	0.323233	443.153
3298-52_2	Contactin-4	-0.0472161	-0.0115006	0.140881	0.154301	0.323233	443.153
7927-16_3	SIA7E	0.522268	-0.0138417	0.140839	0.154534	0.323249	443.822
8908-14_3	KCE1L	-0.671578	-0.0302329	0.140839	0.154534	0.323249	443.822
10451-11_3	NUCB1	-0.0325409	-0.0397182	0.140798	0.154767	0.323502	444.491
2839-2_1	OX40 Ligand	-0.0685398	0.0342353	0.140715	0.155234	0.323771	445.833
3296-92_2	CNTN2	-0.06221	-0.0236445	0.140715	0.155234	0.323771	445.833
10928-7_3	IL-1F6	-0.149345	-0.0418118	0.140715	0.155234	0.323771	445.833
7840-64_3	LGMN	0.0194851	0.0769403	0.140673	0.155469	0.324024	446.506
6411-58_3	DB135	-0.048926	0.0246307	0.140631	0.155703	0.324277	447.179
4918-21_1	Kininogen, HMW	-0.0419688	-0.0270253	0.14059	0.155937	0.324531	447.852
9169-14_3	SUMO3	-0.0633958	0.0806993	0.140548	0.156172	0.324549	448.527
5707-55_3	ELK3	0.340835	0.0726171	0.140548	0.156172	0.324549	448.527
7748-11_3	NDUV2	0.249443	0.0671826	0.140507	0.156408	0.324803	449.203
6152-111_3	p53	0.0541863	0.0607522	0.140424	0.156879	0.325546	450.556
5934-1_3	Ferritin	0.188412	0.28228	0.140382	0.157115	0.325566	451.234
9466-43_3	G6B	0.000930054	0.0697464	0.140382	0.157115	0.325566	451.234
7093-20_3	NRX3B	-0.0820809	-0.0351579	0.140341	0.157351	0.325585	451.913
6975-52_3	SNAPN	-0.0575469	-0.0423123	0.140341	0.157351	0.325585	451.913
6576-1_3	ART4	0.0976819	0.0718823	0.140299	0.157588	0.325606	452.592
8990-42_3	AT1B3	-0.0390262	-0.0639227	0.140299	0.157588	0.325606	452.592
3081-70_2	ULBP-1	0.0345663	0.0537975	0.140258	0.157825	0.325627	453.272
9127-4_3	S26A5	-0.233605	-0.0319937	0.140258	0.157825	0.325627	453.272
10087-10_3	Alpha crystallin A chain	-0.0109998	0.0654308	0.140216	0.158062	0.325648	453.954
5392-73_2	Fas, soluble	-0.0637659	-0.11192	0.140216	0.158062	0.325648	453.954
2953-31_2	Luteinizing hormone	0.175919	0.0894364	0.140174	0.158299	0.325904	454.636
5643-2_3	LCN8	-0.113196	-0.0633538	0.140091	0.158775	0.326649	456.002
2770-51_2	I-309	-0.0535923	-0.0352952	0.14005	0.159013	0.326905	456.686
10516-53_3	ITM2A	-0.0272174	0.064236	0.139925	0.15973	0.327023	458.745
6399-52_3	D107A	-0.0047434	0.0345768	0.139842	0.160209	0.327023	460.121
4123-60_2	FGF-4	-0.0199916	0.0296762	0.139967	0.159491	0.327023	458.058
3221-54_1	SARP-2	-0.09097	0.0270254	0.139925	0.15973	0.327023	458.745
2858-29_2	Hat1	-0.0320622	0.0171077	0.139842	0.160209	0.327023	460.121
6371-50_3	ANGL7	-0.00420184	0.0138971	0.139884	0.15997	0.327023	459.432
5224-20_3	CSK21	0.0519108	0.00163757	0.139884	0.15997	0.327023	459.432
2449-1_4	GV	-0.0671312	-0.00848258	0.139967	0.159491	0.327023	458.058
8021-59_3	RM14	-0.333055	-0.0895047	0.139842	0.160209	0.327023	460.121
9851-9_3	FABPA	-0.150123	-0.140566	0.139967	0.159491	0.327023	458.058
8014-359_3	MANEA	-0.0432129	0.0481784	0.139801	0.160449	0.32728	460.81
8545-14_3	CQ078	0.0230483	0.0224124	0.139676	0.161171	0.328519	462.883
6485-59_3	IGLL1	0.245375	0.106768	0.139344	0.163109	0.332232	468.448
5122-92_2	Semaphorin-6A	-0.0463008	-0.036991	0.139177	0.164084	0.333746	471.25
7969-163_3	WFD11	-0.0169468	-0.0443526	0.139177	0.164084	0.333746	471.25
2994-71_2	IL-1Rrp2	-0.0209071	-0.0307292	0.139136	0.164329	0.333771	471.952
3736-60_3	BMP-6	0.129483	-0.0499629	0.139136	0.164329	0.333771	471.952
9389-12_3	GLPA	0.0591863	0.0445765	0.139011	0.165065	0.333849	474.065
8924-55_3	CALY	-0.0317705	0.0259174	0.139053	0.164819	0.333849	473.36
3612-6_4	EphB4	0.0950244	0.0227181	0.139053	0.164819	0.333849	473.36
3381-24_2	LYNB	0.0907912	0.0200192	0.139011	0.165065	0.333849	474.065
8004-15_3	G3PT	0.57032	0.0130745	0.139011	0.165065	0.333849	474.065
5339-49_3	calgranulin B	0.0472611	0.00730766	0.139053	0.164819	0.333849	473.36
10070-22_3	PLCG2	-0.0562496	0.0495108	0.13897	0.16531	0.333876	474.771
8044-90_3	XG	0.0561879	0.014858	0.13897	0.16531	0.333876	474.771
3327-27_1	NET4	0.107442	0.0419763	0.138928	0.165556	0.333903	475.478
3045-72_2	PTN	-0.0929754	-0.0780222	0.138928	0.165556	0.333903	475.478
6900-30_3	UB2J1	0.183903	0.0738794	0.138887	0.165803	0.334165	476.186
6467-65_3	KTEL1	0.0192115	0.0846888	0.138762	0.166544	0.335423	478.313
4423-77_2	BCL2-like 1 protein	-0.054122	-0.0454209	0.13872	0.166791	0.335686	479.024
9257-14_3	TACO1	-0.239335	0.0791402	0.138637	0.167287	0.336213	480.449
4912-17_1	GOT1	0.00740231	0.0526085	0.138637	0.167287	0.336213	480.449
10910-6_3	CEAM4	-0.0604898	-0.058171	0.138596	0.167536	0.336477	481.162
10009-2_3	IRF1	-0.0401108	0.0128622	0.138513	0.168033	0.337005	482.592
4534-10_2	BSSP4	0.0307451	-0.0711999	0.138513	0.168033	0.337005	482.592
5646-20_3	RNAS6	0.0472115	0.102227	0.138471	0.168283	0.337035	483.308
8062-15_3	F176B	0.347283	0.0902156	0.138471	0.168283	0.337035	483.308
6260-14_3	F163A	0.063317	0.061959	0.13843	0.168532	0.337299	484.024
3837-6_2	ZAP70	-0.158383	0.081744	0.138388	0.168782	0.337329	484.742
7174-15_3	CD38	0.11182	-0.00558706	0.138388	0.168782	0.337329	484.742
3422-4_2	CDK1/cyclin B	-0.018943	0.0134511	0.138346	0.169032	0.337594	485.461
10890-135_3	LCTL	0.299417	0.062541	0.138305	0.169283	0.33786	486.18
8834-58_3	Calnexin	-0.0836699	0.0379566	0.138263	0.169533	0.33789	486.9
8041-5_3	FNDC5	0.0107346	0.0131691	0.138263	0.169533	0.33789	486.9
9872-23_3	CTNA2	-0.689729	0.00516892	0.13818	0.170036	0.338657	488.343
8794-13_3	DPEP1	-0.105531	0.0125952	0.138139	0.170288	0.338688	489.066
6918-183_3	CCKN	-0.135464	-0.0773586	0.138139	0.170288	0.338688	489.066
5742-14_3	PPA6	-0.0863212	-0.0684851	0.138097	0.170539	0.338955	489.789
10372-18_3	STAT6	-0.0161209	0.0148947	0.138014	0.171044	0.339723	491.239
10621-26_3	PRR16	0.485939	0.00474715	0.13764	0.17333	0.344025	497.805
10622-9_3	FXYD5	0.216105	0.058533	0.137599	0.173586	0.344294	498.538
3040-59_1	MIP-1a	0.431369	0.0401775	0.137474	0.174354	0.345103	500.745
4991-12_1	GPC5	0.422825	0.00600809	0.137474	0.174354	0.345103	500.745
8250-2_3	PTPRJ	-0.0237014	-0.0189763	0.137474	0.174354	0.345103	500.745
6414-8_3	OAF	0.0842349	0.0305675	0.137432	0.174611	0.345136	501.482
3029-52_2	DC-SIGN	0.115811	-0.0763678	0.137432	0.174611	0.345136	501.482
8035-6_3	CA198	-0.123569	0.0851219	0.137391	0.174868	0.345406	502.22
5609-92_3	F19A5	-0.246127	0.0174359	0.137308	0.175383	0.345709	503.699
10613-33_3	CASC4	0.00444231	-0.0342623	0.137308	0.175383	0.345709	503.699
3191-50_2	WFKN1	-0.0181517	-0.0531154	0.137308	0.175383	0.345709	503.699
8002-27_3	Spinesin	-0.0123503	0.0345505	0.137225	0.175899	0.346489	505.181
6406-3_3	NMES1	-0.0277414	-0.0397155	0.137183	0.176157	0.346523	505.923
3234-23_2	URB	-0.0827349	-0.0897841	0.137183	0.176157	0.346523	505.923
6920-1_3	GFRAL	0.197675	-0.0315849	0.137142	0.176416	0.346794	506.666
6351-55_3	CD79B	-0.0604127	0.0349003	0.1371	0.176675	0.346829	507.41
5611-56_3	D108B	-0.103026	-0.0409126	0.1371	0.176675	0.346829	507.41
4546-27_3	EMR2	0.04292	0.0885047	0.136975	0.177454	0.346935	509.647
5644-60_3	RNAS4	0.0475954	0.0747179	0.136975	0.177454	0.346935	509.647
10045-47_3	CUL3	0.0853946	0.0511385	0.137017	0.177194	0.346935	508.901
9196-8_3	Galectin-7	0.118345	-0.0271602	0.136975	0.177454	0.346935	509.647
4697-59_2	GM-CSF	-0.645624	-0.05275	0.136975	0.177454	0.346935	509.647
6904-14_3	LRRT2	-0.0202419	-0.0927325	0.137059	0.176934	0.346935	508.155
2500-2_3	Angiopoietin-4	0.0579251	0.0857705	0.136892	0.177975	0.347717	511.143
7077-9_4	CLC4E	-0.0993058	0.0541601	0.136768	0.178758	0.348773	513.394
8813-160_3	Thioredoxin	0.0421677	0.0429709	0.136768	0.178758	0.348773	513.394
9187-2_3	HMGN1	0.113986	0.0721432	0.136685	0.179282	0.348847	514.898
4500-50_2	SCGF-alpha	0.0180211	0.0499856	0.136726	0.17902	0.348847	514.145
3209-69_1	MEPE	-0.00389838	0.046024	0.136685	0.179282	0.348847	514.898
9819-110_3	PO210	-0.104074	0.0378491	0.136685	0.179282	0.348847	514.898
5476-66_3	PKC-G	-0.126035	0.0648474	0.136602	0.179807	0.349632	516.406
4594-22_2	PACAP-38	0.0999382	0.018466	0.13656	0.18007	0.349906	517.161
9544-24_3	CG069	0.343641	0.0247242	0.136518	0.180333	0.350181	517.917
2831-29_1	Kallikrein 11	-0.0551016	-0.0320514	0.136477	0.180597	0.350456	518.674
4874-3_1	Angiogenin	0.0364925	0.0260408	0.136394	0.181125	0.351006	520.191
7153-66_3	NGRN	0.521134	0.0175703	0.136394	0.181125	0.351006	520.191
3796-79_2	ANGL4	0.0535456	0.0183583	0.136352	0.181389	0.351282	520.95
5100-53_3	LIMP II	-0.0212144	0.0334835	0.136311	0.181654	0.351557	521.711
3195-50_2	Granulysin	0.0621421	0.0513915	0.136269	0.181919	0.351833	522.472
4336-2_1	SAA	0.68214	0.251625	0.135604	0.186202	0.35632	534.773
2580-83_2	Myeloperoxidase	0.0867815	0.0910318	0.135688	0.185663	0.35632	533.223
8839-4_3	Metaxin-2	0.0425863	0.0835086	0.135563	0.186472	0.35632	535.549
10454-99_3	DJC16	0.0454369	0.0720703	0.135688	0.185663	0.35632	533.223
9075-121_3	K1024	0.136689	0.0645134	0.135646	0.185932	0.35632	533.997
8032-23_3	MCCD1	-0.0253323	0.0590216	0.135563	0.186472	0.35632	535.549
9340-17_3	FKB14	-0.202118	0.0566343	0.135646	0.185932	0.35632	533.997
10699-52_3	LRP1	-0.0339115	0.0560432	0.135604	0.186202	0.35632	534.773
9102-28_3	ZFY27	0.0988368	0.05225	0.135646	0.185932	0.35632	533.997
7066-199_4	F209B	-0.310427	0.0491091	0.135771	0.185124	0.35632	531.676
4144-13_1	MCP-4	0.108302	0.0426273	0.135771	0.185124	0.35632	531.676
10660-33_3	S35B3	0.186755	0.0307806	0.135563	0.186472	0.35632	535.549
8485-7_3	KEAP1	0.587817	0.0241926	0.135604	0.186202	0.35632	534.773
3321-2_2	IL24	0.0623986	0.00980172	0.135646	0.185932	0.35632	533.997
3457-57_1	Periostin	-0.0981894	-0.0405518	0.135604	0.186202	0.35632	534.773
2666-53_2	Bone proteoglycan II	-0.0554888	-0.0408443	0.135646	0.185932	0.35632	533.997
5132-71_3	TCCR	-0.375966	-0.043722	0.135604	0.186202	0.35632	534.773
6641-60_3	PolyUbiquitin K48	-0.0499323	-0.057684	0.135563	0.186472	0.35632	535.549
9573-108_3	TXD11	0.736927	0.0167577	0.13548	0.187014	0.357117	537.104
10713-151_3	CLM7	0.21471	0.0422245	0.135397	0.187557	0.357915	538.662
3366-51_2	ECM1	-0.0433235	-0.059722	0.135355	0.187828	0.358196	539.443
3067-67_1	GDF-9	0.323447	0.0573988	0.135314	0.1881	0.358239	540.225
9218-7_3	Fas, soluble	-0.482483	-0.045502	0.135314	0.1881	0.358239	540.225
3348-49_2	BMP-1	0.0893331	0.069239	0.135231	0.188646	0.359039	541.79
5664-57_3	D106A	0.355986	0.070761	0.135189	0.188919	0.359321	542.574
2468-62_3	MIP-3a	-0.00836655	0.0276212	0.135147	0.189192	0.359603	543.359
3179-51_2	Cathepsin A	0.0373797	0.119973	0.135064	0.18974	0.360167	544.932
3143-3_1	sCD4	0.0455647	0.0307489	0.135064	0.18974	0.360167	544.932
6213-10_3	CGB2	-0.0721134	0.0611653	0.135023	0.190014	0.360211	545.72
3403-1_2	TPSB2	-0.0609762	-0.0329056	0.135023	0.190014	0.360211	545.72
4397-26_2	IFN-lambda 2	-0.00345117	0.0129454	0.134981	0.190288	0.360256	546.508
5689-1_3	DB112	-0.424965	-0.104481	0.134981	0.190288	0.360256	546.508
5033-27_1	Tropomyosin 1 alpha chain	-0.726246	0.0547029	0.134774	0.191666	0.362625	550.465
4973-18_1	cIAP-2	0.0257077	-0.00800166	0.134732	0.191942	0.362909	551.259
11505-1_3	CD38	-0.008304	0.0909092	0.13469	0.192219	0.363193	552.053
3534-14_2	CD40 ligand, soluble	-0.117172	-0.0110883	0.134649	0.192496	0.363477	552.849
5134-52_2	TIMD3	-0.0443314	-0.0282598	0.134192	0.195564	0.369028	561.661
9175-48_3	DSCAM	0.0154527	0.038055	0.134026	0.196689	0.370421	564.892
5340-24_3	Caspase-10	0.0622406	0.00516471	0.134026	0.196689	0.370421	564.892
7888-58_3	CCD56	0.0529987	0.00132895	0.134026	0.196689	0.370421	564.892
9468-8_3	Lectin, mannose-binding 2	0.0346643	0.0252126	0.133943	0.197254	0.370512	566.513
10424-31_3	NPDC1	-0.0623973	-0.0161732	0.133943	0.197254	0.370512	566.513
10560-1_3	ITM2C	-0.19908	-0.0170793	0.133943	0.197254	0.370512	566.513
10748-216_3	PCDB2	-0.0185976	-0.0390619	0.133984	0.196971	0.370512	565.702
3236-12_2	GSK-3 alpha/beta	-0.00801529	0.00634816	0.133901	0.197536	0.370558	567.325
4985-11_1	FABPE	-0.762027	-0.0188524	0.133901	0.197536	0.370558	567.325
5888-29_3	eIF-5A-1	0.0865679	0.0897551	0.133818	0.198103	0.370894	568.951
4487-1_1	FGF7	0.0797387	0.0377746	0.133818	0.198103	0.370894	568.951
8759-29_3	a1,4-Galactosyltransferase	-0.0803905	-0.0769616	0.133818	0.198103	0.370894	568.951
9177-6_3	FAM3B	0.168779	0.0774796	0.133776	0.198386	0.370941	569.766
10073-22_3	TYDP1	-0.431249	-0.00805789	0.133776	0.198386	0.370941	569.766
5346-24_3	CPNE1	-0.31799	0.0344018	0.133735	0.19867	0.370989	570.581
5947-90_3	Tpo	-0.331255	-0.0155167	0.133735	0.19867	0.370989	570.581
8897-3_3	L37A2	-0.01862	0.0426863	0.133652	0.199239	0.371809	572.215
5412-53_3	CD27	-0.0155775	-0.0558029	0.13361	0.199524	0.372099	573.033
9090-9_3	SYTL4	0.126741	0.168542	0.133527	0.200095	0.372921	574.672
5885-55_3	eIF-4H	0.0733883	0.0959555	0.133361	0.20124	0.373119	577.961
5486-73_3	sICAM-2	0.0345306	0.0549635	0.133403	0.200953	0.373119	577.137
8769-30_3	TXD11	-0.163289	0.0523937	0.133361	0.20124	0.373119	577.961
9097-5_3	K1324	-0.031523	0.0467413	0.133486	0.20038	0.373119	575.493
2939-10_2	Artemin	0.0267947	0.0281287	0.133361	0.20124	0.373119	577.961
10054-3_3	GAN	-0.950936	-0.0330274	0.133361	0.20124	0.373119	577.961
3488-64_2	Catalase	-0.00822318	-0.0717616	0.133444	0.200667	0.373119	576.314
9758-17_3	RS4X	-0.0496228	-0.0897104	0.133361	0.20124	0.373119	577.961
3739-72_4	gpIIbIIIa	0.168934	0.111251	0.133278	0.201814	0.373942	579.611
3434-34_1	FN1,3	0.0641845	0.0376489	0.133195	0.20239	0.374526	581.264
10462-14_3	INSL5	-0.182202	-0.0922977	0.133195	0.20239	0.374526	581.264
8055-33_3	IDD	-0.132947	0.0439377	0.133153	0.202678	0.374628	582.092
3413-50_2	BFL1	-0.0285896	-0.0175821	0.133112	0.202967	0.374628	582.921
2829-19_2	IL-27	-0.0636231	-0.0231829	0.133112	0.202967	0.374628	582.921
3890-8_2	LDH-H 1	-0.0875986	-0.0530648	0.133112	0.202967	0.374628	582.921
10034-16_3	FRK	0.0997379	0.0350731	0.132987	0.203835	0.375988	585.414
8956-96_3	SREC-II	-0.054743	-0.0350038	0.132447	0.207629	0.382741	596.31
5404-53_3	DR6	-0.0370181	-0.0347767	0.132364	0.208217	0.383579	598
3283-21_1	BGH3	-0.0466663	-0.0407389	0.132322	0.208512	0.383876	598.846
4721-54_2	TFF3	0.374498	0.015305	0.132281	0.208807	0.384173	599.694
8909-77_3	GNPI1	-0.0834689	0.00922508	0.132239	0.209102	0.38447	600.542
7234-12_3	GT252	-0.746643	0.039049	0.132156	0.209694	0.385311	602.241
7223-60_3	S100A13	0.172219	0.172086	0.13199	0.210881	0.38568	605.651
10533-1_3	PCDA4	0.0727467	0.0729583	0.131865	0.211775	0.38568	608.218
6257-56_3	CGRE1	0.0812015	0.0649152	0.131948	0.211179	0.38568	606.505
4393-3_1	FGF-16	0.150334	0.060817	0.13199	0.210881	0.38568	605.651
8394-56_3	RNase 2	0.0417043	0.0482226	0.131948	0.211179	0.38568	606.505
2805-6_2	ACE2	0.115989	0.0473671	0.131907	0.211477	0.38568	607.361
4138-25_2	IL-20	0.140537	0.0424142	0.131865	0.211775	0.38568	608.218
8793-13_3	ALKB5	-0.0234878	0.0419194	0.132032	0.210584	0.38568	604.797
5735-54_3	C1GLC	0.00624476	0.0359414	0.132032	0.210584	0.38568	604.797
3896-5_2	Phosphoglycerate mutase 1	-0.74334	-0.0180376	0.131948	0.211179	0.38568	606.505
2763-66_2	FGF-20	-0.0210493	-0.0373384	0.132073	0.210287	0.38568	603.944
5112-73_3	OX2G	0.0217274	-0.0390915	0.131865	0.211775	0.38568	608.218
9789-52_3	Nesprin-2	0.0321656	-0.043806	0.132073	0.210287	0.38568	603.944
3583-54_4	Arylsulfatase A	0.24998	-0.0806277	0.131865	0.211775	0.38568	608.218
4464-10_2	Sialoadhesin	0.0104451	0.0394533	0.131824	0.212073	0.385979	609.075
5713-9_3	IFN-lambda 3	0.233676	0.0759489	0.131782	0.212372	0.386278	609.933
5061-27_3	B7-H2	-0.0151954	0.143613	0.131741	0.212672	0.386333	610.793
8978-30_3	M4K3	-0.0592317	0.0370192	0.131741	0.212672	0.386333	610.793
3866-7_2	SBDS	0.0410075	0.0455524	0.131658	0.213271	0.387177	612.514
4126-22_1	BPI	0.262258	0.170645	0.131575	0.213872	0.387777	614.239
2603-61_2	B7	-0.0614031	-0.0203716	0.131575	0.213872	0.387777	614.239
5105-2_3	Nogo Receptor	-0.0767143	-0.0315738	0.131533	0.214172	0.388078	615.103
3813-3_2	FYN	0.121515	0.0816804	0.131367	0.215379	0.388548	618.568
3872-2_1	TCTP	0.0905125	0.0659536	0.131367	0.215379	0.388548	618.568
5733-61_3	IFN10	-0.635722	0.0262145	0.13145	0.214775	0.388548	616.834
9319-59_3	TMED4	1.70391	0.01556	0.131367	0.215379	0.388548	618.568
7262-191_3	CHSTE	-0.208856	0.00655896	0.131367	0.215379	0.388548	618.568
8039-41_3	F177A	-0.0552839	-0.00861826	0.131408	0.215077	0.388548	617.701
2875-15_2	TBP	0.0655885	-0.0433454	0.131367	0.215379	0.388548	618.568
8795-48_3	TR	0.131963	0.0897148	0.131242	0.216287	0.388721	621.177
4490-65_2	IL-3 Ra	0.0215754	0.033715	0.131242	0.216287	0.388721	621.177
6604-59_3	CD031	0.0853833	0.01582	0.131242	0.216287	0.388721	621.177
5651-50_3	PSG7	-0.0842961	0.0147783	0.131242	0.216287	0.388721	621.177
6986-17_3	HS3SB	-0.0412018	-0.00363042	0.131242	0.216287	0.388721	621.177
10631-9_3	PGRC2	-0.198309	-0.0136828	0.131325	0.215681	0.388721	619.437
8386-11_3	PATE	-0.0797037	-0.000801841	0.131201	0.216591	0.389023	622.048
8762-38_3	CD70	0.674313	0.0103839	0.131159	0.216894	0.389325	622.921
9713-67_3	PGFRL	0.00176892	0.0967787	0.130661	0.220565	0.395172	633.461
5069-9_3	DAF	-0.0532257	-0.00444419	0.130661	0.220565	0.395172	633.461
5140-56_3	UNC5H4	-0.0880969	-0.0676291	0.130661	0.220565	0.395172	633.461
5699-19_3	CI061	-0.0261954	-0.112098	0.130619	0.220872	0.395477	634.346
8060-7_3	NRG2	-0.169047	0.0571584	0.130494	0.221798	0.396207	637.005
9202-309_3	ATPO	0.124003	0.0542297	0.130453	0.222108	0.396207	637.893
5059-8_3	AMHR2	0.0605226	0.0535942	0.130453	0.222108	0.396207	637.893
10416-79_3	MT1F	0.0795602	0.0256163	0.130494	0.221798	0.396207	637.005
2816-50_2	BCAM	-0.0231512	-0.0154409	0.130494	0.221798	0.396207	637.005
5036-50_1	TSG-6	-0.0604414	-0.0685706	0.130453	0.222108	0.396207	637.893
6578-29_3	TNMD	-0.333981	0.0133597	0.130411	0.222417	0.396513	638.782
7992-3_3	TMIE	0.366953	0.0364153	0.130328	0.223037	0.397372	640.563
6373-54_3	SEMG2	0.0132265	-0.1666	0.130204	0.22397	0.398786	643.242
7944-1_3	KI3L3	0.286045	0.0724456	0.130162	0.224282	0.399094	644.137
7875-86_3	PLEK	0.113527	0.130283	0.130079	0.224906	0.399215	645.929
9536-16_3	EP3A	0.00548503	-0.0554203	0.130079	0.224906	0.399215	645.929
6448-36_3	Sema E	0.100229	-0.0659687	0.13012	0.224594	0.399215	645.033
10439-57_3	Alpha-amylase 2B	-0.0659901	-0.0846215	0.130079	0.224906	0.399215	645.929
7241-12_3	CD3-zeta	0.0836511	-0.0574862	0.129996	0.225531	0.400078	647.726
9921-14_3	FBXL4	-0.821186	0.161438	0.129954	0.225844	0.400139	648.625
8305-18_3	SULF2	-0.0750526	-0.0409444	0.129954	0.225844	0.400139	648.625
8015-144_3	CHCH2	0.0517912	-0.0496265	0.129913	0.226158	0.400447	649.526
3404-51_2	TPSG1	-0.094227	-0.0141831	0.12983	0.226786	0.401312	651.329
7897-75_3	DLG3	0.436099	0.0212732	0.129705	0.227731	0.402735	654.042
9981-18_3	K1467	-1.14043	-0.022434	0.129663	0.228046	0.403045	654.948
4914-10_1	HCG	-0.0471715	0.0860203	0.129622	0.228362	0.403107	655.856
9170-24_3	IL-17	-0.240288	0.028498	0.129622	0.228362	0.403107	655.856
2575-5_5	Leptin	-0.11815	-0.0557026	0.129539	0.228995	0.403976	657.673
6571-75_3	CQ078	-0.659895	0.0566532	0.129414	0.229946	0.405157	660.405
6430-36_3	F19A2	-1.11157	0.00930212	0.129414	0.229946	0.405157	660.405
6948-82_3	FIG4	-0.310159	0.0905022	0.129373	0.230264	0.405468	661.318
3030-3_2	DC-SIGNR	-0.0361484	-0.0297012	0.128957	0.23346	0.410845	670.498
3446-7_2	IL-18 Ra	0.02392	-0.022367	0.128916	0.233782	0.410907	671.422
5837-49_3	LIF sR	-0.0314706	-0.0679735	0.128916	0.233782	0.410907	671.422
5618-50_3	FAM3B	0.0568545	0.0547443	0.128874	0.234104	0.410969	672.346
9343-16_3	IL-2 sRb	0.0501511	0.0130638	0.128874	0.234104	0.410969	672.346
9757-29_3	ENAH	0.0528313	0.00999248	0.128708	0.235394	0.41273	676.052
10514-5_3	PGD2 synthase	-0.0175779	-0.0214479	0.128708	0.235394	0.41273	676.052
9018-38_3	PCD10	0.0499147	0.103803	0.128625	0.236042	0.412857	677.911
3605-77_4	MASP3	0.0494538	0.0353962	0.128625	0.236042	0.412857	677.911
4997-19_1	IF4A3	-0.731962	0.0254737	0.128625	0.236042	0.412857	677.911
11510-51_3	Apo L1	-0.0559811	-0.084935	0.128666	0.235718	0.412857	676.981
7975-97_3	UNC5A	0.731619	0.0539756	0.128583	0.236366	0.413172	678.842
10638-1_3	TINF2	-0.453829	0.0687015	0.1285	0.237015	0.413804	680.707
7999-23_3	CD39	0.134072	0.0629585	0.1285	0.237015	0.413804	680.707
6385-63_3	VWA1	0.0785162	0.0636435	0.128459	0.23734	0.413868	681.641
4545-53_3	DnaJ homolog	0.139494	0.0436911	0.128459	0.23734	0.413868	681.641
5337-64_3	B7-2	-0.164916	0.0611508	0.128334	0.238317	0.41532	684.448
8100-15_3	ADM2	0.0904756	0.060852	0.128292	0.238644	0.415637	685.385
10419-1_3	SCAR5	-0.0801935	-0.0444699	0.128209	0.239298	0.416523	687.264
10511-10_3	Collagen alpha-3(VI)	-0.204382	-0.135976	0.128168	0.239625	0.416841	688.204
2977-7_2	EDAR	-0.0628601	-0.046963	0.128126	0.239953	0.417158	689.146
3486-58_2	b-ECGF	0.0108853	0.035135	0.128085	0.240281	0.417224	690.088
9925-56_3	SREC-II	-0.054315	-0.0601488	0.128085	0.240281	0.417224	690.088
3892-21_2	MED-1	0.0405859	0.0694968	0.128043	0.24061	0.417289	691.031
3807-1_2	FGF23	0.239296	0.0690217	0.128043	0.24061	0.417289	691.031
9258-14_3	CXAR	0.225409	0.0449338	0.128002	0.240939	0.417356	691.976
9581-4_3	PRP6	-0.129638	-0.0100739	0.128002	0.240939	0.417356	691.976
3820-68_2	MAPK2	-0.155663	0.0650843	0.127794	0.242588	0.419453	696.712
4137-57_2	IL-17E	-0.0968319	0.0063291	0.127794	0.242588	0.419453	696.712
4471-50_2	TGM3	-0.0909371	-0.0199586	0.127794	0.242588	0.419453	696.712
4568-17_2	SLIK5	-0.0887839	-0.0163191	0.127254	0.246915	0.426422	709.139
4588-1_2	PH	0.0292696	-0.0779413	0.127254	0.246915	0.426422	709.139
2612-5_2	eIF-5	0.914888	0.0557687	0.127088	0.248258	0.428035	712.996
10337-83_3	CEBPB	0.212773	0.000935823	0.127046	0.248594	0.428035	713.962
7959-34_3	CADH7	0.00763875	-0.00242926	0.127046	0.248594	0.428035	713.962
3387-1_2	PAK3	-0.0310993	-0.0338404	0.127046	0.248594	0.428035	713.962
9385-4_3	GAA	0.0358484	-0.046163	0.127046	0.248594	0.428035	713.962
7050-5_3	NEGR1	0.043666	-0.01294	0.127005	0.248931	0.428358	714.93
8233-2_3	ITIH5	0.0229043	-0.0400545	0.126921	0.249606	0.429262	716.868
9114-84_3	UROL1	-0.0725887	-0.0292615	0.12688	0.249944	0.429329	717.838
9317-4_3	LRC25	0.152262	-0.0377792	0.12688	0.249944	0.429329	717.838
5825-49_3	IFN-g R1	-0.155807	0.0390756	0.126838	0.250282	0.429397	718.81
3196-6_2	HPLN1	-0.217806	-0.116375	0.126838	0.250282	0.429397	718.81
8931-124_3	G0S2	-0.369868	-0.0318618	0.126797	0.250621	0.429464	719.782
9837-60_3	NAD(P)H dehydrogenase	-0.156329	-0.120135	0.126797	0.250621	0.429464	719.782
8479-4_3	MMP-10	0.0598135	0.185766	0.126755	0.250959	0.429533	720.756
8257-71_3	NEU1	0.354532	0.0469201	0.126755	0.250959	0.429533	720.756
5115-31_3	RELT	-0.0566694	-0.0635455	0.126672	0.251638	0.430438	722.705
10635-33_3	F159B	-0.0867651	-0.0885089	0.126589	0.252319	0.431345	724.659
3855-56_1	Peroxiredoxin-1	0.0884804	0.0257636	0.126506	0.253	0.432252	726.616
8992-1_3	TMEM2	0.137498	0.0236966	0.126464	0.253341	0.432321	727.597
5731-1_3	ISK6	-0.156074	-0.1036	0.126464	0.253341	0.432321	727.597
7208-60_3	MGT4C	1.57633	0.0588084	0.126381	0.254025	0.43253	729.56
5464-52_3	GRB2 adapter protein	0.110958	0.0563228	0.126423	0.253683	0.43253	728.578
9887-40_3	RBBP6	-0.116918	0.0350896	0.12634	0.254367	0.43253	730.543
9197-4_3	LEG9	0.00333097	0.0272011	0.12634	0.254367	0.43253	730.543
9550-153_3	TTC17	0.547691	0.0152152	0.12634	0.254367	0.43253	730.543
6612-90_3	CP079	0.0690403	-0.0147686	0.12634	0.254367	0.43253	730.543
5743-82_3	CART	0.00646374	0.019071	0.126091	0.256428	0.435519	736.462
9508-104_3	COLQ	-0.122886	0.0168093	0.126091	0.256428	0.435519	736.462
9984-12_3	YIPF6	-0.132958	-0.00612025	0.126049	0.256773	0.435589	737.452
3423-59_2	Chymase	0.0594462	-0.0551127	0.126049	0.256773	0.435589	737.452
6219-14_3	PDZ11	-0.141436	0.0433632	0.126007	0.257118	0.435917	738.443
5736-1_3	TRML2	-0.00660425	-0.00631054	0.12555	0.260936	0.441868	749.408
2631-50_2	IL-10 Rb	-0.0318474	-0.0124635	0.12555	0.260936	0.441868	749.408
2668-70_2	Calpain I	0.0681698	0.019094	0.125467	0.261635	0.442529	751.415
9730-22_3	GHDC	0.00217976	-0.0294389	0.125467	0.261635	0.442529	751.415
3898-5_2	PSD7	-0.230065	0.0173469	0.125426	0.261984	0.44286	752.419
5002-76_1	MMP-14	0.140347	0.0557033	0.125384	0.262335	0.442931	753.425
2677-1_1	ERBB1	-0.0331096	-0.0204828	0.125384	0.262335	0.442931	753.425
10527-22_3	DHX9	0.127724	-0.0290912	0.125343	0.262685	0.443262	754.432
7758-217_3	RN215	0.190958	0.0604536	0.12526	0.263387	0.443664	756.448
8964-14_3	EMIL3	0.112604	0.0523178	0.12526	0.263387	0.443664	756.448
10696-217_3	LPPRC	-0.103743	-0.0804208	0.12526	0.263387	0.443664	756.448
5271-5_1	RAC3	0.0130125	0.0546408	0.125218	0.263739	0.443736	757.457
9850-38_3	IF1AX	0.0350469	0.04876	0.125218	0.263739	0.443736	757.457
9893-27_3	Ornithine decarboxylase antizyme	-0.191939	0.0465862	0.125135	0.264443	0.4444	759.479
3388-58_2	PAK7	-0.012768	0.0186863	0.125135	0.264443	0.4444	759.479
5196-7_3	NMT1	0.0166469	0.0126251	0.12501	0.265501	0.445918	762.52
6462-12_3	TIMP-4	0.0493298	0.0965514	0.124969	0.265855	0.44599	763.536
4557-61_2	KIRR3	-0.000772233	0.0376988	0.124969	0.265855	0.44599	763.536
3004-67_2	PD-L2	0.0556548	0.0841328	0.124844	0.266918	0.446209	766.588
9506-10_3	Apo L1	-0.0110099	0.0572465	0.124844	0.266918	0.446209	766.588
2640-3_2	MSP R	-0.00576731	-0.0245215	0.124844	0.266918	0.446209	766.588
3284-75_1	BGN	-0.0572095	-0.063799	0.124927	0.266209	0.446209	764.552
10852-114_3	HNRDL	-0.0260222	-0.0803901	0.124886	0.266563	0.446209	765.569
9531-24_3	LST1	-0.0472164	-0.087009	0.124844	0.266918	0.446209	766.588
8601-167_3	sLRP1	-0.687178	0.034403	0.124803	0.267273	0.446543	767.607
10760-107_3	GRIA4	0.024015	0.0644293	0.124678	0.26834	0.447804	770.671
8315-5_3	DB119	-0.212322	0.031365	0.124678	0.26834	0.447804	770.671
3305-6_1	DLL4	0.0681275	0.0195595	0.124636	0.268696	0.447879	771.695
7995-16_3	VWC2L	-0.089251	0.0118416	0.124636	0.268696	0.447879	771.695
9962-1_3	MUCDL	0.0466774	-0.0183052	0.124595	0.269053	0.447953	772.719
3343-1_4	Aminoacylase-1	-0.166653	-0.0838452	0.124595	0.269053	0.447953	772.719
6256-9_3	LY66C	0.177127	0.0815688	0.124553	0.26941	0.448028	773.745
10885-36_3	CF089	-0.154185	-0.036509	0.124553	0.26941	0.448028	773.745
7982-10_3	RM32	0.789144	0.0413833	0.124512	0.269767	0.448103	774.771
10894-25_3	Secretagogin	-0.93691	-0.049225	0.124512	0.269767	0.448103	774.771
7841-84_3	ESAM	-0.0680214	-0.0330436	0.124429	0.27052	0.449095	776.934
3037-62_1	IL-1b	0.134125	0.0521845	0.124387	0.270878	0.44917	777.962
3832-51_1	PTK6	-0.564119	0.008474	0.124387	0.270878	0.44917	777.962
7892-132_3	K1467	-0.358668	0.0820321	0.124304	0.271596	0.449322	780.022
10037-98_3	SIG12	-0.336666	0.0316398	0.124304	0.271596	0.449322	780.022
6912-6_3	EFHA2	-0.336879	0.0232474	0.124304	0.271596	0.449322	780.022
8749-194_3	CD1D	-0.0754929	-0.00978261	0.124346	0.271237	0.449322	778.992
9245-1_3	KI2L4	-0.486953	0.00344151	0.124179	0.272674	0.450587	783.12
8377-87_4	SCG2	0.0595035	-0.00298989	0.124179	0.272674	0.450587	783.12
9277-16_3	PAP1	-0.0339985	-0.0331731	0.123847	0.275565	0.455103	791.424
8624-16_3	UNC5H4	-0.0569256	-0.0627343	0.123764	0.276292	0.45604	793.51
3459-49_2	PDGF Rb	-0.142579	-0.106194	0.123722	0.276655	0.456378	794.554
9043-7_3	TFP11	0.0431473	-0.0229782	0.123556	0.278113	0.458257	798.742
8528-74_3	ISLR2	-0.0318997	-0.0652892	0.123556	0.278113	0.458257	798.742
2455-17_4	IL-12	0.0141834	0.0332337	0.123515	0.278479	0.458596	799.791
3758-63_3	Activated Protein C	0.0793426	0.0446597	0.123473	0.278845	0.458672	800.842
9316-67_3	WFDC1	-0.0718901	-0.0826592	0.123473	0.278845	0.458672	800.842
6415-90_3	CPN2	0.0342255	0.053419	0.12339	0.279577	0.459351	802.945
10336-3_3	CHIP	-0.359905	-0.0611423	0.12339	0.279577	0.459351	802.945
10047-12_3	NCF-2	-0.0506045	0.0901686	0.123265	0.280678	0.460633	806.109
10667-78_3	CA185	0.098541	0.0487097	0.123265	0.280678	0.460633	806.109
9913-4_3	RRBP1	0.163168	0.0415568	0.123224	0.281046	0.460711	807.165
8325-37_3	ADH4	-0.0685154	-0.14493	0.123224	0.281046	0.460711	807.165
7187-3_3	PPM1L	-0.0223783	0.055288	0.123182	0.281414	0.460788	808.222
9478-69_3	KPRA	-0.220924	0.0386334	0.123182	0.281414	0.460788	808.222
7928-183_3	TPST1	0.0295285	0.0513454	0.123141	0.281783	0.460866	809.281
9790-28_3	BR serine/threonine kinase 2	0.0400204	0.0356538	0.123141	0.281783	0.460866	809.281
4925-54_2	MMP-13	0.0794747	-0.065238	0.123099	0.282152	0.461207	810.34
10081-17_3	SATB2	0.0192666	0.0435405	0.123058	0.282521	0.461547	811.4
8061-102_3	F171B	1.80171	0.0271562	0.123016	0.282891	0.461888	812.462
9055-81_3	MYZAP	0.120762	0.0487795	0.122892	0.284001	0.463175	815.652
9387-13_3	CL049	0.306048	0.0185135	0.122892	0.284001	0.463175	815.652
5677-15_3	CB066	-0.0147841	0.0284218	0.12285	0.284372	0.463413	816.717
8097-77_3	LIPN	0.114783	0.0263488	0.122767	0.285115	0.463413	818.851
9543-131_3	COG8	0.308281	0.0245888	0.122808	0.284744	0.463413	817.784
10710-23_3	ZPBP2	-0.157425	0.00703623	0.122767	0.285115	0.463413	818.851
9832-33_3	HGD	-0.183866	-0.00902628	0.122808	0.284744	0.463413	817.784
9256-78_3	NPTX1	-0.0859676	-0.0586597	0.122767	0.285115	0.463413	818.851
7224-11_3	TRAT1	0.534523	0.0217056	0.122684	0.28586	0.46436	820.989
6424-2_3	RNS13	0.0361265	0.0154626	0.122642	0.286232	0.464703	822.059
3800-71_2	CK-BB	0.417171	-0.0189343	0.122102	0.291109	0.472353	836.065
3364-76_2	Cathepsin V	-0.0625856	-0.0663109	0.121978	0.292243	0.473925	839.321
5463-22_3	GAS1	0.105923	-0.0175266	0.121936	0.292621	0.474271	840.408
5129-12_3	SREC-I	0.0520998	0.0665144	0.121894	0.293	0.47435	841.497
5268-49_3	MMP-16	-0.0226503	0.00276684	0.121894	0.293	0.47435	841.497
3003-29_2	NKp30	-0.0108744	0.0310497	0.121853	0.29338	0.474429	842.586
9244-27_3	PPT1	-0.0117521	0.0166278	0.121853	0.29338	0.474429	842.586
2645-54_1	PKC-Z	0.0579404	0.0933189	0.121728	0.29452	0.475737	845.86
8800-14_3	TTC17	-2.60952	0.0226612	0.121728	0.29452	0.475737	845.86
3636-37_4	OLR1	0.302784	0.154737	0.121604	0.295663	0.476779	849.144
2723-9_2	IL-1F7	-0.0311408	0.0186986	0.121604	0.295663	0.476779	849.144
7747-47_3	NDUBB	-0.0310609	-0.047379	0.121604	0.295663	0.476779	849.144
9523-34_3	ITM2C	0.0959659	0.0522688	0.121562	0.296045	0.477127	850.24
5542-22_2	NRP1	0.0174617	0.0718937	0.121521	0.296427	0.477207	851.337
6651-74_3	PolyUbiquitin K48	0.00511802	-0.0320661	0.121521	0.296427	0.477207	851.337
10977-55_3	UCMA	-0.139252	0.107745	0.121437	0.297192	0.477369	853.535
3151-6_1	IL-2 sRa	-0.225906	0.0487353	0.121479	0.296809	0.477369	852.436
8876-51_3	NRX2B	-0.186893	0.0352474	0.121437	0.297192	0.477369	853.535
4494-63_2	IL-23	0.108591	0.0350168	0.121437	0.297192	0.477369	853.535
3390-72_2	PIK3CA/PIK3R1	-0.0878771	0.0407022	0.121313	0.298342	0.478949	856.839
5462-62_3	Ficolin-3	0.074376	0.0918311	0.121271	0.298727	0.479298	857.943
5714-88_3	IFNA6	0.0726482	0.00530839	0.121147	0.299881	0.480882	861.259
3056-11_1	NKG2D	0.649839	0.0229682	0.121064	0.300653	0.481581	863.475
5260-80_3	TYK2	0.0292173	-0.0146998	0.121064	0.300653	0.481581	863.475
7967-38_3	POTEM	-0.271068	-0.0275858	0.121022	0.301039	0.481931	864.584
3643-90_2	SLIK1	0.0596763	0.0473958	0.12098	0.301426	0.482013	865.695
2647-66_2	Rab GDP dissociation inhibitor beta	-0.0328941	-0.00347749	0.12098	0.301426	0.482013	865.695
2950-57_2	IGFBP-4	-0.041694	-0.00994138	0.120939	0.301813	0.482363	866.806
5130-67_3	SREC-II	0.0377387	0.0400676	0.120897	0.3022	0.482713	867.918
5035-7_1	TS	-0.479664	-0.00967756	0.120856	0.302588	0.483064	869.032
3877-67_2	CaMKK alpha	0.0631106	0.0245197	0.120814	0.302976	0.483415	870.146
7919-278_3	FAM3D	-0.551352	0.012687	0.120773	0.303364	0.483765	871.262
4963-19_1	ARP19	-0.220786	0.0323944	0.120731	0.303753	0.484117	872.378
10426-21_3	GOSR2	0.160919	0.0343236	0.120274	0.308052	0.490696	884.725
8048-9_3	FTMT	0.0434894	0.105983	0.12015	0.309232	0.490942	888.113
9373-405_3	APOO	0.114045	0.0391333	0.12015	0.309232	0.490942	888.113
4560-34_2	LCK	0.180329	0.0139368	0.120233	0.308445	0.490942	885.854
4220-39_2	FER	0.121387	0.0106666	0.12015	0.309232	0.490942	888.113
2859-69_2	HDAC8	-0.0660447	-0.0338788	0.12015	0.309232	0.490942	888.113
5084-154_3	IL-17B R	0.140631	-0.0654856	0.120191	0.308838	0.490942	886.983
8446-4_3	PACAP-27	0.36427	-0.00583206	0.120108	0.309626	0.491296	889.245
3324-51_1	LY9	0.0108505	0.0776564	0.120025	0.310415	0.491732	891.511
4322-28_3	AMNLS	0.226694	0.0163183	0.120025	0.310415	0.491732	891.511
9023-9_3	CD34	-0.141947	-0.0202554	0.120025	0.310415	0.491732	891.511
7898-29_3	MDM1	-0.119395	-0.0352692	0.1199	0.311601	0.493339	894.917
6238-55_3	PSG8	0.367357	0.051253	0.119859	0.311997	0.493422	896.055
5927-4_3	WISP-3	1.05703	0.0315497	0.119859	0.311997	0.493422	896.055
8018-43_3	VSIG2	-0.0309624	-0.0572775	0.119776	0.31279	0.494404	898.333
9073-35_3	FLVC1	0.0386532	-0.0546567	0.119734	0.313187	0.49476	899.473
10798-4_3	CLM2	-0.0664303	0.039478	0.119693	0.313585	0.495115	900.615
10039-32_3	PNP	0.0100254	0.07886	0.119651	0.313982	0.495199	901.757
2788-55_1	MMP-3	-0.108727	-0.0823676	0.119651	0.313982	0.495199	901.757
2429-27_4	C8	-0.0749803	-0.040416	0.119609	0.314381	0.495555	902.901
7191-32_3	SLMAP	0.224645	-0.108418	0.119568	0.314779	0.495911	904.045
9314-9_3	PSG5	0.37034	-0.0186235	0.119526	0.315178	0.496267	905.191
5459-33_3	CYTN	-0.0994142	0.104207	0.119485	0.315577	0.496623	906.337
4984-83_1	Esterase D	0.0370669	0.0147489	0.119402	0.316377	0.497609	908.633
6377-54_3	LYZL2	-0.188131	0.00325596	0.11936	0.316777	0.497965	909.783
8016-19_3	DNJC4	-0.119842	0.017449	0.119319	0.317177	0.498322	910.933
9843-5_3	ACTN1	0.0124737	0.079858	0.119194	0.318381	0.498663	914.391
8631-13_3	ERMAP	1.49224	0.0351382	0.119152	0.318783	0.498663	915.546
7784-1_3	Kininogen, HMW	0.021509	0.0030094	0.119152	0.318783	0.498663	915.546
8256-57_3	RANK	-0.376178	-0.0023366	0.119194	0.318381	0.498663	914.391
5657-28_3	SIA4A	-0.00521617	-0.0033573	0.119194	0.318381	0.498663	914.391
8310-6_3	U773	-0.0865797	-0.0378636	0.119277	0.317578	0.498663	912.085
4145-58_2	Neurotrophin-3	-0.176261	-0.0379528	0.119236	0.31798	0.498663	913.238
5636-10_3	MFAP4	-0.0782247	-0.0783602	0.119152	0.318783	0.498663	915.546
6413-79_3	LIPK	-0.0518672	0.0426894	0.119111	0.319186	0.499021	916.701
3418-12_2	CAMK1D	-0.0151901	0.0033977	0.118654	0.323634	0.505426	929.478
9233-71_3	TFPI -2	0.381061	0.00302611	0.118654	0.323634	0.505426	929.478
8983-7_3	GOLM1	0.00912607	0.00376928	0.118612	0.324041	0.505786	930.646
9204-33_3	Corticotropin-lipotropin	-0.00103998	0.0437555	0.118446	0.325671	0.505855	935.326
9719-145_3	MMP-16	0.155853	0.0397499	0.118488	0.325263	0.505855	934.154
10671-67_3	CALY	-0.154626	0.0290955	0.118529	0.324855	0.505855	932.984
5004-69_1	MK11	0.361442	0.00983292	0.118488	0.325263	0.505855	934.154
5001-6_2	Mammaglobin 2	-0.0155949	0.00815712	0.118446	0.325671	0.505855	935.326
9931-20_3	Keratin-1	-0.0701856	-0.0133117	0.118446	0.325671	0.505855	935.326
3518-54_2	TAFI	-0.020523	-0.0174596	0.118571	0.324448	0.505855	931.814
3521-16_2	TSH	-0.151999	-0.0610958	0.118529	0.324855	0.505855	932.984
5012-67_1	Myokinase, human	-0.000824331	-0.0827379	0.118488	0.325263	0.505855	934.154
8864-59_3	CENPW	-0.199825	0.0388356	0.118363	0.326487	0.50685	937.672
11514-196_3	CD59	0.0158234	0.030141	0.11828	0.327306	0.507571	940.022
9848-22_3	Cyclin H	0.0397109	-0.0345517	0.11828	0.327306	0.507571	940.022
10716-35_3	PSMD5	0.417611	0.0230818	0.118238	0.327715	0.507658	941.199
3469-74_1	RPS6KA3	-0.0220685	-0.0646944	0.118238	0.327715	0.507658	941.199
6290-3_3	UTS2B	0.678159	0.0629556	0.118155	0.328536	0.508381	943.555
9095-5_3	MTFR1	-0.285691	-0.0430083	0.118155	0.328536	0.508381	943.555
3685-53_1	MFRP	0.0208662	0.0926865	0.118114	0.328947	0.508742	944.734
2760-2_2	DRR1	-0.380733	0.137006	0.117948	0.330593	0.509095	949.463
8274-64_3	Syntaxin-7	-0.0102518	0.051821	0.117989	0.330181	0.509095	948.279
3505-6_2	Lymphotoxin a1/b2	-0.0467348	-0.0258599	0.117989	0.330181	0.509095	948.279
2614-28_2	Ephrin-A4	-0.0250242	-0.0369588	0.117948	0.330593	0.509095	949.463
8374-5_3	NGF R	0.0692089	-0.0398958	0.117948	0.330593	0.509095	949.463
7903-18_3	VAMP3	-0.289497	-0.0501539	0.117948	0.330593	0.509095	949.463
5484-63_3	RS3A	-0.0553574	-0.0666751	0.118031	0.329769	0.509095	947.097
8458-16_3	a-Synuclein	-0.00318777	-0.134338	0.118031	0.329769	0.509095	947.097
5246-64_3	cGMP-stimulated PDE	0.040214	0.081019	0.117865	0.331418	0.509274	951.833
10013-34_3	K0319	-0.0817956	0.0279734	0.117865	0.331418	0.509274	951.833
2773-50_2	IL-10	-0.175959	0.0230472	0.117865	0.331418	0.509274	951.833
9584-105_3	RMTL1	-0.0482038	-0.0351076	0.117865	0.331418	0.509274	951.833
9754-33_3	Quinone reductase 2	2.14156	0.0584644	0.117823	0.331831	0.509636	953.019
3217-74_2	Protease nexin I	0.260742	0.0586873	0.117781	0.332245	0.509726	954.207
2945-25_1	ER	-0.0185046	0.0455167	0.117781	0.332245	0.509726	954.207
6035-2_3	SIAT1	0.00904704	0.00188896	0.11774	0.332659	0.510088	955.395
8683-119_3	PILRA	0.062073	0.0799343	0.117615	0.333902	0.51163	958.967
7189-55_3	CHST3	-0.474868	0.0275762	0.117574	0.334317	0.51163	960.16
8700-325_3	GLT11	-0.0630006	0.0228631	0.117532	0.334733	0.51163	961.353
7732-45_3	VAMP4	0.369399	0.0175033	0.117532	0.334733	0.51163	961.353
4986-59_1	FAK1	-0.0987937	0.01373	0.117532	0.334733	0.51163	961.353
8280-238_3	Vitronectin	-0.0419751	-0.00845317	0.117532	0.334733	0.51163	961.353
6296-36_3	OIT3	0.0677325	0.0498373	0.117491	0.335149	0.511721	962.548
5094-62_3	JAML1	-0.0370085	-0.0246746	0.117491	0.335149	0.511721	962.548
3723-1_2	BNP-32	0.0175539	-0.00760338	0.117449	0.335565	0.511813	963.743
8036-75_3	FSHB	-0.218257	-0.0152562	0.117449	0.335565	0.511813	963.743
7118-24_3	IGDC3	-0.0633329	0.00280623	0.117366	0.336399	0.51254	966.137
3836-51_2	UFM1	-0.0811467	-0.0182371	0.117366	0.336399	0.51254	966.137
10663-42_3	INSI1	0.0255704	0.0182826	0.117324	0.336816	0.512903	967.336
5739-75_3	KTDAP	0.00631226	0.00601861	0.116867	0.341429	0.519653	980.585
8259-25_3	B3GN1	0.124621	0.0205656	0.116826	0.341851	0.520019	981.796
5114-65_3	Prolactin Receptor	-0.0873088	-0.041484	0.116784	0.342273	0.520385	983.007
3421-54_2	CD30 Ligand	-0.0778297	0.0141887	0.116618	0.343963	0.522402	987.863
2602-2_2	Angiopoietin-2	0.0339845	-0.00682895	0.116618	0.343963	0.522402	987.863
5349-69_3	DLL1	-0.060227	0.0242655	0.116577	0.344387	0.522493	989.079
3466-8_2	PRKACA	-0.107071	-0.0147493	0.116577	0.344387	0.522493	989.079
9190-7_3	CD63	0.0203948	0.0518787	0.11641	0.346085	0.524792	993.955
6409-57_3	GP116	0.0426672	0.156817	0.116286	0.347362	0.525618	997.622
3487-32_2	BLC	0.117379	0.145137	0.116286	0.347362	0.525618	997.622
3828-54_2	PDGF-CC	-0.0207322	0.0478375	0.116286	0.347362	0.525618	997.622
4271-75_2	PFD5	0.152013	0.0376174	0.116286	0.347362	0.525618	997.622
8993-151_3	RIPK2	0.130125	0.0206115	0.116244	0.347788	0.525986	998.847
8949-3_3	NGF R	-0.119701	-0.043426	0.116161	0.348641	0.526722	1001.3
8300-82_3	PEX14	-0.0907427	-0.0623439	0.116161	0.348641	0.526722	1001.3
9426-73_3	ID2	-0.062541	0.0423608	0.115995	0.350353	0.529029	1006.21
7951-146_3	FCRL2	-0.0676996	0.0463827	0.115912	0.351211	0.529767	1008.68
3730-81_2	TNR4	-0.0389058	0.00500306	0.115912	0.351211	0.529767	1008.68
7020-13_3	CHST5	-0.0229223	0.0577147	0.115829	0.35207	0.530228	1011.14
2966-65_2	SCGF-beta	0.00176329	0.00941496	0.115829	0.35207	0.530228	1011.14
2906-55_3	IL-4	-0.0614664	-0.000766764	0.115829	0.35207	0.530228	1011.14
8023-23_3	IRK11	-1.08004	-0.0379218	0.115787	0.3525	0.530598	1012.38
5016-61_2	PARK7	-0.126362	0.00198468	0.115621	0.354224	0.532634	1017.33
8913-22_3	SIG11	-0.0857342	-0.013118	0.115621	0.354224	0.532634	1017.33
7986-98_3	NALD2	0.0158986	0.00437163	0.115164	0.358993	0.53924	1031.03
9038-12_3	JTB	0.107889	-0.0281979	0.115164	0.358993	0.53924	1031.03
6895-1_3	TR	0.111874	-0.0129848	0.115081	0.359864	0.540267	1033.53
5494-52_3	RUXF	0.0473267	-0.00493391	0.115039	0.360301	0.540639	1034.78
5676-54_3	ASIP	-0.00993194	0.0401424	0.114915	0.361611	0.54091	1038.55
8297-8_3	DJC10	-0.121573	0.0241919	0.114915	0.361611	0.54091	1038.55
7203-125_3	RFNG	-0.00523855	0.021631	0.114915	0.361611	0.54091	1038.55
10553-8_3	TOIP2	0.0465446	0.0168903	0.114915	0.361611	0.54091	1038.55
3199-54_2	kallikrein 12	-0.00266659	-0.0046417	0.114956	0.361174	0.54091	1037.29
4911-49_2	Glutathione S-transferase Pi	0.220798	-0.0353967	0.114956	0.361174	0.54091	1037.29
3201-49_2	kallikrein 5	0.00446658	0.0404171	0.114873	0.362049	0.541002	1039.81
4249-64_2	NDP kinase B	0.00933664	-0.0404684	0.114873	0.362049	0.541002	1039.81
4771-10_3	ASM3A	-0.089271	0.0863649	0.114832	0.362487	0.541374	1041.06
5335-73_3	annexin VI	-0.0149632	0.0309208	0.11479	0.362925	0.541747	1042.32
9321-400_3	NMB	-0.070573	-0.0516739	0.114624	0.364682	0.544087	1047.37
6923-1_3	PLOD2	-0.11201	-0.0821196	0.114541	0.365563	0.545117	1049.9
8825-4_3	PILRA	0.0961626	0.0320533	0.114416	0.366886	0.546523	1053.7
6364-7_3	TPSNR	0.0522781	-0.122634	0.114416	0.366886	0.546523	1053.7
3189-61_2	Enterokinase	-0.0585888	0.0342881	0.114375	0.367327	0.546897	1054.96
3624-3_4	Marapsin	0.0122422	0.0455739	0.114333	0.36777	0.547272	1056.23
8072-19_3	MZT1	-0.205542	0.0301077	0.114292	0.368212	0.547363	1057.5
5230-99_3	HMGR	-0.094495	0.022714	0.114292	0.368212	0.547363	1057.5
7832-181_3	Protein disulfide isomerase A3	-0.0101676	0.0519033	0.114125	0.369985	0.548296	1062.6
4414-69_2	SP-D	0.0519402	0.0397715	0.114167	0.369541	0.548296	1061.32
7851-30_3	ANR46	0.288097	0.0386535	0.114125	0.369985	0.548296	1062.6
9486-13_3	DB125	-0.196746	-0.0164548	0.114125	0.369985	0.548296	1062.6
10554-23_3	BGAL	-0.133368	-0.0178736	0.114167	0.369541	0.548296	1061.32
3635-76_4	OCAD1	0.0810158	-0.0196957	0.114209	0.369098	0.548296	1060.05
8376-25_4	LSHB	-0.124524	-0.0152556	0.114084	0.370429	0.548671	1063.87
9547-29_3	EMID1	-0.112816	0.013212	0.114042	0.370874	0.549046	1065.15
7802-53_3	NSG1	-0.451943	0.0285632	0.114001	0.371318	0.549421	1066.43
7204-1_3	CEA21	-1.15532	0.0327741	0.113959	0.371763	0.549513	1067.7
2190-55_1	Coagulation Factor XI	0.0428007	0.0110644	0.113959	0.371763	0.549513	1067.7
9337-43_3	TKN1	-0.115361	0.0175285	0.113918	0.372209	0.549889	1068.98
9955-40_3	RN148	-0.397459	0.00463653	0.113876	0.372655	0.549982	1070.26
5031-10_1	SPTA2	0.0300382	0.00457841	0.113876	0.372655	0.549982	1070.26
7179-69_3	NFASC	0.0823965	0.0218539	0.113544	0.376233	0.554978	1080.54
6526-77_3	OBP2A	0.187425	0.0631169	0.113295	0.378931	0.55525	1088.29
8877-22_3	F176C	-0.0615793	0.0379483	0.113378	0.378031	0.55525	1085.7
6458-6_3	RPN1	-0.0380573	0.0357655	0.113295	0.378931	0.55525	1088.29
6151-18_3	MP2K3	0.103869	0.021714	0.113295	0.378931	0.55525	1088.29
9005-16_3	PLXA1	-0.165785	0.0163068	0.113419	0.377581	0.55525	1084.41
7983-1_3	PCDGM	0.0540022	0.0135912	0.113419	0.377581	0.55525	1084.41
6919-3_3	HBAZ	-0.0430974	0.00405531	0.113295	0.378931	0.55525	1088.29
7082-2_3	B3GN6	-0.00446196	0.00148433	0.113378	0.378031	0.55525	1085.7
2625-53_4	HSP 90a/b	0.101943	-0.00086963	0.113378	0.378031	0.55525	1085.7
4708-3_2	17-beta-HSD 1	-0.0231332	-0.00701128	0.113336	0.378481	0.55525	1087
2972-57_2	BMP-7	-0.0962356	-0.00966044	0.113336	0.378481	0.55525	1087
4707-50_2	2014-03-03	-0.0280093	-0.0222265	0.113295	0.378931	0.55525	1088.29
4982-54_1	Elafin	-0.0903947	-0.0627442	0.113336	0.378481	0.55525	1087
10494-48_3	Procalcitonin	0.0329594	0.0450465	0.113253	0.379382	0.555628	1089.59
4154-57_2	P-Selectin	0.075925	0.0470643	0.113211	0.379833	0.556005	1090.88
8916-32_3	STIM1	0.0144035	0.0550272	0.113087	0.381189	0.557705	1094.77
2967-8_1	VCAM-1	-0.0549082	-0.00644849	0.113045	0.381642	0.557799	1096.07
8851-42_3	F171B	0.101211	-0.0245234	0.113045	0.381642	0.557799	1096.07
5363-51_3	Semaphorin 3E	0.0770858	0.0653524	0.113004	0.382094	0.558177	1097.38
5631-83_3	MOTI	0.033977	0.0929319	0.112962	0.382548	0.558271	1098.68
10011-65_3	OCRL	-0.00131872	0.050778	0.112962	0.382548	0.558271	1098.68
9172-69_3	MMP-8	0.0548434	0.0841329	0.112879	0.383455	0.55846	1101.28
8303-102_3	MYG1	0.440464	0.0664758	0.112879	0.383455	0.55846	1101.28
5599-88_3	PCYXL	-0.0137732	0.0375374	0.112921	0.383001	0.55846	1099.98
10504-6_3	F159B	-0.00623943	-0.0454608	0.112879	0.383455	0.55846	1101.28
9894-13_3	MYO6	-0.0636074	0.0537905	0.112838	0.383909	0.558555	1102.59
8352-26_3	SIG12	-0.0155057	-0.0566009	0.112838	0.383909	0.558555	1102.59
3342-76_4	ABL2	0.102145	0.0434404	0.112796	0.384364	0.558933	1103.89
4929-55_1	SHBG	0.0918485	0.124146	0.112754	0.384819	0.559028	1105.2
8093-13_3	K1161	-0.071766	0.0466293	0.112754	0.384819	0.559028	1105.2
4230-1_2	IF4G2	0.0797419	0.0986448	0.112713	0.385274	0.559407	1106.51
3066-12_1	Galectin-3	0.0276662	0.0356377	0.11263	0.386185	0.560447	1109.12
4267-81_3	PESC	0.00874987	0.0331166	0.112588	0.386641	0.560825	1110.43
2849-49_1	AIF1	0.0467613	0.0738026	0.112464	0.388012	0.560831	1114.37
3810-50_2	FGR	-0.0797207	0.0587453	0.112464	0.388012	0.560831	1114.37
8905-20_3	KCMB3	-0.0193687	0.0351656	0.112505	0.387555	0.560831	1113.06
9582-93_3	SUSD1	0.0394507	0.0281677	0.112505	0.387555	0.560831	1113.06
8840-61_3	C1s	0.0504145	0.00918756	0.112464	0.388012	0.560831	1114.37
8699-43_3	CRIM1	-0.020912	0.00703787	0.112505	0.387555	0.560831	1113.06
7071-23_4	MA1B1	-0.0186075	-0.019791	0.112547	0.387098	0.560831	1111.75
3053-49_2	Flt3 ligand	-0.000313893	-0.014554	0.112422	0.38847	0.56121	1115.68
4550-3_2	FYN	-0.19135	0.0245501	0.112381	0.388927	0.561589	1117
8037-53_3	DJB14	-0.0167374	0.00351427	0.112256	0.390303	0.563292	1120.95
5097-14_3	KI3S1	-0.0286606	0.0197415	0.112214	0.390762	0.563671	1122.27
3025-50_1	bFGF	1.38876	0.119098	0.111716	0.396298	0.56975	1138.17
7092-7_3	PDILT	-0.459591	0.0177037	0.111757	0.395835	0.56975	1136.84
6969-14_3	WFDC5	0.0606151	0.016641	0.111674	0.396762	0.56975	1139.5
5261-13_3	ABL2	0.0419563	0.00859543	0.111674	0.396762	0.56975	1139.5
9049-2_3	MOT4	-0.0733621	0.00289237	0.111799	0.395372	0.56975	1135.51
8314-71_3	GNS	-0.00910718	-0.00216675	0.111716	0.396298	0.56975	1138.17
4717-55_2	IL-3	0.0388877	-0.0159797	0.111757	0.395835	0.56975	1136.84
[truncated: 874 more rows]
